# Supplementary material for: Discovery of Spatial Peptide Signatures for Neuroblastoma Risk Assessment by MALDI Mass Spectrometry Imaging
Source: Cancers (Basel). 2021 Jun 25;13(13):3184. doi: 10.3390/cancers13133184 (PMC8269054; doi:10.3390/cancers13133184)
Supplement: Supplementary file 1 [file cancers-13-03184-s001.zip]

Archive with 7 entries (6 files):
- cancers-1214542 supplementary final/
- cancers-1214542 supplementary final/Supplementary Table S1.xlsx
- cancers-1214542 supplementary final/Supplementary Table S2.xlsx
- cancers-1214542 supplementary final/Supplementary Table S3.xlsx
- cancers-1214542 supplementary final/Supplementary Table S4.xlsx
- cancers-1214542 supplementary final/Supplementary_Figures.pdf
- cancers-1214542 supplementary final/Supplementary_File S1.pdf
