# Supplementary material for: Discovery of Spatial Peptide Signatures for Neuroblastoma Risk Assessment by MALDI Mass Spectrometry Imaging
Source: Cancers (Basel). 2021 Jun 25;13(13):3184. doi: 10.3390/cancers13133184 (PMC8269054; doi:10.3390/cancers13133184)
Supplement: Supplementary file 1 [file cancers-13-03184-s001.zip › cancers-1214542 supplementary final/Supplementary Table S1.xlsx]

## Sheet: Tabelle1
Supplementary Table S1: Aligned m/z values from cell-rich tumor region in neuroblastoma sections and tumor microarray cores.
Centroid [m/z]	± [Da]	Whole tissue section				Tumor microarray cores
		ROC [AUC] of tumor malignant areas: HR VS nHR	Maximum mean intensity: HR malignant areas (TIC)	Maximum mean intensity: nHR malignant areas (TIC)	Wilcoxon rank sum-corrected p-value of malignant areas: HR VS nHR	ROC [AUC] of tumor malignant areas: HR VS nHR	Maximum mean intensity: HR malignant areas (TIC)	Maximum mean intensity: nHR malignant areas (TIC)	Wilcoxon rank sum-corrected p-value of malignant areas: HR VS nHR
601.465	0.3	0.202112	1.6509	2.37273	<0.001	0.342586	1.2611	1.43154	<0.001
602.365	0.3	0.908625	4.20879	2.84453	<0.001	0.606022	2.44834	2.13915	<0.001
603.265	0.3	0.641421	3.45344	2.73582	<0.001	0.541961	2.29875	2.1691	<0.001
615.267	0.3	0.511358	1.91974	1.92447	<0.001	0.390171	1.54847	1.6952	<0.001
616.467	0.3	0.188554	2.20123	3.16548	<0.001	0.403576	1.34735	1.46939	<0.001
617.367	0.3	0.373041	2.87775	3.30735	<0.001	0.461642	1.93169	1.95529	<0.001
618.267	0.3	0.925325	3.80887	2.12873	<0.001	0.66761	1.99124	1.66332	<0.001
619.467	0.3	0.418496	2.46015	2.59051	<0.001	0.545081	1.58614	1.46449	<0.001
628.468	0.3	0.594319	2.58737	2.20185	<0.001	0.404923	1.26749	1.32672	<0.001
629.368	0.3	0.681831	2.21227	1.94214	<0.001	0.490901	1.53592	1.52627	0.895135
630.268	0.3	0.505901	3.90438	3.86899	0.0150581	0.497296	3.33562	3.1874	0.54749
631.468	0.3	0.305405	2.43357	2.95725	<0.001	0.487513	1.65159	1.61693	0.094407
632.368	0.3	0.65779	2.9265	1.99209	<0.001	0.742392	2.03259	1.52139	<0.001
644.37	0.3	0.873639	7.74397	4.36641	<0.001	0.720815	4.18269	3.22732	<0.001
645.27	0.3	0.835745	3.60217	2.46821	<0.001	0.637149	2.46897	2.14871	<0.001
650.07	0.3	0.249848	0.780005	1.07569	<0.001	0.433045	1.2352	1.736	<0.001
664.472	0.3	0.247044	3.70647	4.91	<0.001	0.479584	2.64047	2.65556	0.00164726
672.273	0.3	0.461492	1.97911	2.08957	<0.001	0.537884	1.79525	1.69195	<0.001
673.473	0.3	0.454718	2.65454	2.81787	<0.001	0.453947	1.7088	1.72004	<0.001
674.373	0.3	0.435749	2.61531	2.76875	<0.001	0.435114	2.00749	2.09335	<0.001
678.273	0.3	0.914477	5.561	2.57985	<0.001	0.735725	3.37896	2.58369	<0.001
686.374	0.3	0.512816	3.00307	2.82856	<0.001	0.518337	2.27443	2.19551	0.015652
688.474	0.3	0.627261	2.99889	2.68018	<0.001	0.585443	1.43603	1.30758	<0.001
700.475	0.3	0.733651	4.15835	3.36235	<0.001	0.622527	1.90316	1.66677	<0.001
701.376	0.3	0.342409	9.42629	11.7549	<0.001	0.576552	6.01769	5.79015	<0.001
702.276	0.3	0.511743	4.15984	4.15507	<0.001	0.539346	2.77626	2.72293	<0.001
703.476	0.3	0.306805	3.65635	4.55202	<0.001	0.386127	2.3863	2.55077	<0.001
704.376	0.3	0.362293	2.35591	2.70346	<0.001	0.401007	1.84414	1.95559	<0.001
714.277	0.3	0.649514	1.79789	1.56464	<0.001	0.548658	1.44946	1.37148	<0.001
715.477	0.3	0.529279	4.18181	4.1208	<0.001	0.656587	2.8606	2.36338	<0.001
716.377	0.3	0.616547	2.85377	2.59918	<0.001	0.64274	2.29054	1.94496	<0.001
717.277	0.3	0.519822	2.64314	2.62388	<0.001	0.486631	2.2747	2.23309	0.340969
738.279	0.3	0.269395	2.80227	4.62561	<0.001	0.40575	2.91185	3.20289	<0.001
739.48	0.3	0.135493	1.95714	3.81997	<0.001	0.39913	1.47595	1.63285	<0.001
757.481	0.3	0.275146	2.04277	2.66052	<0.001	0.416842	1.36156	1.44433	<0.001
758.381	0.3	0.761246	3.79323	3.08651	<0.001	0.583871	2.47347	2.24037	<0.001
766.482	0.3	0.0757461	2.02343	4.73603	<0.001	0.278705	1.8094	2.42554	<0.001
767.382	0.3	0.123782	1.76947	3.0433	<0.001	0.346201	1.73008	2.02433	<0.001
771.283	0.3	0.76401	2.71781	2.06972	<0.001	0.582303	2.05242	1.86816	<0.001
773.383	0.3	0.305677	3.52617	4.41602	<0.001	0.465465	2.38424	2.4378	<0.001
781.484	0.3	0.486004	2.89571	2.88872	<0.001	0.440554	1.40145	1.45915	<0.001
784.484	0.3	0.808025	3.199	2.29442	<0.001	0.676432	1.78846	1.51801	<0.001
785.384	0.3	0.887548	4.86526	2.87664	<0.001	0.729564	2.83965	2.22709	<0.001
786.584	0.3	0.189473	2.77996	4.34526	<0.001	0.498854	1.30718	1.27808	0.760676
787.485	0.3	0.425787	2.72489	2.9439	<0.001	0.478983	1.66132	1.67982	0.0115149
788.385	0.3	0.420442	7.29125	8.2395	<0.001	0.507811	10.0207	11.0416	0.673671
789.585	0.3	0.194904	3.26166	4.6966	<0.001	0.470099	2.78773	3.00731	<0.001
793.485	0.3	0.234705	6.62828	11.1253	<0.001	0.659631	3.43964	3.01353	<0.001
794.385	0.3	0.262693	3.50107	5.02346	<0.001	0.513129	2.37742	2.40678	0.170687
795.285	0.3	0.879407	5.86035	3.68521	<0.001	0.675663	3.56818	2.78529	<0.001
796.485	0.3	0.720364	3.77286	3.07637	<0.001	0.604499	2.01701	1.75776	<0.001
801.586	0.3	0.133144	1.5391	2.50173	<0.001	0.437758	1.00659	1.04684	<0.001
802.486	0.3	0.229349	2.9947	4.14087	<0.001	0.368619	2.38499	2.76781	<0.001
803.386	0.3	0.388647	2.49502	2.82585	<0.001	0.417141	2.23789	2.46976	<0.001
805.486	0.3	0.432089	2.70212	2.96045	<0.001	0.424634	1.5566	1.64325	<0.001
806.386	0.3	0.66351	2.43555	2.04456	<0.001	0.443299	1.74488	1.79576	<0.001
807.287	0.3	0.606949	1.3125	1.21457	<0.001	0.549703	1.41439	1.33627	<0.001
815.387	0.3	0.450785	3.99246	4.13068	<0.001	0.481204	2.9276	2.94296	0.0320548
816.588	0.3	0.170271	7.83898	12.7998	<0.001	0.405423	3.62145	4.19987	<0.001
817.488	0.3	0.319946	6.13808	7.9045	<0.001	0.503566	4.12714	4.1757	0.845502
818.388	0.3	0.32168	2.25493	2.74901	<0.001	0.431939	2.1611	2.33211	<0.001
822.588	0.3	0.366956	2.09434	2.22463	<0.001	0.501814	1.06251	1.04955	0.476302
823.488	0.3	0.506305	2.75904	2.66201	0.00816502	0.447925	1.41484	1.46313	<0.001
831.589	0.3	0.144387	2.91496	4.59041	<0.001	0.494598	1.91709	1.95375	0.1066
832.489	0.3	0.323856	2.91233	3.54302	<0.001	0.514537	2.48706	2.47493	0.186392
836.39	0.3	0.923099	15.9034	8.06997	<0.001	0.737398	10.6095	7.74022	<0.001
837.59	0.3	0.518922	7.04577	6.68661	<0.001	0.564966	3.68884	3.30604	<0.001
838.49	0.3	0.595882	4.45902	4.0831	<0.001	0.532546	2.87406	2.74665	<0.001
840.59	0.3	0.832789	5.67432	3.5098	<0.001	0.664393	1.94815	1.62035	<0.001
841.49	0.3	0.869293	3.7475	2.51006	<0.001	0.684522	2.10282	1.75688	<0.001
842.39	0.3	0.741842	4.21974	3.0526	<0.001	0.459354	3.58829	3.31306	<0.001
843.59	0.3	0.408335	3.25431	3.55304	<0.001	0.467427	1.69644	1.60901	<0.001
844.49	0.3	0.402428	3.12347	3.54537	<0.001	0.469327	2.14965	2.11794	0.00322374
845.391	0.3	0.378694	2.66585	3.07005	<0.001	0.483639	2.09568	2.07367	0.189742
847.491	0.3	0.258079	1.54231	2.09476	<0.001	0.276684	1.23275	1.51801	<0.001
848.391	0.3	0.399765	2.21474	2.51507	<0.001	0.330876	1.94078	2.29754	<0.001
850.491	0.3	0.361232	4.02039	4.63494	<0.001	0.584958	4.31281	3.77074	<0.001
852.591	0.3	0.773582	5.7405	3.52128	<0.001	0.679777	2.35993	1.86083	<0.001
853.491	0.3	0.92065	5.69109	3.14568	<0.001	0.630548	3.01279	2.54658	<0.001
854.992	0.3	0.49434	0.832504	0.930983	<0.001	0.390847	0.879239	1.19832	<0.001
856.492	0.3	0.530656	2.81743	2.77841	<0.001	0.441855	1.93583	1.99398	<0.001
857.392	0.3	0.273338	6.18401	8.95474	<0.001	0.524771	3.19501	3.64969	0.00204156
858.592	0.3	0.204632	4.23538	7.05081	<0.001	0.507288	1.83277	1.83061	0.142992
859.492	0.3	0.310477	3.18255	3.96788	<0.001	0.454298	2.00543	2.0867	<0.001
868.493	0.3	0.850542	8.64663	5.0314	<0.001	0.730074	3.9763	2.95186	<0.001
869.393	0.3	0.901525	4.95635	3.01803	<0.001	0.682885	2.94787	2.45511	<0.001
870.593	0.3	0.581014	2.90464	2.74225	<0.001	0.449636	1.74622	1.72671	<0.001
871.493	0.3	0.450187	2.87914	3.0983	<0.001	0.417953	1.85401	1.95968	<0.001
872.393	0.3	0.506641	2.60109	2.62003	0.023825	0.51481	2.08948	1.9726	0.0514559
873.594	0.3	0.347325	3.0137	3.61524	<0.001	0.500871	1.52755	1.50702	0.407739
874.494	0.3	0.64461	4.60526	4.03627	<0.001	0.516568	2.72948	2.60132	0.0110672
875.394	0.3	0.576019	4.67283	4.3315	<0.001	0.520828	3.48435	3.31614	<0.001
876.594	0.3	0.328368	2.27242	2.82628	<0.001	0.49862	1.35658	1.33859	0.65485
885.595	0.3	0.340692	3.32398	3.98468	<0.001	0.451301	1.41959	1.60862	<0.001
886.495	0.3	0.825602	8.19142	5.66145	<0.001	0.678761	4.01792	3.27029	<0.001
887.395	0.3	0.814474	4.76696	3.55741	<0.001	0.528569	2.95875	2.86074	<0.001
888.595	0.3	0.438593	2.10265	2.34282	<0.001	0.35849	1.12243	1.26064	<0.001
890.395	0.3	0.813183	3.04733	2.12907	<0.001	0.556183	2.01432	1.82318	<0.001
894.596	0.3	0.209686	2.54292	3.80242	<0.001	0.489963	1.22843	1.23249	0.0746415
895.496	0.3	0.264825	3.24345	4.34355	<0.001	0.492696	1.9114	1.89962	0.890333
896.396	0.3	0.346486	2.19841	2.52135	<0.001	0.482529	1.7809	1.77777	0.0425617
898.496	0.3	0.863612	6.63439	3.96382	<0.001	0.655919	4.53041	3.6767	<0.001
899.396	0.3	0.93229	3.9222	2.35517	<0.001	0.600886	2.67741	2.36548	<0.001
900.596	0.3	0.560783	4.10063	3.81412	<0.001	0.453499	1.9961	2.0492	<0.001
901.496	0.3	0.327337	9.31094	11.7242	<0.001	0.494049	6.52615	6.60294	0.400655
902.397	0.3	0.350966	4.95852	6.11422	<0.001	0.479505	3.20955	3.26353	0.0101525
903.597	0.3	0.270001	2.29544	3.05354	<0.001	0.401971	1.29607	1.37715	<0.001
914.398	0.3	0.526475	2.23945	2.21714	<0.001	0.513423	1.83762	1.7331	0.0286037
915.598	0.3	0.26163	4.34871	6.05779	<0.001	0.522708	2.2219	2.10674	0.00583834
916.498	0.3	0.324046	3.43761	4.23744	<0.001	0.478229	2.31363	2.33162	0.00391736
917.398	0.3	0.352141	2.10623	2.44741	<0.001	0.439319	1.77034	1.84274	<0.001
919.498	0.3	0.400996	2.36497	2.57999	<0.001	0.495672	1.86296	1.88852	0.488608
921.599	0.3	0.255356	2.17175	2.94244	<0.001	0.512017	1.32556	1.35754	0.690918
922.499	0.3	0.143247	2.12287	3.52804	<0.001	0.346906	1.8925	2.27379	<0.001
923.399	0.3	0.296285	2.01104	2.51629	<0.001	0.377689	1.83139	2.07128	<0.001
927.599	0.3	0.416867	3.22031	3.4529	<0.001	0.563361	2.0773	1.96824	<0.001
928.499	0.3	0.419903	2.95213	3.25025	<0.001	0.522759	2.14795	2.11363	0.0126715
929.399	0.3	0.347055	4.46388	5.44535	<0.001	0.573894	2.97932	2.71389	<0.001
930.599	0.3	0.262986	3.78074	5.13434	<0.001	0.537257	1.99943	1.8789	<0.001
931.5	0.3	0.316988	2.6219	3.27657	<0.001	0.494766	1.92896	1.89837	0.557091
932.4	0.3	0.164648	1.68795	2.91646	<0.001	0.311713	1.79049	2.37194	<0.001
933.6	0.3	0.204904	1.52099	2.17461	<0.001	0.359646	1.08752	1.23522	<0.001
936.6	0.3	0.349548	2.80689	3.34086	<0.001	0.446423	1.37475	1.43544	<0.001
937.5	0.3	0.348953	2.56502	3.03929	<0.001	0.440563	1.6751	1.75477	<0.001
940.5	0.3	0.493487	3.09261	3.10756	<0.001	0.490996	2.06072	2.07533	0.491866
943.501	0.3	0.265445	12.3157	18.6958	<0.001	0.562179	5.51269	5.2381	<0.001
944.401	0.3	0.432035	34.5698	38.1172	<0.001	0.619078	25.9561	25.0794	<0.001
945.601	0.3	0.315768	21.0496	27.118	<0.001	0.623555	14.1416	13.1388	<0.001
946.501	0.3	0.414726	7.58571	8.53104	<0.001	0.585307	6.8484	6.7671	<0.001
947.401	0.3	0.516653	2.42808	2.43423	<0.001	0.510398	2.26542	2.3276	0.208974
949.501	0.3	0.319395	2.10732	2.66285	<0.001	0.44045	1.7073	1.78769	<0.001
951.602	0.3	0.252994	2.10158	2.79159	<0.001	0.396281	1.41863	1.5683	<0.001
955.502	0.3	0.332836	2.85439	3.4886	<0.001	0.487431	1.91188	1.93695	<0.001
957.602	0.3	0.376578	8.09661	9.53547	<0.001	0.471063	3.21967	3.44435	<0.001
958.502	0.3	0.463517	7.08999	7.37979	<0.001	0.49155	3.55205	3.60409	0.336696
959.402	0.3	0.537729	3.44394	3.20995	<0.001	0.501976	2.08873	2.073	0.821174
960.603	0.3	0.469297	2.61189	2.73539	<0.001	0.499633	1.48558	1.46815	0.568752
966.603	0.3	0.269115	2.77405	3.75448	<0.001	0.511761	2.60057	2.57061	0.406226
967.503	0.3	0.396284	3.08601	3.47371	<0.001	0.504362	3.06451	3.12806	0.890333
971.704	0.3	0.246273	5.38344	8.66282	<0.001	0.520171	2.09828	2.16779	0.0329947
972.604	0.3	0.362043	6.22064	7.60917	<0.001	0.510319	3.10405	3.16984	0.3243
973.504	0.3	0.461651	4.08129	4.31685	<0.001	0.478804	2.43712	2.49855	0.0116563
974.404	0.3	0.480026	2.46067	2.507	<0.001	0.425869	1.84946	1.99517	<0.001
976.504	0.3	0.383885	4.20108	5.01543	<0.001	0.508839	2.89333	2.9246	0.117053
977.404	0.3	0.444036	2.66862	2.91844	<0.001	0.505523	2.34933	2.3388	0.335865
982.505	0.3	0.314003	4.03243	5.20066	<0.001	0.506588	3.66769	3.70371	0.845502
983.405	0.3	0.375058	2.87051	3.34913	<0.001	0.525823	2.85794	2.72578	<0.001
984.605	0.3	0.350507	2.69039	3.23382	<0.001	0.507483	1.69113	1.65755	0.107553
985.505	0.3	0.307245	9.03157	12.7394	<0.001	0.453457	4.54451	5.22108	<0.001
986.705	0.3	0.249699	4.19402	6.81225	<0.001	0.430875	1.50871	1.69313	<0.001
987.605	0.3	0.25703	3.29402	4.60574	<0.001	0.390637	1.83504	2.11923	<0.001
988.505	0.3	0.351001	2.4811	2.93938	<0.001	0.448288	1.97832	2.06791	<0.001
1013.41	0.3	0.578762	2.34193	2.07333	<0.001	0.464894	1.8377	1.88737	<0.001
1014.61	0.3	0.458652	2.62479	2.78792	<0.001	0.509231	1.59198	1.56848	0.3178
1015.51	0.3	0.395075	2.45604	2.81238	<0.001	0.494588	1.90072	1.86731	0.949053
1019.71	0.3	0.146834	1.56408	2.778	<0.001	0.481256	1.05969	1.0391	0.51505
1020.61	0.3	0.366279	2.47614	2.82396	<0.001	0.528819	1.58351	1.49019	<0.001
1026.61	0.3	0.476845	2.32633	2.45362	<0.001	0.447527	1.61776	1.68045	<0.001
1027.51	0.3	0.2118	2.42838	3.47777	<0.001	0.450764	1.78915	1.83575	<0.001
1028.71	0.3	0.318622	7.91925	10.4722	<0.001	0.569727	2.59615	2.5322	<0.001
1029.61	0.3	0.318094	5.90053	7.67531	<0.001	0.525962	2.88395	2.91957	<0.001
1030.51	0.3	0.357569	3.1565	3.77282	<0.001	0.47123	1.95068	2.03214	<0.001
1032.61	0.3	0.55945	7.20435	6.49236	<0.001	0.508312	8.43148	8.25835	0.162705
1033.51	0.3	0.547997	5.31087	4.77103	<0.001	0.438776	4.93557	5.37138	<0.001
1034.71	0.3	0.367694	1.71823	1.96525	<0.001	0.520739	1.42856	1.38553	<0.001
1039.51	0.3	0.354864	3.3768	4.23161	<0.001	0.523387	3.02708	2.87638	<0.001
1040.41	0.3	0.361874	2.05637	2.4599	<0.001	0.443349	2.00176	2.08675	<0.001
1045.51	0.3	0.540401	2.90658	2.78533	<0.001	0.429239	2.0143	2.07779	<0.001
1048.51	0.3	0.310753	2.12058	2.57754	<0.001	0.375116	1.72812	1.99799	<0.001
1060.51	0.3	0.424319	1.55198	1.72256	<0.001	0.427082	1.36445	1.44741	<0.001
1062.61	0.3	0.421979	2.13891	2.2796	<0.001	0.439334	1.35101	1.44338	<0.001
1066.51	0.3	0.282682	2.03154	2.67618	<0.001	0.408276	1.771	1.92492	<0.001
1070.71	0.3	0.371662	2.32331	2.77958	<0.001	0.444638	1.29741	1.41077	<0.001
1071.61	0.3	0.45741	2.91453	3.14578	<0.001	0.407845	1.64887	1.86694	<0.001
1072.51	0.3	0.503078	2.75383	2.81204	0.595472	0.422247	2.01728	2.25148	<0.001
1077.61	0.3	0.494798	2.45799	2.622	<0.001	0.513988	1.60146	1.58039	0.0227003
1094.72	0.3	0.838152	2.72568	1.79852	<0.001	0.660468	1.48388	1.23746	<0.001
1095.62	0.3	0.85329	11.8583	6.03947	<0.001	0.756946	4.4722	3.23267	<0.001
1096.52	0.3	0.849707	7.0894	4.00169	<0.001	0.676414	3.74068	3.08495	<0.001
1105.52	0.3	0.909581	24.1106	8.42767	<0.001	0.788785	11.9388	7.69307	<0.001
1106.72	0.3	0.790232	8.05943	4.67642	<0.001	0.723937	2.91848	2.258	<0.001
1107.62	0.3	0.918625	6.17428	3.24269	<0.001	0.699909	2.77513	2.30106	<0.001
1111.52	0.3	0.867279	6.03589	3.09209	<0.001	0.741508	3.07524	2.22632	<0.001
1112.72	0.3	0.783799	3.21223	2.23111	<0.001	0.665656	1.37833	1.14453	<0.001
1117.52	0.3	0.724021	2.95519	2.3602	<0.001	0.577754	2.12861	1.93579	<0.001
1118.42	0.3	0.523107	1.58325	1.55247	<0.001	0.509491	1.5667	1.53618	0.124758
1119.62	0.3	0.447112	1.81038	1.92387	<0.001	0.488557	1.33361	1.33862	0.135829
1127.72	0.3	0.359036	2.41041	2.92008	<0.001	0.448573	1.63623	1.66676	<0.001
1128.62	0.3	0.460841	2.81172	2.96398	<0.001	0.484773	2.14204	2.12269	0.303736
1131.62	0.3	0.422206	2.3533	2.64825	<0.001	0.408782	1.56576	1.68435	<0.001
1133.42	0.3	0.743735	2.57198	1.92206	<0.001	0.532544	1.96115	1.8716	<0.001
1138.52	0.3	0.903131	8.74588	3.89037	<0.001	0.868536	4.42646	2.67848	<0.001
1139.42	0.3	0.83672	4.58233	2.3013	<0.001	0.826921	2.73374	1.94127	<0.001
1140.62	0.3	0.884045	3.80273	2.46753	<0.001	0.663308	1.89903	1.59556	<0.001
1143.62	0.3	0.531891	4.39394	4.38065	<0.001	0.371709	3.45235	3.99534	<0.001
1144.52	0.3	0.495481	3.08121	3.21313	<0.001	0.392491	2.93462	3.25238	<0.001
1156.52	0.3	0.330493	2.63854	3.09359	<0.001	0.449688	1.89444	1.97665	<0.001
1157.72	0.3	0.217647	2.159	2.93762	<0.001	0.497544	1.27489	1.26337	0.715819
1160.72	0.3	0.130229	1.45257	2.30683	<0.001	0.367379	1.2235	1.36195	<0.001
1161.62	0.3	0.382725	2.50658	2.89445	<0.001	0.438434	1.95869	2.06387	<0.001
1177.53	0.3	0.195144	2.03258	2.99622	<0.001	0.437555	1.69544	1.7724	<0.001
1178.73	0.3	0.0722596	1.3719	2.44438	<0.001	0.373802	1.0706	1.18551	<0.001
1185.63	0.3	0.469164	2.6868	2.85712	<0.001	0.497201	1.70551	1.69185	0.927968
1187.73	0.3	0.380455	2.43736	2.81397	<0.001	0.491774	1.38795	1.38626	0.323238
1188.63	0.3	0.499107	2.79873	2.83411	0.109823	0.476603	1.86637	1.89295	0.00392919
1194.63	0.3	0.633312	3.33302	2.86827	<0.001	0.540748	2.7022	2.56633	<0.001
1198.83	0.3	0.159404	11.7729	19.5187	<0.001	0.499836	5.605	5.93173	0.66922
1199.73	0.3	0.377724	14.4764	17.3279	<0.001	0.459373	8.19437	8.86886	<0.001
1200.63	0.3	0.261043	5.88453	7.74729	<0.001	0.414776	4.66338	5.20376	<0.001
1201.53	0.3	0.439114	2.51929	2.723	<0.001	0.460944	2.07242	2.11738	<0.001
1209.63	0.3	0.437291	2.2358	2.45876	<0.001	0.430301	1.63007	1.72446	<0.001
1210.53	0.3	0.345447	1.86926	2.1971	<0.001	0.419778	1.5545	1.67067	<0.001
1211.73	0.3	0.338018	2.08947	2.50813	<0.001	0.368516	1.51708	1.69355	<0.001
1220.73	0.3	0.35183	2.2886	2.72281	<0.001	0.419037	1.81443	1.95892	<0.001
1221.63	0.3	0.447823	3.06478	3.25077	<0.001	0.457979	2.33228	2.41147	<0.001
1223.73	0.3	0.568541	2.7319	2.5761	<0.001	0.5276	1.40461	1.36175	<0.001
1235.73	0.3	0.830896	3.663	2.41349	<0.001	0.581905	1.65708	1.50018	<0.001
1236.63	0.3	0.675455	3.35871	2.83899	<0.001	0.534109	2.22614	2.13012	<0.001
1240.53	0.3	0.73067	2.74097	2.11718	<0.001	0.674058	1.9017	1.66881	<0.001
1241.73	0.3	0.716097	2.96484	2.46443	<0.001	0.653483	1.61236	1.44901	<0.001
1267.53	0.3	0.870889	5.36239	3.09464	<0.001	0.741287	3.27271	2.4773	<0.001
1268.73	0.3	0.825248	5.30758	3.4481	<0.001	0.654382	2.15006	1.83333	<0.001
1269.63	0.3	0.791695	4.34374	3.27505	<0.001	0.675724	2.58546	2.21517	<0.001
1271.74	0.3	0.427641	2.70925	2.98771	<0.001	0.313274	1.89967	2.32531	<0.001
1303.54	0.3	0.846377	5.52305	2.77166	<0.001	0.712615	2.61486	2.05922	<0.001
1304.74	0.3	0.768936	3.26575	2.45536	<0.001	0.600139	1.66899	1.50401	<0.001
1313.74	0.3	0.280501	2.03366	2.64029	<0.001	0.431994	1.2964	1.42366	<0.001
1314.64	0.3	0.469563	2.27486	2.38194	<0.001	0.416134	1.69807	1.90395	<0.001
1320.64	0.3	0.910195	5.6851	2.5788	<0.001	0.799581	2.79889	1.99933	<0.001
1321.54	0.3	0.889237	3.33063	1.67521	<0.001	0.735135	1.94895	1.55022	<0.001
1325.74	0.3	0.334503	11.7416	14.7191	<0.001	0.605322	8.31233	7.32175	<0.001
1326.64	0.3	0.495423	8.56199	8.80387	<0.001	0.566827	6.36559	6.02041	<0.001
1327.84	0.3	0.368497	4.45792	5.35068	<0.001	0.582557	2.48472	2.26825	<0.001
1328.74	0.3	0.494522	2.92347	3.00445	<0.001	0.533485	2.13011	2.07348	<0.001
1329.64	0.3	0.342444	1.99528	2.38354	<0.001	0.449279	1.75767	1.86271	<0.001
1330.84	0.3	0.164765	1.58063	2.42564	<0.001	0.354584	1.19134	1.41782	<0.001
1334.74	0.3	0.651856	3.17874	2.31825	<0.001	0.581769	1.7761	1.61152	<0.001
1335.64	0.3	0.648095	2.92956	2.16137	<0.001	0.569112	2.21287	2.01433	<0.001
1336.84	0.3	0.330621	1.61465	1.95866	<0.001	0.495477	1.12236	1.12795	0.216221
1337.74	0.3	0.536776	2.58161	2.50363	<0.001	0.486984	1.56518	1.57182	0.135829
1341.64	0.3	0.738814	3.54065	2.76723	<0.001	0.511136	2.22863	2.19664	0.284534
1347.64	0.3	0.41037	2.70016	2.96278	<0.001	0.463441	2.35001	2.4952	<0.001
1348.84	0.3	0.307805	2.06397	2.56469	<0.001	0.480561	1.41301	1.45223	0.00479983
1349.74	0.3	0.431197	2.54475	2.79258	<0.001	0.458459	1.92846	2.01298	<0.001
1355.74	0.3	0.394169	2.46999	2.78452	<0.001	0.54351	1.76448	1.65483	<0.001
1367.75	0.3	0.262983	2.04901	2.7224	<0.001	0.431959	1.43549	1.50652	<0.001
1377.65	0.3	0.791366	3.95447	2.3681	<0.001	0.511363	2.52449	2.45557	0.0973331
1378.55	0.3	0.726188	2.57066	1.80623	<0.001	0.495477	2.06271	2.0478	0.949053
1390.85	0.3	0.373466	1.45235	1.64491	<0.001	0.415204	1.15046	1.22695	<0.001
1422.65	0.3	0.438482	2.29327	2.43734	<0.001	0.426669	1.59886	1.6884	<0.001
1428.65	0.3	0.576625	2.77203	2.60525	<0.001	0.539265	2.05747	1.97797	<0.001
1429.85	0.3	0.449095	2.34343	2.53112	<0.001	0.494174	1.35268	1.35134	0.911806
1459.85	0.3	0.723728	5.15834	3.40123	<0.001	0.658984	2.10365	1.84792	<0.001
1460.75	0.3	0.885553	8.27525	3.89163	<0.001	0.706876	3.36469	2.70274	<0.001
1461.65	0.3	0.781404	3.84224	2.64556	<0.001	0.672759	2.76411	2.34029	<0.001
1465.86	0.3	0.718962	4.03503	2.80731	<0.001	0.635218	1.93366	1.72439	<0.001
1466.76	0.3	0.893162	7.27648	3.63069	<0.001	0.619261	3.39559	2.99636	<0.001
1467.66	0.3	0.772438	3.43563	2.49139	<0.001	0.597297	2.30205	2.09715	<0.001
1475.76	0.3	0.445202	2.0958	2.27484	<0.001	0.457325	2.11651	2.20725	<0.001
1477.86	0.3	0.895101	5.23208	2.9059	<0.001	0.746797	3.11024	2.50917	<0.001
1478.76	0.3	0.927803	5.79431	2.54676	<0.001	0.799029	3.27736	2.4527	<0.001
1479.66	0.3	0.899924	2.67349	1.58794	<0.001	0.677745	2.05609	1.80795	<0.001
1481.76	0.3	0.327376	4.63719	5.79068	<0.001	0.567563	3.02987	3.25157	<0.001
1482.96	0.3	0.3724	3.57046	4.31569	<0.001	0.543977	1.46775	1.50057	<0.001
1483.86	0.3	0.268818	2.55731	3.46163	<0.001	0.521565	1.80802	1.90387	<0.001
1489.86	0.3	0.28928	2.58226	3.56145	<0.001	0.438635	2.97963	3.17645	<0.001
1490.76	0.3	0.495252	2.40885	2.4439	<0.001	0.436242	2.27478	2.4608	<0.001
1491.96	0.3	0.351657	1.68688	2.04846	<0.001	0.472059	1.50361	1.52905	<0.001
1494.66	0.3	0.713274	3.02828	2.28549	<0.001	0.588638	2.0159	1.87843	<0.001
1495.86	0.3	0.592094	2.92771	2.60934	<0.001	0.525808	1.53165	1.48034	<0.001
1496.76	0.3	0.588808	2.90435	2.68825	<0.001	0.528767	1.82246	1.75285	<0.001
1501.86	0.3	0.579946	1.95773	1.72426	<0.001	0.466368	1.32302	1.37284	<0.001
1502.76	0.3	0.633989	1.91914	1.62145	<0.001	0.466407	1.489	1.56243	<0.001
1505.76	0.3	0.573838	3.35958	2.87773	<0.001	0.461281	2.50218	2.5814	<0.001
1529.76	0.3	0.464219	7.45287	6.91206	<0.001	0.510467	2.66039	3.04935	0.299162
1530.66	0.3	0.560516	6.59147	5.00288	<0.001	0.545329	2.91185	3.06403	<0.001
1531.86	0.3	0.492495	3.75958	3.37442	<0.001	0.525335	1.68981	1.72397	<0.001
1532.76	0.3	0.607544	2.90888	2.36667	<0.001	0.467607	1.76661	1.8357	<0.001
1546.86	0.3	0.878912	4.42832	2.33272	<0.001	0.590266	2.15653	1.99646	<0.001
1547.76	0.3	0.916793	4.3067	2.12005	<0.001	0.58124	2.45587	2.30473	<0.001
1561.87	0.3	0.925569	3.51953	1.84826	<0.001	0.614958	1.76627	1.60408	<0.001
1562.77	0.3	0.910347	8.07753	3.17173	<0.001	0.742732	4.648	3.46376	<0.001
1563.67	0.3	0.894233	4.97353	2.12029	<0.001	0.735967	3.20273	2.52275	<0.001
1564.87	0.3	0.923541	4.85614	2.4895	<0.001	0.670258	2.21215	1.90677	<0.001
1580.77	0.3	0.801602	3.43098	2.40086	<0.001	0.624004	2.33313	2.09498	<0.001
1585.87	0.3	0.776176	6.05499	3.95931	<0.001	0.713003	3.11244	2.48922	<0.001
1586.77	0.3	0.897898	6.73738	3.16018	<0.001	0.736153	3.27271	2.61891	<0.001
1612.87	0.3	0.284199	2.12516	2.69348	<0.001	0.376854	1.52576	1.7288	<0.001
1615.87	0.3	0.261843	2.00261	2.80198	<0.001	0.370478	2.14169	2.44994	<0.001
1616.77	0.3	0.281169	1.83421	2.60861	<0.001	0.345379	2.30026	2.74551	<0.001
1620.97	0.3	0.31553	1.34725	1.75377	<0.001	0.376327	1.64337	1.88191	<0.001
1621.87	0.3	0.644275	2.23639	2.07525	<0.001	0.348485	2.40546	2.88474	<0.001
1622.77	0.3	0.546483	1.92179	1.92501	<0.001	0.342091	2.22111	2.60352	<0.001
1628.77	0.3	0.66561	3.5499	2.68458	<0.001	0.567133	2.39128	2.24211	<0.001
1629.67	0.3	0.735287	3.11681	1.94828	<0.001	0.687065	2.30145	1.87032	<0.001
1630.87	0.3	0.657641	2.78543	2.15152	<0.001	0.59588	1.89469	1.73909	<0.001
1655.78	0.3	0.738693	3.3191	2.45959	<0.001	0.623597	1.93799	1.79329	<0.001
1701.98	0.3	0.194938	1.34758	2.17309	<0.001	0.362541	2.09934	2.44443	<0.001
1702.88	0.3	0.220061	1.74416	2.70142	<0.001	0.340774	2.06099	2.41463	<0.001
1706.78	0.3	0.872526	5.36531	2.56179	<0.001	0.742257	2.31983	1.87886	<0.001
1707.68	0.3	0.897748	4.86849	1.97669	<0.001	0.806371	2.28403	1.70165	<0.001
1708.88	0.3	0.855887	3.34425	2.05188	<0.001	0.626074	1.89736	1.71514	<0.001
1743.68	0.3	0.817418	2.64325	1.70712	<0.001	0.576377	3.04728	2.86903	<0.001
1744.88	0.3	0.718676	2.89606	2.42285	<0.001	0.620332	3.08069	2.80004	<0.001
1750.88	0.3	0.480513	2.32984	2.43743	<0.001	0.451564	1.60155	1.67174	<0.001
1751.79	0.3	0.84509	3.49157	2.17819	<0.001	0.612085	1.95591	1.76145	<0.001
1752.99	0.3	0.637385	2.86907	2.48714	<0.001	0.56513	1.63078	1.53929	<0.001
1775.79	0.3	0.901256	3.67269	1.78249	<0.001	0.70066	2.09542	1.76741	<0.001
1776.99	0.3	0.8394	3.27144	2.07795	<0.001	0.692201	1.83473	1.55766	<0.001
1816.89	0.3	0.815096	3.31213	2.19917	<0.001	0.660088	2.32278	2.03709	<0.001
1817.79	0.3	0.824553	2.79489	1.77559	<0.001	0.67824	2.29693	1.98505	<0.001
1820.79	0.3	0.864782	2.75143	1.5826	<0.001	0.691015	1.91026	1.64278	<0.001
1821.99	0.3	0.722839	2.65846	1.87893	<0.001	0.58968	1.55688	1.44955	<0.001
1832.79	0.3	0.915599	3.73779	1.56056	<0.001	0.693953	1.94451	1.63435	<0.001
1833.99	0.3	0.872855	3.66591	1.9858	<0.001	0.672663	1.90711	1.6438	<0.001
1834.89	0.3	0.925993	4.44179	1.8782	<0.001	0.773461	2.73397	2.04785	<0.001
1835.79	0.3	0.920907	3.13402	1.48086	<0.001	0.749488	2.08001	1.66762	<0.001
1849.9	0.3	0.502937	1.78586	1.81385	0.678718	0.479123	1.58114	1.62372	<0.001
1850.8	0.3	0.680366	2.12284	1.81817	<0.001	0.619663	1.62348	1.47737	<0.001
1924	0.3	0.820524	3.54227	2.08087	<0.001	0.649563	1.834	1.60201	<0.001
1924.9	0.3	0.863376	3.16711	1.71352	<0.001	0.690296	1.89556	1.56956	<0.001
1962.11	0.3	0.603176	2.03987	1.90431	<0.001	0.657838	1.46366	1.31579	<0.001
1963.01	0.3	0.717604	3.54255	2.47683	<0.001	0.706693	2.07065	1.76671	<0.001
1963.91	0.3	0.767024	2.60889	1.70347	<0.001	0.665281	1.67297	1.51354	<0.001
1993.01	0.3	0.777516	2.98079	1.59373	<0.001	0.631001	1.64122	1.44156	<0.001
1993.91	0.3	0.749654	2.40866	1.47375	<0.001	0.62453	1.55231	1.40403	<0.001
2005.01	0.3	0.879932	3.04287	1.57146	<0.001	0.719933	1.9017	1.57192	<0.001
2026.91	0.3	0.857254	2.24784	1.23901	<0.001	0.728435	1.77661	1.48076	<0.001
2028.11	0.3	0.756606	1.8601	1.3659	<0.001	0.647931	1.47407	1.32619	<0.001
2042.22	0.3	0.854301	2.18111	1.17331	<0.001	0.73271	1.50462	1.23613	<0.001
2043.12	0.3	0.810649	2.24974	1.47207	<0.001	0.669183	1.55253	1.35642	<0.001
2056.02	0.3	0.887216	2.37146	1.2809	<0.001	0.633626	1.5925	1.45978	<0.001
2056.92	0.3	0.88269	5.79192	2.31035	<0.001	0.834007	3.2031	2.15506	<0.001
2058.12	0.3	0.81783	4.58418	2.45397	<0.001	0.80187	2.71009	1.94914	<0.001
2059.02	0.3	0.894909	4.60537	2.00335	<0.001	0.772746	2.33679	1.80329	<0.001
2073.12	0.3	0.889425	2.77774	1.39749	<0.001	0.732964	1.66201	1.36573	<0.001
2104.02	0.3	0.832638	3.55178	1.61784	<0.001	0.693528	2.28084	1.90804	<0.001
2105.22	0.3	0.659707	2.21115	1.73503	<0.001	0.699393	2.32674	1.88409	<0.001
2106.12	0.3	0.77598	3.27428	1.96479	<0.001	0.732289	2.50384	1.9945	<0.001
2107.02	0.3	0.778784	2.51235	1.54842	<0.001	0.672475	1.93884	1.66284	<0.001
2115.12	0.3	0.824186	4.45265	2.17666	<0.001	0.759535	3.57042	2.54515	<0.001
2116.02	0.3	0.854094	5.21511	2.22091	<0.001	0.76558	3.7523	2.6644	<0.001
2117.22	0.3	0.791841	3.04699	1.76021	<0.001	0.732887	2.41877	1.87175	<0.001
2118.12	0.3	0.810094	2.56929	1.62684	<0.001	0.707062	2.15005	1.78982	<0.001
2215.93	0.3	0.822923	4.10068	1.71947	<0.001	0.679099	2.28956	1.81451	<0.001
2217.13	0.3	0.692542	4.79718	2.99479	<0.001	0.647326	2.94063	2.3585	<0.001
2218.03	0.3	0.760061	3.66147	1.89278	<0.001	0.636327	2.26253	1.88556	<0.001
2454.16	0.3	0.815582	2.68546	1.57065	<0.001	0.716367	2.09155	1.64581	<0.001
2455.36	0.3	0.7945	2.36162	1.3658	<0.001	0.715514	1.81114	1.40966	<0.001
2456.26	0.3	0.802828	2.36451	1.32865	<0.001	0.737633	1.82194	1.36459	<0.001
2471.26	0.3	0.912358	3.35478	1.08958	<0.001	0.770594	1.91005	1.36829	<0.001
2472.16	0.3	0.888765	2.48124	0.99631	<0.001	0.759334	1.66012	1.25698	<0.001
2475.16	0.3	0.567795	1.31425	1.25542	<0.001	0.511036	1.20592	1.22348	0.861602
2476.36	0.3	0.542116	1.94169	1.80029	<0.001	0.552742	1.41362	1.63884	<0.001
2477.26	0.3	0.806523	2.3479	1.49633	<0.001	0.622597	1.74506	1.6323	<0.001
2478.16	0.3	0.879367	2.39882	1.19121	<0.001	0.740285	1.6964	1.32492	<0.001
2489.26	0.3	0.376837	1.33203	1.64955	<0.001	0.482352	1.26979	1.54123	0.00262481
2490.46	0.3	0.377525	2.16713	2.69434	<0.001	0.565084	1.535	1.81703	<0.001
2491.36	0.3	0.502903	2.20661	2.24925	0.08119	0.57813	1.56619	1.74032	<0.001
2503.36	0.3	0.382435	1.62159	2.00091	<0.001	0.545702	1.48566	1.61248	<0.001
2504.56	0.3	0.330452	2.05198	2.75774	<0.001	0.612478	1.58891	1.41282	<0.001
2505.46	0.3	0.400134	2.46903	2.96305	<0.001	0.665788	1.88572	1.51859	<0.001
2506.36	0.3	0.533096	2.27906	2.15357	<0.001	0.600795	1.75566	1.58551	<0.001
2519.27	0.3	0.734169	2.27263	1.62031	<0.001	0.685819	1.60499	1.35325	<0.001
2520.17	0.3	0.692563	2.37051	1.71622	<0.001	0.729171	1.73284	1.38335	<0.001
2521.37	0.3	0.621228	1.99084	1.66641	<0.001	0.674197	1.6244	1.30321	<0.001
2690.28	0.3	0.848046	2.01745	0.922477	<0.001	0.771783	1.81701	1.28147	<0.001
2691.18	0.3	0.887093	2.24239	0.803161	<0.001	0.779276	1.63156	1.13252	<0.001
2705.28	0.3	0.861364	3.47237	1.39935	<0.001	0.784514	2.73068	1.78841	<0.001
2706.18	0.3	0.870873	4.00411	1.45449	<0.001	0.792807	2.51625	1.61333	<0.001
2707.38	0.3	0.846537	2.55897	1.0995	<0.001	0.77057	2.20533	1.50535	<0.001
2708.28	0.3	0.87515	2.11779	0.913665	<0.001	0.748241	1.7948	1.31332	<0.001
2727.49	0.3	0.769615	1.68975	0.994225	<0.001	0.707762	1.46667	1.18268	<0.001
2728.39	0.3	0.786479	3.40061	1.82513	<0.001	0.771599	2.4561	1.73748	<0.001
2729.29	0.3	0.823338	2.90025	1.39617	<0.001	0.7646	2.08788	1.51795	<0.001
2854.4	0.3	0.626067	1.10816	0.905376	<0.001	0.5772	1.12356	1.01346	<0.001
2869.4	0.3	0.797066	3.60764	1.68244	<0.001	0.735002	2.37695	1.69975	<0.001
2870.3	0.3	0.807823	4.58532	1.86047	<0.001	0.71992	2.21406	1.6226	<0.001
2871.5	0.3	0.768557	3.51656	1.83168	<0.001	0.732989	2.41845	1.73398	<0.001
2872.4	0.3	0.778285	2.732	1.39053	<0.001	0.702915	1.87855	1.45967	<0.001
2885.3	0.3	0.833729	2.04585	0.812853	<0.001	0.695048	1.31082	1.01448	<0.001
2886.5	0.3	0.808193	2.58133	1.01305	<0.001	0.7226	1.63414	1.15099	<0.001
2887.4	0.3	0.842847	2.84072	0.889256	<0.001	0.74421	1.85191	1.22299	<0.001
2888.3	0.3	0.840393	1.61611	0.680257	<0.001	0.675458	1.15496	0.928292	<0.001
2950.41	0.3	0.794145	1.64609	0.742416	<0.001	0.718247	1.24448	0.966934	<0.001
2951.61	0.3	0.788886	1.92293	0.805682	<0.001	0.735512	1.35674	1.0089	<0.001
2952.51	0.3	0.818568	2.0493	0.8371	<0.001	0.767547	1.66549	1.15973	<0.001
2953.41	0.3	0.791468	1.52653	0.72729	<0.001	0.695065	1.17601	0.954303	<0.001
2959.41	0.3	0.866328	2.84097	1.12967	<0.001	0.778088	2.16697	1.45464	<0.001
2960.31	0.3	0.876159	3.5023	1.20619	<0.001	0.794856	2.27904	1.43027	<0.001
2961.51	0.3	0.834476	2.5989	1.07725	<0.001	0.760153	1.91315	1.32328	<0.001
2962.41	0.3	0.838774	2.04513	0.912208	<0.001	0.755461	1.80234	1.26416	<0.001
3085.42	0.3	0.700835	1.35951	0.825062	<0.001	0.641133	1.27232	1.03498	<0.001
3100.43	0.3	0.850037	2.22309	0.902366	<0.001	0.757585	2.20309	1.44033	<0.001
3101.63	0.3	0.843394	2.42989	0.781039	<0.001	0.733453	2.10016	1.46293	<0.001
3102.53	0.3	0.843421	3.04787	1.1466	<0.001	0.754382	2.68236	1.7341	<0.001
3103.43	0.3	0.846487	2.31466	0.955524	<0.001	0.744001	1.97018	1.37053	<0.001
