# Supplementary material for: Discovery of Spatial Peptide Signatures for Neuroblastoma Risk Assessment by MALDI Mass Spectrometry Imaging
Source: Cancers (Basel). 2021 Jun 25;13(13):3184. doi: 10.3390/cancers13133184 (PMC8269054; doi:10.3390/cancers13133184)
Supplement: Supplementary file 1 [file cancers-13-03184-s001.zip › cancers-1214542 supplementary final/Supplementary Table S2.xlsx]

## Sheet: Tabelle1
Supplementary Table S2: Segmentation map of the tumor cell-rich regions in sections from high-risk neuroblastoma (HR) and neuroblastomas from other risk groups (nHR).
Sample	Seg tree initial tumor: 1 (0-0-0)	Seg tree initial tumor: 2 (0-0-1)	Seg tree initial tumor: 3 (0-1)	Seg tree initial tumor: 4 (1)	Seg tree initial tumor: unused spectra
HR	8791 (24.65%)	13418 (37.63%)	1270 (3.56%)	12182 (34.16%)	0 (0.00%)
nHR	10366 (6.76%)	1456 (0.95%)	491 (0.32%)	141089 (91.97%)	0 (0.00%)
