# Supplementary material for: Discovery of Spatial Peptide Signatures for Neuroblastoma Risk Assessment by MALDI Mass Spectrometry Imaging
Source: Cancers (Basel). 2021 Jun 25;13(13):3184. doi: 10.3390/cancers13133184 (PMC8269054; doi:10.3390/cancers13133184)
Supplement: Supplementary file 1 [file cancers-13-03184-s001.zip › cancers-1214542 supplementary final/Supplementary Table S3.xlsx]

## Sheet: Sheet1
Supplementary Table S3: Identified discriminative MALDI-MSI m/z values by using nanoLC-MS/MS
Centroid [m/z]	± [Da]	ROC [AUC] malignant areas of HR/nHR	Significance rating - WRS	LC-MS/MS [Mr+H+ cal.]	MOWSE Scores	Deviation [Da]	Protein	Modification
899.396	0.3	0.93229	<0.001	899.556	34.4	0.160044	Alpha-enolase OS=Homo sapiens OX=9606 GN=ENO1 PE=1 SV=2
1924	0.3	0.820524	<0.001	1923.98	22.0	0.0180629	Alpha-enolase OS=Homo sapiens OX=9606 GN=ENO1 PE=1 SV=2	Oxidation: 7
1235.73	0.3	0.830896	<0.001	1235.69	65.9	0.0418193	Apolipoprotein A-I OS=Homo sapiens OX=9606 GN=APOA1 PE=1 SV=1
1612.87	0.3	0.284199	<0.001	1612.79	62.2	0.0846714	Apolipoprotein A-I OS=Homo sapiens OX=9606 GN=APOA1 PE=1 SV=1
858.592	0.3	0.204632	<0.001	858.468	15.0	0.124042	Caldesmon OS=Homo sapiens OX=9606 GN=CALD1 PE=1 SV=3
1341.64	0.3	0.738814	<0.001	1341.64	67.4	0.0020184	Caldesmon OS=Homo sapiens OX=9606 GN=CALD1 PE=1 SV=3
2005.01	0.3	0.879932	<0.001	2005.02	71.0	0.0136614	Caldesmon OS=Homo sapiens OX=9606 GN=CALD1 PE=1 SV=3
868.493	0.3	0.850542	<0.001	868.464	48.1	0.0294591	Collagen alpha-2(I) chain OS=Homo sapiens OX=9606 GN=COL1A2 PE=1 SV=7
1562.77	0.3	0.910347	<0.001	1562.79	127.	0.0221453	Collagen alpha-2(I) chain OS=Homo sapiens OX=9606 GN=COL1A2 PE=1 SV=7
2026.91	0.3	0.857254	<0.001	2027.02	65.8	0.106559	Collagen alpha-2(I) chain OS=Homo sapiens OX=9606 GN=COL1A2 PE=1 SV=7
1459.85	0.3	0.723728	<0.001	1459.86	40.5	0.0131254	Collagen alpha-3(VI) chain OS=Homo sapiens OX=9606 GN=COL6A3 PE=1 SV=5
2056.92	0.3	0.88269	<0.001	2057.04	59.4	0.117203	Collagen alpha-3(VI) chain OS=Homo sapiens OX=9606 GN=COL6A3 PE=1 SV=5	Oxidation: 1
766.482	0.3	0.0757461	<0.001	766.457	21.7	0.025001	Dihydropyrimidinase-related protein 1 OS=Homo sapiens OX=9606 GN=CRMP1 PE=1 SV=1
922.499	0.3	0.143247	<0.001	922.515	22.3	0.0155139	Dihydropyrimidinase-related protein 1 OS=Homo sapiens OX=9606 GN=CRMP1 PE=1 SV=1
1833.99	0.3	0.872855	<0.001	1833.91	65.1	0.081034	Endoplasmic reticulum chaperone BiP OS=Homo sapiens OX=9606 GN=HSPA5 PE=1 SV=2
2042.22	0.3	0.854301	<0.001	2042.05	25.6	0.168727	Endoplasmic reticulum chaperone BiP OS=Homo sapiens OX=9606 GN=HSPA5 PE=1 SV=2
2043.12	0.3	0.810649	<0.001	2043	66.3	0.115737	Hemoglobin subunit alpha OS=Homo sapiens OX=9606 GN=HBA1 PE=1 SV=2
2886.5	0.3	0.808193	<0.001	2886.43	15.2	0.071652	Hemoglobin subunit alpha OS=Homo sapiens OX=9606 GN=HBA1 PE=1 SV=2
1477.86	0.3	0.895101	<0.001	1477.79	28.1	0.0662916	Histone H2B type 1-C/E/F/G/I OS=Homo sapiens OX=9606 GN=HIST1H2BC PE=1 SV=4
1743.68	0.3	0.817418	<0.001	1743.82	96.2	0.139288	Histone H2B type 1-C/E/F/G/I OS=Homo sapiens OX=9606 GN=HIST1H2BC PE=1 SV=4
1775.79	0.3	0.901256	<0.001	1775.81	123.	0.019118	Histone H2B type 1-C/E/F/G/I OS=Homo sapiens OX=9606 GN=HIST1H2BC PE=1 SV=4	Oxidation: 2, 5
1586.77	0.3	0.897898	<0.001	1586.77	89.4	0.00434422	Keratin, type I cytoskeletal 9 OS=Homo sapiens OX=9606 GN=KRT9 PE=1 SV=3
2705.28	0.3	0.861364	<0.001	2705.16	67.9	0.118889	Keratin, type I cytoskeletal 9 OS=Homo sapiens OX=9606 GN=KRT9 PE=1 SV=3
1267.5	0.3	0.871	<0.001	1267.65	63.9	0.12	Neuroblast differentiation-associated protein AHNAK OS=Homo sapiens OX=9606 GN=AHNAK PE=1 SV=2
1832.79	0.3	0.915599	<0.001	1832.88	44.7	0.0873315	Neuroblast differentiation-associated protein AHNAK OS=Homo sapiens OX=9606 GN=AHNAK PE=1 SV=2
1706.78	0.3	0.872526	<0.001	1706.78	31.2	0.00311083	Nidogen-2 OS=Homo sapiens OX=9606 GN=NID2 PE=1 SV=3
2455.36	0.3	0.7945	<0.001	2455.17	34.9	0.186427	Nidogen-2 OS=Homo sapiens OX=9606 GN=NID2 PE=1 SV=3
1178.73	0.3	0.0722596	<0.001	1178.57	32.2	0.161206	Nucleolin OS=Homo sapiens OX=9606 GN=NCL PE=1 SV=3
1561.87	0.3	0.925569	<0.001	1561.68	79.9	0.189471	Nucleolin OS=Homo sapiens OX=9606 GN=NCL PE=1 SV=3
1834.89	0.3	0.925993	<0.001	1834.89	16.9	0.00298156	Plectin OS=Homo sapiens OX=9606 GN=PLEC PE=1 SV=3
2888.3	0.3	0.840393	<0.001	2888.4	48.7	0.104755	Plectin OS=Homo sapiens OX=9606 GN=PLEC PE=1 SV=3
840.59	0.3	0.832789	<0.001	840.53	49.8	0.0598361	Pyruvate kinase PKM OS=Homo sapiens OX=9606 GN=PKM PE=1 SV=4
1019.71	0.3	0.146834	<0.001	1019.52	16.6	0.194364	Pyruvate kinase PKM OS=Homo sapiens OX=9606 GN=PKM PE=1 SV=4
1821.99	0.3	0.722839	<0.001	1821.92	37.4	0.0736405	Pyruvate kinase PKM OS=Homo sapiens OX=9606 GN=PKM PE=1 SV=4
771.283	0.3	0.76401	<0.001	771.447	17.4	0.164163	Vinculin OS=Homo sapiens OX=9606 GN=VCL PE=1 SV=4
1105.52	0.3	0.909581	<0.001	1105.61	26.3	0.0899304	Vinculin OS=Homo sapiens OX=9606 GN=VCL PE=1 SV=4
