# Supplementary material for: Discovery of Spatial Peptide Signatures for Neuroblastoma Risk Assessment by MALDI Mass Spectrometry Imaging
Source: Cancers (Basel). 2021 Jun 25;13(13):3184. doi: 10.3390/cancers13133184 (PMC8269054; doi:10.3390/cancers13133184)
Supplement: Supplementary file 1 [file cancers-13-03184-s001.zip › cancers-1214542 supplementary final/Supplementary Table S4.xlsx]

## Sheet: Table S4
Supplementary Table S4: Protein identification by LC-MS of neuroblastoma whole tissue section
#	Δ m/z [ppm]	MH+ meas.	MH+ calc.	Scores	Range	Sequence	Int.	Accession	Protein	Row	User Flag	OK	Cmpd.	Mr meas.	m/z calc.	Mr calc.	z	Δ m/z [Da]	Δ MH+ [Da]	Δ MH+ [ppm]	RMS90 [ppm]	RMS90 [Da]	RMS [ppm]	RMS [Da]	Rt [min]	#Cmpds.	AltPep.	Site [%]	Rank	IntCov. [%]	P	Modifications	Point Mutation	Crosslinked Peptides	Type	Location	Dataset	Search Result	Peptide Source	Fraction
1283.12	-2.27386	5129.46	5129.47	24.6 (M.expect:0.0,M.score:24.6)	2 - 58	M.ADPAAPTPAAPAPAQAPAPAPEAVPAPAAAPVPAPAPASDSASGPSSDSGPEAGSQR.L	1578	UBE2O_HUMAN	(E3-independent) E2 ubiquitin-conjugating enzyme OS=Homo sapiens OX=9606 GN=UBE2O PE=1 SV=3	4070		TRUE	14953	5128.45	1283.12	5128.47	4	-0.00291764	-0.0116706	-2.2752	8.1825	0.00748119	10.6703	0.00851257	61.9843	1	1		1	20.5348	0	Acetyl: 1			CID	/Neuroblastom-Imaging/Imaging-Sample1/ZW_Neuroblastom_E22965-08_3_RA3_01_4008.d/+MS2(1283.1206), 55.0eV, 62.0min #17097	ZW_Neuroblastom_E22965-08_3_RA3_01_4008.d	SwissProt-human-oReAlk2019_Mascot_2019-10-14 16:08:34	Protein Search
430.732	2.30704	860.457	860.455	14.3 (M.expect:0.0,M.score:14.3)	29 - 36	K.GGIMLPEK.S	56520	CH10_HUMAN	10 kDa heat shock protein, mitochondrial OS=Homo sapiens OX=9606 GN=HSPE1 PE=1 SV=2	88		TRUE	7249	859.449	430.731	859.447	2	0.000993715	0.00198743	2.30974	3.24013	0.00153449	10.8597	0.00850043	25.5248	1	1		1	11.0424	0	Oxidation: 4			CID	/Neuroblastom-Imaging/Imaging-Sample1/ZW_Neuroblastom_E22965-08_3_RA3_01_4008.d/+MS2(430.7319), 24.2eV, 25.5min #6232	ZW_Neuroblastom_E22965-08_3_RA3_01_4008.d	SwissProt-human-oReAlk2019_Mascot_2019-10-14 16:08:34	Protein Search
454.256	1.17632	907.505	907.504	20.6 (M.expect:0.0,M.score:20.6)	9 - 15	K.FLPLFDR.V	18322	CH10_HUMAN	10 kDa heat shock protein, mitochondrial OS=Homo sapiens OX=9606 GN=HSPE1 PE=1 SV=2	143		TRUE	14003	906.497	454.255	906.496	2	0.000534352	0.0010687	1.17763	4.98452	0.00167772	21.6175	0.0155663	49.9612	1	1		1	54.193	0				CID	/Neuroblastom-Imaging/Imaging-Sample1/ZW_Neuroblastom_E22965-08_3_RA3_01_4008.d/+MS2(454.2560), 25.2eV, 50.0min #14014	ZW_Neuroblastom_E22965-08_3_RA3_01_4008.d	SwissProt-human-oReAlk2019_Mascot_2019-10-14 16:08:34	Protein Search
454.266	0.703697	907.525	907.525	15.1 (M.expect:0.0,M.score:15.1)	44 - 51	R.NLLSVAYK.N	1073866	1433B_HUMAN	14-3-3 protein beta/alpha OS=Homo sapiens OX=9606 GN=YWHAB PE=1 SV=3	146		TRUE	1767	906.518	454.266	906.517	2	0.000319666	0.000639331	0.704478	2.33703	0.00149119	3.04907	0.00186768	34.1206	2	1		1	37.144	0				CID	/Neuroblastom-Imaging/Imaging-Sample1/ZW_Neuroblastom_E22965-08_3_RA3_01_4008.d/+MS2(454.2663), 25.2eV, 34.1min #9258	ZW_Neuroblastom_E22965-08_3_RA3_01_4008.d	SwissProt-human-oReAlk2019_Mascot_2019-10-14 16:08:34	Protein Search
454.266	0.769737	907.525	907.525	26.2 (M.expect:0.0,M.score:26.2)	44 - 51	R.NLLSVAYK.N	229228	1433B_HUMAN	14-3-3 protein beta/alpha OS=Homo sapiens OX=9606 GN=YWHAB PE=1 SV=3	152		TRUE	8772	906.518	454.266	906.517	2	0.000349666	0.000699331	0.770592	3.56881	0.00194364	16.9673	0.00708237	34.0665	2	1		1	25.7945	0				CID	/Neuroblastom-Imaging/Imaging-Sample1/ZW_Neuroblastom_E22965-08_3_RA3_01_4008.d/+MS2(454.2664), 25.2eV, 34.1min #9238	ZW_Neuroblastom_E22965-08_3_RA3_01_4008.d	SwissProt-human-oReAlk2019_Mascot_2019-10-14 16:08:34	Protein Search
501.96	0.975549	1503.87	1503.86	25.9 (M.expect:0.0,M.score:25.9)	44 - 57	R.NLLSVAYKNVVGAR.R	119092	1433B_HUMAN	14-3-3 protein beta/alpha OS=Homo sapiens OX=9606 GN=YWHAB PE=1 SV=3	1939		TRUE	10231	1502.86	501.96	1502.86	3	0.000489687	0.00146906	0.976856	10.0917	0.00498839	28.6274	0.00818113	41.471	1	1		1	21.892	1				CID	/Neuroblastom-Imaging/Imaging-Sample1/ZW_Neuroblastom_E22965-08_3_RA3_01_4008.d/+MS2(501.9601), 25.0eV, 41.5min #11634	ZW_Neuroblastom_E22965-08_3_RA3_01_4008.d	SwissProt-human-oReAlk2019_Mascot_2019-10-14 16:08:34	Protein Search
533.587	2.92576	1598.75	1598.74	21.1 (M.expect:0.0,M.score:21.1)	30 - 43	K.AVTEQGHELSNEER.N	168520	1433B_HUMAN	14-3-3 protein beta/alpha OS=Homo sapiens OX=9606 GN=YWHAB PE=1 SV=3	2280		TRUE	6037	1597.74	533.585	1597.73	3	0.00156114	0.00468343	2.92944	16.3544	0.00982776	20.912	0.0124361	15.6083	2	1		1	19.7224	0				CID	/Neuroblastom-Imaging/Imaging-Sample1/ZW_Neuroblastom_E22965-08_3_RA3_01_4008.d/+MS2(533.5866), 25.7eV, 15.6min #2768	ZW_Neuroblastom_E22965-08_3_RA3_01_4008.d	SwissProt-human-oReAlk2019_Mascot_2019-10-14 16:08:34	Protein Search
799.875	1.52517	1598.74	1598.74	25.2 (M.expect:0.0,M.score:25.2)	30 - 43	K.AVTEQGHELSNEER.N	23922	1433B_HUMAN	14-3-3 protein beta/alpha OS=Homo sapiens OX=9606 GN=YWHAB PE=1 SV=3	2281		TRUE	9888	1597.74	799.874	1597.73	2	0.00121994	0.00243988	1.52613	6.61509	0.00511132	9.40325	0.00620478	15.6188	2	1		1	17.6779	0				CID	/Neuroblastom-Imaging/Imaging-Sample1/ZW_Neuroblastom_E22965-08_3_RA3_01_4008.d/+MS2(799.8751), 45.0eV, 15.6min #2775	ZW_Neuroblastom_E22965-08_3_RA3_01_4008.d	SwissProt-human-oReAlk2019_Mascot_2019-10-14 16:08:34	Protein Search
454.266	0.703697	907.525	907.525	15.1 (M.expect:0.0,M.score:15.1)	43 - 50	R.NLLSVAYK.N	1073866	1433E_HUMAN	14-3-3 protein epsilon OS=Homo sapiens OX=9606 GN=YWHAE PE=1 SV=1	144		TRUE	1767	906.518	454.266	906.517	2	0.000319666	0.000639331	0.704478	2.33703	0.00149119	3.04907	0.00186768	34.1206	2	1		1	37.144	0				CID	/Neuroblastom-Imaging/Imaging-Sample1/ZW_Neuroblastom_E22965-08_3_RA3_01_4008.d/+MS2(454.2663), 25.2eV, 34.1min #9258	ZW_Neuroblastom_E22965-08_3_RA3_01_4008.d	SwissProt-human-oReAlk2019_Mascot_2019-10-14 16:08:34	Protein Search
454.266	0.769737	907.525	907.525	26.2 (M.expect:0.0,M.score:26.2)	43 - 50	R.NLLSVAYK.N	229228	1433E_HUMAN	14-3-3 protein epsilon OS=Homo sapiens OX=9606 GN=YWHAE PE=1 SV=1	153		TRUE	8772	906.518	454.266	906.517	2	0.000349666	0.000699331	0.770592	3.56881	0.00194364	16.9673	0.00708237	34.0665	2	1		1	25.7945	0				CID	/Neuroblastom-Imaging/Imaging-Sample1/ZW_Neuroblastom_E22965-08_3_RA3_01_4008.d/+MS2(454.2664), 25.2eV, 34.1min #9238	ZW_Neuroblastom_E22965-08_3_RA3_01_4008.d	SwissProt-human-oReAlk2019_Mascot_2019-10-14 16:08:34	Protein Search
597.804	1.36294	1194.6	1194.6	29.6 (M.expect:0.0,M.score:29.6)	143 - 153	K.EAAENSLVAYK.A	320320	1433E_HUMAN	14-3-3 protein epsilon OS=Homo sapiens OX=9606 GN=YWHAE PE=1 SV=1	830		TRUE	4146	1193.59	597.804	1193.59	2	0.000814772	0.00162954	1.36409	9.01461	0.00881629	27.4158	0.0156306	26.6728	1	1		1	23.294	0				CID	/Neuroblastom-Imaging/Imaging-Sample1/ZW_Neuroblastom_E22965-08_3_RA3_01_4008.d/+MS2(597.8045), 32.9eV, 26.7min #6667	ZW_Neuroblastom_E22965-08_3_RA3_01_4008.d	SwissProt-human-oReAlk2019_Mascot_2019-10-14 16:08:34	Protein Search
762.854	0.785754	1524.7	1524.7	25.5 (M.expect:0.0,M.score:25.5)	1 - 12	-.MDDREDLVYQAK.L	167402	1433E_HUMAN	14-3-3 protein epsilon OS=Homo sapiens OX=9606 GN=YWHAE PE=1 SV=1	2002		TRUE	10368	1523.69	762.854	1523.69	2	0.000599416	0.00119883	0.786273	5.98118	0.00511774	6.84653	0.00584414	37.5006	1	1		1	43.7362	1	Acetyl: 1			CID	/Neuroblastom-Imaging/Imaging-Sample1/ZW_Neuroblastom_E22965-08_3_RA3_01_4008.d/+MS2(762.8542), 40.5eV, 37.5min #10394	ZW_Neuroblastom_E22965-08_3_RA3_01_4008.d	SwissProt-human-oReAlk2019_Mascot_2019-10-14 16:08:34	Protein Search
454.266	0.703697	907.525	907.525	15.1 (M.expect:0.0,M.score:15.1)	43 - 50	R.NLLSVAYK.N	1073866	1433F_HUMAN	14-3-3 protein eta OS=Homo sapiens OX=9606 GN=YWHAH PE=1 SV=4	145		TRUE	1767	906.518	454.266	906.517	2	0.000319666	0.000639331	0.704478	2.33703	0.00149119	3.04907	0.00186768	34.1206	2	1		1	37.144	0				CID	/Neuroblastom-Imaging/Imaging-Sample1/ZW_Neuroblastom_E22965-08_3_RA3_01_4008.d/+MS2(454.2663), 25.2eV, 34.1min #9258	ZW_Neuroblastom_E22965-08_3_RA3_01_4008.d	SwissProt-human-oReAlk2019_Mascot_2019-10-14 16:08:34	Protein Search
454.266	0.769737	907.525	907.525	26.2 (M.expect:0.0,M.score:26.2)	43 - 50	R.NLLSVAYK.N	229228	1433F_HUMAN	14-3-3 protein eta OS=Homo sapiens OX=9606 GN=YWHAH PE=1 SV=4	149		TRUE	8772	906.518	454.266	906.517	2	0.000349666	0.000699331	0.770592	3.56881	0.00194364	16.9673	0.00708237	34.0665	2	1		1	25.7945	0				CID	/Neuroblastom-Imaging/Imaging-Sample1/ZW_Neuroblastom_E22965-08_3_RA3_01_4008.d/+MS2(454.2664), 25.2eV, 34.1min #9238	ZW_Neuroblastom_E22965-08_3_RA3_01_4008.d	SwissProt-human-oReAlk2019_Mascot_2019-10-14 16:08:34	Protein Search
578.808	1.5139	1156.61	1156.61	36.4 (M.expect:0.0,M.score:36.4)	2 - 10	M.GDREQLLQR.A	631680	1433F_HUMAN	14-3-3 protein eta OS=Homo sapiens OX=9606 GN=YWHAH PE=1 SV=4	724		TRUE	653	1155.6	578.807	1155.6	2	0.000876259	0.00175252	1.51522	3.76527	0.00178918	4.60534	0.0024731	24.4661	1	1		1	62.6052	1	Acetyl: 1			CID	/Neuroblastom-Imaging/Imaging-Sample1/ZW_Neuroblastom_E22965-08_3_RA3_01_4008.d/+MS2(578.8080), 31.7eV, 24.5min #5849	ZW_Neuroblastom_E22965-08_3_RA3_01_4008.d	SwissProt-human-oReAlk2019_Mascot_2019-10-14 16:08:34	Protein Search
501.96	0.975549	1503.87	1503.86	25.9 (M.expect:0.0,M.score:25.9)	43 - 56	R.NLLSVAYKNVVGAR.R	119092	1433F_HUMAN	14-3-3 protein eta OS=Homo sapiens OX=9606 GN=YWHAH PE=1 SV=4	1942		TRUE	10231	1502.86	501.96	1502.86	3	0.000489687	0.00146906	0.976856	10.0917	0.00498839	28.6274	0.00818113	41.471	1	1		1	21.892	1				CID	/Neuroblastom-Imaging/Imaging-Sample1/ZW_Neuroblastom_E22965-08_3_RA3_01_4008.d/+MS2(501.9601), 25.0eV, 41.5min #11634	ZW_Neuroblastom_E22965-08_3_RA3_01_4008.d	SwissProt-human-oReAlk2019_Mascot_2019-10-14 16:08:34	Protein Search
454.266	0.703697	907.525	907.525	15.1 (M.expect:0.0,M.score:15.1)	43 - 50	R.NLLSVAYK.N	1073866	1433G_HUMAN	14-3-3 protein gamma OS=Homo sapiens OX=9606 GN=YWHAG PE=1 SV=2	147		TRUE	1767	906.518	454.266	906.517	2	0.000319666	0.000639331	0.704478	2.33703	0.00149119	3.04907	0.00186768	34.1206	2	1		1	37.144	0				CID	/Neuroblastom-Imaging/Imaging-Sample1/ZW_Neuroblastom_E22965-08_3_RA3_01_4008.d/+MS2(454.2663), 25.2eV, 34.1min #9258	ZW_Neuroblastom_E22965-08_3_RA3_01_4008.d	SwissProt-human-oReAlk2019_Mascot_2019-10-14 16:08:34	Protein Search
454.266	0.769737	907.525	907.525	26.2 (M.expect:0.0,M.score:26.2)	43 - 50	R.NLLSVAYK.N	229228	1433G_HUMAN	14-3-3 protein gamma OS=Homo sapiens OX=9606 GN=YWHAG PE=1 SV=2	151		TRUE	8772	906.518	454.266	906.517	2	0.000349666	0.000699331	0.770592	3.56881	0.00194364	16.9673	0.00708237	34.0665	2	1		1	25.7945	0				CID	/Neuroblastom-Imaging/Imaging-Sample1/ZW_Neuroblastom_E22965-08_3_RA3_01_4008.d/+MS2(454.2664), 25.2eV, 34.1min #9238	ZW_Neuroblastom_E22965-08_3_RA3_01_4008.d	SwissProt-human-oReAlk2019_Mascot_2019-10-14 16:08:34	Protein Search
501.96	0.975549	1503.87	1503.86	25.9 (M.expect:0.0,M.score:25.9)	43 - 56	R.NLLSVAYKNVVGAR.R	119092	1433G_HUMAN	14-3-3 protein gamma OS=Homo sapiens OX=9606 GN=YWHAG PE=1 SV=2	1941		TRUE	10231	1502.86	501.96	1502.86	3	0.000489687	0.00146906	0.976856	10.0917	0.00498839	28.6274	0.00818113	41.471	1	1		1	21.892	1				CID	/Neuroblastom-Imaging/Imaging-Sample1/ZW_Neuroblastom_E22965-08_3_RA3_01_4008.d/+MS2(501.9601), 25.0eV, 41.5min #11634	ZW_Neuroblastom_E22965-08_3_RA3_01_4008.d	SwissProt-human-oReAlk2019_Mascot_2019-10-14 16:08:34	Protein Search
822.398	1.08466	1643.79	1643.79	58.8 (M.expect:0.0,M.score:58.8)	29 - 42	K.NVTELNEPLSNEER.N	578670	1433G_HUMAN	14-3-3 protein gamma OS=Homo sapiens OX=9606 GN=YWHAG PE=1 SV=2	2499		TRUE	3251	1642.78	822.397	1642.78	2	0.000892021	0.00178404	1.08532	4.36062	0.00233786	18.4514	0.0145241	31.6716	1	1		1	33.9962	0				CID	/Neuroblastom-Imaging/Imaging-Sample1/ZW_Neuroblastom_E22965-08_3_RA3_01_4008.d/+MS2(822.3981), 46.1eV, 31.7min #8405	ZW_Neuroblastom_E22965-08_3_RA3_01_4008.d	SwissProt-human-oReAlk2019_Mascot_2019-10-14 16:08:34	Protein Search
454.266	0.703697	907.525	907.525	15.1 (M.expect:0.0,M.score:15.1)	42 - 49	R.NLLSVAYK.N	1073866	1433Z_HUMAN	14-3-3 protein zeta/delta OS=Homo sapiens OX=9606 GN=YWHAZ PE=1 SV=1	148		TRUE	1767	906.518	454.266	906.517	2	0.000319666	0.000639331	0.704478	2.33703	0.00149119	3.04907	0.00186768	34.1206	2	1		1	37.144	0				CID	/Neuroblastom-Imaging/Imaging-Sample1/ZW_Neuroblastom_E22965-08_3_RA3_01_4008.d/+MS2(454.2663), 25.2eV, 34.1min #9258	ZW_Neuroblastom_E22965-08_3_RA3_01_4008.d	SwissProt-human-oReAlk2019_Mascot_2019-10-14 16:08:34	Protein Search
454.266	0.769737	907.525	907.525	26.2 (M.expect:0.0,M.score:26.2)	42 - 49	R.NLLSVAYK.N	229228	1433Z_HUMAN	14-3-3 protein zeta/delta OS=Homo sapiens OX=9606 GN=YWHAZ PE=1 SV=1	150		TRUE	8772	906.518	454.266	906.517	2	0.000349666	0.000699331	0.770592	3.56881	0.00194364	16.9673	0.00708237	34.0665	2	1		1	25.7945	0				CID	/Neuroblastom-Imaging/Imaging-Sample1/ZW_Neuroblastom_E22965-08_3_RA3_01_4008.d/+MS2(454.2664), 25.2eV, 34.1min #9238	ZW_Neuroblastom_E22965-08_3_RA3_01_4008.d	SwissProt-human-oReAlk2019_Mascot_2019-10-14 16:08:34	Protein Search
573.796	1.62757	1146.58	1146.58	36.8 (M.expect:0.0,M.score:36.8)	1 - 9	-.MDKNELVQK.A	190834	1433Z_HUMAN	14-3-3 protein zeta/delta OS=Homo sapiens OX=9606 GN=YWHAZ PE=1 SV=1	699		TRUE	5077	1145.58	573.795	1145.58	2	0.000933892	0.00186778	1.629	2.89553	0.00161715	12.8452	0.0107988	25.2586	1	1		1	21.5341	1	Acetyl: 1			CID	/Neuroblastom-Imaging/Imaging-Sample1/ZW_Neuroblastom_E22965-08_3_RA3_01_4008.d/+MS2(573.7957), 31.4eV, 25.3min #6135	ZW_Neuroblastom_E22965-08_3_RA3_01_4008.d	SwissProt-human-oReAlk2019_Mascot_2019-10-14 16:08:34	Protein Search
581.794	2.27983	1162.58	1162.58	20.6 (M.expect:0.0,M.score:20.6)	1 - 9	-.MDKNELVQK.A	206150	1433Z_HUMAN	14-3-3 protein zeta/delta OS=Homo sapiens OX=9606 GN=YWHAZ PE=1 SV=1	743		TRUE	5689	1161.57	581.792	1161.57	2	0.00132639	0.00265278	2.28181	13.2199	0.0111892	30.9076	0.0183296	18.5039	1	1		1	6.93135	1	Acetyl: 1; Oxidation: 1			CID	/Neuroblastom-Imaging/Imaging-Sample1/ZW_Neuroblastom_E22965-08_3_RA3_01_4008.d/+MS2(581.7936), 31.9eV, 18.5min #3648	ZW_Neuroblastom_E22965-08_3_RA3_01_4008.d	SwissProt-human-oReAlk2019_Mascot_2019-10-14 16:08:34	Protein Search
501.96	0.975549	1503.87	1503.86	25.9 (M.expect:0.0,M.score:25.9)	42 - 55	R.NLLSVAYKNVVGAR.R	119092	1433Z_HUMAN	14-3-3 protein zeta/delta OS=Homo sapiens OX=9606 GN=YWHAZ PE=1 SV=1	1940		TRUE	10231	1502.86	501.96	1502.86	3	0.000489687	0.00146906	0.976856	10.0917	0.00498839	28.6274	0.00818113	41.471	1	1		1	21.892	1				CID	/Neuroblastom-Imaging/Imaging-Sample1/ZW_Neuroblastom_E22965-08_3_RA3_01_4008.d/+MS2(501.9601), 25.0eV, 41.5min #11634	ZW_Neuroblastom_E22965-08_3_RA3_01_4008.d	SwissProt-human-oReAlk2019_Mascot_2019-10-14 16:08:34	Protein Search
774.856	-5.93444	1548.7	1548.71	15.4 (M.expect:0.0,M.score:15.4)	28 - 41	K.SVTEQGAELSNEER.N	31876	1433Z_HUMAN	14-3-3 protein zeta/delta OS=Homo sapiens OX=9606 GN=YWHAZ PE=1 SV=1	2102		TRUE	6638	1547.7	774.86	1547.71	2	-0.00459833	-0.00919666	-5.9383	7.62463	0.00754018	10.1584	0.0096036	21.8075	2	1		1	7.02666	0				CID	/Neuroblastom-Imaging/Imaging-Sample1/ZW_Neuroblastom_E22965-08_3_RA3_01_4008.d/+MS2(774.8559), 42.0eV, 21.8min #4847	ZW_Neuroblastom_E22965-08_3_RA3_01_4008.d	SwissProt-human-oReAlk2019_Mascot_2019-10-14 16:08:34	Protein Search
774.861	0.557091	1548.71	1548.71	71.3 (M.expect:0.0,M.score:71.3)	28 - 41	K.SVTEQGAELSNEER.N	342876	1433Z_HUMAN	14-3-3 protein zeta/delta OS=Homo sapiens OX=9606 GN=YWHAZ PE=1 SV=1	2103		TRUE	6152	1547.71	774.86	1547.71	2	0.000431668	0.000863336	0.557453	4.7254	0.00288143	5.41953	0.00338083	21.899	2	1		1	31.4057	0				CID	/Neuroblastom-Imaging/Imaging-Sample1/ZW_Neuroblastom_E22965-08_3_RA3_01_4008.d/+MS2(774.8609), 42.0eV, 21.9min #4876	ZW_Neuroblastom_E22965-08_3_RA3_01_4008.d	SwissProt-human-oReAlk2019_Mascot_2019-10-14 16:08:34	Protein Search
998.469	0.18874	1995.93	1995.93	23.4 (M.expect:0.0,M.score:23.4)	1,252 - 1,270	R.ESGVGQTDWSGVEAGEFLK.S	16088	TB182_HUMAN	182 kDa tankyrase-1-binding protein OS=Homo sapiens OX=9606 GN=TNKS1BP1 PE=1 SV=4	3416		TRUE	12642	1994.92	998.468	1994.92	2	0.000188451	0.000376901	0.188835	16.9534	0.0101881	20.3103	0.013863	52.7829	1	1		1	9.46632	0				CID	/Neuroblastom-Imaging/Imaging-Sample1/ZW_Neuroblastom_E22965-08_3_RA3_01_4008.d/+MS2(998.4685), 54.9eV, 52.8min #14763	ZW_Neuroblastom_E22965-08_3_RA3_01_4008.d	SwissProt-human-oReAlk2019_Mascot_2019-10-14 16:08:34	Protein Search
552.294	-3.02477	1103.58	1103.58	44.4 (M.expect:0.0,M.score:44.4)	2 - 11	M.AAAAVVEFQR.A	18244	PSD11_HUMAN	26S proteasome non-ATPase regulatory subunit 11 OS=Homo sapiens OX=9606 GN=PSMD11 PE=1 SV=3	569		TRUE	11058	1102.57	552.296	1102.58	2	-0.00167056	-0.00334113	-3.02753	4.31312	0.00233006	5.5281	0.0030292	50.5346	1	1		1	32.8323	0	Acetyl: 1			CID	/Neuroblastom-Imaging/Imaging-Sample1/ZW_Neuroblastom_E22965-08_3_RA3_01_4008.d/+MS2(552.2942), 30.1eV, 50.5min #14173	ZW_Neuroblastom_E22965-08_3_RA3_01_4008.d	SwissProt-human-oReAlk2019_Mascot_2019-10-14 16:08:34	Protein Search
655.009	0.4175	1963.01	1963.01	21.7 (M.expect:0.0,M.score:21.7)	2 - 18	M.PLENLEEEGLPKNPDLR.I	28108	PSMD6_HUMAN	26S proteasome non-ATPase regulatory subunit 6 OS=Homo sapiens OX=9606 GN=PSMD6 PE=1 SV=1	3379		TRUE	3592	1962.01	655.009	1962.01	3	0.000273466	0.000820399	0.417928	9.25332	0.00990173	13.2932	0.0137995	39.0153	1	1		1	25.155	1				CID	/Neuroblastom-Imaging/Imaging-Sample1/ZW_Neuroblastom_E22965-08_3_RA3_01_4008.d/+MS2(655.0095), 27.0eV, 39.0min #10887	ZW_Neuroblastom_E22965-08_3_RA3_01_4008.d	SwissProt-human-oReAlk2019_Mascot_2019-10-14 16:08:34	Protein Search
543.296	1.35091	1085.59	1085.58	42.6 (M.expect:0.0,M.score:42.6)	96 - 105	K.VTQLDLDGPK.E	112264	HAP28_HUMAN	28 kDa heat- and acid-stable phosphoprotein OS=Homo sapiens OX=9606 GN=PDAP1 PE=1 SV=1	534		TRUE	7925	1084.58	543.295	1084.58	2	0.000733945	0.00146789	1.35216	5.01217	0.00304855	9.02921	0.00431459	29.59	1	1		1	17.9185	0				CID	/Neuroblastom-Imaging/Imaging-Sample1/ZW_Neuroblastom_E22965-08_3_RA3_01_4008.d/+MS2(543.2962), 29.6eV, 29.6min #7691	ZW_Neuroblastom_E22965-08_3_RA3_01_4008.d	SwissProt-human-oReAlk2019_Mascot_2019-10-14 16:08:34	Protein Search
925.443	-1.31303	1849.88	1849.88	48.4 (M.expect:0.0,M.score:48.4)	16 - 31	R.QYTSPEEIDAQLQAEK.Q	108086	HAP28_HUMAN	28 kDa heat- and acid-stable phosphoprotein OS=Homo sapiens OX=9606 GN=PDAP1 PE=1 SV=1	3073		TRUE	9020	1848.87	925.444	1848.87	2	-0.00121514	-0.00243027	-1.31375	7.03762	0.00725456	17.4018	0.0125665	38.2807	1	1		1	15.4914	0				CID	/Neuroblastom-Imaging/Imaging-Sample1/ZW_Neuroblastom_E22965-08_3_RA3_01_4008.d/+MS2(925.4431), 51.3eV, 38.3min #10646	ZW_Neuroblastom_E22965-08_3_RA3_01_4008.d	SwissProt-human-oReAlk2019_Mascot_2019-10-14 16:08:34	Protein Search
693.012	1.10073	2077.02	2077.02	38.7 (M.expect:0.0,M.score:38.7)	14 - 31	R.ARQYTSPEEIDAQLQAEK.Q	27490	HAP28_HUMAN	28 kDa heat- and acid-stable phosphoprotein OS=Homo sapiens OX=9606 GN=PDAP1 PE=1 SV=1	3528		TRUE	3017	2076.01	693.011	2076.01	3	0.000762819	0.00228846	1.1018	12.0428	0.00618279	35.6583	0.0104909	31.8386	1	1		1	14.2366	1				CID	/Neuroblastom-Imaging/Imaging-Sample1/ZW_Neuroblastom_E22965-08_3_RA3_01_4008.d/+MS2(693.0122), 27.0eV, 31.9min #8474	ZW_Neuroblastom_E22965-08_3_RA3_01_4008.d	SwissProt-human-oReAlk2019_Mascot_2019-10-14 16:08:34	Protein Search
461.288	-1.33945	1381.85	1381.85	20.6 (M.expect:0.0,M.score:20.6)	43 - 55	K.KGLTPSQIGVILR.D	33374	RS13_HUMAN	40S ribosomal protein S13 OS=Homo sapiens OX=9606 GN=RPS13 PE=1 SV=2	1565		TRUE	9529	1380.84	461.289	1380.85	3	-0.000617874	-0.00185362	-1.3414	7.55406	0.00525035	15.5314	0.00849418	38.0859	1	1		1	20.4008	1				CID	/Neuroblastom-Imaging/Imaging-Sample1/ZW_Neuroblastom_E22965-08_3_RA3_01_4008.d/+MS2(461.2884), 24.2eV, 38.1min #10593	ZW_Neuroblastom_E22965-08_3_RA3_01_4008.d	SwissProt-human-oReAlk2019_Mascot_2019-10-14 16:08:34	Protein Search
527.786	1.62971	1054.57	1054.56	48.8 (M.expect:0.0,M.score:48.8)	107 - 117	K.TPGPGAQSALR.A	219570	RS14_HUMAN	40S ribosomal protein S14 OS=Homo sapiens OX=9606 GN=RPS14 PE=1 SV=3	461		TRUE	4057	1053.56	527.786	1053.56	2	0.000860139	0.00172028	1.63127	3.69809	0.0017606	7.11656	0.00278844	19.8457	1	1		1	42.9418	0				CID	/Neuroblastom-Imaging/Imaging-Sample1/ZW_Neuroblastom_E22965-08_3_RA3_01_4008.d/+MS2(527.7865), 28.7eV, 19.8min #4100	ZW_Neuroblastom_E22965-08_3_RA3_01_4008.d	SwissProt-human-oReAlk2019_Mascot_2019-10-14 16:08:34	Protein Search
715.362	-0.0916515	1429.72	1429.72	43.0 (M.expect:0.0,M.score:43.0)	129 - 141	R.IEDVTPIPSDSTR.R	143584	RS14_HUMAN	40S ribosomal protein S14 OS=Homo sapiens OX=9606 GN=RPS14 PE=1 SV=3	1704		TRUE	8755	1428.71	715.362	1428.71	2	-6.5564e-05	-0.000131128	-0.0917161	6.46498	0.00272617	8.23521	0.00401765	34.8032	2	1		1	41.9135	0				CID	/Neuroblastom-Imaging/Imaging-Sample1/ZW_Neuroblastom_E22965-08_3_RA3_01_4008.d/+MS2(715.3620), 34.8eV, 34.8min #9498	ZW_Neuroblastom_E22965-08_3_RA3_01_4008.d	SwissProt-human-oReAlk2019_Mascot_2019-10-14 16:08:34	Protein Search
715.362	0.565358	1429.72	1429.72	54.4 (M.expect:0.0,M.score:54.4)	129 - 141	R.IEDVTPIPSDSTR.R	532314	RS14_HUMAN	40S ribosomal protein S14 OS=Homo sapiens OX=9606 GN=RPS14 PE=1 SV=3	1705		TRUE	1500	1428.71	715.362	1428.71	2	0.000404436	0.000808872	0.565756	2.94133	0.00237946	3.93034	0.00354859	34.8545	2	1		1	57.7945	0				CID	/Neuroblastom-Imaging/Imaging-Sample1/ZW_Neuroblastom_E22965-08_3_RA3_01_4008.d/+MS2(715.3625), 34.8eV, 34.9min #9513	ZW_Neuroblastom_E22965-08_3_RA3_01_4008.d	SwissProt-human-oReAlk2019_Mascot_2019-10-14 16:08:34	Protein Search
529.279	1.95322	1585.82	1585.82	39.3 (M.expect:0.0,M.score:39.3)	129 - 142	R.IEDVTPIPSDSTRR.K	366696	RS14_HUMAN	40S ribosomal protein S14 OS=Homo sapiens OX=9606 GN=RPS14 PE=1 SV=3	2234		TRUE	779	1584.81	529.278	1584.81	3	0.0010338	0.00310139	1.9557	4.69093	0.00278451	11.2464	0.00898081	28.0386	2	1		1	33.0381	1				CID	/Neuroblastom-Imaging/Imaging-Sample1/ZW_Neuroblastom_E22965-08_3_RA3_01_4008.d/+MS2(529.2786), 25.6eV, 28.1min #7157	ZW_Neuroblastom_E22965-08_3_RA3_01_4008.d	SwissProt-human-oReAlk2019_Mascot_2019-10-14 16:08:34	Protein Search
529.279	2.76564	1585.82	1585.82	25.6 (M.expect:0.0,M.score:25.6)	129 - 142	R.IEDVTPIPSDSTRR.K	134376	RS14_HUMAN	40S ribosomal protein S14 OS=Homo sapiens OX=9606 GN=RPS14 PE=1 SV=3	2235		TRUE	5688	1584.82	529.278	1584.81	3	0.0014638	0.00439139	2.76916	4.0308	0.00233767	9.11093	0.00270585	27.9269	2	1		1	28.1731	1				CID	/Neuroblastom-Imaging/Imaging-Sample1/ZW_Neuroblastom_E22965-08_3_RA3_01_4008.d/+MS2(529.2790), 25.6eV, 27.9min #7113	ZW_Neuroblastom_E22965-08_3_RA3_01_4008.d	SwissProt-human-oReAlk2019_Mascot_2019-10-14 16:08:34	Protein Search
487.771	0.302246	974.534	974.534	30.8 (M.expect:0.0,M.score:30.8)	4 - 12	R.MNVLADALK.S	72980	RS15A_HUMAN	40S ribosomal protein S15a OS=Homo sapiens OX=9606 GN=RPS15A PE=1 SV=2	270		TRUE	6982	973.527	487.771	973.527	2	0.000147427	0.000294854	0.302559	14.8136	0.0112389	23.2678	0.0160452	39.6256	1	1		1	19.8194	0				CID	/Neuroblastom-Imaging/Imaging-Sample1/ZW_Neuroblastom_E22965-08_3_RA3_01_4008.d/+MS2(487.7707), 26.5eV, 39.6min #11069	ZW_Neuroblastom_E22965-08_3_RA3_01_4008.d	SwissProt-human-oReAlk2019_Mascot_2019-10-14 16:08:34	Protein Search
470.923	2.31627	1410.76	1410.75	26.6 (M.expect:0.0,M.score:26.6)	34 - 45	K.VNGRPLEMIEPR.T	99706	RS16_HUMAN	40S ribosomal protein S16 OS=Homo sapiens OX=9606 GN=RPS16 PE=1 SV=2	1659		TRUE	9809	1409.75	470.922	1409.74	3	0.00109078	0.00327235	2.31957	26.6335	0.00870245	63.1724	0.0141004	29.741	1	1		1	19.0743	0				CID	/Neuroblastom-Imaging/Imaging-Sample1/ZW_Neuroblastom_E22965-08_3_RA3_01_4008.d/+MS2(470.9233), 24.4eV, 29.7min #7738	ZW_Neuroblastom_E22965-08_3_RA3_01_4008.d	SwissProt-human-oReAlk2019_Mascot_2019-10-14 16:08:34	Protein Search
500.617	1.43103	1499.84	1499.83	20.3 (M.expect:0.0,M.score:20.3)	2 - 15	M.PSKGPLQSVQVFGR.K	96334	RS16_HUMAN	40S ribosomal protein S16 OS=Homo sapiens OX=9606 GN=RPS16 PE=1 SV=2	1927		TRUE	8012	1498.83	500.616	1498.83	3	0.000716396	0.00214919	1.43295	11.9778	0.00445922	26.6175	0.00828934	32.6172	2	1		1	12.9346	1				CID	/Neuroblastom-Imaging/Imaging-Sample1/ZW_Neuroblastom_E22965-08_3_RA3_01_4008.d/+MS2(500.6165), 25.0eV, 32.6min #8747	ZW_Neuroblastom_E22965-08_3_RA3_01_4008.d	SwissProt-human-oReAlk2019_Mascot_2019-10-14 16:08:34	Protein Search
500.617	1.51093	1499.84	1499.83	35.6 (M.expect:0.0,M.score:35.6)	2 - 15	M.PSKGPLQSVQVFGR.K	306674	RS16_HUMAN	40S ribosomal protein S16 OS=Homo sapiens OX=9606 GN=RPS16 PE=1 SV=2	1928		TRUE	3092	1498.83	500.616	1498.83	3	0.000756396	0.00226919	1.51296	6.3991	0.00346577	7.38888	0.00478028	32.7194	2	1		1	17.4977	1				CID	/Neuroblastom-Imaging/Imaging-Sample1/ZW_Neuroblastom_E22965-08_3_RA3_01_4008.d/+MS2(500.6166), 25.0eV, 32.7min #8776	ZW_Neuroblastom_E22965-08_3_RA3_01_4008.d	SwissProt-human-oReAlk2019_Mascot_2019-10-14 16:08:34	Protein Search
474.3	1.19513	947.594	947.592	26.2 (M.expect:0.0,M.score:26.2)	26 - 34	K.IAFAITAIK.G	21200	RS18_HUMAN	40S ribosomal protein S18 OS=Homo sapiens OX=9606 GN=RPS18 PE=1 SV=3	221		TRUE	13111	946.586	474.3	946.585	2	0.000566848	0.0011337	1.1964	11.5407	0.00629212	13.4165	0.00773471	45.0076	1	1		1	10.5947	0				CID	/Neuroblastom-Imaging/Imaging-Sample1/ZW_Neuroblastom_E22965-08_3_RA3_01_4008.d/+MS2(474.3004), 26.0eV, 45.0min #12654	ZW_Neuroblastom_E22965-08_3_RA3_01_4008.d	SwissProt-human-oReAlk2019_Mascot_2019-10-14 16:08:34	Protein Search
544.297	-5.82163	1087.59	1087.59	14.0 (M.expect:0.0,M.score:14.0)	67 - 75	R.VITIMQNPR.Q	55444	RS18_HUMAN	40S ribosomal protein S18 OS=Homo sapiens OX=9606 GN=RPS18 PE=1 SV=3	542		TRUE	1920	1086.58	544.3	1086.59	2	-0.00316869	-0.00633739	-5.82702	2.81849	0.000864054	4.07234	0.00178387	22.693	1	1		1	7.8175	0	Oxidation: 5			CID	/Neuroblastom-Imaging/Imaging-Sample1/ZW_Neuroblastom_E22965-08_3_RA3_01_4008.d/+MS2(544.2969), 29.7eV, 22.7min #5193	ZW_Neuroblastom_E22965-08_3_RA3_01_4008.d	SwissProt-human-oReAlk2019_Mascot_2019-10-14 16:08:34	Protein Search
624.293	2.3243	1247.58	1247.58	40.2 (M.expect:0.0,M.score:40.2)	56 - 66	R.AGELTEDEVER.V	302460	RS18_HUMAN	40S ribosomal protein S18 OS=Homo sapiens OX=9606 GN=RPS18 PE=1 SV=3	1020		TRUE	2798	1246.57	624.291	1246.57	2	0.00145104	0.00290208	2.32617	8.4792	0.00722917	10.5396	0.0104824	22.6386	1	1		1	33.4495	0				CID	/Neuroblastom-Imaging/Imaging-Sample1/ZW_Neuroblastom_E22965-08_3_RA3_01_4008.d/+MS2(624.2926), 33.0eV, 22.6min #5168	ZW_Neuroblastom_E22965-08_3_RA3_01_4008.d	SwissProt-human-oReAlk2019_Mascot_2019-10-14 16:08:34	Protein Search
493.93	1.67817	1479.78	1479.77	31.2 (M.expect:0.0,M.score:31.2)	76 - 86	R.QYKIPDWFLNR.Q	71986	RS18_HUMAN	40S ribosomal protein S18 OS=Homo sapiens OX=9606 GN=RPS18 PE=1 SV=3	1871		TRUE	12024	1478.77	493.93	1478.77	3	0.0008289	0.0024867	1.68046	11.37	0.00690416	20.0948	0.0125314	47.9611	1	1		1	27.9528	1				CID	/Neuroblastom-Imaging/Imaging-Sample1/ZW_Neuroblastom_E22965-08_3_RA3_01_4008.d/+MS2(493.9304), 24.9eV, 48.0min #13470	ZW_Neuroblastom_E22965-08_3_RA3_01_4008.d	SwissProt-human-oReAlk2019_Mascot_2019-10-14 16:08:34	Protein Search
541.319	0.55939	1621.94	1621.94	34.4 (M.expect:0.0,M.score:34.4)	2 - 14	M.SLVIPEKFQHILR.V	105482	RS18_HUMAN	40S ribosomal protein S18 OS=Homo sapiens OX=9606 GN=RPS18 PE=1 SV=3	2413		TRUE	12030	1620.94	541.319	1620.94	3	0.000302808	0.000908425	0.560085	6.42869	0.00347828	7.51656	0.00564961	52.0105	2	1		1	39.7504	1	Acetyl: 1			CID	/Neuroblastom-Imaging/Imaging-Sample1/ZW_Neuroblastom_E22965-08_3_RA3_01_4008.d/+MS2(541.3193), 25.8eV, 52.0min #14550	ZW_Neuroblastom_E22965-08_3_RA3_01_4008.d	SwissProt-human-oReAlk2019_Mascot_2019-10-14 16:08:34	Protein Search
541.319	0.799544	1621.94	1621.94	45.2 (M.expect:0.0,M.score:45.2)	2 - 14	M.SLVIPEKFQHILR.V	46216	RS18_HUMAN	40S ribosomal protein S18 OS=Homo sapiens OX=9606 GN=RPS18 PE=1 SV=3	2414		TRUE	8119	1620.94	541.319	1620.94	3	0.000432808	0.00129843	0.800537	3.83857	0.00223007	5.16713	0.00402526	51.8939	2	1		1	42.9475	1	Acetyl: 1			CID	/Neuroblastom-Imaging/Imaging-Sample1/ZW_Neuroblastom_E22965-08_3_RA3_01_4008.d/+MS2(541.3194), 25.8eV, 51.9min #14514	ZW_Neuroblastom_E22965-08_3_RA3_01_4008.d	SwissProt-human-oReAlk2019_Mascot_2019-10-14 16:08:34	Protein Search
367.235	1.76475	733.462	733.461	23.1 (M.expect:0.0,M.score:23.1)	17 - 23	R.ALAAFLK.K	41612	RS19_HUMAN	40S ribosomal protein S19 OS=Homo sapiens OX=9606 GN=RPS19 PE=1 SV=2	15		TRUE	14692	732.455	367.234	732.453	2	0.000648076	0.00129615	1.76717	4.51455	0.00197604	5.14731	0.00234857	34.8664	1	1		1	33.5021	0				CID	/Neuroblastom-Imaging/Imaging-Sample1/ZW_Neuroblastom_E22965-08_3_RA3_01_4008.d/+MS2(367.2346), 23.0eV, 34.9min #9525	ZW_Neuroblastom_E22965-08_3_RA3_01_4008.d	SwissProt-human-oReAlk2019_Mascot_2019-10-14 16:08:34	Protein Search
485.801	1.32299	970.594	970.593	27.0 (M.expect:0.0,M.score:27.0)	103 - 111	R.VLQALEGLK.M	269862	RS19_HUMAN	40S ribosomal protein S19 OS=Homo sapiens OX=9606 GN=RPS19 PE=1 SV=2	258		TRUE	5735	969.587	485.8	969.586	2	0.000642708	0.00128542	1.32436	4.97318	0.00272001	33.5454	0.0116205	36.1019	1	1		1	24.961	0				CID	/Neuroblastom-Imaging/Imaging-Sample1/ZW_Neuroblastom_E22965-08_3_RA3_01_4008.d/+MS2(485.8009), 26.4eV, 36.1min #9925	ZW_Neuroblastom_E22965-08_3_RA3_01_4008.d	SwissProt-human-oReAlk2019_Mascot_2019-10-14 16:08:34	Protein Search
567.781	0.872726	1134.55	1134.55	15.2 (M.expect:0.0,M.score:15.2)	8 - 16	K.DVNQQEFVR.A	712282	RS19_HUMAN	40S ribosomal protein S19 OS=Homo sapiens OX=9606 GN=RPS19 PE=1 SV=2	660		TRUE	369	1133.55	567.781	1133.55	2	0.000495517	0.000991034	0.873501	5.93241	0.00293629	7.33206	0.00390209	26.1991	1	1		1	10.5252	0				CID	/Neuroblastom-Imaging/Imaging-Sample1/ZW_Neuroblastom_E22965-08_3_RA3_01_4008.d/+MS2(567.7810), 31.1eV, 26.2min #6473	ZW_Neuroblastom_E22965-08_3_RA3_01_4008.d	SwissProt-human-oReAlk2019_Mascot_2019-10-14 16:08:34	Protein Search
852.388	-0.369157	1703.77	1703.77	38.6 (M.expect:0.0,M.score:38.6)	44 - 56	K.ELAPYDENWFYTR.A	76084	RS19_HUMAN	40S ribosomal protein S19 OS=Homo sapiens OX=9606 GN=RPS19 PE=1 SV=2	2693		TRUE	11393	1702.76	852.389	1702.76	2	-0.000314665	-0.000629331	-0.369376	9.65277	0.00873831	19.444	0.0109487	53.981	1	1		1	19.1416	0				CID	/Neuroblastom-Imaging/Imaging-Sample1/ZW_Neuroblastom_E22965-08_3_RA3_01_4008.d/+MS2(852.3883), 47.6eV, 54.0min #15083	ZW_Neuroblastom_E22965-08_3_RA3_01_4008.d	SwissProt-human-oReAlk2019_Mascot_2019-10-14 16:08:34	Protein Search
492.988	2.23276	1968.93	1968.92	17.1 (M.expect:0.0,M.score:17.1)	42 - 56	K.HKELAPYDENWFYTR.A	158306	RS19_HUMAN	40S ribosomal protein S19 OS=Homo sapiens OX=9606 GN=RPS19 PE=1 SV=2	3388		TRUE	10214	1967.92	492.986	1967.92	4	0.00110072	0.00440288	2.23618	6.51473	0.00519815	9.91477	0.00637961	37.4995	1	1		1	14.6495	1				CID	/Neuroblastom-Imaging/Imaging-Sample1/ZW_Neuroblastom_E22965-08_3_RA3_01_4008.d/+MS2(492.9875), 24.9eV, 37.5min #10392	ZW_Neuroblastom_E22965-08_3_RA3_01_4008.d	SwissProt-human-oReAlk2019_Mascot_2019-10-14 16:08:34	Protein Search
513.302	-1.33279	1025.6	1025.6	40.4 (M.expect:0.0,M.score:40.4)	201 - 211	R.GTGIVSAPVPK.K	41490	RS2_HUMAN	40S ribosomal protein S2 OS=Homo sapiens OX=9606 GN=RPS2 PE=1 SV=2	383		TRUE	2589	1024.59	513.303	1024.59	2	-0.000684122	-0.00136824	-1.33409	16.9426	0.00549174	30.6481	0.0103324	28.5008	2	1		1	13.847	0				CID	/Neuroblastom-Imaging/Imaging-Sample1/ZW_Neuroblastom_E22965-08_3_RA3_01_4008.d/+MS2(513.3024), 27.8eV, 28.5min #7323	ZW_Neuroblastom_E22965-08_3_RA3_01_4008.d	SwissProt-human-oReAlk2019_Mascot_2019-10-14 16:08:34	Protein Search
513.304	1.10242	1025.6	1025.6	34.7 (M.expect:0.0,M.score:34.7)	201 - 211	R.GTGIVSAPVPK.K	197856	RS2_HUMAN	40S ribosomal protein S2 OS=Homo sapiens OX=9606 GN=RPS2 PE=1 SV=2	384		TRUE	6832	1024.59	513.303	1024.59	2	0.000565878	0.00113176	1.10351	11.4792	0.00545475	14.0423	0.00694709	28.5467	2	1		1	29.0931	0				CID	/Neuroblastom-Imaging/Imaging-Sample1/ZW_Neuroblastom_E22965-08_3_RA3_01_4008.d/+MS2(513.3037), 27.8eV, 28.5min #7335	ZW_Neuroblastom_E22965-08_3_RA3_01_4008.d	SwissProt-human-oReAlk2019_Mascot_2019-10-14 16:08:34	Protein Search
693.85	-1.2761	1386.69	1386.69	45.1 (M.expect:0.0,M.score:45.1)	247 - 257	K.TYSYLTPDLWK.E	63666	RS2_HUMAN	40S ribosomal protein S2 OS=Homo sapiens OX=9606 GN=RPS2 PE=1 SV=2	1579		TRUE	9506	1385.68	693.851	1385.69	2	-0.000885421	-0.00177084	-1.27703	4.39207	0.00257488	5.94839	0.00563278	52.0136	2	1		1	28.1408	0				CID	/Neuroblastom-Imaging/Imaging-Sample1/ZW_Neuroblastom_E22965-08_3_RA3_01_4008.d/+MS2(693.8497), 33.0eV, 52.0min #14553	ZW_Neuroblastom_E22965-08_3_RA3_01_4008.d	SwissProt-human-oReAlk2019_Mascot_2019-10-14 16:08:34	Protein Search
693.851	0.75604	1386.7	1386.69	30.5 (M.expect:0.0,M.score:30.5)	247 - 257	K.TYSYLTPDLWK.E	23480	RS2_HUMAN	40S ribosomal protein S2 OS=Homo sapiens OX=9606 GN=RPS2 PE=1 SV=2	1580		TRUE	10189	1385.69	693.851	1385.69	2	0.000524579	0.00104916	0.756589	5.15426	0.00375569	10.9448	0.00483104	51.9508	2	1		1	20.3801	0				CID	/Neuroblastom-Imaging/Imaging-Sample1/ZW_Neuroblastom_E22965-08_3_RA3_01_4008.d/+MS2(693.8512), 33.0eV, 52.0min #14530	ZW_Neuroblastom_E22965-08_3_RA3_01_4008.d	SwissProt-human-oReAlk2019_Mascot_2019-10-14 16:08:34	Protein Search
416.562	-1.41228	1247.67	1247.67	13.2 (M.expect:0.0,M.score:13.2)	9 - 19	K.TPVEPEVAIHR.I	65676	RS20_HUMAN	40S ribosomal protein S20 OS=Homo sapiens OX=9606 GN=RPS20 PE=1 SV=1	1021		TRUE	7718	1246.67	416.563	1246.67	3	-0.000588301	-0.0017649	-1.41456	8.86395	0.00385476	10.2905	0.00503469	24.6832	1	1		1	8.16982	0				CID	/Neuroblastom-Imaging/Imaging-Sample1/ZW_Neuroblastom_E22965-08_3_RA3_01_4008.d/+MS2(416.5624), 23.3eV, 24.7min #5936	ZW_Neuroblastom_E22965-08_3_RA3_01_4008.d	SwissProt-human-oReAlk2019_Mascot_2019-10-14 16:08:34	Protein Search
906.415	-2.72115	1811.82	1811.83	45.8 (M.expect:0.0,M.score:45.8)	1 - 15	-.MQNDAGEFVDLYVPR.K	19438	RS21_HUMAN	40S ribosomal protein S21 OS=Homo sapiens OX=9606 GN=RPS21 PE=1 SV=1	3010		TRUE	14060	1810.81	906.417	1810.82	2	-0.00246649	-0.00493297	-2.72266	7.44881	0.00410088	14.9708	0.0105713	64.3045	6	1		1	19.352	0	Acetyl: 1; Oxidation: 1			CID	/Neuroblastom-Imaging/Imaging-Sample1/ZW_Neuroblastom_E22965-08_3_RA3_01_4008.d/+MS2(906.4146), 50.3eV, 64.3min #17582	ZW_Neuroblastom_E22965-08_3_RA3_01_4008.d	SwissProt-human-oReAlk2019_Mascot_2019-10-14 16:08:34	Protein Search
906.416	-1.71719	1811.82	1811.83	47.9 (M.expect:0.0,M.score:47.9)	1 - 15	-.MQNDAGEFVDLYVPR.K	11522	RS21_HUMAN	40S ribosomal protein S21 OS=Homo sapiens OX=9606 GN=RPS21 PE=1 SV=1	3011		TRUE	13412	1810.82	906.417	1810.82	2	-0.00155649	-0.00311297	-1.71814	8.78828	0.0069894	9.57796	0.00887245	64.1458	6	1		1	16.3272	0	Acetyl: 1; Oxidation: 1			CID	/Neuroblastom-Imaging/Imaging-Sample1/ZW_Neuroblastom_E22965-08_3_RA3_01_4008.d/+MS2(906.4155), 50.3eV, 64.2min #17549	ZW_Neuroblastom_E22965-08_3_RA3_01_4008.d	SwissProt-human-oReAlk2019_Mascot_2019-10-14 16:08:34	Protein Search
906.416	-1.02214	1811.83	1811.83	65.3 (M.expect:0.0,M.score:65.3)	1 - 15	-.MQNDAGEFVDLYVPR.K	34904	RS21_HUMAN	40S ribosomal protein S21 OS=Homo sapiens OX=9606 GN=RPS21 PE=1 SV=1	3012		TRUE	12666	1810.82	906.417	1810.82	2	-0.000926487	-0.00185297	-1.02271	9.31103	0.00833932	19.0076	0.0130714	64.235	6	1		1	21.5758	0	Acetyl: 1; Oxidation: 1			CID	/Neuroblastom-Imaging/Imaging-Sample1/ZW_Neuroblastom_E22965-08_3_RA3_01_4008.d/+MS2(906.4161), 50.3eV, 64.2min #17567	ZW_Neuroblastom_E22965-08_3_RA3_01_4008.d	SwissProt-human-oReAlk2019_Mascot_2019-10-14 16:08:34	Protein Search
906.416	-0.856656	1811.83	1811.83	45.5 (M.expect:0.0,M.score:45.5)	1 - 15	-.MQNDAGEFVDLYVPR.K	30624	RS21_HUMAN	40S ribosomal protein S21 OS=Homo sapiens OX=9606 GN=RPS21 PE=1 SV=1	3013		TRUE	13280	1810.82	906.417	1810.82	2	-0.000776487	-0.00155297	-0.857133	23.4203	0.013137	29.4887	0.0181908	64.261	6	1		1	20.8844	0	Acetyl: 1; Oxidation: 1			CID	/Neuroblastom-Imaging/Imaging-Sample1/ZW_Neuroblastom_E22965-08_3_RA3_01_4008.d/+MS2(906.4163), 50.3eV, 64.3min #17573	ZW_Neuroblastom_E22965-08_3_RA3_01_4008.d	SwissProt-human-oReAlk2019_Mascot_2019-10-14 16:08:34	Protein Search
906.416	-0.757364	1811.83	1811.83	49.2 (M.expect:0.0,M.score:49.2)	1 - 15	-.MQNDAGEFVDLYVPR.K	33046	RS21_HUMAN	40S ribosomal protein S21 OS=Homo sapiens OX=9606 GN=RPS21 PE=1 SV=1	3014		TRUE	12793	1810.82	906.417	1810.82	2	-0.000686487	-0.00137297	-0.757785	16.1351	0.00869862	21.0645	0.0121336	64.1878	6	1		1	21.6178	0	Acetyl: 1; Oxidation: 1			CID	/Neuroblastom-Imaging/Imaging-Sample1/ZW_Neuroblastom_E22965-08_3_RA3_01_4008.d/+MS2(906.4164), 50.3eV, 64.2min #17558	ZW_Neuroblastom_E22965-08_3_RA3_01_4008.d	SwissProt-human-oReAlk2019_Mascot_2019-10-14 16:08:34	Protein Search
906.417	-0.150579	1811.83	1811.83	40.4 (M.expect:0.0,M.score:40.4)	1 - 15	-.MQNDAGEFVDLYVPR.K	11230	RS21_HUMAN	40S ribosomal protein S21 OS=Homo sapiens OX=9606 GN=RPS21 PE=1 SV=1	3015		TRUE	14518	1810.82	906.417	1810.82	2	-0.000136487	-0.000272974	-0.150663	11.2377	0.00886843	20.83	0.010788	64.355	6	1		1	12.244	0	Acetyl: 1; Oxidation: 1			CID	/Neuroblastom-Imaging/Imaging-Sample1/ZW_Neuroblastom_E22965-08_3_RA3_01_4008.d/+MS2(906.4169), 50.3eV, 64.4min #17593	ZW_Neuroblastom_E22965-08_3_RA3_01_4008.d	SwissProt-human-oReAlk2019_Mascot_2019-10-14 16:08:34	Protein Search
962.464	-3.62663	1923.92	1923.93	13.4 (M.expect:0.0,M.score:13.4)	1 - 16	-.MQNDAGEFVDLYVPRK.C	11424	RS21_HUMAN	40S ribosomal protein S21 OS=Homo sapiens OX=9606 GN=RPS21 PE=1 SV=1	3212		TRUE	14488	1922.91	962.467	1922.92	2	-0.0034905	-0.00698099	-3.62853	7.08993	0.00476259	8.22807	0.00559247	56.4964	1	1		1	13.5249	1	Acetyl: 1			CID	/Neuroblastom-Imaging/Imaging-Sample1/ZW_Neuroblastom_E22965-08_3_RA3_01_4008.d/+MS2(962.4636), 53.1eV, 56.5min #15759	ZW_Neuroblastom_E22965-08_3_RA3_01_4008.d	SwissProt-human-oReAlk2019_Mascot_2019-10-14 16:08:34	Protein Search
496.248	0.681566	991.488	991.488	51.6 (M.expect:0.0,M.score:51.6)	1 - 8	-.MNDTVTIR.T	57476	RS24_HUMAN	40S ribosomal protein S24 OS=Homo sapiens OX=9606 GN=RPS24 PE=1 SV=1	317		TRUE	7424	990.481	496.247	990.48	2	0.000338226	0.000676451	0.682258	4.87842	0.00218275	13.0503	0.00629345	40.3499	1	1		1	22.4018	0	Acetyl: 1			CID	/Neuroblastom-Imaging/Imaging-Sample1/ZW_Neuroblastom_E22965-08_3_RA3_01_4008.d/+MS2(496.2478), 26.8eV, 40.4min #11304	ZW_Neuroblastom_E22965-08_3_RA3_01_4008.d	SwissProt-human-oReAlk2019_Mascot_2019-10-14 16:08:34	Protein Search
504.246	2.97617	1007.49	1007.48	32.7 (M.expect:0.0,M.score:32.7)	1 - 8	-.MNDTVTIR.T	55182	RS24_HUMAN	40S ribosomal protein S24 OS=Homo sapiens OX=9606 GN=RPS24 PE=1 SV=1	352		TRUE	4588	1006.48	504.245	1006.48	2	0.00150073	0.00300145	2.97915	2.95596	0.000946581	9.81962	0.00390023	29.8484	1	1		1	14.0706	0	Acetyl: 1; Oxidation: 1			CID	/Neuroblastom-Imaging/Imaging-Sample1/ZW_Neuroblastom_E22965-08_3_RA3_01_4008.d/+MS2(504.2464), 27.3eV, 29.9min #7775	ZW_Neuroblastom_E22965-08_3_RA3_01_4008.d	SwissProt-human-oReAlk2019_Mascot_2019-10-14 16:08:34	Protein Search
486.79	0.863675	972.573	972.572	38.0 (M.expect:0.0,M.score:38.0)	86 - 94	R.AALQELLSK.G	121656	RS25_HUMAN	40S ribosomal protein S25 OS=Homo sapiens OX=9606 GN=RPS25 PE=1 SV=1	265		TRUE	10570	971.566	486.79	971.565	2	0.000420429	0.000840857	0.86457	4.99034	0.00219836	6.01666	0.00385215	37.2947	1	1		1	15.4452	0				CID	/Neuroblastom-Imaging/Imaging-Sample1/ZW_Neuroblastom_E22965-08_3_RA3_01_4008.d/+MS2(486.7903), 26.5eV, 37.3min #10322	ZW_Neuroblastom_E22965-08_3_RA3_01_4008.d	SwissProt-human-oReAlk2019_Mascot_2019-10-14 16:08:34	Protein Search
538.309	-3.99242	1075.61	1075.61	20.0 (M.expect:0.0,M.score:20.0)	44 - 52	K.LNNLVLFDK.A	21934	RS25_HUMAN	40S ribosomal protein S25 OS=Homo sapiens OX=9606 GN=RPS25 PE=1 SV=1	508		TRUE	7732	1074.6	538.311	1074.61	2	-0.00214915	-0.00429831	-3.99616	15.9	0.00733747	22.2997	0.0115327	43.4894	1	1		1	10.4557	0				CID	/Neuroblastom-Imaging/Imaging-Sample1/ZW_Neuroblastom_E22965-08_3_RA3_01_4008.d/+MS2(538.3088), 29.3eV, 43.5min #12229	ZW_Neuroblastom_E22965-08_3_RA3_01_4008.d	SwissProt-human-oReAlk2019_Mascot_2019-10-14 16:08:34	Protein Search
542.821	-1.42039	1084.63	1084.64	18.0 (M.expect:0.0,M.score:18.0)	67 - 76	K.LITPAVVSER.L	353910	RS25_HUMAN	40S ribosomal protein S25 OS=Homo sapiens OX=9606 GN=RPS25 PE=1 SV=1	532		TRUE	3739	1083.63	542.822	1083.63	2	-0.000771016	-0.00154203	-1.42171	4.79661	0.001863	8.20371	0.00686327	34.0168	1	1		1	26.9846	0				CID	/Neuroblastom-Imaging/Imaging-Sample1/ZW_Neuroblastom_E22965-08_3_RA3_01_4008.d/+MS2(542.8209), 29.6eV, 34.0min #9223	ZW_Neuroblastom_E22965-08_3_RA3_01_4008.d	SwissProt-human-oReAlk2019_Mascot_2019-10-14 16:08:34	Protein Search
440.251	1.43039	1318.74	1318.74	13.9 (M.expect:0.0,M.score:13.9)	42 - 52	R.DKLNNLVLFDK.A	66316	RS25_HUMAN	40S ribosomal protein S25 OS=Homo sapiens OX=9606 GN=RPS25 PE=1 SV=1	1314		TRUE	14041	1317.73	440.25	1317.73	3	0.00062973	0.00188919	1.43257	7.32401	0.00339495	8.41765	0.0041692	41.4735	1	1		1	12.0857	1				CID	/Neuroblastom-Imaging/Imaging-Sample1/ZW_Neuroblastom_E22965-08_3_RA3_01_4008.d/+MS2(440.2510), 23.8eV, 41.5min #11637	ZW_Neuroblastom_E22965-08_3_RA3_01_4008.d	SwissProt-human-oReAlk2019_Mascot_2019-10-14 16:08:34	Protein Search
550.24	0.938588	1099.47	1099.47	52.1 (M.expect:0.0,M.score:52.1)	32 - 40	R.VEFMDDTSR.S	295530	RS28_HUMAN	40S ribosomal protein S28 OS=Homo sapiens OX=9606 GN=RPS28 PE=1 SV=1	562		TRUE	3545	1098.47	550.24	1098.47	2	0.000516449	0.0010329	0.939448	5.08645	0.00184051	5.77588	0.00215363	28.2841	1	1		1	34.6034	0				CID	/Neuroblastom-Imaging/Imaging-Sample1/ZW_Neuroblastom_E22965-08_3_RA3_01_4008.d/+MS2(550.2404), 30.0eV, 28.3min #7242	ZW_Neuroblastom_E22965-08_3_RA3_01_4008.d	SwissProt-human-oReAlk2019_Mascot_2019-10-14 16:08:34	Protein Search
680.85	-1.44481	1360.69	1360.7	36.2 (M.expect:0.0,M.score:36.2)	52 - 63	R.EGDVLTLLESER.E	39624	RS28_HUMAN	40S ribosomal protein S28 OS=Homo sapiens OX=9606 GN=RPS28 PE=1 SV=1	1479		TRUE	11443	1359.69	680.851	1359.69	2	-0.000983702	-0.0019674	-1.44588	4.40635	0.00268366	62.8986	0.0120134	54.4088	7	1		1	24.1108	0				CID	/Neuroblastom-Imaging/Imaging-Sample1/ZW_Neuroblastom_E22965-08_3_RA3_01_4008.d/+MS2(680.8504), 33.0eV, 54.4min #15212	ZW_Neuroblastom_E22965-08_3_RA3_01_4008.d	SwissProt-human-oReAlk2019_Mascot_2019-10-14 16:08:34	Protein Search
680.851	-1.16575	1360.69	1360.7	52.1 (M.expect:0.0,M.score:52.1)	52 - 63	R.EGDVLTLLESER.E	69130	RS28_HUMAN	40S ribosomal protein S28 OS=Homo sapiens OX=9606 GN=RPS28 PE=1 SV=1	1480		TRUE	12488	1359.69	680.851	1359.69	2	-0.000793702	-0.0015874	-1.16661	8.24607	0.00774602	55.8309	0.0127241	54.3607	7	1		1	35.8032	0				CID	/Neuroblastom-Imaging/Imaging-Sample1/ZW_Neuroblastom_E22965-08_3_RA3_01_4008.d/+MS2(680.8506), 33.0eV, 54.4min #15197	ZW_Neuroblastom_E22965-08_3_RA3_01_4008.d	SwissProt-human-oReAlk2019_Mascot_2019-10-14 16:08:34	Protein Search
680.851	-1.03356	1360.69	1360.7	70.6 (M.expect:0.0,M.score:70.6)	52 - 63	R.EGDVLTLLESER.E	480748	RS28_HUMAN	40S ribosomal protein S28 OS=Homo sapiens OX=9606 GN=RPS28 PE=1 SV=1	1481		TRUE	3557	1359.69	680.851	1359.69	2	-0.000703702	-0.0014074	-1.03433	5.27746	0.00456577	43.6107	0.00996692	54.0828	7	1		1	44.6452	0				CID	/Neuroblastom-Imaging/Imaging-Sample1/ZW_Neuroblastom_E22965-08_3_RA3_01_4008.d/+MS2(680.8507), 33.0eV, 54.1min #15108	ZW_Neuroblastom_E22965-08_3_RA3_01_4008.d	SwissProt-human-oReAlk2019_Mascot_2019-10-14 16:08:34	Protein Search
680.851	-1.00419	1360.69	1360.7	81.6 (M.expect:0.0,M.score:81.6)	52 - 63	R.EGDVLTLLESER.E	649084	RS28_HUMAN	40S ribosomal protein S28 OS=Homo sapiens OX=9606 GN=RPS28 PE=1 SV=1	1482		TRUE	6183	1359.69	680.851	1359.69	2	-0.000683702	-0.0013674	-1.00493	1.89973	0.00127462	47.5558	0.0105455	54.1497	7	1		1	51.9654	0				CID	/Neuroblastom-Imaging/Imaging-Sample1/ZW_Neuroblastom_E22965-08_3_RA3_01_4008.d/+MS2(680.8507), 33.0eV, 54.2min #15130	ZW_Neuroblastom_E22965-08_3_RA3_01_4008.d	SwissProt-human-oReAlk2019_Mascot_2019-10-14 16:08:34	Protein Search
680.851	-0.960126	1360.69	1360.7	47.9 (M.expect:0.0,M.score:47.9)	52 - 63	R.EGDVLTLLESER.E	120788	RS28_HUMAN	40S ribosomal protein S28 OS=Homo sapiens OX=9606 GN=RPS28 PE=1 SV=1	1483		TRUE	13369	1359.69	680.851	1359.69	2	-0.000653702	-0.0013074	-0.960836	4.87564	0.00230361	21.9766	0.00457928	54.3072	7	1		1	33.2229	0				CID	/Neuroblastom-Imaging/Imaging-Sample1/ZW_Neuroblastom_E22965-08_3_RA3_01_4008.d/+MS2(680.8507), 33.0eV, 54.3min #15179	ZW_Neuroblastom_E22965-08_3_RA3_01_4008.d	SwissProt-human-oReAlk2019_Mascot_2019-10-14 16:08:34	Protein Search
680.851	-0.872	1360.69	1360.7	52.0 (M.expect:0.0,M.score:52.0)	52 - 63	R.EGDVLTLLESER.E	231186	RS28_HUMAN	40S ribosomal protein S28 OS=Homo sapiens OX=9606 GN=RPS28 PE=1 SV=1	1484		TRUE	12076	1359.69	680.851	1359.69	2	-0.000593702	-0.0011874	-0.872646	9.36476	0.0057924	10.5463	0.00784267	54.2521	7	1		1	40.4609	0				CID	/Neuroblastom-Imaging/Imaging-Sample1/ZW_Neuroblastom_E22965-08_3_RA3_01_4008.d/+MS2(680.8508), 33.0eV, 54.3min #15160	ZW_Neuroblastom_E22965-08_3_RA3_01_4008.d	SwissProt-human-oReAlk2019_Mascot_2019-10-14 16:08:34	Protein Search
680.851	-0.592938	1360.69	1360.7	68.2 (M.expect:0.0,M.score:68.2)	52 - 63	R.EGDVLTLLESER.E	136832	RS28_HUMAN	40S ribosomal protein S28 OS=Homo sapiens OX=9606 GN=RPS28 PE=1 SV=1	1485		TRUE	9719	1359.69	680.851	1359.69	2	-0.000403702	-0.000807404	-0.593377	8.35676	0.00329044	14.0126	0.00451378	54.0314	7	1		1	41.731	0				CID	/Neuroblastom-Imaging/Imaging-Sample1/ZW_Neuroblastom_E22965-08_3_RA3_01_4008.d/+MS2(680.8510), 33.0eV, 54.0min #15095	ZW_Neuroblastom_E22965-08_3_RA3_01_4008.d	SwissProt-human-oReAlk2019_Mascot_2019-10-14 16:08:34	Protein Search
590.651	0.385802	1769.94	1769.94	37.7 (M.expect:0.0,M.score:37.7)	48 - 63	K.GPVREGDVLTLLESER.E	113250	RS28_HUMAN	40S ribosomal protein S28 OS=Homo sapiens OX=9606 GN=RPS28 PE=1 SV=1	2916		TRUE	10296	1768.93	590.651	1768.93	3	0.000227875	0.000683624	0.386241	4.49331	0.00358347	6.51227	0.00652841	47.2942	1	1		1	27.6603	1				CID	/Neuroblastom-Imaging/Imaging-Sample1/ZW_Neuroblastom_E22965-08_3_RA3_01_4008.d/+MS2(590.6515), 26.8eV, 47.3min #13291	ZW_Neuroblastom_E22965-08_3_RA3_01_4008.d	SwissProt-human-oReAlk2019_Mascot_2019-10-14 16:08:34	Protein Search
735.888	0.385692	1470.77	1470.77	31.7 (M.expect:0.0,M.score:31.7)	215 - 227	K.DEILPTTPISEQK.G	337886	RS3_HUMAN	40S ribosomal protein S3 OS=Homo sapiens OX=9606 GN=RPS3 PE=1 SV=2	1819		TRUE	6709	1469.76	735.888	1469.76	2	0.000283826	0.000567653	0.385956	2.95992	0.00236188	5.05655	0.00281246	43.3193	1	1		1	53.8077	0				CID	/Neuroblastom-Imaging/Imaging-Sample1/ZW_Neuroblastom_E22965-08_3_RA3_01_4008.d/+MS2(735.8882), 37.3eV, 43.3min #12173	ZW_Neuroblastom_E22965-08_3_RA3_01_4008.d	SwissProt-human-oReAlk2019_Mascot_2019-10-14 16:08:34	Protein Search
787.406	0.478567	1573.81	1573.8	22.9 (M.expect:0.0,M.score:22.9)	228 - 243	K.GGKPEPPAMPQPVPTA.-	322624	RS3_HUMAN	40S ribosomal protein S3 OS=Homo sapiens OX=9606 GN=RPS3 PE=1 SV=2	2206		TRUE	6609	1572.8	787.406	1572.8	2	0.000376826	0.000753653	0.478873	3.75601	0.00238151	6.1433	0.00650575	36.2051	1	1		1	33.8348	0				CID	/Neuroblastom-Imaging/Imaging-Sample1/ZW_Neuroblastom_E22965-08_3_RA3_01_4008.d/+MS2(787.4062), 43.5eV, 36.2min #9964	ZW_Neuroblastom_E22965-08_3_RA3_01_4008.d	SwissProt-human-oReAlk2019_Mascot_2019-10-14 16:08:34	Protein Search
554.313	-0.77906	1107.62	1107.62	52.9 (M.expect:0.0,M.score:52.9)	42 - 51	R.FVNVVPTFGK.K	99318	RS30_HUMAN	40S ribosomal protein S30 OS=Homo sapiens OX=9606 GN=FAU PE=1 SV=1	587		TRUE	10152	1106.61	554.313	1106.61	2	-0.000431843	-0.000863686	-0.779768	10.1869	0.00570536	19.8968	0.0111324	44.9517	1	1		1	19.1048	0				CID	/Neuroblastom-Imaging/Imaging-Sample1/ZW_Neuroblastom_E22965-08_3_RA3_01_4008.d/+MS2(554.3131), 30.3eV, 45.0min #12637	ZW_Neuroblastom_E22965-08_3_RA3_01_4008.d	SwissProt-human-oReAlk2019_Mascot_2019-10-14 16:08:34	Protein Search
645.797	1.55287	1290.59	1290.58	34.7 (M.expect:0.0,M.score:34.7)	253 - 264	R.ADGYEPPVQESV.-	73356	RS3A_HUMAN	40S ribosomal protein S3a OS=Homo sapiens OX=9606 GN=RPS3A PE=1 SV=2	1196		TRUE	5095	1289.58	645.796	1289.58	2	0.00100284	0.00200568	1.55408	8.03241	0.00443414	49.3808	0.0126511	42.7037	1	1		1	14.9565	0				CID	/Neuroblastom-Imaging/Imaging-Sample1/ZW_Neuroblastom_E22965-08_3_RA3_01_4008.d/+MS2(645.7971), 33.0eV, 42.7min #12002	ZW_Neuroblastom_E22965-08_3_RA3_01_4008.d	SwissProt-human-oReAlk2019_Mascot_2019-10-14 16:08:34	Protein Search
386.738	1.44783	772.469	772.468	25.2 (M.expect:0.0,M.score:25.2)	192 - 198	R.IGVITNR.E	217054	RS4X_HUMAN	40S ribosomal protein S4, X isoform OS=Homo sapiens OX=9606 GN=RPS4X PE=1 SV=2	23		TRUE	10274	771.461	386.737	771.46	2	0.00055993	0.00111986	1.44971	3.11906	0.000882334	27.5813	0.0105436	21.43	1	1		1	37.8766	0				CID	/Neuroblastom-Imaging/Imaging-Sample1/ZW_Neuroblastom_E22965-08_3_RA3_01_4008.d/+MS2(386.7380), 23.0eV, 21.4min #4715	ZW_Neuroblastom_E22965-08_3_RA3_01_4008.d	SwissProt-human-oReAlk2019_Mascot_2019-10-14 16:08:34	Protein Search
416.233	1.95199	831.459	831.457	13.2 (M.expect:0.0,M.score:13.2)	246 - 252	R.LTIAEER.D	367018	RS4X_HUMAN	40S ribosomal protein S4, X isoform OS=Homo sapiens OX=9606 GN=RPS4X PE=1 SV=2	58		TRUE	6774	830.451	416.232	830.45	2	0.000812483	0.00162497	1.95436	8.82382	0.00293706	22.257	0.00869495	21.1634	1	1		1	43.2522	0				CID	/Neuroblastom-Imaging/Imaging-Sample1/ZW_Neuroblastom_E22965-08_3_RA3_01_4008.d/+MS2(416.2330), 23.6eV, 21.2min #4612	ZW_Neuroblastom_E22965-08_3_RA3_01_4008.d	SwissProt-human-oReAlk2019_Mascot_2019-10-14 16:08:34	Protein Search
495.803	1.21019	990.599	990.598	66.6 (M.expect:0.0,M.score:66.6)	222 - 230	R.LSNIFVIGK.G	306176	RS4X_HUMAN	40S ribosomal protein S4, X isoform OS=Homo sapiens OX=9606 GN=RPS4X PE=1 SV=2	316		TRUE	7891	989.592	495.803	989.591	2	0.000600019	0.00120004	1.21143	3.03469	0.00210461	3.79064	0.00266363	43.9333	1	1		1	31.9045	0				CID	/Neuroblastom-Imaging/Imaging-Sample1/ZW_Neuroblastom_E22965-08_3_RA3_01_4008.d/+MS2(495.8034), 26.8eV, 43.9min #12356	ZW_Neuroblastom_E22965-08_3_RA3_01_4008.d	SwissProt-human-oReAlk2019_Mascot_2019-10-14 16:08:34	Protein Search
492.778	1.49456	984.549	984.547	32.4 (M.expect:0.0,M.score:32.4)	137 - 145	R.QAVDVSPLR.R	133236	RS5_HUMAN	40S ribosomal protein S5 OS=Homo sapiens OX=9606 GN=RPS5 PE=1 SV=4	298		TRUE	8299	983.541	492.777	983.54	2	0.000736488	0.00147298	1.49609	6.82022	0.00291839	17.7234	0.010004	28.0795	1	1		1	30.2874	0				CID	/Neuroblastom-Imaging/Imaging-Sample1/ZW_Neuroblastom_E22965-08_3_RA3_01_4008.d/+MS2(492.7780), 26.7eV, 28.1min #7167	ZW_Neuroblastom_E22965-08_3_RA3_01_4008.d	SwissProt-human-oReAlk2019_Mascot_2019-10-14 16:08:34	Protein Search
935.956	-1.59038	1870.9	1870.91	26.9 (M.expect:0.0,M.score:26.9)	2 - 18	M.TEWETAAPAVAETPDIK.L	77728	RS5_HUMAN	40S ribosomal protein S5 OS=Homo sapiens OX=9606 GN=RPS5 PE=1 SV=4	3097		TRUE	11803	1869.9	935.957	1869.9	2	-0.00148853	-0.00297706	-1.59124	8.15813	0.0061376	10.4243	0.00820794	58.87	5	1		1	19.4756	0	Acetyl: 1			CID	/Neuroblastom-Imaging/Imaging-Sample1/ZW_Neuroblastom_E22965-08_3_RA3_01_4008.d/+MS2(935.9556), 51.8eV, 58.9min #16360	ZW_Neuroblastom_E22965-08_3_RA3_01_4008.d	SwissProt-human-oReAlk2019_Mascot_2019-10-14 16:08:34	Protein Search
935.956	-1.41943	1870.9	1870.91	19.2 (M.expect:0.0,M.score:19.2)	2 - 18	M.TEWETAAPAVAETPDIK.L	38110	RS5_HUMAN	40S ribosomal protein S5 OS=Homo sapiens OX=9606 GN=RPS5 PE=1 SV=4	3098		TRUE	13218	1869.9	935.957	1869.9	2	-0.00132853	-0.00265706	-1.4202	7.68352	0.00595053	35.0265	0.0140399	58.9657	5	1		1	15.7797	0	Acetyl: 1			CID	/Neuroblastom-Imaging/Imaging-Sample1/ZW_Neuroblastom_E22965-08_3_RA3_01_4008.d/+MS2(935.9558), 51.8eV, 59.0min #16385	ZW_Neuroblastom_E22965-08_3_RA3_01_4008.d	SwissProt-human-oReAlk2019_Mascot_2019-10-14 16:08:34	Protein Search
935.956	-1.38738	1870.9	1870.91	26.2 (M.expect:0.0,M.score:26.2)	2 - 18	M.TEWETAAPAVAETPDIK.L	19816	RS5_HUMAN	40S ribosomal protein S5 OS=Homo sapiens OX=9606 GN=RPS5 PE=1 SV=4	3099		TRUE	14079	1869.9	935.957	1869.9	2	-0.00129853	-0.00259706	-1.38813	9.74234	0.00661251	14.427	0.01219	59.0198	5	1		1	13.7928	0	Acetyl: 1			CID	/Neuroblastom-Imaging/Imaging-Sample1/ZW_Neuroblastom_E22965-08_3_RA3_01_4008.d/+MS2(935.9558), 51.8eV, 59.0min #16399	ZW_Neuroblastom_E22965-08_3_RA3_01_4008.d	SwissProt-human-oReAlk2019_Mascot_2019-10-14 16:08:34	Protein Search
935.956	-1.30191	1870.9	1870.91	39.0 (M.expect:0.0,M.score:39.0)	2 - 18	M.TEWETAAPAVAETPDIK.L	69688	RS5_HUMAN	40S ribosomal protein S5 OS=Homo sapiens OX=9606 GN=RPS5 PE=1 SV=4	3100		TRUE	11283	1869.9	935.957	1869.9	2	-0.00121853	-0.00243706	-1.30261	11.1781	0.00779663	13.4177	0.012725	58.9088	5	1		1	21.637	0	Acetyl: 1			CID	/Neuroblastom-Imaging/Imaging-Sample1/ZW_Neuroblastom_E22965-08_3_RA3_01_4008.d/+MS2(935.9559), 51.8eV, 58.9min #16368	ZW_Neuroblastom_E22965-08_3_RA3_01_4008.d	SwissProt-human-oReAlk2019_Mascot_2019-10-14 16:08:34	Protein Search
935.956	-0.90659	1870.91	1870.91	34.9 (M.expect:0.0,M.score:34.9)	2 - 18	M.TEWETAAPAVAETPDIK.L	28830	RS5_HUMAN	40S ribosomal protein S5 OS=Homo sapiens OX=9606 GN=RPS5 PE=1 SV=4	3101		TRUE	10339	1869.9	935.957	1869.9	2	-0.000848528	-0.00169706	-0.907078	6.6923	0.00457124	7.4433	0.00582731	58.7998	5	1		1	18.8626	0	Acetyl: 1			CID	/Neuroblastom-Imaging/Imaging-Sample1/ZW_Neuroblastom_E22965-08_3_RA3_01_4008.d/+MS2(935.9562), 51.8eV, 58.8min #16334	ZW_Neuroblastom_E22965-08_3_RA3_01_4008.d	SwissProt-human-oReAlk2019_Mascot_2019-10-14 16:08:34	Protein Search
485.256	0.262515	969.504	969.504	14.2 (M.expect:0.0,M.score:14.2)	194 - 200	K.ELEFYLR.K	34834	RS8_HUMAN	40S ribosomal protein S8 OS=Homo sapiens OX=9606 GN=RPS8 PE=1 SV=2	257		TRUE	10983	968.497	485.256	968.497	2	0.000127387	0.000254774	0.262787	3.34975	0.0020323	13.4821	0.0111867	43.9886	1	1		1	25.1099	0				CID	/Neuroblastom-Imaging/Imaging-Sample1/ZW_Neuroblastom_E22965-08_3_RA3_01_4008.d/+MS2(485.2558), 26.4eV, 44.0min #12375	ZW_Neuroblastom_E22965-08_3_RA3_01_4008.d	SwissProt-human-oReAlk2019_Mascot_2019-10-14 16:08:34	Protein Search
552.291	-1.68259	1103.57	1103.58	16.4 (M.expect:0.0,M.score:16.4)	2 - 11	M.SGALDVLQMK.E	8074	RSSA_HUMAN	40S ribosomal protein SA OS=Homo sapiens OX=9606 GN=RPSA PE=1 SV=4	568		TRUE	16130	1102.57	552.292	1102.57	2	-0.000929278	-0.00185856	-1.68412	16.4317	0.00913027	21.9629	0.0172792	59.2647	1	1		1	20.1452	0	Acetyl: 1			CID	/Neuroblastom-Imaging/Imaging-Sample1/ZW_Neuroblastom_E22965-08_3_RA3_01_4008.d/+MS2(552.2910), 30.1eV, 59.3min #16456	ZW_Neuroblastom_E22965-08_3_RA3_01_4008.d	SwissProt-human-oReAlk2019_Mascot_2019-10-14 16:08:34	Protein Search
602.327	-0.683766	1203.65	1203.65	28.5 (M.expect:0.0,M.score:28.5)	90 - 102	K.FAAATGATPIAGR.F	124676	RSSA_HUMAN	40S ribosomal protein SA OS=Homo sapiens OX=9606 GN=RPSA PE=1 SV=4	887		TRUE	5852	1202.64	602.328	1202.64	2	-0.000411851	-0.000823702	-0.684338	7.03475	0.00440769	30.5634	0.00811806	28.3402	2	1		1	32.8416	0				CID	/Neuroblastom-Imaging/Imaging-Sample1/ZW_Neuroblastom_E22965-08_3_RA3_01_4008.d/+MS2(602.3272), 33.0eV, 28.3min #7266	ZW_Neuroblastom_E22965-08_3_RA3_01_4008.d	SwissProt-human-oReAlk2019_Mascot_2019-10-14 16:08:34	Protein Search
602.328	1.02627	1203.65	1203.65	44.2 (M.expect:0.0,M.score:44.2)	90 - 102	K.FAAATGATPIAGR.F	496358	RSSA_HUMAN	40S ribosomal protein SA OS=Homo sapiens OX=9606 GN=RPSA PE=1 SV=4	888		TRUE	1345	1202.64	602.328	1202.64	2	0.000618149	0.0012363	1.02712	3.24216	0.00107122	5.12788	0.0021174	28.3899	2	1		1	47.8261	0				CID	/Neuroblastom-Imaging/Imaging-Sample1/ZW_Neuroblastom_E22965-08_3_RA3_01_4008.d/+MS2(602.3283), 33.0eV, 28.4min #7280	ZW_Neuroblastom_E22965-08_3_RA3_01_4008.d	SwissProt-human-oReAlk2019_Mascot_2019-10-14 16:08:34	Protein Search
849.933	-0.463208	1698.86	1698.86	42.2 (M.expect:0.0,M.score:42.2)	103 - 117	R.FTPGTFTNQIQAAFR.E	19048	RSSA_HUMAN	40S ribosomal protein SA OS=Homo sapiens OX=9606 GN=RPSA PE=1 SV=4	2671		TRUE	11997	1697.85	849.934	1697.85	2	-0.000393696	-0.000787391	-0.463482	10.5369	0.00574143	15.34	0.0148701	52.9229	1	1		1	16.3135	0				CID	/Neuroblastom-Imaging/Imaging-Sample1/ZW_Neuroblastom_E22965-08_3_RA3_01_4008.d/+MS2(849.9332), 47.5eV, 52.9min #14793	ZW_Neuroblastom_E22965-08_3_RA3_01_4008.d	SwissProt-human-oReAlk2019_Mascot_2019-10-14 16:08:34	Protein Search
870.976	-2.93713	1740.94	1740.95	44.0 (M.expect:0.0,M.score:44.0)	64 - 80	R.AIVAIENPADVSVISSR.N	16568	RSSA_HUMAN	40S ribosomal protein SA OS=Homo sapiens OX=9606 GN=RPSA PE=1 SV=4	2796		TRUE	10508	1739.94	870.978	1739.94	2	-0.00255816	-0.00511633	-2.93882	6.14175	0.0052382	12.1426	0.00624981	50.7789	2	1		1	25.9976	0				CID	/Neuroblastom-Imaging/Imaging-Sample1/ZW_Neuroblastom_E22965-08_3_RA3_01_4008.d/+MS2(870.9756), 48.6eV, 50.8min #14235	ZW_Neuroblastom_E22965-08_3_RA3_01_4008.d	SwissProt-human-oReAlk2019_Mascot_2019-10-14 16:08:34	Protein Search
870.977	-1.57084	1740.95	1740.95	47.4 (M.expect:0.0,M.score:47.4)	64 - 80	R.AIVAIENPADVSVISSR.N	52622	RSSA_HUMAN	40S ribosomal protein SA OS=Homo sapiens OX=9606 GN=RPSA PE=1 SV=4	2797		TRUE	9150	1739.94	870.978	1739.94	2	-0.00136816	-0.00273633	-1.57175	5.49788	0.00597291	6.6401	0.00818791	50.8227	2	1		1	36.3531	0				CID	/Neuroblastom-Imaging/Imaging-Sample1/ZW_Neuroblastom_E22965-08_3_RA3_01_4008.d/+MS2(870.9768), 48.5eV, 50.8min #14243	ZW_Neuroblastom_E22965-08_3_RA3_01_4008.d	SwissProt-human-oReAlk2019_Mascot_2019-10-14 16:08:34	Protein Search
694.357	-0.13049	2081.06	2081.06	25.4 (M.expect:0.0,M.score:25.4)	103 - 120	R.FTPGTFTNQIQAAFREPR.L	26148	RSSA_HUMAN	40S ribosomal protein SA OS=Homo sapiens OX=9606 GN=RPSA PE=1 SV=4	3535		TRUE	6964	2080.05	694.357	2080.05	3	-9.06066e-05	-0.00027182	-0.130616	6.69174	0.00434815	8.59065	0.00608902	48.2185	1	1		1	45.2448	1				CID	/Neuroblastom-Imaging/Imaging-Sample1/ZW_Neuroblastom_E22965-08_3_RA3_01_4008.d/+MS2(694.3569), 27.0eV, 48.2min #13538	ZW_Neuroblastom_E22965-08_3_RA3_01_4008.d	SwissProt-human-oReAlk2019_Mascot_2019-10-14 16:08:34	Protein Search
753.382	-2.31267	1505.76	1505.76	15.1 (M.expect:0.0,M.score:15.1)	511 - 524	K.GQSEDPGSLLSLFR.R	21910	4F2_HUMAN	4F2 cell-surface antigen heavy chain OS=Homo sapiens OX=9606 GN=SLC3A2 PE=1 SV=3	1946		TRUE	15514	1504.75	753.383	1504.75	2	-0.00174232	-0.00348464	-2.31422	7.18154	0.0052099	8.06942	0.0075987	61.1632	3	1		1	22.4345	0				CID	/Neuroblastom-Imaging/Imaging-Sample1/ZW_Neuroblastom_E22965-08_3_RA3_01_4008.d/+MS2(753.3816), 39.4eV, 61.2min #16911	ZW_Neuroblastom_E22965-08_3_RA3_01_4008.d	SwissProt-human-oReAlk2019_Mascot_2019-10-14 16:08:34	Protein Search
753.382	-1.22424	1505.76	1505.76	43.0 (M.expect:0.0,M.score:43.0)	511 - 524	K.GQSEDPGSLLSLFR.R	28824	4F2_HUMAN	4F2 cell-surface antigen heavy chain OS=Homo sapiens OX=9606 GN=SLC3A2 PE=1 SV=3	1947		TRUE	13495	1504.75	753.383	1504.75	2	-0.000922322	-0.00184464	-1.22506	10.2572	0.00656825	12.0176	0.00968025	61.0528	3	1		1	27.602	0				CID	/Neuroblastom-Imaging/Imaging-Sample1/ZW_Neuroblastom_E22965-08_3_RA3_01_4008.d/+MS2(753.3824), 39.4eV, 61.1min #16880	ZW_Neuroblastom_E22965-08_3_RA3_01_4008.d	SwissProt-human-oReAlk2019_Mascot_2019-10-14 16:08:34	Protein Search
753.383	-0.826037	1505.76	1505.76	34.8 (M.expect:0.0,M.score:34.8)	511 - 524	K.GQSEDPGSLLSLFR.R	32248	4F2_HUMAN	4F2 cell-surface antigen heavy chain OS=Homo sapiens OX=9606 GN=SLC3A2 PE=1 SV=3	1948		TRUE	14285	1504.75	753.383	1504.75	2	-0.000622322	-0.00124464	-0.82659	4.41418	0.00235587	5.2046	0.00272478	61.1198	3	1		1	31.7299	0				CID	/Neuroblastom-Imaging/Imaging-Sample1/ZW_Neuroblastom_E22965-08_3_RA3_01_4008.d/+MS2(753.3827), 39.4eV, 61.1min #16901	ZW_Neuroblastom_E22965-08_3_RA3_01_4008.d	SwissProt-human-oReAlk2019_Mascot_2019-10-14 16:08:34	Protein Search
805.912	-0.455502	1610.82	1610.82	40.3 (M.expect:0.0,M.score:40.3)	2 - 15	M.STGTFVVSQPLNYR.G	39296	AL9A1_HUMAN	4-trimethylaminobutyraldehyde dehydrogenase OS=Homo sapiens OX=9606 GN=ALDH9A1 PE=1 SV=3	2342		TRUE	11785	1609.81	805.912	1609.81	2	-0.000367094	-0.000734188	-0.455786	7.4033	0.00609363	9.92383	0.00820871	55.4765	1	1		1	25.0903	0	Acetyl: 1			CID	/Neuroblastom-Imaging/Imaging-Sample1/ZW_Neuroblastom_E22965-08_3_RA3_01_4008.d/+MS2(805.9119), 45.3eV, 55.5min #15485	ZW_Neuroblastom_E22965-08_3_RA3_01_4008.d	SwissProt-human-oReAlk2019_Mascot_2019-10-14 16:08:34	Protein Search
654.856	-0.422178	1308.71	1308.71	38.5 (M.expect:0.0,M.score:38.5)	884 - 895	R.GVGAEPLLPWNR.M	61376	XRN2_HUMAN	5'-3' exoribonuclease 2 OS=Homo sapiens OX=9606 GN=XRN2 PE=1 SV=1	1265		TRUE	8570	1307.7	654.857	1307.7	2	-0.000276466	-0.000552932	-0.422503	7.40562	0.00500889	10.8196	0.0105703	48.4738	1	1		1	32.3007	0				CID	/Neuroblastom-Imaging/Imaging-Sample1/ZW_Neuroblastom_E22965-08_3_RA3_01_4008.d/+MS2(654.8563), 33.0eV, 48.5min #13608	ZW_Neuroblastom_E22965-08_3_RA3_01_4008.d	SwissProt-human-oReAlk2019_Mascot_2019-10-14 16:08:34	Protein Search
655.678	-0.0933797	1965.02	1965.02	27.9 (M.expect:0.0,M.score:27.9)	428 - 446	R.DQPAFTPSGILTPHALGSR.N	42334	XRN2_HUMAN	5'-3' exoribonuclease 2 OS=Homo sapiens OX=9606 GN=XRN2 PE=1 SV=1	3386		TRUE	5624	1964.01	655.678	1964.01	3	-6.1227e-05	-0.000183681	-0.0934754	9.88634	0.011373	16.9588	0.0165548	49.0418	1	1		1	19.0874	0				CID	/Neuroblastom-Imaging/Imaging-Sample1/ZW_Neuroblastom_E22965-08_3_RA3_01_4008.d/+MS2(655.6777), 27.0eV, 49.0min #13769	ZW_Neuroblastom_E22965-08_3_RA3_01_4008.d	SwissProt-human-oReAlk2019_Mascot_2019-10-14 16:08:34	Protein Search
677.402	-1.4838	1353.8	1353.8	18.3 (M.expect:0.0,M.score:18.3)	375 - 386	K.IAILDIEPQTLK.I	8090	EM55_HUMAN	55 kDa erythrocyte membrane protein OS=Homo sapiens OX=9606 GN=MPP1 PE=1 SV=2	1442		TRUE	13469	1352.79	677.403	1352.79	2	-0.00100513	-0.00201026	-1.48491	7.90744	0.00607657	9.57965	0.00861786	53.4449	1	1		1	12.968	0				CID	/Neuroblastom-Imaging/Imaging-Sample1/ZW_Neuroblastom_E22965-08_3_RA3_01_4008.d/+MS2(677.4020), 33.0eV, 53.5min #14934	ZW_Neuroblastom_E22965-08_3_RA3_01_4008.d	SwissProt-human-oReAlk2019_Mascot_2019-10-14 16:08:34	Protein Search
480.76	0.913639	960.512	960.511	15.0 (M.expect:0.0,M.score:15.0)	421 - 429	R.VTDALNATR.A	62468	CH60_HUMAN	60 kDa heat shock protein, mitochondrial OS=Homo sapiens OX=9606 GN=HSPD1 PE=1 SV=2	243		TRUE	2833	959.504	480.759	959.504	2	0.000439241	0.000878482	0.914597	13.3428	0.00959989	20.3388	0.0142149	19.5863	1	1		1	8.15208	0				CID	/Neuroblastom-Imaging/Imaging-Sample1/ZW_Neuroblastom_E22965-08_3_RA3_01_4008.d/+MS2(480.7595), 26.2eV, 19.6min #4011	ZW_Neuroblastom_E22965-08_3_RA3_01_4008.d	SwissProt-human-oReAlk2019_Mascot_2019-10-14 16:08:34	Protein Search
854.087	-1.28085	2560.25	2560.25	21.9 (M.expect:0.0,M.score:21.9)	97 - 121	K.LVQDVANNTNEEAGDGTTTATVLAR.S	18712	CH60_HUMAN	60 kDa heat shock protein, mitochondrial OS=Homo sapiens OX=9606 GN=HSPD1 PE=1 SV=2	3853		TRUE	6212	2559.24	854.088	2559.24	3	-0.00109395	-0.00328186	-1.28185	8.54687	0.00420371	12.3305	0.00882534	38.8013	1	1		1	10.5338	0				CID	/Neuroblastom-Imaging/Imaging-Sample1/ZW_Neuroblastom_E22965-08_3_RA3_01_4008.d/+MS2(854.0866), 42.7eV, 38.8min #10817	ZW_Neuroblastom_E22965-08_3_RA3_01_4008.d	SwissProt-human-oReAlk2019_Mascot_2019-10-14 16:08:34	Protein Search
657.358	-0.787437	1313.71	1313.71	15.0 (M.expect:0.0,M.score:15.0)	135 - 146	K.TSFFQALGITTK.I	7880	RLA0L_HUMAN	60S acidic ribosomal protein P0-like OS=Homo sapiens OX=9606 GN=RPLP0P6 PE=5 SV=1	1292		TRUE	13859	1312.7	657.359	1312.7	2	-0.000517628	-0.00103526	-0.788041	13.7715	0.0093301	28.0628	0.0148508	54.8764	1	1		1	7.47823	0				CID	/Neuroblastom-Imaging/Imaging-Sample1/ZW_Neuroblastom_E22965-08_3_RA3_01_4008.d/+MS2(657.3581), 33.0eV, 54.9min #15335	ZW_Neuroblastom_E22965-08_3_RA3_01_4008.d	SwissProt-human-oReAlk2019_Mascot_2019-10-14 16:08:34	Protein Search
851.952	0.510437	1702.9	1702.9	22.6 (M.expect:0.0,M.score:22.6)	34 - 49	K.AAGVNVEPFWPGLFAK.A	9262	RLA1_HUMAN	60S acidic ribosomal protein P1 OS=Homo sapiens OX=9606 GN=RPLP1 PE=1 SV=1	2691		TRUE	14915	1701.89	851.951	1701.89	2	0.000434867	0.000869735	0.510739	6.73167	0.00412649	18.7042	0.0116526	64.1704	1	1		1	14.9208	0				CID	/Neuroblastom-Imaging/Imaging-Sample1/ZW_Neuroblastom_E22965-08_3_RA3_01_4008.d/+MS2(851.9516), 47.6eV, 64.2min #17553	ZW_Neuroblastom_E22965-08_3_RA3_01_4008.d	SwissProt-human-oReAlk2019_Mascot_2019-10-14 16:08:34	Protein Search
1387.72	-1.22125	2774.43	2774.43	19.3 (M.expect:0.0,M.score:19.3)	62 - 94	K.LASVPAGGAVAVSAAPGSAAPAAGSAPAAAEEK.K	22518	RLA2_HUMAN	60S acidic ribosomal protein P2 OS=Homo sapiens OX=9606 GN=RPLP2 PE=1 SV=1	3894		TRUE	11684	2773.42	1387.72	2773.42	2	-0.00169475	-0.0033895	-1.22169	8.56375	0.0103731	12.0179	0.0135533	41.8389	1	1		1	19.2457	0				CID	/Neuroblastom-Imaging/Imaging-Sample1/ZW_Neuroblastom_E22965-08_3_RA3_01_4008.d/+MS2(1387.7179), 65.0eV, 41.8min #11747	ZW_Neuroblastom_E22965-08_3_RA3_01_4008.d	SwissProt-human-oReAlk2019_Mascot_2019-10-14 16:08:34	Protein Search
567.591	-0.0615578	1700.76	1700.76	52.7 (M.expect:0.0,M.score:52.7)	176 - 189	K.FNADEFEDMVAEKR.L	66470	RL10_HUMAN	60S ribosomal protein L10 OS=Homo sapiens OX=9606 GN=RPL10 PE=1 SV=4	2678		TRUE	3948	1699.75	567.591	1699.75	3	-3.49396e-05	-0.000104819	-0.0616307	5.95764	0.00335337	13.3652	0.00512003	42.707	1	1		1	26.7034	1				CID	/Neuroblastom-Imaging/Imaging-Sample1/ZW_Neuroblastom_E22965-08_3_RA3_01_4008.d/+MS2(567.5910), 26.4eV, 42.7min #12004	ZW_Neuroblastom_E22965-08_3_RA3_01_4008.d	SwissProt-human-oReAlk2019_Mascot_2019-10-14 16:08:34	Protein Search
483.749	1.13339	966.49	966.489	19.4 (M.expect:0.0,M.score:19.4)	8 - 15	R.DTLYEAVR.E	268822	RL10A_HUMAN	60S ribosomal protein L10a OS=Homo sapiens OX=9606 GN=RPL10A PE=1 SV=2	252		TRUE	7605	965.483	483.748	965.482	2	0.000548278	0.00109656	1.13458	4.7496	0.00157356	5.88733	0.00189552	29.8432	2	1		1	31.9694	0				CID	/Neuroblastom-Imaging/Imaging-Sample1/ZW_Neuroblastom_E22965-08_3_RA3_01_4008.d/+MS2(483.7487), 26.3eV, 29.8min #7769	ZW_Neuroblastom_E22965-08_3_RA3_01_4008.d	SwissProt-human-oReAlk2019_Mascot_2019-10-14 16:08:34	Protein Search
483.749	2.10497	966.491	966.489	17.9 (M.expect:0.0,M.score:17.9)	8 - 15	R.DTLYEAVR.E	35766	RL10A_HUMAN	60S ribosomal protein L10a OS=Homo sapiens OX=9606 GN=RPL10A PE=1 SV=2	253		TRUE	4548	965.484	483.748	965.482	2	0.00101828	0.00203656	2.10716	4.38894	0.00150203	5.71622	0.001632	30.167	2	1		1	6.02493	0				CID	/Neuroblastom-Imaging/Imaging-Sample1/ZW_Neuroblastom_E22965-08_3_RA3_01_4008.d/+MS2(483.7492), 24.7eV, 30.2min #7882	ZW_Neuroblastom_E22965-08_3_RA3_01_4008.d	SwissProt-human-oReAlk2019_Mascot_2019-10-14 16:08:34	Protein Search
678.856	-0.556472	1356.7	1356.7	38.9 (M.expect:0.0,M.score:38.9)	107 - 118	K.YDAFLASESLIK.Q	21136	RL10A_HUMAN	60S ribosomal protein L10a OS=Homo sapiens OX=9606 GN=RPL10A PE=1 SV=2	1458		TRUE	11863	1355.7	678.856	1355.7	2	-0.000377764	-0.000755528	-0.556885	6.20592	0.00424538	12.6257	0.00772188	51.2337	2	1		1	22.4775	0				CID	/Neuroblastom-Imaging/Imaging-Sample1/ZW_Neuroblastom_E22965-08_3_RA3_01_4008.d/+MS2(678.8555), 33.0eV, 51.2min #14347	ZW_Neuroblastom_E22965-08_3_RA3_01_4008.d	SwissProt-human-oReAlk2019_Mascot_2019-10-14 16:08:34	Protein Search
678.856	-0.350242	1356.7	1356.7	30.0 (M.expect:0.0,M.score:30.0)	107 - 118	K.YDAFLASESLIK.Q	16018	RL10A_HUMAN	60S ribosomal protein L10a OS=Homo sapiens OX=9606 GN=RPL10A PE=1 SV=2	1459		TRUE	11999	1355.7	678.856	1355.7	2	-0.000237764	-0.000475528	-0.350502	7.28333	0.0067688	8.71883	0.00828256	51.1328	2	1		1	21.8095	0				CID	/Neuroblastom-Imaging/Imaging-Sample1/ZW_Neuroblastom_E22965-08_3_RA3_01_4008.d/+MS2(678.8557), 33.0eV, 51.1min #14323	ZW_Neuroblastom_E22965-08_3_RA3_01_4008.d	SwissProt-human-oReAlk2019_Mascot_2019-10-14 16:08:34	Protein Search
495.605	0.944974	1484.8	1484.8	20.0 (M.expect:0.0,M.score:20.0)	106 - 118	K.KYDAFLASESLIK.Q	96168	RL10A_HUMAN	60S ribosomal protein L10a OS=Homo sapiens OX=9606 GN=RPL10A PE=1 SV=2	1882		TRUE	3207	1483.79	495.605	1483.79	3	0.000468334	0.001405	0.946256	3.95947	0.00151057	5.27307	0.00207777	42.038	1	1		1	8.35658	1				CID	/Neuroblastom-Imaging/Imaging-Sample1/ZW_Neuroblastom_E22965-08_3_RA3_01_4008.d/+MS2(495.6052), 24.9eV, 42.0min #11805	ZW_Neuroblastom_E22965-08_3_RA3_01_4008.d	SwissProt-human-oReAlk2019_Mascot_2019-10-14 16:08:34	Protein Search
773.926	-1.42867	1546.85	1546.85	14.4 (M.expect:0.0,M.score:14.4)	39 - 52	K.VLEQLTGQTPVFSK.A	44480	RL11_HUMAN	60S ribosomal protein L11 OS=Homo sapiens OX=9606 GN=RPL11 PE=1 SV=2	2100		TRUE	8926	1545.84	773.927	1545.84	2	-0.00110569	-0.00221137	-1.4296	14.9519	0.0103891	17.6308	0.0129545	45.3172	2	1		1	9.82584	0				CID	/Neuroblastom-Imaging/Imaging-Sample1/ZW_Neuroblastom_E22965-08_3_RA3_01_4008.d/+MS2(773.9263), 42.0eV, 45.3min #12737	ZW_Neuroblastom_E22965-08_3_RA3_01_4008.d	SwissProt-human-oReAlk2019_Mascot_2019-10-14 16:08:34	Protein Search
773.927	-0.795534	1546.85	1546.85	48.0 (M.expect:0.0,M.score:48.0)	39 - 52	K.VLEQLTGQTPVFSK.A	113620	RL11_HUMAN	60S ribosomal protein L11 OS=Homo sapiens OX=9606 GN=RPL11 PE=1 SV=2	2101		TRUE	9644	1545.84	773.927	1545.84	2	-0.000615685	-0.00123137	-0.796052	10.459	0.00696273	12.4936	0.00859194	45.0498	2	1		1	25.5101	0				CID	/Neuroblastom-Imaging/Imaging-Sample1/ZW_Neuroblastom_E22965-08_3_RA3_01_4008.d/+MS2(773.9268), 41.9eV, 45.1min #12662	ZW_Neuroblastom_E22965-08_3_RA3_01_4008.d	SwissProt-human-oReAlk2019_Mascot_2019-10-14 16:08:34	Protein Search
564.976	1.50639	1692.91	1692.91	18.8 (M.expect:0.0,M.score:18.8)	165 - 178	R.WFQQKYDGIILPGK.-	95348	RL11_HUMAN	60S ribosomal protein L11 OS=Homo sapiens OX=9606 GN=RPL11 PE=1 SV=2	2642		TRUE	7277	1691.91	564.975	1691.9	3	0.000851073	0.00255322	1.50818	5.78376	0.00416077	7.08324	0.00477319	43.684	1	1		1	17.2028	1				CID	/Neuroblastom-Imaging/Imaging-Sample1/ZW_Neuroblastom_E22965-08_3_RA3_01_4008.d/+MS2(564.9760), 26.3eV, 43.7min #12285	ZW_Neuroblastom_E22965-08_3_RA3_01_4008.d	SwissProt-human-oReAlk2019_Mascot_2019-10-14 16:08:34	Protein Search
441.277	1.40942	881.547	881.545	32.1 (M.expect:0.0,M.score:32.1)	32 - 40	K.IGPLGLSPK.K	134206	RL12_HUMAN	60S ribosomal protein L12 OS=Homo sapiens OX=9606 GN=RPL12 PE=1 SV=1	110		TRUE	11890	880.539	441.276	880.538	2	0.000621945	0.00124389	1.41103	27.7193	0.0112853	67.3719	0.0177652	34.3861	1	1		1	35.6989	0				CID	/Neuroblastom-Imaging/Imaging-Sample1/ZW_Neuroblastom_E22965-08_3_RA3_01_4008.d/+MS2(441.2770), 24.7eV, 34.4min #9351	ZW_Neuroblastom_E22965-08_3_RA3_01_4008.d	SwissProt-human-oReAlk2019_Mascot_2019-10-14 16:08:34	Protein Search
475.751	1.16781	950.495	950.494	26.2 (M.expect:0.0,M.score:26.2)	75 - 82	R.GFSLEELR.V	689658	RL13_HUMAN	60S ribosomal protein L13 OS=Homo sapiens OX=9606 GN=RPL13 PE=1 SV=4	228		TRUE	3050	949.488	475.751	949.487	2	0.000555589	0.00111118	1.16905	2.00849	0.000771356	2.84438	0.00092861	40.1381	2	1		1	44.8358	0				CID	/Neuroblastom-Imaging/Imaging-Sample1/ZW_Neuroblastom_E22965-08_3_RA3_01_4008.d/+MS2(475.7513), 26.0eV, 40.1min #11228	ZW_Neuroblastom_E22965-08_3_RA3_01_4008.d	SwissProt-human-oReAlk2019_Mascot_2019-10-14 16:08:34	Protein Search
475.751	1.42005	950.496	950.494	28.7 (M.expect:0.0,M.score:28.7)	75 - 82	R.GFSLEELR.V	106202	RL13_HUMAN	60S ribosomal protein L13 OS=Homo sapiens OX=9606 GN=RPL13 PE=1 SV=4	229		TRUE	10305	949.488	475.751	949.487	2	0.000675589	0.00135118	1.42155	3.15882	0.00126842	4.65367	0.00355627	40.0895	2	1		1	24.2073	0				CID	/Neuroblastom-Imaging/Imaging-Sample1/ZW_Neuroblastom_E22965-08_3_RA3_01_4008.d/+MS2(475.7514), 26.0eV, 40.1min #11215	ZW_Neuroblastom_E22965-08_3_RA3_01_4008.d	SwissProt-human-oReAlk2019_Mascot_2019-10-14 16:08:34	Protein Search
479.272	0.972321	957.537	957.536	14.3 (M.expect:0.0,M.score:14.3)	93 - 101	R.TIGISVDPR.R	252418	RL13_HUMAN	60S ribosomal protein L13 OS=Homo sapiens OX=9606 GN=RPL13 PE=1 SV=4	238		TRUE	8363	956.53	479.272	956.529	2	0.000466006	0.000932013	0.973343	8.79943	0.00334012	16.3979	0.00496593	32.1403	1	1		1	43.0502	0				CID	/Neuroblastom-Imaging/Imaging-Sample1/ZW_Neuroblastom_E22965-08_3_RA3_01_4008.d/+MS2(479.2723), 26.2eV, 32.1min #8576	ZW_Neuroblastom_E22965-08_3_RA3_01_4008.d	SwissProt-human-oReAlk2019_Mascot_2019-10-14 16:08:34	Protein Search
595.309	0.130802	1189.61	1189.61	36.3 (M.expect:0.0,M.score:36.3)	22 - 31	R.VATWFNQPAR.K	222632	RL13_HUMAN	60S ribosomal protein L13 OS=Homo sapiens OX=9606 GN=RPL13 PE=1 SV=4	822		TRUE	6332	1188.6	595.309	1188.6	2	7.78675e-05	0.000155735	0.130913	3.44929	0.00236242	5.23251	0.00445513	33.9635	1	1		1	22.8927	0				CID	/Neuroblastom-Imaging/Imaging-Sample1/ZW_Neuroblastom_E22965-08_3_RA3_01_4008.d/+MS2(595.3093), 32.7eV, 34.0min #9205	ZW_Neuroblastom_E22965-08_3_RA3_01_4008.d	SwissProt-human-oReAlk2019_Mascot_2019-10-14 16:08:34	Protein Search
691.895	-0.165266	1382.78	1382.78	51.2 (M.expect:0.0,M.score:51.2)	146 - 158	K.LATQLTGPVMPVR.N	89140	RL13_HUMAN	60S ribosomal protein L13 OS=Homo sapiens OX=9606 GN=RPL13 PE=1 SV=4	1566		TRUE	1525	1381.77	691.895	1381.78	2	-0.000114347	-0.000228693	-0.165386	3.53667	0.0024447	9.33142	0.00609865	42.5096	3	1		1	37.1776	0				CID	/Neuroblastom-Imaging/Imaging-Sample1/ZW_Neuroblastom_E22965-08_3_RA3_01_4008.d/+MS2(691.8947), 33.0eV, 42.5min #11943	ZW_Neuroblastom_E22965-08_3_RA3_01_4008.d	SwissProt-human-oReAlk2019_Mascot_2019-10-14 16:08:34	Protein Search
691.895	0.037077	1382.78	1382.78	74.5 (M.expect:0.0,M.score:74.5)	146 - 158	K.LATQLTGPVMPVR.N	334568	RL13_HUMAN	60S ribosomal protein L13 OS=Homo sapiens OX=9606 GN=RPL13 PE=1 SV=4	1567		TRUE	5004	1381.78	691.895	1381.78	2	2.56534e-05	5.13068e-05	0.037104	7.41249	0.00479382	10.3584	0.00908247	42.5445	3	1		1	39.3357	0				CID	/Neuroblastom-Imaging/Imaging-Sample1/ZW_Neuroblastom_E22965-08_3_RA3_01_4008.d/+MS2(691.8949), 33.0eV, 42.5min #11948	ZW_Neuroblastom_E22965-08_3_RA3_01_4008.d	SwissProt-human-oReAlk2019_Mascot_2019-10-14 16:08:34	Protein Search
691.895	0.037077	1382.78	1382.78	70.5 (M.expect:0.0,M.score:70.5)	146 - 158	K.LATQLTGPVMPVR.N	334568	RL13_HUMAN	60S ribosomal protein L13 OS=Homo sapiens OX=9606 GN=RPL13 PE=1 SV=4	1568		TRUE	3006	1381.78	691.895	1381.78	2	2.56534e-05	5.13068e-05	0.037104	2.66991	0.0017861	3.21532	0.00242423	42.5451	3	1		1	47.9876	0				CID	/Neuroblastom-Imaging/Imaging-Sample1/ZW_Neuroblastom_E22965-08_3_RA3_01_4008.d/+MS2(691.8949), 27.0eV, 42.5min #11949	ZW_Neuroblastom_E22965-08_3_RA3_01_4008.d	SwissProt-human-oReAlk2019_Mascot_2019-10-14 16:08:34	Protein Search
699.892	-0.0312142	1398.78	1398.78	57.8 (M.expect:0.0,M.score:57.8)	146 - 158	K.LATQLTGPVMPVR.N	135906	RL13_HUMAN	60S ribosomal protein L13 OS=Homo sapiens OX=9606 GN=RPL13 PE=1 SV=4	1626		TRUE	8060	1397.77	699.892	1397.77	2	-2.18466e-05	-4.36932e-05	-0.0312367	4.69948	0.00272885	7.32111	0.00625385	35.635	1	1		1	29.1368	0	Oxidation: 10			CID	/Neuroblastom-Imaging/Imaging-Sample1/ZW_Neuroblastom_E22965-08_3_RA3_01_4008.d/+MS2(699.8923), 33.0eV, 35.6min #9767	ZW_Neuroblastom_E22965-08_3_RA3_01_4008.d	SwissProt-human-oReAlk2019_Mascot_2019-10-14 16:08:34	Protein Search
449.744	1.8846	898.48	898.478	24.6 (M.expect:0.0,M.score:24.6)	57 - 63	K.QGYVIYR.I	190352	RL15_HUMAN	60S ribosomal protein L15 OS=Homo sapiens OX=9606 GN=RPL15 PE=1 SV=2	135		TRUE	6733	897.473	449.743	897.471	2	0.000847587	0.00169517	1.88671	4.26187	0.00220896	9.88956	0.0067139	25.3112	1	1		1	26.4201	0				CID	/Neuroblastom-Imaging/Imaging-Sample1/ZW_Neuroblastom_E22965-08_3_RA3_01_4008.d/+MS2(449.7435), 25.0eV, 25.3min #6153	ZW_Neuroblastom_E22965-08_3_RA3_01_4008.d	SwissProt-human-oReAlk2019_Mascot_2019-10-14 16:08:34	Protein Search
509.763	1.90203	1018.52	1018.52	16.2 (M.expect:0.0,M.score:16.2)	97 - 105	R.SLQSVAEER.A	244894	RL15_HUMAN	60S ribosomal protein L15 OS=Homo sapiens OX=9606 GN=RPL15 PE=1 SV=2	371		TRUE	4376	1017.51	509.762	1017.51	2	0.000969587	0.00193917	1.90392	3.58916	0.00137495	5.03887	0.0033145	20.6396	1	1		1	25.9464	0				CID	/Neuroblastom-Imaging/Imaging-Sample1/ZW_Neuroblastom_E22965-08_3_RA3_01_4008.d/+MS2(509.7628), 27.6eV, 20.6min #4416	ZW_Neuroblastom_E22965-08_3_RA3_01_4008.d	SwissProt-human-oReAlk2019_Mascot_2019-10-14 16:08:34	Protein Search
582.286	5.15959	1163.56	1163.56	20.8 (M.expect:0.0,M.score:20.8)	4 - 13	R.YSLDPENPTK.S	98790	RL17_HUMAN	60S ribosomal protein L17 OS=Homo sapiens OX=9606 GN=RPL17 PE=1 SV=3	744		TRUE	7314	1162.56	582.283	1162.55	2	0.00300435	0.00600871	5.16406	4.8022	0.00331896	5.13249	0.00371588	28.7042	1	1		1	13.2602	0				CID	/Neuroblastom-Imaging/Imaging-Sample1/ZW_Neuroblastom_E22965-08_3_RA3_01_4008.d/+MS2(582.2856), 31.9eV, 28.7min #7390	ZW_Neuroblastom_E22965-08_3_RA3_01_4008.d	SwissProt-human-oReAlk2019_Mascot_2019-10-14 16:08:34	Protein Search
380.889	3.13783	1140.65	1140.65	25.5 (M.expect:0.0,M.score:25.5)	56 - 65	R.TNRPPLSLSR.M	44640	RL18_HUMAN	60S ribosomal protein L18 OS=Homo sapiens OX=9606 GN=RPL18 PE=1 SV=2	672		TRUE	8599	1139.64	380.888	1139.64	3	0.00119517	0.0035855	3.14337	6.24347	0.0032903	62.8302	0.0128406	21.3867	1	1		1	13.3485	0				CID	/Neuroblastom-Imaging/Imaging-Sample1/ZW_Neuroblastom_E22965-08_3_RA3_01_4008.d/+MS2(380.8888), 23.0eV, 21.4min #4704	ZW_Neuroblastom_E22965-08_3_RA3_01_4008.d	SwissProt-human-oReAlk2019_Mascot_2019-10-14 16:08:34	Protein Search
673.369	-1.2974	1345.73	1345.73	36.0 (M.expect:0.0,M.score:36.0)	79 - 91	K.TAVVVGTITDDVR.V	92528	RL18_HUMAN	60S ribosomal protein L18 OS=Homo sapiens OX=9606 GN=RPL18 PE=1 SV=2	1413		TRUE	6793	1344.72	673.37	1344.72	2	-0.000873631	-0.00174726	-1.29837	8.28202	0.00355781	10.4166	0.0072881	38.5422	1	1		1	31.3819	0				CID	/Neuroblastom-Imaging/Imaging-Sample1/ZW_Neuroblastom_E22965-08_3_RA3_01_4008.d/+MS2(673.3689), 33.0eV, 38.5min #10731	ZW_Neuroblastom_E22965-08_3_RA3_01_4008.d	SwissProt-human-oReAlk2019_Mascot_2019-10-14 16:08:34	Protein Search
730.903	-0.628363	1460.8	1460.8	59.6 (M.expect:0.0,M.score:59.6)	120 - 132	K.ILTFDQLALDSPK.G	41104	RL18_HUMAN	60S ribosomal protein L18 OS=Homo sapiens OX=9606 GN=RPL18 PE=1 SV=2	1793		TRUE	11037	1459.79	730.903	1459.79	2	-0.000459273	-0.000918545	-0.628797	13.4182	0.0110387	15.9349	0.0134324	54.9592	5	1		1	29.3069	0				CID	/Neuroblastom-Imaging/Imaging-Sample1/ZW_Neuroblastom_E22965-08_3_RA3_01_4008.d/+MS2(730.9029), 36.7eV, 55.0min #15350	ZW_Neuroblastom_E22965-08_3_RA3_01_4008.d	SwissProt-human-oReAlk2019_Mascot_2019-10-14 16:08:34	Protein Search
730.903	-0.546273	1460.8	1460.8	38.7 (M.expect:0.0,M.score:38.7)	120 - 132	K.ILTFDQLALDSPK.G	38220	RL18_HUMAN	60S ribosomal protein L18 OS=Homo sapiens OX=9606 GN=RPL18 PE=1 SV=2	1794		TRUE	12738	1459.79	730.903	1459.79	2	-0.000399273	-0.000798545	-0.54665	8.16717	0.00532083	8.93055	0.00645419	55.1759	5	1		1	21.1386	0				CID	/Neuroblastom-Imaging/Imaging-Sample1/ZW_Neuroblastom_E22965-08_3_RA3_01_4008.d/+MS2(730.9030), 36.7eV, 55.2min #15412	ZW_Neuroblastom_E22965-08_3_RA3_01_4008.d	SwissProt-human-oReAlk2019_Mascot_2019-10-14 16:08:34	Protein Search
730.903	-0.313684	1460.8	1460.8	63.0 (M.expect:0.0,M.score:63.0)	120 - 132	K.ILTFDQLALDSPK.G	159616	RL18_HUMAN	60S ribosomal protein L18 OS=Homo sapiens OX=9606 GN=RPL18 PE=1 SV=2	1795		TRUE	10790	1459.79	730.903	1459.79	2	-0.000229273	-0.000458545	-0.3139	5.45779	0.00487792	13.1114	0.0110099	55.0088	5	1		1	37.2328	0				CID	/Neuroblastom-Imaging/Imaging-Sample1/ZW_Neuroblastom_E22965-08_3_RA3_01_4008.d/+MS2(730.9032), 36.7eV, 55.0min #15362	ZW_Neuroblastom_E22965-08_3_RA3_01_4008.d	SwissProt-human-oReAlk2019_Mascot_2019-10-14 16:08:34	Protein Search
730.903	-0.04005	1460.8	1460.8	36.4 (M.expect:0.0,M.score:36.4)	120 - 132	K.ILTFDQLALDSPK.G	121640	RL18_HUMAN	60S ribosomal protein L18 OS=Homo sapiens OX=9606 GN=RPL18 PE=1 SV=2	1796		TRUE	13825	1459.79	730.903	1459.79	2	-2.92727e-05	-5.85454e-05	-0.0400776	5.32882	0.0030748	8.38794	0.00669115	55.0758	5	1		1	18.6463	0				CID	/Neuroblastom-Imaging/Imaging-Sample1/ZW_Neuroblastom_E22965-08_3_RA3_01_4008.d/+MS2(730.9034), 36.7eV, 55.1min #15384	ZW_Neuroblastom_E22965-08_3_RA3_01_4008.d	SwissProt-human-oReAlk2019_Mascot_2019-10-14 16:08:34	Protein Search
730.903	0.0146768	1460.8	1460.8	47.3 (M.expect:0.0,M.score:47.3)	120 - 132	K.ILTFDQLALDSPK.G	67200	RL18_HUMAN	60S ribosomal protein L18 OS=Homo sapiens OX=9606 GN=RPL18 PE=1 SV=2	1797		TRUE	12324	1459.79	730.903	1459.79	2	1.07273e-05	2.14546e-05	0.0146869	9.09405	0.00590438	12.6808	0.00779628	55.1333	5	1		1	18.7286	0				CID	/Neuroblastom-Imaging/Imaging-Sample1/ZW_Neuroblastom_E22965-08_3_RA3_01_4008.d/+MS2(730.9034), 36.7eV, 55.2min #15402	ZW_Neuroblastom_E22965-08_3_RA3_01_4008.d	SwissProt-human-oReAlk2019_Mascot_2019-10-14 16:08:34	Protein Search
493.768	1.79074	986.528	986.527	30.2 (M.expect:0.0,M.score:30.2)	154 - 162	K.LLADQAEAR.R	376448	RL19_HUMAN	60S ribosomal protein L19 OS=Homo sapiens OX=9606 GN=RPL19 PE=1 SV=1	299		TRUE	4393	985.521	493.767	985.519	2	0.000884209	0.00176842	1.79257	5.51717	0.00298069	22.8252	0.0096083	20.5319	1	1		1	34.233	0				CID	/Neuroblastom-Imaging/Imaging-Sample1/ZW_Neuroblastom_E22965-08_3_RA3_01_4008.d/+MS2(493.7678), 26.8eV, 20.5min #4372	ZW_Neuroblastom_E22965-08_3_RA3_01_4008.d	SwissProt-human-oReAlk2019_Mascot_2019-10-14 16:08:34	Protein Search
971.966	-0.0827056	1942.93	1942.93	69.2 (M.expect:0.0,M.score:69.2)	22 - 38	K.VWLDPNETNEIANANSR.Q	84486	RL19_HUMAN	60S ribosomal protein L19 OS=Homo sapiens OX=9606 GN=RPL19 PE=1 SV=1	3326		TRUE	10051	1941.92	971.966	1941.92	2	-8.0387e-05	-0.000160774	-0.0827485	6.0273	0.00563846	14.77	0.00982336	43.8839	2	1		1	30.6623	0				CID	/Neuroblastom-Imaging/Imaging-Sample1/ZW_Neuroblastom_E22965-08_3_RA3_01_4008.d/+MS2(971.9662), 53.6eV, 43.9min #12344	ZW_Neuroblastom_E22965-08_3_RA3_01_4008.d	SwissProt-human-oReAlk2019_Mascot_2019-10-14 16:08:34	Protein Search
971.966	0.0407555	1942.93	1942.93	40.3 (M.expect:0.0,M.score:40.3)	22 - 38	K.VWLDPNETNEIANANSR.Q	17806	RL19_HUMAN	60S ribosomal protein L19 OS=Homo sapiens OX=9606 GN=RPL19 PE=1 SV=1	3327		TRUE	7655	1941.92	971.966	1941.92	2	3.9613e-05	7.92259e-05	0.0407766	5.99631	0.00389416	8.0677	0.00562978	43.8469	2	1		1	25.077	0				CID	/Neuroblastom-Imaging/Imaging-Sample1/ZW_Neuroblastom_E22965-08_3_RA3_01_4008.d/+MS2(971.9663), 53.6eV, 43.9min #12338	ZW_Neuroblastom_E22965-08_3_RA3_01_4008.d	SwissProt-human-oReAlk2019_Mascot_2019-10-14 16:08:34	Protein Search
547.643	1.88114	1640.91	1640.91	38.5 (M.expect:0.0,M.score:38.5)	64 - 78	R.VYNVTQHAVGIVVNK.Q	282868	RL21_HUMAN	60S ribosomal protein L21 OS=Homo sapiens OX=9606 GN=RPL21 PE=1 SV=2	2492		TRUE	3376	1639.91	547.642	1639.9	3	0.0010302	0.00309059	1.88345	4.00857	0.00290057	10.7651	0.00800748	31.6727	1	1		1	16.1773	0				CID	/Neuroblastom-Imaging/Imaging-Sample1/ZW_Neuroblastom_E22965-08_3_RA3_01_4008.d/+MS2(547.6432), 26.0eV, 31.7min #8407	ZW_Neuroblastom_E22965-08_3_RA3_01_4008.d	SwissProt-human-oReAlk2019_Mascot_2019-10-14 16:08:34	Protein Search
1039.51	-2.09088	2078.01	2078.02	18.4 (M.expect:0.0,M.score:18.4)	143 - 160	R.TNGKEPELLEPIPYEFMA.-	29200	RL21_HUMAN	60S ribosomal protein L21 OS=Homo sapiens OX=9606 GN=RPL21 PE=1 SV=2	3529		TRUE	12082	2077	1039.51	2077.01	2	-0.00217349	-0.00434698	-2.0919	7.00211	0.00662797	33.5784	0.0141524	63.9709	4	1		1	11.1378	1				CID	/Neuroblastom-Imaging/Imaging-Sample1/ZW_Neuroblastom_E22965-08_3_RA3_01_4008.d/+MS2(1039.5090), 59.0eV, 64.0min #17513	ZW_Neuroblastom_E22965-08_3_RA3_01_4008.d	SwissProt-human-oReAlk2019_Mascot_2019-10-14 16:08:34	Protein Search
1039.51	-1.31167	2078.01	2078.02	20.2 (M.expect:0.0,M.score:20.2)	143 - 160	R.TNGKEPELLEPIPYEFMA.-	57288	RL21_HUMAN	60S ribosomal protein L21 OS=Homo sapiens OX=9606 GN=RPL21 PE=1 SV=2	3530		TRUE	11925	2077.01	1039.51	2077.01	2	-0.00136349	-0.00272698	-1.3123	9.99245	0.00974823	11.8879	0.0127591	63.8578	4	1		1	13.8467	1				CID	/Neuroblastom-Imaging/Imaging-Sample1/ZW_Neuroblastom_E22965-08_3_RA3_01_4008.d/+MS2(1039.5098), 59.0eV, 63.9min #17490	ZW_Neuroblastom_E22965-08_3_RA3_01_4008.d	SwissProt-human-oReAlk2019_Mascot_2019-10-14 16:08:34	Protein Search
1039.51	-0.840292	2078.01	2078.02	18.2 (M.expect:0.0,M.score:18.2)	143 - 160	R.TNGKEPELLEPIPYEFMA.-	53394	RL21_HUMAN	60S ribosomal protein L21 OS=Homo sapiens OX=9606 GN=RPL21 PE=1 SV=2	3531		TRUE	10929	2077.01	1039.51	2077.01	2	-0.000873492	-0.00174698	-0.840699	9.4224	0.00662973	46.181	0.0115237	63.8426	4	1		1	16.3759	1				CID	/Neuroblastom-Imaging/Imaging-Sample1/ZW_Neuroblastom_E22965-08_3_RA3_01_4008.d/+MS2(1039.5103), 59.0eV, 63.8min #17486	ZW_Neuroblastom_E22965-08_3_RA3_01_4008.d	SwissProt-human-oReAlk2019_Mascot_2019-10-14 16:08:34	Protein Search
1039.51	-0.657513	2078.01	2078.02	22.0 (M.expect:0.0,M.score:22.0)	143 - 160	R.TNGKEPELLEPIPYEFMA.-	17252	RL21_HUMAN	60S ribosomal protein L21 OS=Homo sapiens OX=9606 GN=RPL21 PE=1 SV=2	3532		TRUE	14453	2077.01	1039.51	2077.01	2	-0.000683492	-0.00136698	-0.657832	12.7708	0.0103477	15.3885	0.0158033	64.0271	4	1		1	12.0866	1				CID	/Neuroblastom-Imaging/Imaging-Sample1/ZW_Neuroblastom_E22965-08_3_RA3_01_4008.d/+MS2(1039.5105), 59.0eV, 64.0min #17525	ZW_Neuroblastom_E22965-08_3_RA3_01_4008.d	SwissProt-human-oReAlk2019_Mascot_2019-10-14 16:08:34	Protein Search
1047.51	-2.07253	2094.01	2094.01	29.7 (M.expect:0.0,M.score:29.7)	143 - 160	R.TNGKEPELLEPIPYEFMA.-	75400	RL21_HUMAN	60S ribosomal protein L21 OS=Homo sapiens OX=9606 GN=RPL21 PE=1 SV=2	3575		TRUE	12600	2093	1047.51	2093	2	-0.00217099	-0.00434198	-2.07353	19.1542	0.0174654	46.6808	0.0212945	58.7113	5	1		1	14.673	1	Oxidation: 17			CID	/Neuroblastom-Imaging/Imaging-Sample1/ZW_Neuroblastom_E22965-08_3_RA3_01_4008.d/+MS2(1047.5065), 59.8eV, 58.7min #16315	ZW_Neuroblastom_E22965-08_3_RA3_01_4008.d	SwissProt-human-oReAlk2019_Mascot_2019-10-14 16:08:34	Protein Search
1047.51	-1.70977	2094.01	2094.01	36.4 (M.expect:0.0,M.score:36.4)	143 - 160	R.TNGKEPELLEPIPYEFMA.-	39676	RL21_HUMAN	60S ribosomal protein L21 OS=Homo sapiens OX=9606 GN=RPL21 PE=1 SV=2	3576		TRUE	10531	2093	1047.51	2093	2	-0.00179099	-0.00358198	-1.71059	15.0153	0.0134439	26.4388	0.0188705	58.5469	5	1		1	19.4111	1	Oxidation: 17			CID	/Neuroblastom-Imaging/Imaging-Sample1/ZW_Neuroblastom_E22965-08_3_RA3_01_4008.d/+MS2(1047.5068), 59.8eV, 58.5min #16273	ZW_Neuroblastom_E22965-08_3_RA3_01_4008.d	SwissProt-human-oReAlk2019_Mascot_2019-10-14 16:08:34	Protein Search
1047.51	-1.50929	2094.01	2094.01	19.1 (M.expect:0.0,M.score:19.1)	143 - 160	R.TNGKEPELLEPIPYEFMA.-	126972	RL21_HUMAN	60S ribosomal protein L21 OS=Homo sapiens OX=9606 GN=RPL21 PE=1 SV=2	3577		TRUE	10849	2093	1047.51	2093	2	-0.00158099	-0.00316198	-1.51002	10.1952	0.00825014	51.9752	0.0159332	58.5985	5	1		1	17.8029	1	Oxidation: 17			CID	/Neuroblastom-Imaging/Imaging-Sample1/ZW_Neuroblastom_E22965-08_3_RA3_01_4008.d/+MS2(1047.5071), 59.8eV, 58.6min #16285	ZW_Neuroblastom_E22965-08_3_RA3_01_4008.d	SwissProt-human-oReAlk2019_Mascot_2019-10-14 16:08:34	Protein Search
1047.51	-1.49974	2094.01	2094.01	13.6 (M.expect:0.0,M.score:13.6)	143 - 160	R.TNGKEPELLEPIPYEFMA.-	15264	RL21_HUMAN	60S ribosomal protein L21 OS=Homo sapiens OX=9606 GN=RPL21 PE=1 SV=2	3578		TRUE	14184	2093	1047.51	2093	2	-0.00157099	-0.00314198	-1.50046	14.3841	0.0131097	29.0656	0.0173421	58.9731	5	1		1	16.9701	1	Oxidation: 17			CID	/Neuroblastom-Imaging/Imaging-Sample1/ZW_Neuroblastom_E22965-08_3_RA3_01_4008.d/+MS2(1047.5071), 59.8eV, 59.0min #16389	ZW_Neuroblastom_E22965-08_3_RA3_01_4008.d	SwissProt-human-oReAlk2019_Mascot_2019-10-14 16:08:34	Protein Search
1047.51	-1.29927	2094.01	2094.01	16.8 (M.expect:0.0,M.score:16.8)	143 - 160	R.TNGKEPELLEPIPYEFMA.-	110792	RL21_HUMAN	60S ribosomal protein L21 OS=Homo sapiens OX=9606 GN=RPL21 PE=1 SV=2	3579		TRUE	13257	2093	1047.51	2093	2	-0.00136099	-0.00272198	-1.29989	7.827	0.00624733	13.4202	0.0105439	58.661	5	1		1	15.7058	1	Oxidation: 17			CID	/Neuroblastom-Imaging/Imaging-Sample1/ZW_Neuroblastom_E22965-08_3_RA3_01_4008.d/+MS2(1047.5073), 59.8eV, 58.7min #16303	ZW_Neuroblastom_E22965-08_3_RA3_01_4008.d	SwissProt-human-oReAlk2019_Mascot_2019-10-14 16:08:34	Protein Search
621.844	0.762159	1242.68	1242.68	50.3 (M.expect:0.0,M.score:50.3)	53 - 65	K.AGNLGGGVVTIER.S	282912	RL22_HUMAN	60S ribosomal protein L22 OS=Homo sapiens OX=9606 GN=RPL22 PE=1 SV=2	1005		TRUE	5034	1241.67	621.844	1241.67	2	0.000473944	0.000947888	0.762777	3.21009	0.00141709	7.31339	0.00362034	32.1397	2	1		1	44.4284	0				CID	/Neuroblastom-Imaging/Imaging-Sample1/ZW_Neuroblastom_E22965-08_3_RA3_01_4008.d/+MS2(621.8441), 33.0eV, 32.1min #8575	ZW_Neuroblastom_E22965-08_3_RA3_01_4008.d	SwissProt-human-oReAlk2019_Mascot_2019-10-14 16:08:34	Protein Search
621.844	0.77824	1242.68	1242.68	46.3 (M.expect:0.0,M.score:46.3)	53 - 65	K.AGNLGGGVVTIER.S	72368	RL22_HUMAN	60S ribosomal protein L22 OS=Homo sapiens OX=9606 GN=RPL22 PE=1 SV=2	1006		TRUE	3012	1241.67	621.844	1241.67	2	0.000483944	0.000967888	0.778871	8.24414	0.00411788	18.7855	0.00850568	32.094	2	1		1	30.7723	0				CID	/Neuroblastom-Imaging/Imaging-Sample1/ZW_Neuroblastom_E22965-08_3_RA3_01_4008.d/+MS2(621.8442), 33.0eV, 32.1min #8563	ZW_Neuroblastom_E22965-08_3_RA3_01_4008.d	SwissProt-human-oReAlk2019_Mascot_2019-10-14 16:08:34	Protein Search
966.369	-0.017679	1931.73	1931.73	29.2 (M.expect:0.0,M.score:29.2)	114 - 128	R.YFQINQDEEEEEDED.-	45880	RL22_HUMAN	60S ribosomal protein L22 OS=Homo sapiens OX=9606 GN=RPL22 PE=1 SV=2	3290		TRUE	7470	1930.72	966.369	1930.72	2	-1.70844e-05	-3.41688e-05	-0.0176882	9.17773	0.0113744	21.3452	0.0150668	42.7053	1	1		1	10.922	0				CID	/Neuroblastom-Imaging/Imaging-Sample1/ZW_Neuroblastom_E22965-08_3_RA3_01_4008.d/+MS2(966.3687), 53.3eV, 42.7min #12003	ZW_Neuroblastom_E22965-08_3_RA3_01_4008.d	SwissProt-human-oReAlk2019_Mascot_2019-10-14 16:08:34	Protein Search
450.762	2.01407	900.517	900.515	16.9 (M.expect:0.0,M.score:16.9)	114 - 123	K.GSAITGPVAK.E	110424	RL23_HUMAN	60S ribosomal protein L23 OS=Homo sapiens OX=9606 GN=RPL23 PE=1 SV=1	137		TRUE	9165	899.509	450.761	899.508	2	0.000907868	0.00181574	2.01633	3.29419	0.0013065	39.877	0.012671	19.8479	1	1		1	15.3506	0				CID	/Neuroblastom-Imaging/Imaging-Sample1/ZW_Neuroblastom_E22965-08_3_RA3_01_4008.d/+MS2(450.7620), 25.0eV, 19.9min #4104	ZW_Neuroblastom_E22965-08_3_RA3_01_4008.d	SwissProt-human-oReAlk2019_Mascot_2019-10-14 16:08:34	Protein Search
468.755	-0.672926	936.503	936.504	20.5 (M.expect:0.0,M.score:20.5)	116 - 123	K.LYDIDVAK.V	110034	RL23A_HUMAN	60S ribosomal protein L23a OS=Homo sapiens OX=9606 GN=RPL23A PE=1 SV=1	203		TRUE	11595	935.496	468.755	935.496	2	-0.000315438	-0.000630875	-0.67365	4.70421	0.00190283	5.21246	0.00223318	33.0853	1	1		1	10.3526	0				CID	/Neuroblastom-Imaging/Imaging-Sample1/ZW_Neuroblastom_E22965-08_3_RA3_01_4008.d/+MS2(468.7552), 25.8eV, 33.1min #8905	ZW_Neuroblastom_E22965-08_3_RA3_01_4008.d	SwissProt-human-oReAlk2019_Mascot_2019-10-14 16:08:34	Protein Search
702.855	1.41368	1404.7	1404.7	61.9 (M.expect:0.0,M.score:61.9)	140 - 152	R.LAPDYDALDVANK.I	93674	RL23A_HUMAN	60S ribosomal protein L23a OS=Homo sapiens OX=9606 GN=RPL23A PE=1 SV=1	1648		TRUE	8315	1403.7	702.854	1403.69	2	0.000993609	0.00198722	1.41469	5.79503	0.00486069	10.0565	0.00733744	40.2437	2	1		1	35.1527	0				CID	/Neuroblastom-Imaging/Imaging-Sample1/ZW_Neuroblastom_E22965-08_3_RA3_01_4008.d/+MS2(702.8549), 33.3eV, 40.2min #11268	ZW_Neuroblastom_E22965-08_3_RA3_01_4008.d	SwissProt-human-oReAlk2019_Mascot_2019-10-14 16:08:34	Protein Search
702.857	3.74701	1404.71	1404.7	28.8 (M.expect:0.0,M.score:28.8)	140 - 152	R.LAPDYDALDVANK.I	29544	RL23A_HUMAN	60S ribosomal protein L23a OS=Homo sapiens OX=9606 GN=RPL23A PE=1 SV=1	1649		TRUE	4130	1403.7	702.854	1403.69	2	0.00263361	0.00526722	3.74969	3.46531	0.00173998	9.64217	0.0069592	40.2006	2	1		1	25.1032	0				CID	/Neuroblastom-Imaging/Imaging-Sample1/ZW_Neuroblastom_E22965-08_3_RA3_01_4008.d/+MS2(702.8565), 33.3eV, 40.2min #11255	ZW_Neuroblastom_E22965-08_3_RA3_01_4008.d	SwissProt-human-oReAlk2019_Mascot_2019-10-14 16:08:34	Protein Search
900.99	-1.22557	1800.97	1800.97	14.2 (M.expect:0.0,M.score:14.2)	140 - 156	R.LAPDYDALDVANKIGII.-	61536	RL23A_HUMAN	60S ribosomal protein L23a OS=Homo sapiens OX=9606 GN=RPL23A PE=1 SV=1	2994		TRUE	12008	1799.96	900.991	1799.97	2	-0.00110422	-0.00220845	-1.22625	6.49997	0.00481187	8.0542	0.00562089	66.3886	2	1		1	9.50637	1				CID	/Neuroblastom-Imaging/Imaging-Sample1/ZW_Neuroblastom_E22965-08_3_RA3_01_4008.d/+MS2(900.9896), 50.1eV, 66.4min #18014	ZW_Neuroblastom_E22965-08_3_RA3_01_4008.d	SwissProt-human-oReAlk2019_Mascot_2019-10-14 16:08:34	Protein Search
900.99	-1.04798	1800.97	1800.97	29.1 (M.expect:0.0,M.score:29.1)	140 - 156	R.LAPDYDALDVANKIGII.-	63366	RL23A_HUMAN	60S ribosomal protein L23a OS=Homo sapiens OX=9606 GN=RPL23A PE=1 SV=1	2995		TRUE	12238	1799.97	900.991	1799.97	2	-0.000944224	-0.00188845	-1.04857	5.93233	0.00617338	59.2026	0.0123965	66.4078	2	1		1	10.2827	1				CID	/Neuroblastom-Imaging/Imaging-Sample1/ZW_Neuroblastom_E22965-08_3_RA3_01_4008.d/+MS2(900.9898), 50.0eV, 66.4min #18018	ZW_Neuroblastom_E22965-08_3_RA3_01_4008.d	SwissProt-human-oReAlk2019_Mascot_2019-10-14 16:08:34	Protein Search
483.774	-0.0259251	966.541	966.541	26.9 (M.expect:0.0,M.score:26.9)	28 - 35	K.VFQFLNAK.C	138708	RL24_HUMAN	60S ribosomal protein L24 OS=Homo sapiens OX=9606 GN=RPL24 PE=1 SV=1	254		TRUE	11291	965.533	483.774	965.533	2	-1.25419e-05	-2.50838e-05	-0.0259521	4.9644	0.00220795	26.0619	0.0135502	39.1584	1	1		1	16.2811	0				CID	/Neuroblastom-Imaging/Imaging-Sample1/ZW_Neuroblastom_E22965-08_3_RA3_01_4008.d/+MS2(483.7740), 26.4eV, 39.2min #10929	ZW_Neuroblastom_E22965-08_3_RA3_01_4008.d	SwissProt-human-oReAlk2019_Mascot_2019-10-14 16:08:34	Protein Search
596.827	-0.163716	1192.65	1192.65	36.5 (M.expect:0.0,M.score:36.5)	48 - 56	R.QINWTVLYR.R	126904	RL24_HUMAN	60S ribosomal protein L24 OS=Homo sapiens OX=9606 GN=RPL24 PE=1 SV=1	827		TRUE	10758	1191.64	596.827	1191.64	2	-9.77101e-05	-0.00019542	-0.163854	4.46593	0.00227942	5.33604	0.0032564	47.0887	1	1		1	23.9408	0				CID	/Neuroblastom-Imaging/Imaging-Sample1/ZW_Neuroblastom_E22965-08_3_RA3_01_4008.d/+MS2(596.8272), 32.8eV, 47.1min #13236	ZW_Neuroblastom_E22965-08_3_RA3_01_4008.d	SwissProt-human-oReAlk2019_Mascot_2019-10-14 16:08:34	Protein Search
631.344	-0.527404	1261.68	1261.68	70.8 (M.expect:0.0,M.score:70.8)	81 - 93	R.AITGASLADIMAK.R	557528	RL24_HUMAN	60S ribosomal protein L24 OS=Homo sapiens OX=9606 GN=RPL24 PE=1 SV=1	1071		TRUE	2742	1260.67	631.345	1260.67	2	-0.000332973	-0.000665947	-0.527825	3.05613	0.00182745	10.0967	0.00617774	46.5752	2	1		1	39.5679	0				CID	/Neuroblastom-Imaging/Imaging-Sample1/ZW_Neuroblastom_E22965-08_3_RA3_01_4008.d/+MS2(631.3443), 33.0eV, 46.6min #13086	ZW_Neuroblastom_E22965-08_3_RA3_01_4008.d	SwissProt-human-oReAlk2019_Mascot_2019-10-14 16:08:34	Protein Search
631.345	0.185361	1261.68	1261.68	64.5 (M.expect:0.0,M.score:64.5)	81 - 93	R.AITGASLADIMAK.R	175644	RL24_HUMAN	60S ribosomal protein L24 OS=Homo sapiens OX=9606 GN=RPL24 PE=1 SV=1	1072		TRUE	9848	1260.68	631.345	1260.67	2	0.000117027	0.000234053	0.185509	3.73576	0.0017643	5.3424	0.0020821	46.5253	2	1		1	29.1529	0				CID	/Neuroblastom-Imaging/Imaging-Sample1/ZW_Neuroblastom_E22965-08_3_RA3_01_4008.d/+MS2(631.3448), 33.0eV, 46.5min #13071	ZW_Neuroblastom_E22965-08_3_RA3_01_4008.d	SwissProt-human-oReAlk2019_Mascot_2019-10-14 16:08:34	Protein Search
639.342	-0.923565	1277.68	1277.68	64.6 (M.expect:0.0,M.score:64.6)	81 - 93	R.AITGASLADIMAK.R	101752	RL24_HUMAN	60S ribosomal protein L24 OS=Homo sapiens OX=9606 GN=RPL24 PE=1 SV=1	1164		TRUE	8327	1276.67	639.342	1276.67	2	-0.000590473	-0.00118095	-0.924293	4.71719	0.00299827	11.7223	0.00911703	36.6262	1	1		1	22.8589	0	Oxidation: 11			CID	/Neuroblastom-Imaging/Imaging-Sample1/ZW_Neuroblastom_E22965-08_3_RA3_01_4008.d/+MS2(639.3415), 33.0eV, 36.6min #10108	ZW_Neuroblastom_E22965-08_3_RA3_01_4008.d	SwissProt-human-oReAlk2019_Mascot_2019-10-14 16:08:34	Protein Search
480.244	1.88754	959.481	959.479	15.4 (M.expect:0.0,M.score:15.4)	52 - 59	K.DDEVQVVR.G	194528	RL26L_HUMAN	60S ribosomal protein L26-like 1 OS=Homo sapiens OX=9606 GN=RPL26L1 PE=1 SV=1	240		TRUE	7051	958.474	480.243	958.472	2	0.000906481	0.00181296	1.88952	2.92883	0.00125888	3.72094	0.0014884	23.3651	1	1		1	28.537	0				CID	/Neuroblastom-Imaging/Imaging-Sample1/ZW_Neuroblastom_E22965-08_3_RA3_01_4008.d/+MS2(480.2442), 26.2eV, 23.4min #5433	ZW_Neuroblastom_E22965-08_3_RA3_01_4008.d	SwissProt-human-oReAlk2019_Mascot_2019-10-14 16:08:34	Protein Search
541.767	-0.121438	1082.53	1082.53	36.6 (M.expect:0.0,M.score:36.6)	3 - 11	K.FNPFVTSDR.S	91500	RL26L_HUMAN	60S ribosomal protein L26-like 1 OS=Homo sapiens OX=9606 GN=RPL26L1 PE=1 SV=1	525		TRUE	6900	1081.52	541.767	1081.52	2	-6.57913e-05	-0.000131583	-0.121551	20.1675	0.0103783	44.1646	0.0147685	35.9496	2	1		1	31.1965	0				CID	/Neuroblastom-Imaging/Imaging-Sample1/ZW_Neuroblastom_E22965-08_3_RA3_01_4008.d/+MS2(541.7668), 29.5eV, 36.0min #9876	ZW_Neuroblastom_E22965-08_3_RA3_01_4008.d	SwissProt-human-oReAlk2019_Mascot_2019-10-14 16:08:34	Protein Search
541.767	0.838383	1082.53	1082.53	36.4 (M.expect:0.0,M.score:36.4)	3 - 11	K.FNPFVTSDR.S	278360	RL26L_HUMAN	60S ribosomal protein L26-like 1 OS=Homo sapiens OX=9606 GN=RPL26L1 PE=1 SV=1	526		TRUE	5783	1081.52	541.767	1081.52	2	0.000454209	0.000908417	0.839163	7.34124	0.0034677	10.11	0.00526198	35.9978	2	1		1	40.9859	0				CID	/Neuroblastom-Imaging/Imaging-Sample1/ZW_Neuroblastom_E22965-08_3_RA3_01_4008.d/+MS2(541.7674), 29.5eV, 36.0min #9890	ZW_Neuroblastom_E22965-08_3_RA3_01_4008.d	SwissProt-human-oReAlk2019_Mascot_2019-10-14 16:08:34	Protein Search
525.28	0.6003	1049.55	1049.55	28.5 (M.expect:0.0,M.score:28.5)	85 - 93	R.YSVDIPLDK.T	195358	RL27_HUMAN	60S ribosomal protein L27 OS=Homo sapiens OX=9606 GN=RPL27 PE=1 SV=2	455		TRUE	9585	1048.54	525.279	1048.54	2	0.000315325	0.00063065	0.600876	2.59252	0.00129777	4.21165	0.00300259	39.7775	1	1		1	30.3932	0				CID	/Neuroblastom-Imaging/Imaging-Sample1/ZW_Neuroblastom_E22965-08_3_RA3_01_4008.d/+MS2(525.2796), 28.5eV, 39.8min #11116	ZW_Neuroblastom_E22965-08_3_RA3_01_4008.d	SwissProt-human-oReAlk2019_Mascot_2019-10-14 16:08:34	Protein Search
556.327	0.39449	1111.65	1111.65	58.5 (M.expect:0.0,M.score:58.5)	95 - 105	K.TGAAPIIDVVR.S	508240	RL27A_HUMAN	60S ribosomal protein L27a OS=Homo sapiens OX=9606 GN=RPL27A PE=1 SV=2	597		TRUE	3984	1110.64	556.327	1110.64	2	0.000219465	0.000438931	0.394847	3.38888	0.00187865	3.82793	0.00205883	39.9337	1	1		1	62.2943	0				CID	/Neuroblastom-Imaging/Imaging-Sample1/ZW_Neuroblastom_E22965-08_3_RA3_01_4008.d/+MS2(556.3273), 30.4eV, 39.9min #11168	ZW_Neuroblastom_E22965-08_3_RA3_01_4008.d	SwissProt-human-oReAlk2019_Mascot_2019-10-14 16:08:34	Protein Search
451.934	0.989831	1353.79	1353.78	20.8 (M.expect:0.0,M.score:20.8)	93 - 105	K.NKTGAAPIIDVVR.S	130810	RL27A_HUMAN	60S ribosomal protein L27a OS=Homo sapiens OX=9606 GN=RPL27A PE=1 SV=2	1441		TRUE	9664	1352.78	451.933	1352.78	3	0.000447338	0.00134201	0.991304	7.09945	0.00337746	11.4911	0.00504768	29.6908	1	1		1	22.1371	1				CID	/Neuroblastom-Imaging/Imaging-Sample1/ZW_Neuroblastom_E22965-08_3_RA3_01_4008.d/+MS2(451.9336), 24.0eV, 29.7min #7721	ZW_Neuroblastom_E22965-08_3_RA3_01_4008.d	SwissProt-human-oReAlk2019_Mascot_2019-10-14 16:08:34	Protein Search
634.835	5.07646	1268.66	1268.66	35.9 (M.expect:0.0,M.score:35.9)	2 - 11	M.SAHLQWMVVR.N	27938	RL28_HUMAN	60S ribosomal protein L28 OS=Homo sapiens OX=9606 GN=RPL28 PE=1 SV=3	1098		TRUE	6244	1267.66	634.832	1267.65	2	0.00322272	0.00644544	5.08049	4.64438	0.00306213	10.199	0.00944728	46.1221	1	1		1	23.0336	0	Acetyl: 1			CID	/Neuroblastom-Imaging/Imaging-Sample1/ZW_Neuroblastom_E22965-08_3_RA3_01_4008.d/+MS2(634.8353), 33.0eV, 46.1min #12956	ZW_Neuroblastom_E22965-08_3_RA3_01_4008.d	SwissProt-human-oReAlk2019_Mascot_2019-10-14 16:08:34	Protein Search
580.009	1.58919	1738.01	1738.01	38.9 (M.expect:0.0,M.score:38.9)	48 - 65	K.TVGVEPAADGKGVVVVIK.R	143938	RL28_HUMAN	60S ribosomal protein L28 OS=Homo sapiens OX=9606 GN=RPL28 PE=1 SV=3	2793		TRUE	7207	1737.01	580.008	1737	3	0.000921748	0.00276524	1.59104	10.7608	0.00920886	37.7329	0.0175178	40.5487	1	1		1	37.0367	1				CID	/Neuroblastom-Imaging/Imaging-Sample1/ZW_Neuroblastom_E22965-08_3_RA3_01_4008.d/+MS2(580.0094), 26.6eV, 40.6min #11363	ZW_Neuroblastom_E22965-08_3_RA3_01_4008.d	SwissProt-human-oReAlk2019_Mascot_2019-10-14 16:08:34	Protein Search
456.769	0.743924	912.531	912.53	16.4 (M.expect:0.0,M.score:16.4)	96 - 103	R.LAYIAHPK.L	49234	RL29_HUMAN	60S ribosomal protein L29 OS=Homo sapiens OX=9606 GN=RPL29 PE=1 SV=2	159		TRUE	4170	911.524	456.769	911.523	2	0.000339801	0.000679603	0.744745	8.76742	0.00737722	17.2977	0.0150385	18.7131	1	1		1	6.72888	0				CID	/Neuroblastom-Imaging/Imaging-Sample1/ZW_Neuroblastom_E22965-08_3_RA3_01_4008.d/+MS2(456.7691), 25.3eV, 18.7min #3720	ZW_Neuroblastom_E22965-08_3_RA3_01_4008.d	SwissProt-human-oReAlk2019_Mascot_2019-10-14 16:08:34	Protein Search
689.379	1.33016	1377.75	1377.75	39.6 (M.expect:0.0,M.score:39.6)	135 - 149	K.AQAAAPASVPAQAPK.R	494026	RL29_HUMAN	60S ribosomal protein L29 OS=Homo sapiens OX=9606 GN=RPL29 PE=1 SV=2	1548		TRUE	1845	1376.74	689.378	1376.74	2	0.000916986	0.00183397	1.33114	3.66103	0.0023222	11.4706	0.00755777	22.945	2	1		1	57.713	0				CID	/Neuroblastom-Imaging/Imaging-Sample1/ZW_Neuroblastom_E22965-08_3_RA3_01_4008.d/+MS2(689.3788), 33.0eV, 22.9min #5280	ZW_Neuroblastom_E22965-08_3_RA3_01_4008.d	SwissProt-human-oReAlk2019_Mascot_2019-10-14 16:08:34	Protein Search
689.379	1.4172	1377.75	1377.75	53.0 (M.expect:0.0,M.score:53.0)	135 - 149	K.AQAAAPASVPAQAPK.R	105454	RL29_HUMAN	60S ribosomal protein L29 OS=Homo sapiens OX=9606 GN=RPL29 PE=1 SV=2	1549		TRUE	4891	1376.74	689.378	1376.74	2	0.000976986	0.00195397	1.41823	7.00723	0.00390946	8.79788	0.00561419	22.8983	2	1		1	39.7117	0				CID	/Neuroblastom-Imaging/Imaging-Sample1/ZW_Neuroblastom_E22965-08_3_RA3_01_4008.d/+MS2(689.3789), 33.0eV, 22.9min #5268	ZW_Neuroblastom_E22965-08_3_RA3_01_4008.d	SwissProt-human-oReAlk2019_Mascot_2019-10-14 16:08:34	Protein Search
328.519	-0.40436	983.542	983.542	14.7 (M.expect:0.0,M.score:14.7)	11 - 19	R.HGSLGFLPR.K	123980	RL3_HUMAN	60S ribosomal protein L3 OS=Homo sapiens OX=9606 GN=RPL3 PE=1 SV=2	294		TRUE	15508	982.534	328.519	982.535	3	-0.00013284	-0.000398519	-0.405188	7.07163	0.00250103	9.54458	0.00283503	27.6138	1	1		1	26.9644	0				CID	/Neuroblastom-Imaging/Imaging-Sample1/ZW_Neuroblastom_E22965-08_3_RA3_01_4008.d/+MS2(328.5188), 23.0eV, 27.6min #6997	ZW_Neuroblastom_E22965-08_3_RA3_01_4008.d	SwissProt-human-oReAlk2019_Mascot_2019-10-14 16:08:34	Protein Search
671.793	2.1389	1342.58	1342.58	39.3 (M.expect:0.0,M.score:39.3)	301 - 312	K.NNASTDYDLSDK.S	37780	RL3_HUMAN	60S ribosomal protein L3 OS=Homo sapiens OX=9606 GN=RPL3 PE=1 SV=2	1407		TRUE	3113	1341.57	671.792	1341.57	2	0.0014369	0.0028738	2.14051	5.49068	0.00241594	5.94837	0.00310412	21.3288	1	1		1	16.2149	0				CID	/Neuroblastom-Imaging/Imaging-Sample1/ZW_Neuroblastom_E22965-08_3_RA3_01_4008.d/+MS2(671.7929), 33.0eV, 21.3min #4678	ZW_Neuroblastom_E22965-08_3_RA3_01_4008.d	SwissProt-human-oReAlk2019_Mascot_2019-10-14 16:08:34	Protein Search
566.294	0.0859563	1696.87	1696.87	23.7 (M.expect:0.0,M.score:23.7)	178 - 193	K.AHLMEIQVNGGTVAEK.L	57600	RL3_HUMAN	60S ribosomal protein L3 OS=Homo sapiens OX=9606 GN=RPL3 PE=1 SV=2	2667		TRUE	1948	1695.86	566.294	1695.86	3	4.86766e-05	0.00014603	0.0860583	9.07615	0.00723576	12.0456	0.0111746	31.4783	1	1		1	8.62025	0				CID	/Neuroblastom-Imaging/Imaging-Sample1/ZW_Neuroblastom_E22965-08_3_RA3_01_4008.d/+MS2(566.2945), 26.3eV, 31.5min #8345	ZW_Neuroblastom_E22965-08_3_RA3_01_4008.d	SwissProt-human-oReAlk2019_Mascot_2019-10-14 16:08:34	Protein Search
494.776	1.75671	988.544	988.542	40.1 (M.expect:0.0,M.score:40.1)	15 - 23	R.SAINEVVTR.E	142370	RL31_HUMAN	60S ribosomal protein L31 OS=Homo sapiens OX=9606 GN=RPL31 PE=1 SV=1	310		TRUE	8127	987.537	494.775	987.535	2	0.000869177	0.00173835	1.7585	5.94419	0.00204312	7.54767	0.00494808	24.0965	1	1		1	14.5404	0				CID	/Neuroblastom-Imaging/Imaging-Sample1/ZW_Neuroblastom_E22965-08_3_RA3_01_4008.d/+MS2(494.7756), 26.8eV, 24.1min #5705	ZW_Neuroblastom_E22965-08_3_RA3_01_4008.d	SwissProt-human-oReAlk2019_Mascot_2019-10-14 16:08:34	Protein Search
891.779	-2.06252	2673.32	2673.33	25.1 (M.expect:0.0,M.score:25.1)	93 - 115	R.NEDEDSPNKLYTLVTYVPVTTFK.N	16506	RL31_HUMAN	60S ribosomal protein L31 OS=Homo sapiens OX=9606 GN=RPL31 PE=1 SV=1	3878		TRUE	13711	2672.32	891.781	2672.32	3	-0.00183931	-0.00551794	-2.06408	9.02123	0.00499613	12.2279	0.00585183	61.4206	4	1		1	14.3791	1				CID	/Neuroblastom-Imaging/Imaging-Sample1/ZW_Neuroblastom_E22965-08_3_RA3_01_4008.d/+MS2(891.7795), 44.6eV, 61.4min #16975	ZW_Neuroblastom_E22965-08_3_RA3_01_4008.d	SwissProt-human-oReAlk2019_Mascot_2019-10-14 16:08:34	Protein Search
891.78	-1.08694	2673.33	2673.33	38.4 (M.expect:0.0,M.score:38.4)	93 - 115	R.NEDEDSPNKLYTLVTYVPVTTFK.N	31374	RL31_HUMAN	60S ribosomal protein L31 OS=Homo sapiens OX=9606 GN=RPL31 PE=1 SV=1	3879		TRUE	12394	2672.32	891.781	2672.32	3	-0.000969314	-0.00290794	-1.08776	7.34296	0.00512784	8.57816	0.00745337	61.3178	4	1		1	27.0362	1				CID	/Neuroblastom-Imaging/Imaging-Sample1/ZW_Neuroblastom_E22965-08_3_RA3_01_4008.d/+MS2(891.7804), 44.6eV, 61.3min #16950	ZW_Neuroblastom_E22965-08_3_RA3_01_4008.d	SwissProt-human-oReAlk2019_Mascot_2019-10-14 16:08:34	Protein Search
891.781	-0.481412	2673.33	2673.33	27.7 (M.expect:0.0,M.score:27.7)	93 - 115	R.NEDEDSPNKLYTLVTYVPVTTFK.N	29898	RL31_HUMAN	60S ribosomal protein L31 OS=Homo sapiens OX=9606 GN=RPL31 PE=1 SV=1	3880		TRUE	13126	2672.32	891.781	2672.32	3	-0.000429314	-0.00128794	-0.481775	22.3942	0.0128705	29.1887	0.0164006	61.3719	4	1		1	18.1674	1				CID	/Neuroblastom-Imaging/Imaging-Sample1/ZW_Neuroblastom_E22965-08_3_RA3_01_4008.d/+MS2(891.7809), 44.6eV, 61.4min #16964	ZW_Neuroblastom_E22965-08_3_RA3_01_4008.d	SwissProt-human-oReAlk2019_Mascot_2019-10-14 16:08:34	Protein Search
891.781	0.0680505	2673.33	2673.33	44.4 (M.expect:0.0,M.score:44.4)	93 - 115	R.NEDEDSPNKLYTLVTYVPVTTFK.N	15148	RL31_HUMAN	60S ribosomal protein L31 OS=Homo sapiens OX=9606 GN=RPL31 PE=1 SV=1	3881		TRUE	12148	2672.32	891.781	2672.32	3	6.06861e-05	0.000182058	0.0681018	7.17453	0.00524332	7.76022	0.00708911	61.2566	4	1		1	20.3746	1				CID	/Neuroblastom-Imaging/Imaging-Sample1/ZW_Neuroblastom_E22965-08_3_RA3_01_4008.d/+MS2(891.7814), 44.6eV, 61.3min #16931	ZW_Neuroblastom_E22965-08_3_RA3_01_4008.d	SwissProt-human-oReAlk2019_Mascot_2019-10-14 16:08:34	Protein Search
572.341	0.772425	1143.67	1143.67	27.5 (M.expect:0.0,M.score:27.5)	57 - 66	R.VLTVINQTQK.E	153426	RL35_HUMAN	60S ribosomal protein L35 OS=Homo sapiens OX=9606 GN=RPL35 PE=1 SV=2	694		TRUE	5145	1142.67	572.34	1142.67	2	0.00044209	0.00088418	0.773105	5.33417	0.00385043	8.81268	0.00806369	25.6785	1	1		1	16.7921	0				CID	/Neuroblastom-Imaging/Imaging-Sample1/ZW_Neuroblastom_E22965-08_3_RA3_01_4008.d/+MS2(572.3407), 31.3eV, 25.7min #6285	ZW_Neuroblastom_E22965-08_3_RA3_01_4008.d	SwissProt-human-oReAlk2019_Mascot_2019-10-14 16:08:34	Protein Search
519.626	0.448707	1556.86	1556.86	31.2 (M.expect:0.0,M.score:31.2)	20 - 32	K.QLDDLKVELSQLR.V	40106	RL35_HUMAN	60S ribosomal protein L35 OS=Homo sapiens OX=9606 GN=RPL35 PE=1 SV=2	2130		TRUE	7999	1555.86	519.626	1555.86	3	0.00023316	0.000699481	0.449288	5.0543	0.00259651	15.4149	0.00575955	44.8013	1	1		1	16.6684	1				CID	/Neuroblastom-Imaging/Imaging-Sample1/ZW_Neuroblastom_E22965-08_3_RA3_01_4008.d/+MS2(519.6265), 25.4eV, 44.8min #12595	ZW_Neuroblastom_E22965-08_3_RA3_01_4008.d	SwissProt-human-oReAlk2019_Mascot_2019-10-14 16:08:34	Protein Search
489.776	0.677961	978.545	978.544	23.0 (M.expect:0.0,M.score:23.0)	103 - 110	R.VMLYPSRI.-	180368	RL35A_HUMAN	60S ribosomal protein L35a OS=Homo sapiens OX=9606 GN=RPL35A PE=1 SV=2	282		TRUE	9978	977.537	489.776	977.537	2	0.000332049	0.000664098	0.678659	5.72238	0.00336952	16.0129	0.0148259	37.5	1	1		1	34.5995	1				CID	/Neuroblastom-Imaging/Imaging-Sample1/ZW_Neuroblastom_E22965-08_3_RA3_01_4008.d/+MS2(489.7760), 26.6eV, 37.5min #10393	ZW_Neuroblastom_E22965-08_3_RA3_01_4008.d	SwissProt-human-oReAlk2019_Mascot_2019-10-14 16:08:34	Protein Search
616.819	0.563595	1232.63	1232.63	49.9 (M.expect:0.0,M.score:49.9)	88 - 98	R.EELSNVLAAMR.K	206232	RL36_HUMAN	60S ribosomal protein L36 OS=Homo sapiens OX=9606 GN=RPL36 PE=1 SV=3	974		TRUE	7366	1231.62	616.819	1231.62	2	0.000347636	0.000695273	0.564056	3.66701	0.00195103	4.09946	0.00227352	47.7039	2	1		1	41.3322	0				CID	/Neuroblastom-Imaging/Imaging-Sample1/ZW_Neuroblastom_E22965-08_3_RA3_01_4008.d/+MS2(616.8192), 33.0eV, 47.7min #13403	ZW_Neuroblastom_E22965-08_3_RA3_01_4008.d	SwissProt-human-oReAlk2019_Mascot_2019-10-14 16:08:34	Protein Search
616.82	1.34178	1232.63	1232.63	42.7 (M.expect:0.0,M.score:42.7)	88 - 98	R.EELSNVLAAMR.K	58890	RL36_HUMAN	60S ribosomal protein L36 OS=Homo sapiens OX=9606 GN=RPL36 PE=1 SV=3	975		TRUE	7810	1231.62	616.819	1231.62	2	0.000827636	0.00165527	1.34288	4.36404	0.00284533	11.629	0.00662374	47.6549	2	1		1	33.8076	0				CID	/Neuroblastom-Imaging/Imaging-Sample1/ZW_Neuroblastom_E22965-08_3_RA3_01_4008.d/+MS2(616.8196), 33.0eV, 47.7min #13391	ZW_Neuroblastom_E22965-08_3_RA3_01_4008.d	SwissProt-human-oReAlk2019_Mascot_2019-10-14 16:08:34	Protein Search
609.648	0.0998723	1826.93	1826.93	28.0 (M.expect:0.0,M.score:28.0)	63 - 80	K.TVAGGAWTYNTTSAVTVK.S	23706	RL37A_HUMAN	60S ribosomal protein L37a OS=Homo sapiens OX=9606 GN=RPL37A PE=1 SV=2	3027		TRUE	2243	1825.92	609.648	1825.92	3	6.08869e-05	0.000182661	0.0999825	6.57046	0.00312075	8.82206	0.00359485	39.3739	2	1		1	7.6048	0				CID	/Neuroblastom-Imaging/Imaging-Sample1/ZW_Neuroblastom_E22965-08_3_RA3_01_4008.d/+MS2(609.6477), 27.0eV, 39.4min #10996	ZW_Neuroblastom_E22965-08_3_RA3_01_4008.d	SwissProt-human-oReAlk2019_Mascot_2019-10-14 16:08:34	Protein Search
913.967	-0.613199	1826.93	1826.93	64.1 (M.expect:0.0,M.score:64.1)	63 - 80	K.TVAGGAWTYNTTSAVTVK.S	61424	RL37A_HUMAN	60S ribosomal protein L37a OS=Homo sapiens OX=9606 GN=RPL37A PE=1 SV=2	3028		TRUE	6267	1825.92	913.968	1825.92	2	-0.000560443	-0.00112089	-0.613537	8.08534	0.00465443	12.6703	0.0103364	39.3643	2	1		1	16.9771	0				CID	/Neuroblastom-Imaging/Imaging-Sample1/ZW_Neuroblastom_E22965-08_3_RA3_01_4008.d/+MS2(913.9672), 50.7eV, 39.4min #10990	ZW_Neuroblastom_E22965-08_3_RA3_01_4008.d	SwissProt-human-oReAlk2019_Mascot_2019-10-14 16:08:34	Protein Search
478.781	1.51175	956.554	956.552	30.5 (M.expect:0.0,M.score:30.5)	354 - 364	K.AAAAAAALQAK.S	604490	RL4_HUMAN	60S ribosomal protein L4 OS=Homo sapiens OX=9606 GN=RPL4 PE=1 SV=5	236		TRUE	3381	955.547	478.78	955.545	2	0.000723799	0.0014476	1.51335	1.827	0.000890552	3.04195	0.00236051	19.6866	2	1		1	42.4259	0				CID	/Neuroblastom-Imaging/Imaging-Sample1/ZW_Neuroblastom_E22965-08_3_RA3_01_4008.d/+MS2(478.7805), 26.2eV, 19.7min #4043	ZW_Neuroblastom_E22965-08_3_RA3_01_4008.d	SwissProt-human-oReAlk2019_Mascot_2019-10-14 16:08:34	Protein Search
478.781	2.28455	956.555	956.552	35.2 (M.expect:0.0,M.score:35.2)	354 - 364	K.AAAAAAALQAK.S	158588	RL4_HUMAN	60S ribosomal protein L4 OS=Homo sapiens OX=9606 GN=RPL4 PE=1 SV=5	237		TRUE	6822	955.547	478.78	955.545	2	0.0010938	0.0021876	2.28696	11.7433	0.00932942	13.5666	0.0114082	19.6348	2	1		1	26.7835	0				CID	/Neuroblastom-Imaging/Imaging-Sample1/ZW_Neuroblastom_E22965-08_3_RA3_01_4008.d/+MS2(478.7809), 26.2eV, 19.6min #4025	ZW_Neuroblastom_E22965-08_3_RA3_01_4008.d	SwissProt-human-oReAlk2019_Mascot_2019-10-14 16:08:34	Protein Search
494.795	0.859044	988.583	988.583	28.4 (M.expect:0.0,M.score:28.4)	21 - 29	K.NVTLPAVFK.A	138726	RL4_HUMAN	60S ribosomal protein L4 OS=Homo sapiens OX=9606 GN=RPL4 PE=1 SV=5	311		TRUE	11427	987.576	494.795	987.575	2	0.000425051	0.000850102	0.859919	5.36363	0.00265333	7.22293	0.00296095	43.5806	1	1		1	23.1554	0				CID	/Neuroblastom-Imaging/Imaging-Sample1/ZW_Neuroblastom_E22965-08_3_RA3_01_4008.d/+MS2(494.7954), 26.8eV, 43.6min #12254	ZW_Neuroblastom_E22965-08_3_RA3_01_4008.d	SwissProt-human-oReAlk2019_Mascot_2019-10-14 16:08:34	Protein Search
804.939	-1.66312	1608.87	1608.87	27.6 (M.expect:0.0,M.score:27.6)	144 - 157	R.IEEVPELPLVVEDK.V	63790	RL4_HUMAN	60S ribosomal protein L4 OS=Homo sapiens OX=9606 GN=RPL4 PE=1 SV=5	2322		TRUE	12015	1607.86	804.94	1607.87	2	-0.00133871	-0.00267742	-1.66416	6.01129	0.00399402	7.79895	0.00523729	56.4468	4	1		1	29.358	0				CID	/Neuroblastom-Imaging/Imaging-Sample1/ZW_Neuroblastom_E22965-08_3_RA3_01_4008.d/+MS2(804.9388), 45.2eV, 56.5min #15747	ZW_Neuroblastom_E22965-08_3_RA3_01_4008.d	SwissProt-human-oReAlk2019_Mascot_2019-10-14 16:08:34	Protein Search
804.939	-1.52646	1608.87	1608.87	43.1 (M.expect:0.0,M.score:43.1)	144 - 157	R.IEEVPELPLVVEDK.V	70910	RL4_HUMAN	60S ribosomal protein L4 OS=Homo sapiens OX=9606 GN=RPL4 PE=1 SV=5	2323		TRUE	13647	1607.86	804.94	1607.87	2	-0.00122871	-0.00245742	-1.52742	5.76287	0.00402743	9.04838	0.00969109	56.5017	4	1		1	25.5398	0				CID	/Neuroblastom-Imaging/Imaging-Sample1/ZW_Neuroblastom_E22965-08_3_RA3_01_4008.d/+MS2(804.9389), 45.2eV, 56.5min #15762	ZW_Neuroblastom_E22965-08_3_RA3_01_4008.d	SwissProt-human-oReAlk2019_Mascot_2019-10-14 16:08:34	Protein Search
804.939	-1.2283	1608.87	1608.87	29.2 (M.expect:0.0,M.score:29.2)	144 - 157	R.IEEVPELPLVVEDK.V	36470	RL4_HUMAN	60S ribosomal protein L4 OS=Homo sapiens OX=9606 GN=RPL4 PE=1 SV=5	2324		TRUE	14700	1607.86	804.94	1607.87	2	-0.000988709	-0.00197742	-1.22907	9.62222	0.00809667	11.6778	0.00963486	56.559	4	1		1	25.7666	0				CID	/Neuroblastom-Imaging/Imaging-Sample1/ZW_Neuroblastom_E22965-08_3_RA3_01_4008.d/+MS2(804.9392), 45.2eV, 56.6min #15779	ZW_Neuroblastom_E22965-08_3_RA3_01_4008.d	SwissProt-human-oReAlk2019_Mascot_2019-10-14 16:08:34	Protein Search
804.94	-0.184746	1608.87	1608.87	42.3 (M.expect:0.0,M.score:42.3)	144 - 157	R.IEEVPELPLVVEDK.V	27038	RL4_HUMAN	60S ribosomal protein L4 OS=Homo sapiens OX=9606 GN=RPL4 PE=1 SV=5	2325		TRUE	11374	1607.87	804.94	1607.87	2	-0.000148709	-0.000297419	-0.184862	5.60772	0.00315412	6.62522	0.00617081	56.4041	4	1		1	32.2942	0				CID	/Neuroblastom-Imaging/Imaging-Sample1/ZW_Neuroblastom_E22965-08_3_RA3_01_4008.d/+MS2(804.9400), 45.2eV, 56.4min #15739	ZW_Neuroblastom_E22965-08_3_RA3_01_4008.d	SwissProt-human-oReAlk2019_Mascot_2019-10-14 16:08:34	Protein Search
679.827	2.17023	2716.29	2716.28	59.2 (M.expect:0.0,M.score:59.2)	47 - 71	K.NNRQPYAVSELAGHQTSAESWGTGR.A	111868	RL4_HUMAN	60S ribosomal protein L4 OS=Homo sapiens OX=9606 GN=RPL4 PE=1 SV=5	3885		TRUE	4909	2715.28	679.826	2715.27	4	0.00147538	0.00590152	2.17264	4.75968	0.00441135	6.17736	0.00622547	31.1474	1	1		1	23.8709	1				CID	/Neuroblastom-Imaging/Imaging-Sample1/ZW_Neuroblastom_E22965-08_3_RA3_01_4008.d/+MS2(679.8275), 27.0eV, 31.1min #8229	ZW_Neuroblastom_E22965-08_3_RA3_01_4008.d	SwissProt-human-oReAlk2019_Mascot_2019-10-14 16:08:34	Protein Search
469.734	3.80714	938.461	938.458	19.6 (M.expect:0.0,M.score:19.6)	240 - 246	K.YEITEQR.K	218562	RL6_HUMAN	60S ribosomal protein L6 OS=Homo sapiens OX=9606 GN=RPL6 PE=1 SV=3	205		TRUE	4672	937.454	469.733	937.451	2	0.00178834	0.00357668	3.81122	4.58237	0.00250969	11.056	0.00689422	19.2715	1	1		1	24.5535	0				CID	/Neuroblastom-Imaging/Imaging-Sample1/ZW_Neuroblastom_E22965-08_3_RA3_01_4008.d/+MS2(469.7343), 25.8eV, 19.3min #3899	ZW_Neuroblastom_E22965-08_3_RA3_01_4008.d	SwissProt-human-oReAlk2019_Mascot_2019-10-14 16:08:34	Protein Search
579.836	0.650629	1158.66	1158.66	23.1 (M.expect:0.0,M.score:23.1)	263 - 272	K.AIPQLQGYLR.S	504516	RL6_HUMAN	60S ribosomal protein L6 OS=Homo sapiens OX=9606 GN=RPL6 PE=1 SV=3	732		TRUE	3088	1157.66	579.835	1157.66	2	0.000377258	0.000754516	0.651195	27.7414	0.00837396	37.602	0.0133381	42.3407	1	1		1	48.3372	0				CID	/Neuroblastom-Imaging/Imaging-Sample1/ZW_Neuroblastom_E22965-08_3_RA3_01_4008.d/+MS2(579.8355), 31.8eV, 42.3min #11889	ZW_Neuroblastom_E22965-08_3_RA3_01_4008.d	SwissProt-human-oReAlk2019_Mascot_2019-10-14 16:08:34	Protein Search
541.808	0.204335	1082.61	1082.61	16.0 (M.expect:0.0,M.score:16.0)	10 - 19	K.EVPAVPETLK.K	551068	RL7_HUMAN	60S ribosomal protein L7 OS=Homo sapiens OX=9606 GN=RPL7 PE=1 SV=1	527		TRUE	2351	1081.6	541.808	1081.6	2	0.00011071	0.000221421	0.204525	23.3749	0.0142697	29.2588	0.0175421	33.9115	1	1		1	38.2687	0				CID	/Neuroblastom-Imaging/Imaging-Sample1/ZW_Neuroblastom_E22965-08_3_RA3_01_4008.d/+MS2(541.8083), 29.5eV, 33.9min #9186	ZW_Neuroblastom_E22965-08_3_RA3_01_4008.d	SwissProt-human-oReAlk2019_Mascot_2019-10-14 16:08:34	Protein Search
585.846	0.414053	1170.68	1170.68	53.1 (M.expect:0.0,M.score:53.1)	167 - 177	R.IALTDNALIAR.S	330698	RL7_HUMAN	60S ribosomal protein L7 OS=Homo sapiens OX=9606 GN=RPL7 PE=1 SV=1	768		TRUE	6626	1169.68	585.846	1169.68	2	0.000242571	0.000485143	0.41441	5.59336	0.00319993	9.21399	0.00561799	41.9381	1	1		1	45.8193	0				CID	/Neuroblastom-Imaging/Imaging-Sample1/ZW_Neuroblastom_E22965-08_3_RA3_01_4008.d/+MS2(585.8459), 32.2eV, 41.9min #11776	ZW_Neuroblastom_E22965-08_3_RA3_01_4008.d	SwissProt-human-oReAlk2019_Mascot_2019-10-14 16:08:34	Protein Search
633.318	-1.82452	1265.63	1265.63	16.1 (M.expect:0.0,M.score:16.1)	203 - 212	K.EANNFLWPFK.L	20672	RL7_HUMAN	60S ribosomal protein L7 OS=Homo sapiens OX=9606 GN=RPL7 PE=1 SV=1	1086		TRUE	14589	1264.62	633.319	1264.62	2	-0.0011555	-0.00231101	-1.82597	10.7612	0.00817586	32.3222	0.0147613	58.5162	4	1		1	14.8673	0				CID	/Neuroblastom-Imaging/Imaging-Sample1/ZW_Neuroblastom_E22965-08_3_RA3_01_4008.d/+MS2(633.3182), 33.0eV, 58.5min #16271	ZW_Neuroblastom_E22965-08_3_RA3_01_4008.d	SwissProt-human-oReAlk2019_Mascot_2019-10-14 16:08:34	Protein Search
633.318	-1.66662	1265.63	1265.63	34.5 (M.expect:0.0,M.score:34.5)	203 - 212	K.EANNFLWPFK.L	29868	RL7_HUMAN	60S ribosomal protein L7 OS=Homo sapiens OX=9606 GN=RPL7 PE=1 SV=1	1087		TRUE	13076	1264.62	633.319	1264.62	2	-0.0010555	-0.00211101	-1.66795	4.81055	0.00330722	6.77944	0.00620894	58.4599	4	1		1	23.8492	0				CID	/Neuroblastom-Imaging/Imaging-Sample1/ZW_Neuroblastom_E22965-08_3_RA3_01_4008.d/+MS2(633.3182), 33.0eV, 58.5min #16257	ZW_Neuroblastom_E22965-08_3_RA3_01_4008.d	SwissProt-human-oReAlk2019_Mascot_2019-10-14 16:08:34	Protein Search
633.318	-1.46135	1265.63	1265.63	45.2 (M.expect:0.0,M.score:45.2)	203 - 212	K.EANNFLWPFK.L	27924	RL7_HUMAN	60S ribosomal protein L7 OS=Homo sapiens OX=9606 GN=RPL7 PE=1 SV=1	1088		TRUE	12635	1264.62	633.319	1264.62	2	-0.000925503	-0.00185101	-1.46252	6.05664	0.00388893	7.48568	0.00422576	58.4026	4	1		1	28.4733	0				CID	/Neuroblastom-Imaging/Imaging-Sample1/ZW_Neuroblastom_E22965-08_3_RA3_01_4008.d/+MS2(633.3184), 33.0eV, 58.4min #16242	ZW_Neuroblastom_E22965-08_3_RA3_01_4008.d	SwissProt-human-oReAlk2019_Mascot_2019-10-14 16:08:34	Protein Search
633.319	-0.198166	1265.63	1265.63	16.1 (M.expect:0.0,M.score:16.1)	203 - 212	K.EANNFLWPFK.L	18600	RL7_HUMAN	60S ribosomal protein L7 OS=Homo sapiens OX=9606 GN=RPL7 PE=1 SV=1	1089		TRUE	13472	1264.62	633.319	1264.62	2	-0.000125503	-0.000251005	-0.198324	8.51099	0.00620786	20.0814	0.012107	58.3519	4	1		1	19.8068	0				CID	/Neuroblastom-Imaging/Imaging-Sample1/ZW_Neuroblastom_E22965-08_3_RA3_01_4008.d/+MS2(633.3192), 33.0eV, 58.4min #16230	ZW_Neuroblastom_E22965-08_3_RA3_01_4008.d	SwissProt-human-oReAlk2019_Mascot_2019-10-14 16:08:34	Protein Search
831.947	-0.926894	1662.89	1662.89	24.4 (M.expect:0.0,M.score:24.4)	135 - 148	R.IVEPYIAWGYPNLK.S	22446	RL7_HUMAN	60S ribosomal protein L7 OS=Homo sapiens OX=9606 GN=RPL7 PE=1 SV=1	2562		TRUE	12849	1661.88	831.948	1661.88	2	-0.000771127	-0.00154225	-0.927456	32.525	0.0149788	44.1169	0.017906	56.8949	1	1		1	14.6255	0				CID	/Neuroblastom-Imaging/Imaging-Sample1/ZW_Neuroblastom_E22965-08_3_RA3_01_4008.d/+MS2(831.9474), 46.6eV, 56.9min #15861	ZW_Neuroblastom_E22965-08_3_RA3_01_4008.d	SwissProt-human-oReAlk2019_Mascot_2019-10-14 16:08:34	Protein Search
426.272	1.83988	851.536	851.535	15.9 (M.expect:0.0,M.score:15.9)	12 - 20	K.VAPAPAVVK.K	255196	RL7A_HUMAN	60S ribosomal protein L7a OS=Homo sapiens OX=9606 GN=RPL7A PE=1 SV=2	85		TRUE	8592	850.529	426.271	850.528	2	0.000784288	0.00156858	1.84205	10.8446	0.00704073	19.9487	0.00894571	21.535	1	1		1	43.5515	0				CID	/Neuroblastom-Imaging/Imaging-Sample1/ZW_Neuroblastom_E22965-08_3_RA3_01_4008.d/+MS2(426.2719), 24.1eV, 21.5min #4755	ZW_Neuroblastom_E22965-08_3_RA3_01_4008.d	SwissProt-human-oReAlk2019_Mascot_2019-10-14 16:08:34	Protein Search
608.82	0.772571	1216.63	1216.63	23.0 (M.expect:0.0,M.score:23.0)	38 - 48	K.NFGIGQDIQPK.R	417600	RL7A_HUMAN	60S ribosomal protein L7a OS=Homo sapiens OX=9606 GN=RPL7A PE=1 SV=2	918		TRUE	2708	1215.63	608.82	1215.62	2	0.000470357	0.000940713	0.773211	8.67313	0.00510409	20.8112	0.0124532	34.5954	1	1		1	30.8968	0				CID	/Neuroblastom-Imaging/Imaging-Sample1/ZW_Neuroblastom_E22965-08_3_RA3_01_4008.d/+MS2(608.8201), 33.0eV, 34.6min #9422	ZW_Neuroblastom_E22965-08_3_RA3_01_4008.d	SwissProt-human-oReAlk2019_Mascot_2019-10-14 16:08:34	Protein Search
604.344	-0.715442	1811.02	1811.02	39.9 (M.expect:0.0,M.score:39.9)	74 - 89	R.LKVPPAINQFTQALDR.Q	64764	RL7A_HUMAN	60S ribosomal protein L7a OS=Homo sapiens OX=9606 GN=RPL7A PE=1 SV=2	3009		TRUE	6673	1810.01	604.344	1810.01	3	-0.000432373	-0.00129712	-0.716238	3.26975	0.00224088	19.1219	0.0100419	49.6511	1	1		1	25.8075	1				CID	/Neuroblastom-Imaging/Imaging-Sample1/ZW_Neuroblastom_E22965-08_3_RA3_01_4008.d/+MS2(604.3436), 27.0eV, 49.7min #13928	ZW_Neuroblastom_E22965-08_3_RA3_01_4008.d	SwissProt-human-oReAlk2019_Mascot_2019-10-14 16:08:34	Protein Search
350.23	2.02468	699.453	699.451	28.8 (M.expect:0.0,M.score:28.8)	235 - 241	K.VGLIAAR.R	99850	RL8_HUMAN	60S ribosomal protein L8 OS=Homo sapiens OX=9606 GN=RPL8 PE=1 SV=2	7		TRUE	14243	698.445	350.229	698.444	2	0.000709103	0.00141821	2.02759	4.77675	0.0013223	8.04023	0.00218894	24.1503	1	1		1	34.2869	0				CID	/Neuroblastom-Imaging/Imaging-Sample1/ZW_Neuroblastom_E22965-08_3_RA3_01_4008.d/+MS2(350.2299), 23.0eV, 24.2min #5727	ZW_Neuroblastom_E22965-08_3_RA3_01_4008.d	SwissProt-human-oReAlk2019_Mascot_2019-10-14 16:08:34	Protein Search
404.204	2.37484	807.401	807.4	22.1 (M.expect:0.0,M.score:22.1)	31 - 37	R.AVDFAER.H	372710	RL8_HUMAN	60S ribosomal protein L8 OS=Homo sapiens OX=9606 GN=RPL8 PE=1 SV=2	42		TRUE	9145	806.394	404.203	806.392	2	0.000959923	0.00191985	2.37781	4.34129	0.00149551	5.79617	0.00183233	21.3753	1	1		1	40.5397	0				CID	/Neuroblastom-Imaging/Imaging-Sample1/ZW_Neuroblastom_E22965-08_3_RA3_01_4008.d/+MS2(404.2044), 23.2eV, 21.4min #4689	ZW_Neuroblastom_E22965-08_3_RA3_01_4008.d	SwissProt-human-oReAlk2019_Mascot_2019-10-14 16:08:34	Protein Search
471.281	1.13865	941.554	941.553	28.4 (M.expect:0.0,M.score:28.4)	164 - 174	R.AVVGVVAGGGR.I	79614	RL8_HUMAN	60S ribosomal protein L8 OS=Homo sapiens OX=9606 GN=RPL8 PE=1 SV=2	212		TRUE	4698	940.546	471.28	940.545	2	0.000536623	0.00107325	1.13987	2.85465	0.00107214	3.06725	0.00118569	23.0548	2	1		1	32.4381	0				CID	/Neuroblastom-Imaging/Imaging-Sample1/ZW_Neuroblastom_E22965-08_3_RA3_01_4008.d/+MS2(471.2805), 25.9eV, 23.1min #5325	ZW_Neuroblastom_E22965-08_3_RA3_01_4008.d	SwissProt-human-oReAlk2019_Mascot_2019-10-14 16:08:34	Protein Search
471.281	2.98468	941.556	941.553	16.4 (M.expect:0.0,M.score:16.4)	164 - 174	R.AVVGVVAGGGR.I	566494	RL8_HUMAN	60S ribosomal protein L8 OS=Homo sapiens OX=9606 GN=RPL8 PE=1 SV=2	213		TRUE	2329	940.548	471.28	940.545	2	0.00140662	0.00281325	2.98787	5.1545	0.00158217	13.6594	0.0077401	23.1021	2	1		1	46.9458	0				CID	/Neuroblastom-Imaging/Imaging-Sample1/ZW_Neuroblastom_E22965-08_3_RA3_01_4008.d/+MS2(471.2814), 25.9eV, 23.1min #5337	ZW_Neuroblastom_E22965-08_3_RA3_01_4008.d	SwissProt-human-oReAlk2019_Mascot_2019-10-14 16:08:34	Protein Search
563.614	1.99175	1688.83	1688.82	13.3 (M.expect:0.0,M.score:13.3)	129 - 144	R.ASGNYATVISHNPETK.K	325656	RL8_HUMAN	60S ribosomal protein L8 OS=Homo sapiens OX=9606 GN=RPL8 PE=1 SV=2	2619		TRUE	3043	1687.82	563.613	1687.82	3	0.00112258	0.00336773	1.99412	11.4672	0.0076743	17.5386	0.0116954	22.6884	1	1		1	5.75497	0				CID	/Neuroblastom-Imaging/Imaging-Sample1/ZW_Neuroblastom_E22965-08_3_RA3_01_4008.d/+MS2(563.6139), 26.3eV, 22.7min #5186	ZW_Neuroblastom_E22965-08_3_RA3_01_4008.d	SwissProt-human-oReAlk2019_Mascot_2019-10-14 16:08:34	Protein Search
796.407	-0.437885	1591.81	1591.81	30.7 (M.expect:0.0,M.score:30.7)	120 - 136	K.GILFVGSGVSGGEEGAR.Y	88254	6PGD_HUMAN	6-phosphogluconate dehydrogenase, decarboxylating OS=Homo sapiens OX=9606 GN=PGD PE=1 SV=3	2256		TRUE	6649	1590.8	796.407	1590.8	2	-0.000348735	-0.00069747	-0.438162	4.6314	0.00422026	31.3314	0.0174609	43.3206	1	1		1	19.0689	0				CID	/Neuroblastom-Imaging/Imaging-Sample1/ZW_Neuroblastom_E22965-08_3_RA3_01_4008.d/+MS2(796.4070), 44.6eV, 43.3min #12175	ZW_Neuroblastom_E22965-08_3_RA3_01_4008.d	SwissProt-human-oReAlk2019_Mascot_2019-10-14 16:08:34	Protein Search
473.254	1.58215	945.501	945.5	25.2 (M.expect:0.0,M.score:25.2)	21 - 28	K.ELVLDNSR.S	188538	AN32A_HUMAN	Acidic leucine-rich nuclear phosphoprotein 32 family member A OS=Homo sapiens OX=9606 GN=ANP32A PE=1 SV=1	219		TRUE	7061	944.494	473.254	944.493	2	0.000748759	0.00149752	1.58384	4.16802	0.00139132	5.06979	0.00297768	24.6255	1	1		1	28.9853	0				CID	/Neuroblastom-Imaging/Imaging-Sample1/ZW_Neuroblastom_E22965-08_3_RA3_01_4008.d/+MS2(473.2544), 25.9eV, 24.6min #5913	ZW_Neuroblastom_E22965-08_3_RA3_01_4008.d	SwissProt-human-oReAlk2019_Mascot_2019-10-14 16:08:34	Protein Search
801.399	-0.478791	1601.79	1601.79	31.2 (M.expect:0.0,M.score:31.2)	634 - 648	R.NAVTQEFGPVPDTAR.Y	34972	ACON_HUMAN	Aconitate hydratase, mitochondrial OS=Homo sapiens OX=9606 GN=ACO2 PE=1 SV=2	2284		TRUE	8798	1600.78	801.4	1600.78	2	-0.000383703	-0.000767406	-0.479092	5.99217	0.00390081	7.8995	0.00526162	37.1963	1	1		1	20.8971	0				CID	/Neuroblastom-Imaging/Imaging-Sample1/ZW_Neuroblastom_E22965-08_3_RA3_01_4008.d/+MS2(801.3992), 45.1eV, 37.2min #10294	ZW_Neuroblastom_E22965-08_3_RA3_01_4008.d	SwissProt-human-oReAlk2019_Mascot_2019-10-14 16:08:34	Protein Search
488.728	1.12408	976.449	976.448	33.4 (M.expect:0.0,M.score:33.4)	21 - 30	K.AGFAGDDAPR.A	7150162	ACTA_HUMAN	Actin, aortic smooth muscle OS=Homo sapiens OX=9606 GN=ACTA2 PE=1 SV=1	276		TRUE	81	975.442	488.728	975.441	2	0.000549369	0.00109874	1.12524	3.8442	0.00179098	15.334	0.0120615	19.8952	2	1		1	69.0897	0				CID	/Neuroblastom-Imaging/Imaging-Sample1/ZW_Neuroblastom_E22965-08_3_RA3_01_4008.d/+MS2(488.7283), 26.5eV, 19.9min #4120	ZW_Neuroblastom_E22965-08_3_RA3_01_4008.d	SwissProt-human-oReAlk2019_Mascot_2019-10-14 16:08:34	Protein Search
488.729	1.67653	976.45	976.448	45.6 (M.expect:0.0,M.score:45.6)	21 - 30	K.AGFAGDDAPR.A	1072352	ACTA_HUMAN	Actin, aortic smooth muscle OS=Homo sapiens OX=9606 GN=ACTA2 PE=1 SV=1	278		TRUE	983	975.443	488.728	975.441	2	0.000819369	0.00163874	1.67826	7.40907	0.00370932	21.4781	0.00789096	19.844	2	1		1	61.1271	0				CID	/Neuroblastom-Imaging/Imaging-Sample1/ZW_Neuroblastom_E22965-08_3_RA3_01_4008.d/+MS2(488.7286), 26.5eV, 19.8min #4097	ZW_Neuroblastom_E22965-08_3_RA3_01_4008.d	SwissProt-human-oReAlk2019_Mascot_2019-10-14 16:08:34	Protein Search
499.747	0.313907	998.487	998.486	19.5 (M.expect:0.0,M.score:19.5)	186 - 193	R.DLTDYLMK.I	62342	ACTA_HUMAN	Actin, aortic smooth muscle OS=Homo sapiens OX=9606 GN=ACTA2 PE=1 SV=1	331		TRUE	10880	997.479	499.747	997.479	2	0.000156874	0.000313748	0.314224	7.85049	0.00302124	11.0415	0.00577801	51.178	2	1		1	18.0924	0				CID	/Neuroblastom-Imaging/Imaging-Sample1/ZW_Neuroblastom_E22965-08_3_RA3_01_4008.d/+MS2(499.7470), 27.0eV, 51.2min #14332	ZW_Neuroblastom_E22965-08_3_RA3_01_4008.d	SwissProt-human-oReAlk2019_Mascot_2019-10-14 16:08:34	Protein Search
499.748	1.8947	998.488	998.486	20.0 (M.expect:0.0,M.score:20.0)	186 - 193	R.DLTDYLMK.I	8646	ACTA_HUMAN	Actin, aortic smooth muscle OS=Homo sapiens OX=9606 GN=ACTA2 PE=1 SV=1	332		TRUE	11963	997.481	499.747	997.479	2	0.000946874	0.00189375	1.89662	3.62405	0.00185841	4.25654	0.00259023	51.1432	2	1		1	18.842	0				CID	/Neuroblastom-Imaging/Imaging-Sample1/ZW_Neuroblastom_E22965-08_3_RA3_01_4008.d/+MS2(499.7477), 27.0eV, 51.2min #14328	ZW_Neuroblastom_E22965-08_3_RA3_01_4008.d	SwissProt-human-oReAlk2019_Mascot_2019-10-14 16:08:34	Protein Search
507.745	0.983514	1014.48	1014.48	16.5 (M.expect:0.0,M.score:16.5)	186 - 193	R.DLTDYLMK.I	125760	ACTA_HUMAN	Actin, aortic smooth muscle OS=Homo sapiens OX=9606 GN=ACTA2 PE=1 SV=1	361		TRUE	10123	1013.47	507.744	1013.47	2	0.000499374	0.000998748	0.984491	7.19695	0.00448931	9.36339	0.0076061	42.9075	1	1		1	13.3985	0	Oxidation: 7			CID	/Neuroblastom-Imaging/Imaging-Sample1/ZW_Neuroblastom_E22965-08_3_RA3_01_4008.d/+MS2(507.7447), 27.5eV, 42.9min #12061	ZW_Neuroblastom_E22965-08_3_RA3_01_4008.d	SwissProt-human-oReAlk2019_Mascot_2019-10-14 16:08:34	Protein Search
565.778	1.43081	1130.55	1130.55	28.1 (M.expect:0.0,M.score:28.1)	199 - 208	R.GYSFVTTAER.E	163398	ACTA_HUMAN	Actin, aortic smooth muscle OS=Homo sapiens OX=9606 GN=ACTA2 PE=1 SV=1	647		TRUE	2255	1129.54	565.777	1129.54	2	0.000809522	0.00161904	1.43209	12.403	0.0100622	25.186	0.015632	29.5363	1	1		1	19.9018	0				CID	/Neuroblastom-Imaging/Imaging-Sample1/ZW_Neuroblastom_E22965-08_3_RA3_01_4008.d/+MS2(565.7783), 30.9eV, 29.5min #7670	ZW_Neuroblastom_E22965-08_3_RA3_01_4008.d	SwissProt-human-oReAlk2019_Mascot_2019-10-14 16:08:34	Protein Search
581.313	0.13499	1161.62	1161.62	35.0 (M.expect:0.0,M.score:35.0)	318 - 328	K.EITALAPSTMK.I	604444	ACTA_HUMAN	Actin, aortic smooth muscle OS=Homo sapiens OX=9606 GN=ACTA2 PE=1 SV=1	737		TRUE	1222	1160.61	581.313	1160.61	2	7.84714e-05	0.000156943	0.135107	2.96286	0.00142065	7.43671	0.00433799	33.6519	2	1		1	38.1746	0				CID	/Neuroblastom-Imaging/Imaging-Sample1/ZW_Neuroblastom_E22965-08_3_RA3_01_4008.d/+MS2(581.3129), 31.9eV, 33.7min #9093	ZW_Neuroblastom_E22965-08_3_RA3_01_4008.d	SwissProt-human-oReAlk2019_Mascot_2019-10-14 16:08:34	Protein Search
581.313	0.444634	1161.62	1161.62	34.8 (M.expect:0.0,M.score:34.8)	318 - 328	K.EITALAPSTMK.I	1941540	ACTA_HUMAN	Actin, aortic smooth muscle OS=Homo sapiens OX=9606 GN=ACTA2 PE=1 SV=1	739		TRUE	242	1160.61	581.313	1160.61	2	0.000258471	0.000516943	0.445019	3.59905	0.00316417	7.89842	0.00523312	33.7018	2	1		1	44.2529	0				CID	/Neuroblastom-Imaging/Imaging-Sample1/ZW_Neuroblastom_E22965-08_3_RA3_01_4008.d/+MS2(581.3131), 31.9eV, 33.7min #9110	ZW_Neuroblastom_E22965-08_3_RA3_01_4008.d	SwissProt-human-oReAlk2019_Mascot_2019-10-14 16:08:34	Protein Search
586.29	1.53874	1171.57	1171.57	51.1 (M.expect:0.0,M.score:51.1)	42 - 52	R.HQGVMVGMGQK.D	212130	ACTA_HUMAN	Actin, aortic smooth muscle OS=Homo sapiens OX=9606 GN=ACTA2 PE=1 SV=1	771		TRUE	5691	1170.57	586.289	1170.56	2	0.000902145	0.00180429	1.54006	5.83405	0.00401295	8.42109	0.00626523	18.8641	1	1		1	25.7998	0				CID	/Neuroblastom-Imaging/Imaging-Sample1/ZW_Neuroblastom_E22965-08_3_RA3_01_4008.d/+MS2(586.2901), 32.2eV, 18.9min #3770	ZW_Neuroblastom_E22965-08_3_RA3_01_4008.d	SwissProt-human-oReAlk2019_Mascot_2019-10-14 16:08:34	Protein Search
589.309	-2.83218	1177.61	1177.61	14.2 (M.expect:0.0,M.score:14.2)	318 - 328	K.EITALAPSTMK.I	54814	ACTA_HUMAN	Actin, aortic smooth muscle OS=Homo sapiens OX=9606 GN=ACTA2 PE=1 SV=1	791		TRUE	1526	1176.6	589.31	1176.61	2	-0.00166903	-0.00333806	-2.8346	6.30354	0.00376642	17.9059	0.0122828	31.0043	3	1		1	8.26492	0	Oxidation: 10			CID	/Neuroblastom-Imaging/Imaging-Sample1/ZW_Neuroblastom_E22965-08_3_RA3_01_4008.d/+MS2(589.3086), 26.8eV, 31.0min #8187	ZW_Neuroblastom_E22965-08_3_RA3_01_4008.d	SwissProt-human-oReAlk2019_Mascot_2019-10-14 16:08:34	Protein Search
589.311	0.731314	1177.61	1177.61	32.6 (M.expect:0.0,M.score:32.6)	318 - 328	K.EITALAPSTMK.I	232154	ACTA_HUMAN	Actin, aortic smooth muscle OS=Homo sapiens OX=9606 GN=ACTA2 PE=1 SV=1	794		TRUE	2857	1176.61	589.31	1176.61	2	0.000430971	0.000861943	0.73194	4.69484	0.00257851	5.47442	0.00366238	27.2989	3	1		1	22.5715	0	Oxidation: 10			CID	/Neuroblastom-Imaging/Imaging-Sample1/ZW_Neuroblastom_E22965-08_3_RA3_01_4008.d/+MS2(589.3107), 32.4eV, 27.3min #6896	ZW_Neuroblastom_E22965-08_3_RA3_01_4008.d	SwissProt-human-oReAlk2019_Mascot_2019-10-14 16:08:34	Protein Search
589.311	1.13857	1177.61	1177.61	50.3 (M.expect:0.0,M.score:50.3)	318 - 328	K.EITALAPSTMK.I	1137390	ACTA_HUMAN	Actin, aortic smooth muscle OS=Homo sapiens OX=9606 GN=ACTA2 PE=1 SV=1	795		TRUE	525	1176.61	589.31	1176.61	2	0.000670971	0.00134194	1.13954	2.43008	0.00115202	2.86165	0.00137699	27.3526	3	1		1	30.8709	0	Oxidation: 10			CID	/Neuroblastom-Imaging/Imaging-Sample1/ZW_Neuroblastom_E22965-08_3_RA3_01_4008.d/+MS2(589.3110), 32.4eV, 27.4min #6914	ZW_Neuroblastom_E22965-08_3_RA3_01_4008.d	SwissProt-human-oReAlk2019_Mascot_2019-10-14 16:08:34	Protein Search
599.766	1.43884	1198.52	1198.52	42.5 (M.expect:0.0,M.score:42.5)	53 - 63	K.DSYVGDEAQSK.R	1164654	ACTA_HUMAN	Actin, aortic smooth muscle OS=Homo sapiens OX=9606 GN=ACTA2 PE=1 SV=1	843		TRUE	664	1197.52	599.765	1197.51	2	0.000862967	0.00172593	1.44005	4.70288	0.00221896	6.89484	0.00345673	15.6072	4	1		1	43.8199	0				CID	/Neuroblastom-Imaging/Imaging-Sample1/ZW_Neuroblastom_E22965-08_3_RA3_01_4008.d/+MS2(599.7656), 33.0eV, 15.6min #2766	ZW_Neuroblastom_E22965-08_3_RA3_01_4008.d	SwissProt-human-oReAlk2019_Mascot_2019-10-14 16:08:34	Protein Search
599.766	1.53888	1198.52	1198.52	37.2 (M.expect:0.0,M.score:37.2)	53 - 63	K.DSYVGDEAQSK.R	297864	ACTA_HUMAN	Actin, aortic smooth muscle OS=Homo sapiens OX=9606 GN=ACTA2 PE=1 SV=1	844		TRUE	3697	1197.52	599.765	1197.51	2	0.000922967	0.00184593	1.54017	3.65605	0.0014975	15.2488	0.0125118	18.1891	4	1		1	31.815	0				CID	/Neuroblastom-Imaging/Imaging-Sample1/ZW_Neuroblastom_E22965-08_3_RA3_01_4008.d/+MS2(599.7657), 33.0eV, 18.2min #3548	ZW_Neuroblastom_E22965-08_3_RA3_01_4008.d	SwissProt-human-oReAlk2019_Mascot_2019-10-14 16:08:34	Protein Search
599.766	2.10577	1198.52	1198.52	33.5 (M.expect:0.0,M.score:33.5)	53 - 63	K.DSYVGDEAQSK.R	57428	ACTA_HUMAN	Actin, aortic smooth muscle OS=Homo sapiens OX=9606 GN=ACTA2 PE=1 SV=1	847		TRUE	4154	1197.52	599.765	1197.51	2	0.00126297	0.00252593	2.10754	18.4077	0.0138226	31.797	0.0185901	18.0334	4	1		1	17.3065	0				CID	/Neuroblastom-Imaging/Imaging-Sample1/ZW_Neuroblastom_E22965-08_3_RA3_01_4008.d/+MS2(599.7660), 33.0eV, 18.0min #3502	ZW_Neuroblastom_E22965-08_3_RA3_01_4008.d	SwissProt-human-oReAlk2019_Mascot_2019-10-14 16:08:34	Protein Search
599.766	2.28917	1198.52	1198.52	35.5 (M.expect:0.0,M.score:35.5)	53 - 63	K.DSYVGDEAQSK.R	376850	ACTA_HUMAN	Actin, aortic smooth muscle OS=Homo sapiens OX=9606 GN=ACTA2 PE=1 SV=1	848		TRUE	4402	1197.52	599.765	1197.51	2	0.00137297	0.00274593	2.29109	2.64578	0.00111802	2.96688	0.00152268	15.5587	4	1		1	36.9678	0				CID	/Neuroblastom-Imaging/Imaging-Sample1/ZW_Neuroblastom_E22965-08_3_RA3_01_4008.d/+MS2(599.7661), 33.0eV, 15.6min #2752	ZW_Neuroblastom_E22965-08_3_RA3_01_4008.d	SwissProt-human-oReAlk2019_Mascot_2019-10-14 16:08:34	Protein Search
400.24	1.02817	1198.71	1198.71	69.9 (M.expect:0.0,M.score:69.9)	31 - 41	R.AVFPSIVGRPR.H	12302432	ACTA_HUMAN	Actin, aortic smooth muscle OS=Homo sapiens OX=9606 GN=ACTA2 PE=1 SV=1	859		TRUE	856	1197.7	400.24	1197.7	3	0.000411516	0.00123455	1.0299	5.32061	0.00209289	6.87833	0.00275441	31.8259	4	1		1	52.2947	0				CID	/Neuroblastom-Imaging/Imaging-Sample1/ZW_Neuroblastom_E22965-08_3_RA3_01_4008.d/+MS2(400.2404), 23.0eV, 31.8min #8461	ZW_Neuroblastom_E22965-08_3_RA3_01_4008.d	SwissProt-human-oReAlk2019_Mascot_2019-10-14 16:08:34	Protein Search
400.24	1.17808	1198.71	1198.71	22.8 (M.expect:0.0,M.score:22.8)	31 - 41	R.AVFPSIVGRPR.H	6610722	ACTA_HUMAN	Actin, aortic smooth muscle OS=Homo sapiens OX=9606 GN=ACTA2 PE=1 SV=1	863		TRUE	8884	1197.7	400.24	1197.7	3	0.000471516	0.00141455	1.18006	5.01671	0.00264716	8.1541	0.00378781	31.7773	4	1		1	12.5493	0				CID	/Neuroblastom-Imaging/Imaging-Sample1/ZW_Neuroblastom_E22965-08_3_RA3_01_4008.d/+MS2(400.2405), 23.0eV, 31.8min #8449	ZW_Neuroblastom_E22965-08_3_RA3_01_4008.d	SwissProt-human-oReAlk2019_Mascot_2019-10-14 16:08:34	Protein Search
400.241	1.32799	1198.71	1198.71	68.0 (M.expect:0.0,M.score:68.0)	31 - 41	R.AVFPSIVGRPR.H	2450366	ACTA_HUMAN	Actin, aortic smooth muscle OS=Homo sapiens OX=9606 GN=ACTA2 PE=1 SV=1	867		TRUE	8310	1197.7	400.24	1197.7	3	0.000531516	0.00159455	1.33022	5.82339	0.00158479	9.96112	0.00385072	31.7211	4	1		1	42.044	0				CID	/Neuroblastom-Imaging/Imaging-Sample1/ZW_Neuroblastom_E22965-08_3_RA3_01_4008.d/+MS2(400.2406), 23.0eV, 31.7min #8422	ZW_Neuroblastom_E22965-08_3_RA3_01_4008.d	SwissProt-human-oReAlk2019_Mascot_2019-10-14 16:08:34	Protein Search
599.857	0.417599	1198.71	1198.71	50.2 (M.expect:0.0,M.score:50.2)	31 - 41	R.AVFPSIVGRPR.H	781768	ACTA_HUMAN	Actin, aortic smooth muscle OS=Homo sapiens OX=9606 GN=ACTA2 PE=1 SV=1	869		TRUE	1161	1197.7	599.856	1197.7	2	0.000250499	0.000500999	0.41795	5.0186	0.00200975	6.2196	0.00239596	31.8276	4	1		1	63.2411	0				CID	/Neuroblastom-Imaging/Imaging-Sample1/ZW_Neuroblastom_E22965-08_3_RA3_01_4008.d/+MS2(599.8566), 33.0eV, 31.8min #8464	ZW_Neuroblastom_E22965-08_3_RA3_01_4008.d	SwissProt-human-oReAlk2019_Mascot_2019-10-14 16:08:34	Protein Search
452.214	2.51242	1354.63	1354.62	43.5 (M.expect:0.0,M.score:43.5)	53 - 64	K.DSYVGDEAQSKR.G	818354	ACTA_HUMAN	Actin, aortic smooth muscle OS=Homo sapiens OX=9606 GN=ACTA2 PE=1 SV=1	1443		TRUE	1113	1353.62	452.213	1353.62	3	0.00113615	0.00340845	2.51616	6.83855	0.0075531	16.84	0.0139224	14.8443	4	1		1	26.0967	1				CID	/Neuroblastom-Imaging/Imaging-Sample1/ZW_Neuroblastom_E22965-08_3_RA3_01_4008.d/+MS2(452.2138), 25.1eV, 14.9min #2533	ZW_Neuroblastom_E22965-08_3_RA3_01_4008.d	SwissProt-human-oReAlk2019_Mascot_2019-10-14 16:08:34	Protein Search
452.214	2.91046	1354.63	1354.62	35.0 (M.expect:0.0,M.score:35.0)	53 - 64	K.DSYVGDEAQSKR.G	852842	ACTA_HUMAN	Actin, aortic smooth muscle OS=Homo sapiens OX=9606 GN=ACTA2 PE=1 SV=1	1446		TRUE	1349	1353.62	452.213	1353.62	3	0.00131615	0.00394845	2.91479	10.1333	0.00544405	25.1332	0.0119828	14.6754	4	1		1	30.8382	1				CID	/Neuroblastom-Imaging/Imaging-Sample1/ZW_Neuroblastom_E22965-08_3_RA3_01_4008.d/+MS2(452.2139), 24.0eV, 14.7min #2465	ZW_Neuroblastom_E22965-08_3_RA3_01_4008.d	SwissProt-human-oReAlk2019_Mascot_2019-10-14 16:08:34	Protein Search
452.214	3.44118	1354.63	1354.62	14.5 (M.expect:0.0,M.score:14.5)	53 - 64	K.DSYVGDEAQSKR.G	231996	ACTA_HUMAN	Actin, aortic smooth muscle OS=Homo sapiens OX=9606 GN=ACTA2 PE=1 SV=1	1447		TRUE	1945	1353.62	452.213	1353.62	3	0.00155615	0.00466845	3.4463	8.46387	0.00362615	29.8433	0.0153992	14.5675	4	1		1	9.98681	1				CID	/Neuroblastom-Imaging/Imaging-Sample1/ZW_Neuroblastom_E22965-08_3_RA3_01_4008.d/+MS2(452.2142), 24.0eV, 14.6min #2406	ZW_Neuroblastom_E22965-08_3_RA3_01_4008.d	SwissProt-human-oReAlk2019_Mascot_2019-10-14 16:08:34	Protein Search
677.816	0.999465	1354.62	1354.62	27.3 (M.expect:0.0,M.score:27.3)	53 - 64	K.DSYVGDEAQSKR.G	120684	ACTA_HUMAN	Actin, aortic smooth muscle OS=Homo sapiens OX=9606 GN=ACTA2 PE=1 SV=1	1449		TRUE	4644	1353.62	677.815	1353.62	2	0.000677453	0.00135491	1.00021	12.161	0.009233	74.6731	0.0156827	14.6253	4	1		1	37.5391	1				CID	/Neuroblastom-Imaging/Imaging-Sample1/ZW_Neuroblastom_E22965-08_3_RA3_01_4008.d/+MS2(677.8160), 33.0eV, 14.6min #2443	ZW_Neuroblastom_E22965-08_3_RA3_01_4008.d	SwissProt-human-oReAlk2019_Mascot_2019-10-14 16:08:34	Protein Search
597.636	0.216502	1790.89	1790.89	32.8 (M.expect:0.0,M.score:32.8)	241 - 256	K.SYELPDGQVITIGNER.F	38100	ACTA_HUMAN	Actin, aortic smooth muscle OS=Homo sapiens OX=9606 GN=ACTA2 PE=1 SV=1	2973		TRUE	8037	1789.89	597.635	1789.88	3	0.000129389	0.000388167	0.216745	2.44006	0.00163763	2.86533	0.00226558	48.4252	6	1		1	24.682	0				CID	/Neuroblastom-Imaging/Imaging-Sample1/ZW_Neuroblastom_E22965-08_3_RA3_01_4008.d/+MS2(597.6356), 27.0eV, 48.4min #13594	ZW_Neuroblastom_E22965-08_3_RA3_01_4008.d	SwissProt-human-oReAlk2019_Mascot_2019-10-14 16:08:34	Protein Search
597.636	0.969468	1790.89	1790.89	42.1 (M.expect:0.0,M.score:42.1)	241 - 256	K.SYELPDGQVITIGNER.F	168924	ACTA_HUMAN	Actin, aortic smooth muscle OS=Homo sapiens OX=9606 GN=ACTA2 PE=1 SV=1	2976		TRUE	7890	1789.89	597.635	1789.88	3	0.000579389	0.00173817	0.970559	4.03815	0.003123	4.64974	0.00378987	49.5449	6	1		1	27.9554	0				CID	/Neuroblastom-Imaging/Imaging-Sample1/ZW_Neuroblastom_E22965-08_3_RA3_01_4008.d/+MS2(597.6361), 27.0eV, 49.5min #13894	ZW_Neuroblastom_E22965-08_3_RA3_01_4008.d	SwissProt-human-oReAlk2019_Mascot_2019-10-14 16:08:34	Protein Search
895.949	-0.443876	1790.89	1790.89	88.3 (M.expect:0.0,M.score:88.3)	241 - 256	K.SYELPDGQVITIGNER.F	862606	ACTA_HUMAN	Actin, aortic smooth muscle OS=Homo sapiens OX=9606 GN=ACTA2 PE=1 SV=1	2978		TRUE	421	1789.88	895.95	1789.88	2	-0.00039769	-0.000795381	-0.444126	2.36885	0.00150925	9.99108	0.011759	48.3815	6	1		1	51.8662	0				CID	/Neuroblastom-Imaging/Imaging-Sample1/ZW_Neuroblastom_E22965-08_3_RA3_01_4008.d/+MS2(895.9492), 49.9eV, 48.4min #13582	ZW_Neuroblastom_E22965-08_3_RA3_01_4008.d	SwissProt-human-oReAlk2019_Mascot_2019-10-14 16:08:34	Protein Search
895.949	-0.421553	1790.89	1790.89	97.7 (M.expect:0.0,M.score:97.7)	241 - 256	K.SYELPDGQVITIGNER.F	2551632	ACTA_HUMAN	Actin, aortic smooth muscle OS=Homo sapiens OX=9606 GN=ACTA2 PE=1 SV=1	2981		TRUE	134	1789.88	895.95	1789.88	2	-0.00037769	-0.000755381	-0.42179	3.02848	0.00316768	8.01575	0.00600088	49.5461	6	1		1	55.6633	0				CID	/Neuroblastom-Imaging/Imaging-Sample1/ZW_Neuroblastom_E22965-08_3_RA3_01_4008.d/+MS2(895.9492), 49.9eV, 49.5min #13895	ZW_Neuroblastom_E22965-08_3_RA3_01_4008.d	SwissProt-human-oReAlk2019_Mascot_2019-10-14 16:08:34	Protein Search
895.949	-0.421553	1790.89	1790.89	71.6 (M.expect:0.0,M.score:71.6)	241 - 256	K.SYELPDGQVITIGNER.F	2551632	ACTA_HUMAN	Actin, aortic smooth muscle OS=Homo sapiens OX=9606 GN=ACTA2 PE=1 SV=1	2982		TRUE	209	1789.88	895.95	1789.88	2	-0.00037769	-0.000755381	-0.42179	2.10751	0.00158284	6.4959	0.00672403	49.5443	6	1		1	58.8732	0				CID	/Neuroblastom-Imaging/Imaging-Sample1/ZW_Neuroblastom_E22965-08_3_RA3_01_4008.d/+MS2(895.9492), 49.8eV, 49.5min #13893	ZW_Neuroblastom_E22965-08_3_RA3_01_4008.d	SwissProt-human-oReAlk2019_Mascot_2019-10-14 16:08:34	Protein Search
895.95	0.0807073	1790.89	1790.89	91.5 (M.expect:0.0,M.score:91.5)	241 - 256	K.SYELPDGQVITIGNER.F	523584	ACTA_HUMAN	Actin, aortic smooth muscle OS=Homo sapiens OX=9606 GN=ACTA2 PE=1 SV=1	2989		TRUE	2440	1789.88	895.95	1789.88	2	7.23097e-05	0.000144619	0.0807527	2.70546	0.00179981	5.77819	0.00238465	48.3183	6	1		1	56.5299	0				CID	/Neuroblastom-Imaging/Imaging-Sample1/ZW_Neuroblastom_E22965-08_3_RA3_01_4008.d/+MS2(895.9497), 49.8eV, 48.3min #13562	ZW_Neuroblastom_E22965-08_3_RA3_01_4008.d	SwissProt-human-oReAlk2019_Mascot_2019-10-14 16:08:34	Protein Search
652.687	0.714254	1956.05	1956.04	85.5 (M.expect:0.0,M.score:85.5)	98 - 115	R.VAPEEHPTLLTEAPLNPK.A	1492470	ACTA_HUMAN	Actin, aortic smooth muscle OS=Homo sapiens OX=9606 GN=ACTA2 PE=1 SV=1	3362		TRUE	157	1955.04	652.686	1955.04	3	0.000466184	0.00139855	0.71499	2.84212	0.00290855	10.16	0.00844243	38.0713	1	1		1	54.4692	0				CID	/Neuroblastom-Imaging/Imaging-Sample1/ZW_Neuroblastom_E22965-08_3_RA3_01_4008.d/+MS2(652.6865), 27.0eV, 38.1min #10580	ZW_Neuroblastom_E22965-08_3_RA3_01_4008.d	SwissProt-human-oReAlk2019_Mascot_2019-10-14 16:08:34	Protein Search
698.692	-0.256087	2094.06	2094.06	23.1 (M.expect:0.0,M.score:23.1)	241 - 258	K.SYELPDGQVITIGNERFR.C	19550	ACTA_HUMAN	Actin, aortic smooth muscle OS=Homo sapiens OX=9606 GN=ACTA2 PE=1 SV=1	3582		TRUE	8510	2093.05	698.692	2093.05	3	-0.000178926	-0.000536777	-0.256333	7.69124	0.00459537	19.9487	0.0117941	47.2037	1	1		1	33.5387	1				CID	/Neuroblastom-Imaging/Imaging-Sample1/ZW_Neuroblastom_E22965-08_3_RA3_01_4008.d/+MS2(698.6918), 27.0eV, 47.2min #13269	ZW_Neuroblastom_E22965-08_3_RA3_01_4008.d	SwissProt-human-oReAlk2019_Mascot_2019-10-14 16:08:34	Protein Search
743.36	0.591222	2228.07	2228.07	21.3 (M.expect:0.0,M.score:21.3)	294 - 314	K.DLYANNVLSGGTTMYPGIADR.M	18856	ACTA_HUMAN	Actin, aortic smooth muscle OS=Homo sapiens OX=9606 GN=ACTA2 PE=1 SV=1	3704		TRUE	13556	2227.06	743.36	2227.06	3	0.000439491	0.00131847	0.591757	3.71829	0.00208697	8.48603	0.00742307	58.1591	4	1		1	14.7839	0				CID	/Neuroblastom-Imaging/Imaging-Sample1/ZW_Neuroblastom_E22965-08_3_RA3_01_4008.d/+MS2(743.3604), 32.7eV, 58.2min #16185	ZW_Neuroblastom_E22965-08_3_RA3_01_4008.d	SwissProt-human-oReAlk2019_Mascot_2019-10-14 16:08:34	Protein Search
1114.53	-1.95825	2228.06	2228.07	30.9 (M.expect:0.0,M.score:30.9)	294 - 314	K.DLYANNVLSGGTTMYPGIADR.M	11090	ACTA_HUMAN	Actin, aortic smooth muscle OS=Homo sapiens OX=9606 GN=ACTA2 PE=1 SV=1	3705		TRUE	15261	2227.05	1114.54	2227.06	2	-0.00218254	-0.00436507	-1.95914	11.9294	0.00842427	16.0703	0.0107252	58.261	4	1		1	16.7513	0				CID	/Neuroblastom-Imaging/Imaging-Sample1/ZW_Neuroblastom_E22965-08_3_RA3_01_4008.d/+MS2(1114.5341), 65.0eV, 58.3min #16211	ZW_Neuroblastom_E22965-08_3_RA3_01_4008.d	SwissProt-human-oReAlk2019_Mascot_2019-10-14 16:08:34	Protein Search
1114.53	-1.69805	2228.06	2228.07	41.6 (M.expect:0.0,M.score:41.6)	294 - 314	K.DLYANNVLSGGTTMYPGIADR.M	21132	ACTA_HUMAN	Actin, aortic smooth muscle OS=Homo sapiens OX=9606 GN=ACTA2 PE=1 SV=1	3706		TRUE	14415	2227.05	1114.54	2227.06	2	-0.00189254	-0.00378507	-1.69882	3.75607	0.00359637	6.26747	0.006717	58.2019	4	1		1	17.8979	0				CID	/Neuroblastom-Imaging/Imaging-Sample1/ZW_Neuroblastom_E22965-08_3_RA3_01_4008.d/+MS2(1114.5343), 65.0eV, 58.2min #16194	ZW_Neuroblastom_E22965-08_3_RA3_01_4008.d	SwissProt-human-oReAlk2019_Mascot_2019-10-14 16:08:34	Protein Search
1114.53	-1.6173	2228.06	2228.07	47.9 (M.expect:0.0,M.score:47.9)	294 - 314	K.DLYANNVLSGGTTMYPGIADR.M	34778	ACTA_HUMAN	Actin, aortic smooth muscle OS=Homo sapiens OX=9606 GN=ACTA2 PE=1 SV=1	3707		TRUE	13211	2227.05	1114.54	2227.06	2	-0.00180254	-0.00360507	-1.61803	6.10235	0.00476073	10.5774	0.00671183	58.1461	4	1		1	21.299	0				CID	/Neuroblastom-Imaging/Imaging-Sample1/ZW_Neuroblastom_E22965-08_3_RA3_01_4008.d/+MS2(1114.5344), 65.0eV, 58.2min #16178	ZW_Neuroblastom_E22965-08_3_RA3_01_4008.d	SwissProt-human-oReAlk2019_Mascot_2019-10-14 16:08:34	Protein Search
748.692	0.121756	2244.06	2244.06	63.4 (M.expect:0.0,M.score:63.4)	294 - 314	K.DLYANNVLSGGTTMYPGIADR.M	52354	ACTA_HUMAN	Actin, aortic smooth muscle OS=Homo sapiens OX=9606 GN=ACTA2 PE=1 SV=1	3719		TRUE	10132	2243.05	748.692	2243.05	3	9.1158e-05	0.000273474	0.121866	6.49171	0.00482531	7.86143	0.00650168	53.2303	2	1		1	22.5977	0	Oxidation: 14			CID	/Neuroblastom-Imaging/Imaging-Sample1/ZW_Neuroblastom_E22965-08_3_RA3_01_4008.d/+MS2(748.6917), 33.4eV, 53.2min #14878	ZW_Neuroblastom_E22965-08_3_RA3_01_4008.d	SwissProt-human-oReAlk2019_Mascot_2019-10-14 16:08:34	Protein Search
1122.53	-0.285102	2244.06	2244.06	31.7 (M.expect:0.0,M.score:31.7)	294 - 314	K.DLYANNVLSGGTTMYPGIADR.M	73292	ACTA_HUMAN	Actin, aortic smooth muscle OS=Homo sapiens OX=9606 GN=ACTA2 PE=1 SV=1	3720		TRUE	12919	2243.05	1122.53	2243.05	2	-0.000320037	-0.000640074	-0.28523	15.3616	0.00860611	18.2343	0.014151	53.228	2	1		1	15.3132	0	Oxidation: 14			CID	/Neuroblastom-Imaging/Imaging-Sample1/ZW_Neuroblastom_E22965-08_3_RA3_01_4008.d/+MS2(1122.5334), 65.0eV, 53.2min #14876	ZW_Neuroblastom_E22965-08_3_RA3_01_4008.d	SwissProt-human-oReAlk2019_Mascot_2019-10-14 16:08:34	Protein Search
786.058	0.0744034	2356.16	2356.16	23.7 (M.expect:0.0,M.score:23.7)	293 - 314	R.KDLYANNVLSGGTTMYPGIADR.M	14856	ACTA_HUMAN	Actin, aortic smooth muscle OS=Homo sapiens OX=9606 GN=ACTA2 PE=1 SV=1	3761		TRUE	10505	2355.15	786.058	2355.15	3	5.84854e-05	0.000175456	0.074467	7.98444	0.00542417	29.6679	0.0114925	45.5168	1	1		1	11.2629	1				CID	/Neuroblastom-Imaging/Imaging-Sample1/ZW_Neuroblastom_E22965-08_3_RA3_01_4008.d/+MS2(786.0583), 43.2eV, 45.5min #12788	ZW_Neuroblastom_E22965-08_3_RA3_01_4008.d	SwissProt-human-oReAlk2019_Mascot_2019-10-14 16:08:34	Protein Search
651.336	0.513819	2602.32	2602.32	23.8 (M.expect:0.0,M.score:23.8)	65 - 86	R.GILTLKYPIEHGIITNWDDMEK.I	15022	ACTA_HUMAN	Actin, aortic smooth muscle OS=Homo sapiens OX=9606 GN=ACTA2 PE=1 SV=1	3867		TRUE	8268	2601.32	651.336	2601.31	4	0.000334669	0.00133868	0.514416	5.11074	0.00326809	6.11804	0.00848229	49.0557	1	1		1	10.5412	1	Oxidation: 20			CID	/Neuroblastom-Imaging/Imaging-Sample1/ZW_Neuroblastom_E22965-08_3_RA3_01_4008.d/+MS2(651.3363), 27.0eV, 49.1min #13776	ZW_Neuroblastom_E22965-08_3_RA3_01_4008.d	SwissProt-human-oReAlk2019_Mascot_2019-10-14 16:08:34	Protein Search
488.728	1.12408	976.449	976.448	33.4 (M.expect:0.0,M.score:33.4)	19 - 28	K.AGFAGDDAPR.A	7150162	ACTB_HUMAN	Actin, cytoplasmic 1 OS=Homo sapiens OX=9606 GN=ACTB PE=1 SV=1	275		TRUE	81	975.442	488.728	975.441	2	0.000549369	0.00109874	1.12524	3.8442	0.00179098	15.334	0.0120615	19.8952	2	1		1	69.0897	0				CID	/Neuroblastom-Imaging/Imaging-Sample1/ZW_Neuroblastom_E22965-08_3_RA3_01_4008.d/+MS2(488.7283), 26.5eV, 19.9min #4120	ZW_Neuroblastom_E22965-08_3_RA3_01_4008.d	SwissProt-human-oReAlk2019_Mascot_2019-10-14 16:08:34	Protein Search
488.729	1.67653	976.45	976.448	45.6 (M.expect:0.0,M.score:45.6)	19 - 28	K.AGFAGDDAPR.A	1072352	ACTB_HUMAN	Actin, cytoplasmic 1 OS=Homo sapiens OX=9606 GN=ACTB PE=1 SV=1	277		TRUE	983	975.443	488.728	975.441	2	0.000819369	0.00163874	1.67826	7.40907	0.00370932	21.4781	0.00789096	19.844	2	1		1	61.1271	0				CID	/Neuroblastom-Imaging/Imaging-Sample1/ZW_Neuroblastom_E22965-08_3_RA3_01_4008.d/+MS2(488.7286), 26.5eV, 19.8min #4097	ZW_Neuroblastom_E22965-08_3_RA3_01_4008.d	SwissProt-human-oReAlk2019_Mascot_2019-10-14 16:08:34	Protein Search
499.747	0.313907	998.487	998.486	19.5 (M.expect:0.0,M.score:19.5)	184 - 191	R.DLTDYLMK.I	62342	ACTB_HUMAN	Actin, cytoplasmic 1 OS=Homo sapiens OX=9606 GN=ACTB PE=1 SV=1	330		TRUE	10880	997.479	499.747	997.479	2	0.000156874	0.000313748	0.314224	7.85049	0.00302124	11.0415	0.00577801	51.178	2	1		1	18.0924	0				CID	/Neuroblastom-Imaging/Imaging-Sample1/ZW_Neuroblastom_E22965-08_3_RA3_01_4008.d/+MS2(499.7470), 27.0eV, 51.2min #14332	ZW_Neuroblastom_E22965-08_3_RA3_01_4008.d	SwissProt-human-oReAlk2019_Mascot_2019-10-14 16:08:34	Protein Search
499.748	1.8947	998.488	998.486	20.0 (M.expect:0.0,M.score:20.0)	184 - 191	R.DLTDYLMK.I	8646	ACTB_HUMAN	Actin, cytoplasmic 1 OS=Homo sapiens OX=9606 GN=ACTB PE=1 SV=1	333		TRUE	11963	997.481	499.747	997.479	2	0.000946874	0.00189375	1.89662	3.62405	0.00185841	4.25654	0.00259023	51.1432	2	1		1	18.842	0				CID	/Neuroblastom-Imaging/Imaging-Sample1/ZW_Neuroblastom_E22965-08_3_RA3_01_4008.d/+MS2(499.7477), 27.0eV, 51.2min #14328	ZW_Neuroblastom_E22965-08_3_RA3_01_4008.d	SwissProt-human-oReAlk2019_Mascot_2019-10-14 16:08:34	Protein Search
507.745	0.983514	1014.48	1014.48	16.5 (M.expect:0.0,M.score:16.5)	184 - 191	R.DLTDYLMK.I	125760	ACTB_HUMAN	Actin, cytoplasmic 1 OS=Homo sapiens OX=9606 GN=ACTB PE=1 SV=1	360		TRUE	10123	1013.47	507.744	1013.47	2	0.000499374	0.000998748	0.984491	7.19695	0.00448931	9.36339	0.0076061	42.9075	1	1		1	13.3985	0	Oxidation: 7			CID	/Neuroblastom-Imaging/Imaging-Sample1/ZW_Neuroblastom_E22965-08_3_RA3_01_4008.d/+MS2(507.7447), 27.5eV, 42.9min #12061	ZW_Neuroblastom_E22965-08_3_RA3_01_4008.d	SwissProt-human-oReAlk2019_Mascot_2019-10-14 16:08:34	Protein Search
566.768	1.42429	1132.53	1132.53	32.0 (M.expect:0.0,M.score:32.0)	197 - 206	R.GYSFTTTAER.E	826354	ACTB_HUMAN	Actin, cytoplasmic 1 OS=Homo sapiens OX=9606 GN=ACTB PE=1 SV=1	654		TRUE	1082	1131.52	566.767	1131.52	2	0.000807243	0.00161449	1.42556	2.61485	0.00111147	3.3803	0.00117423	25.046	1	1		1	41.0615	0				CID	/Neuroblastom-Imaging/Imaging-Sample1/ZW_Neuroblastom_E22965-08_3_RA3_01_4008.d/+MS2(566.7679), 31.0eV, 25.0min #6061	ZW_Neuroblastom_E22965-08_3_RA3_01_4008.d	SwissProt-human-oReAlk2019_Mascot_2019-10-14 16:08:34	Protein Search
581.313	0.13499	1161.62	1161.62	35.0 (M.expect:0.0,M.score:35.0)	316 - 326	K.EITALAPSTMK.I	604444	ACTB_HUMAN	Actin, cytoplasmic 1 OS=Homo sapiens OX=9606 GN=ACTB PE=1 SV=1	736		TRUE	1222	1160.61	581.313	1160.61	2	7.84714e-05	0.000156943	0.135107	2.96286	0.00142065	7.43671	0.00433799	33.6519	2	1		1	38.1746	0				CID	/Neuroblastom-Imaging/Imaging-Sample1/ZW_Neuroblastom_E22965-08_3_RA3_01_4008.d/+MS2(581.3129), 31.9eV, 33.7min #9093	ZW_Neuroblastom_E22965-08_3_RA3_01_4008.d	SwissProt-human-oReAlk2019_Mascot_2019-10-14 16:08:34	Protein Search
581.313	0.444634	1161.62	1161.62	34.8 (M.expect:0.0,M.score:34.8)	316 - 326	K.EITALAPSTMK.I	1941540	ACTB_HUMAN	Actin, cytoplasmic 1 OS=Homo sapiens OX=9606 GN=ACTB PE=1 SV=1	738		TRUE	242	1160.61	581.313	1160.61	2	0.000258471	0.000516943	0.445019	3.59905	0.00316417	7.89842	0.00523312	33.7018	2	1		1	44.2529	0				CID	/Neuroblastom-Imaging/Imaging-Sample1/ZW_Neuroblastom_E22965-08_3_RA3_01_4008.d/+MS2(581.3131), 31.9eV, 33.7min #9110	ZW_Neuroblastom_E22965-08_3_RA3_01_4008.d	SwissProt-human-oReAlk2019_Mascot_2019-10-14 16:08:34	Protein Search
586.29	1.53874	1171.57	1171.57	51.1 (M.expect:0.0,M.score:51.1)	40 - 50	R.HQGVMVGMGQK.D	212130	ACTB_HUMAN	Actin, cytoplasmic 1 OS=Homo sapiens OX=9606 GN=ACTB PE=1 SV=1	770		TRUE	5691	1170.57	586.289	1170.56	2	0.000902145	0.00180429	1.54006	5.83405	0.00401295	8.42109	0.00626523	18.8641	1	1		1	25.7998	0				CID	/Neuroblastom-Imaging/Imaging-Sample1/ZW_Neuroblastom_E22965-08_3_RA3_01_4008.d/+MS2(586.2901), 32.2eV, 18.9min #3770	ZW_Neuroblastom_E22965-08_3_RA3_01_4008.d	SwissProt-human-oReAlk2019_Mascot_2019-10-14 16:08:34	Protein Search
589.309	-2.83218	1177.61	1177.61	14.2 (M.expect:0.0,M.score:14.2)	316 - 326	K.EITALAPSTMK.I	54814	ACTB_HUMAN	Actin, cytoplasmic 1 OS=Homo sapiens OX=9606 GN=ACTB PE=1 SV=1	792		TRUE	1526	1176.6	589.31	1176.61	2	-0.00166903	-0.00333806	-2.8346	6.30354	0.00376642	17.9059	0.0122828	31.0043	3	1		1	8.26492	0	Oxidation: 10			CID	/Neuroblastom-Imaging/Imaging-Sample1/ZW_Neuroblastom_E22965-08_3_RA3_01_4008.d/+MS2(589.3086), 26.8eV, 31.0min #8187	ZW_Neuroblastom_E22965-08_3_RA3_01_4008.d	SwissProt-human-oReAlk2019_Mascot_2019-10-14 16:08:34	Protein Search
589.311	0.731314	1177.61	1177.61	32.6 (M.expect:0.0,M.score:32.6)	316 - 326	K.EITALAPSTMK.I	232154	ACTB_HUMAN	Actin, cytoplasmic 1 OS=Homo sapiens OX=9606 GN=ACTB PE=1 SV=1	793		TRUE	2857	1176.61	589.31	1176.61	2	0.000430971	0.000861943	0.73194	4.69484	0.00257851	5.47442	0.00366238	27.2989	3	1		1	22.5715	0	Oxidation: 10			CID	/Neuroblastom-Imaging/Imaging-Sample1/ZW_Neuroblastom_E22965-08_3_RA3_01_4008.d/+MS2(589.3107), 32.4eV, 27.3min #6896	ZW_Neuroblastom_E22965-08_3_RA3_01_4008.d	SwissProt-human-oReAlk2019_Mascot_2019-10-14 16:08:34	Protein Search
589.311	1.13857	1177.61	1177.61	50.3 (M.expect:0.0,M.score:50.3)	316 - 326	K.EITALAPSTMK.I	1137390	ACTB_HUMAN	Actin, cytoplasmic 1 OS=Homo sapiens OX=9606 GN=ACTB PE=1 SV=1	796		TRUE	525	1176.61	589.31	1176.61	2	0.000670971	0.00134194	1.13954	2.43008	0.00115202	2.86165	0.00137699	27.3526	3	1		1	30.8709	0	Oxidation: 10			CID	/Neuroblastom-Imaging/Imaging-Sample1/ZW_Neuroblastom_E22965-08_3_RA3_01_4008.d/+MS2(589.3110), 32.4eV, 27.4min #6914	ZW_Neuroblastom_E22965-08_3_RA3_01_4008.d	SwissProt-human-oReAlk2019_Mascot_2019-10-14 16:08:34	Protein Search
599.766	1.43884	1198.52	1198.52	42.5 (M.expect:0.0,M.score:42.5)	51 - 61	K.DSYVGDEAQSK.R	1164654	ACTB_HUMAN	Actin, cytoplasmic 1 OS=Homo sapiens OX=9606 GN=ACTB PE=1 SV=1	842		TRUE	664	1197.52	599.765	1197.51	2	0.000862967	0.00172593	1.44005	4.70288	0.00221896	6.89484	0.00345673	15.6072	4	1		1	43.8199	0				CID	/Neuroblastom-Imaging/Imaging-Sample1/ZW_Neuroblastom_E22965-08_3_RA3_01_4008.d/+MS2(599.7656), 33.0eV, 15.6min #2766	ZW_Neuroblastom_E22965-08_3_RA3_01_4008.d	SwissProt-human-oReAlk2019_Mascot_2019-10-14 16:08:34	Protein Search
599.766	1.53888	1198.52	1198.52	37.2 (M.expect:0.0,M.score:37.2)	51 - 61	K.DSYVGDEAQSK.R	297864	ACTB_HUMAN	Actin, cytoplasmic 1 OS=Homo sapiens OX=9606 GN=ACTB PE=1 SV=1	845		TRUE	3697	1197.52	599.765	1197.51	2	0.000922967	0.00184593	1.54017	3.65605	0.0014975	15.2488	0.0125118	18.1891	4	1		1	31.815	0				CID	/Neuroblastom-Imaging/Imaging-Sample1/ZW_Neuroblastom_E22965-08_3_RA3_01_4008.d/+MS2(599.7657), 33.0eV, 18.2min #3548	ZW_Neuroblastom_E22965-08_3_RA3_01_4008.d	SwissProt-human-oReAlk2019_Mascot_2019-10-14 16:08:34	Protein Search
599.766	2.10577	1198.52	1198.52	33.5 (M.expect:0.0,M.score:33.5)	51 - 61	K.DSYVGDEAQSK.R	57428	ACTB_HUMAN	Actin, cytoplasmic 1 OS=Homo sapiens OX=9606 GN=ACTB PE=1 SV=1	846		TRUE	4154	1197.52	599.765	1197.51	2	0.00126297	0.00252593	2.10754	18.4077	0.0138226	31.797	0.0185901	18.0334	4	1		1	17.3065	0				CID	/Neuroblastom-Imaging/Imaging-Sample1/ZW_Neuroblastom_E22965-08_3_RA3_01_4008.d/+MS2(599.7660), 33.0eV, 18.0min #3502	ZW_Neuroblastom_E22965-08_3_RA3_01_4008.d	SwissProt-human-oReAlk2019_Mascot_2019-10-14 16:08:34	Protein Search
599.766	2.28917	1198.52	1198.52	35.5 (M.expect:0.0,M.score:35.5)	51 - 61	K.DSYVGDEAQSK.R	376850	ACTB_HUMAN	Actin, cytoplasmic 1 OS=Homo sapiens OX=9606 GN=ACTB PE=1 SV=1	849		TRUE	4402	1197.52	599.765	1197.51	2	0.00137297	0.00274593	2.29109	2.64578	0.00111802	2.96688	0.00152268	15.5587	4	1		1	36.9678	0				CID	/Neuroblastom-Imaging/Imaging-Sample1/ZW_Neuroblastom_E22965-08_3_RA3_01_4008.d/+MS2(599.7661), 33.0eV, 15.6min #2752	ZW_Neuroblastom_E22965-08_3_RA3_01_4008.d	SwissProt-human-oReAlk2019_Mascot_2019-10-14 16:08:34	Protein Search
400.24	1.02817	1198.71	1198.71	69.9 (M.expect:0.0,M.score:69.9)	29 - 39	R.AVFPSIVGRPR.H	12302432	ACTB_HUMAN	Actin, cytoplasmic 1 OS=Homo sapiens OX=9606 GN=ACTB PE=1 SV=1	861		TRUE	856	1197.7	400.24	1197.7	3	0.000411516	0.00123455	1.0299	5.32061	0.00209289	6.87833	0.00275441	31.8259	4	1		1	52.2947	0				CID	/Neuroblastom-Imaging/Imaging-Sample1/ZW_Neuroblastom_E22965-08_3_RA3_01_4008.d/+MS2(400.2404), 23.0eV, 31.8min #8461	ZW_Neuroblastom_E22965-08_3_RA3_01_4008.d	SwissProt-human-oReAlk2019_Mascot_2019-10-14 16:08:34	Protein Search
400.24	1.17808	1198.71	1198.71	22.8 (M.expect:0.0,M.score:22.8)	29 - 39	R.AVFPSIVGRPR.H	6610722	ACTB_HUMAN	Actin, cytoplasmic 1 OS=Homo sapiens OX=9606 GN=ACTB PE=1 SV=1	862		TRUE	8884	1197.7	400.24	1197.7	3	0.000471516	0.00141455	1.18006	5.01671	0.00264716	8.1541	0.00378781	31.7773	4	1		1	12.5493	0				CID	/Neuroblastom-Imaging/Imaging-Sample1/ZW_Neuroblastom_E22965-08_3_RA3_01_4008.d/+MS2(400.2405), 23.0eV, 31.8min #8449	ZW_Neuroblastom_E22965-08_3_RA3_01_4008.d	SwissProt-human-oReAlk2019_Mascot_2019-10-14 16:08:34	Protein Search
400.241	1.32799	1198.71	1198.71	68.0 (M.expect:0.0,M.score:68.0)	29 - 39	R.AVFPSIVGRPR.H	2450366	ACTB_HUMAN	Actin, cytoplasmic 1 OS=Homo sapiens OX=9606 GN=ACTB PE=1 SV=1	865		TRUE	8310	1197.7	400.24	1197.7	3	0.000531516	0.00159455	1.33022	5.82339	0.00158479	9.96112	0.00385072	31.7211	4	1		1	42.044	0				CID	/Neuroblastom-Imaging/Imaging-Sample1/ZW_Neuroblastom_E22965-08_3_RA3_01_4008.d/+MS2(400.2406), 23.0eV, 31.7min #8422	ZW_Neuroblastom_E22965-08_3_RA3_01_4008.d	SwissProt-human-oReAlk2019_Mascot_2019-10-14 16:08:34	Protein Search
599.857	0.417599	1198.71	1198.71	50.2 (M.expect:0.0,M.score:50.2)	29 - 39	R.AVFPSIVGRPR.H	781768	ACTB_HUMAN	Actin, cytoplasmic 1 OS=Homo sapiens OX=9606 GN=ACTB PE=1 SV=1	868		TRUE	1161	1197.7	599.856	1197.7	2	0.000250499	0.000500999	0.41795	5.0186	0.00200975	6.2196	0.00239596	31.8276	4	1		1	63.2411	0				CID	/Neuroblastom-Imaging/Imaging-Sample1/ZW_Neuroblastom_E22965-08_3_RA3_01_4008.d/+MS2(599.8566), 33.0eV, 31.8min #8464	ZW_Neuroblastom_E22965-08_3_RA3_01_4008.d	SwissProt-human-oReAlk2019_Mascot_2019-10-14 16:08:34	Protein Search
452.214	2.51242	1354.63	1354.62	43.5 (M.expect:0.0,M.score:43.5)	51 - 62	K.DSYVGDEAQSKR.G	818354	ACTB_HUMAN	Actin, cytoplasmic 1 OS=Homo sapiens OX=9606 GN=ACTB PE=1 SV=1	1444		TRUE	1113	1353.62	452.213	1353.62	3	0.00113615	0.00340845	2.51616	6.83855	0.0075531	16.84	0.0139224	14.8443	4	1		1	26.0967	1				CID	/Neuroblastom-Imaging/Imaging-Sample1/ZW_Neuroblastom_E22965-08_3_RA3_01_4008.d/+MS2(452.2138), 25.1eV, 14.9min #2533	ZW_Neuroblastom_E22965-08_3_RA3_01_4008.d	SwissProt-human-oReAlk2019_Mascot_2019-10-14 16:08:34	Protein Search
452.214	2.91046	1354.63	1354.62	35.0 (M.expect:0.0,M.score:35.0)	51 - 62	K.DSYVGDEAQSKR.G	852842	ACTB_HUMAN	Actin, cytoplasmic 1 OS=Homo sapiens OX=9606 GN=ACTB PE=1 SV=1	1445		TRUE	1349	1353.62	452.213	1353.62	3	0.00131615	0.00394845	2.91479	10.1333	0.00544405	25.1332	0.0119828	14.6754	4	1		1	30.8382	1				CID	/Neuroblastom-Imaging/Imaging-Sample1/ZW_Neuroblastom_E22965-08_3_RA3_01_4008.d/+MS2(452.2139), 24.0eV, 14.7min #2465	ZW_Neuroblastom_E22965-08_3_RA3_01_4008.d	SwissProt-human-oReAlk2019_Mascot_2019-10-14 16:08:34	Protein Search
452.214	3.44118	1354.63	1354.62	14.5 (M.expect:0.0,M.score:14.5)	51 - 62	K.DSYVGDEAQSKR.G	231996	ACTB_HUMAN	Actin, cytoplasmic 1 OS=Homo sapiens OX=9606 GN=ACTB PE=1 SV=1	1448		TRUE	1945	1353.62	452.213	1353.62	3	0.00155615	0.00466845	3.4463	8.46387	0.00362615	29.8433	0.0153992	14.5675	4	1		1	9.98681	1				CID	/Neuroblastom-Imaging/Imaging-Sample1/ZW_Neuroblastom_E22965-08_3_RA3_01_4008.d/+MS2(452.2142), 24.0eV, 14.6min #2406	ZW_Neuroblastom_E22965-08_3_RA3_01_4008.d	SwissProt-human-oReAlk2019_Mascot_2019-10-14 16:08:34	Protein Search
677.816	0.999465	1354.62	1354.62	27.3 (M.expect:0.0,M.score:27.3)	51 - 62	K.DSYVGDEAQSKR.G	120684	ACTB_HUMAN	Actin, cytoplasmic 1 OS=Homo sapiens OX=9606 GN=ACTB PE=1 SV=1	1450		TRUE	4644	1353.62	677.815	1353.62	2	0.000677453	0.00135491	1.00021	12.161	0.009233	74.6731	0.0156827	14.6253	4	1		1	37.5391	1				CID	/Neuroblastom-Imaging/Imaging-Sample1/ZW_Neuroblastom_E22965-08_3_RA3_01_4008.d/+MS2(677.8160), 33.0eV, 14.6min #2443	ZW_Neuroblastom_E22965-08_3_RA3_01_4008.d	SwissProt-human-oReAlk2019_Mascot_2019-10-14 16:08:34	Protein Search
506.241	2.96006	1516.71	1516.7	27.3 (M.expect:0.0,M.score:27.3)	360 - 372	K.QEYDESGPSIVHR.K	326290	ACTB_HUMAN	Actin, cytoplasmic 1 OS=Homo sapiens OX=9606 GN=ACTB PE=1 SV=1	1980		TRUE	2343	1515.7	506.239	1515.7	3	0.0014985	0.0044955	2.96399	6.61305	0.00456277	12.2398	0.00860989	22.6381	1	1		1	12.5272	0				CID	/Neuroblastom-Imaging/Imaging-Sample1/ZW_Neuroblastom_E22965-08_3_RA3_01_4008.d/+MS2(506.2406), 25.1eV, 22.6min #5167	ZW_Neuroblastom_E22965-08_3_RA3_01_4008.d	SwissProt-human-oReAlk2019_Mascot_2019-10-14 16:08:34	Protein Search
890.886	-4.48345	1780.76	1780.77	16.4 (M.expect:0.0,M.score:16.4)	2 - 18	M.DDDIAALVVDNGSGMCK.A	12966	ACTB_HUMAN	Actin, cytoplasmic 1 OS=Homo sapiens OX=9606 GN=ACTB PE=1 SV=1	2951		TRUE	14642	1779.76	890.89	1779.77	2	-0.00399425	-0.00798849	-4.48599	5.97583	0.00392531	9.4033	0.00484747	62.5367	3	1		1	22.3695	0	Acetyl: 1; Oxidation: 15			CID	/Neuroblastom-Imaging/Imaging-Sample1/ZW_Neuroblastom_E22965-08_3_RA3_01_4008.d/+MS2(890.8860), 49.5eV, 62.6min #17211	ZW_Neuroblastom_E22965-08_3_RA3_01_4008.d	SwissProt-human-oReAlk2019_Mascot_2019-10-14 16:08:34	Protein Search
890.888	-2.35074	1780.77	1780.77	20.7 (M.expect:0.0,M.score:20.7)	2 - 18	M.DDDIAALVVDNGSGMCK.A	12206	ACTB_HUMAN	Actin, cytoplasmic 1 OS=Homo sapiens OX=9606 GN=ACTB PE=1 SV=1	2952		TRUE	14620	1779.76	890.89	1779.77	2	-0.00209425	-0.00418849	-2.35207	6.19855	0.00313295	7.75865	0.00598085	62.4912	3	1		1	24.1697	0	Acetyl: 1; Oxidation: 15			CID	/Neuroblastom-Imaging/Imaging-Sample1/ZW_Neuroblastom_E22965-08_3_RA3_01_4008.d/+MS2(890.8879), 49.5eV, 62.5min #17201	ZW_Neuroblastom_E22965-08_3_RA3_01_4008.d	SwissProt-human-oReAlk2019_Mascot_2019-10-14 16:08:34	Protein Search
890.889	-1.27316	1780.77	1780.77	48.1 (M.expect:0.0,M.score:48.1)	2 - 18	M.DDDIAALVVDNGSGMCK.A	12446	ACTB_HUMAN	Actin, cytoplasmic 1 OS=Homo sapiens OX=9606 GN=ACTB PE=1 SV=1	2953		TRUE	14590	1779.76	890.89	1779.77	2	-0.00113425	-0.00226849	-1.27388	13.0364	0.0138658	45.7996	0.0173453	62.4706	3	1		1	29.444	0	Acetyl: 1; Oxidation: 15			CID	/Neuroblastom-Imaging/Imaging-Sample1/ZW_Neuroblastom_E22965-08_3_RA3_01_4008.d/+MS2(890.8889), 49.5eV, 62.5min #17195	ZW_Neuroblastom_E22965-08_3_RA3_01_4008.d	SwissProt-human-oReAlk2019_Mascot_2019-10-14 16:08:34	Protein Search
597.636	0.216502	1790.89	1790.89	32.8 (M.expect:0.0,M.score:32.8)	239 - 254	K.SYELPDGQVITIGNER.F	38100	ACTB_HUMAN	Actin, cytoplasmic 1 OS=Homo sapiens OX=9606 GN=ACTB PE=1 SV=1	2974		TRUE	8037	1789.89	597.635	1789.88	3	0.000129389	0.000388167	0.216745	2.44006	0.00163763	2.86533	0.00226558	48.4252	6	1		1	24.682	0				CID	/Neuroblastom-Imaging/Imaging-Sample1/ZW_Neuroblastom_E22965-08_3_RA3_01_4008.d/+MS2(597.6356), 27.0eV, 48.4min #13594	ZW_Neuroblastom_E22965-08_3_RA3_01_4008.d	SwissProt-human-oReAlk2019_Mascot_2019-10-14 16:08:34	Protein Search
597.636	0.969468	1790.89	1790.89	42.1 (M.expect:0.0,M.score:42.1)	239 - 254	K.SYELPDGQVITIGNER.F	168924	ACTB_HUMAN	Actin, cytoplasmic 1 OS=Homo sapiens OX=9606 GN=ACTB PE=1 SV=1	2975		TRUE	7890	1789.89	597.635	1789.88	3	0.000579389	0.00173817	0.970559	4.03815	0.003123	4.64974	0.00378987	49.5449	6	1		1	27.9554	0				CID	/Neuroblastom-Imaging/Imaging-Sample1/ZW_Neuroblastom_E22965-08_3_RA3_01_4008.d/+MS2(597.6361), 27.0eV, 49.5min #13894	ZW_Neuroblastom_E22965-08_3_RA3_01_4008.d	SwissProt-human-oReAlk2019_Mascot_2019-10-14 16:08:34	Protein Search
895.949	-0.443876	1790.89	1790.89	88.3 (M.expect:0.0,M.score:88.3)	239 - 254	K.SYELPDGQVITIGNER.F	862606	ACTB_HUMAN	Actin, cytoplasmic 1 OS=Homo sapiens OX=9606 GN=ACTB PE=1 SV=1	2979		TRUE	421	1789.88	895.95	1789.88	2	-0.00039769	-0.000795381	-0.444126	2.36885	0.00150925	9.99108	0.011759	48.3815	6	1		1	51.8662	0				CID	/Neuroblastom-Imaging/Imaging-Sample1/ZW_Neuroblastom_E22965-08_3_RA3_01_4008.d/+MS2(895.9492), 49.9eV, 48.4min #13582	ZW_Neuroblastom_E22965-08_3_RA3_01_4008.d	SwissProt-human-oReAlk2019_Mascot_2019-10-14 16:08:34	Protein Search
895.949	-0.421553	1790.89	1790.89	97.7 (M.expect:0.0,M.score:97.7)	239 - 254	K.SYELPDGQVITIGNER.F	2551632	ACTB_HUMAN	Actin, cytoplasmic 1 OS=Homo sapiens OX=9606 GN=ACTB PE=1 SV=1	2985		TRUE	134	1789.88	895.95	1789.88	2	-0.00037769	-0.000755381	-0.42179	3.02848	0.00316768	8.01575	0.00600088	49.5461	6	1		1	55.6633	0				CID	/Neuroblastom-Imaging/Imaging-Sample1/ZW_Neuroblastom_E22965-08_3_RA3_01_4008.d/+MS2(895.9492), 49.9eV, 49.5min #13895	ZW_Neuroblastom_E22965-08_3_RA3_01_4008.d	SwissProt-human-oReAlk2019_Mascot_2019-10-14 16:08:34	Protein Search
895.949	-0.421553	1790.89	1790.89	71.6 (M.expect:0.0,M.score:71.6)	239 - 254	K.SYELPDGQVITIGNER.F	2551632	ACTB_HUMAN	Actin, cytoplasmic 1 OS=Homo sapiens OX=9606 GN=ACTB PE=1 SV=1	2986		TRUE	209	1789.88	895.95	1789.88	2	-0.00037769	-0.000755381	-0.42179	2.10751	0.00158284	6.4959	0.00672403	49.5443	6	1		1	58.8732	0				CID	/Neuroblastom-Imaging/Imaging-Sample1/ZW_Neuroblastom_E22965-08_3_RA3_01_4008.d/+MS2(895.9492), 49.8eV, 49.5min #13893	ZW_Neuroblastom_E22965-08_3_RA3_01_4008.d	SwissProt-human-oReAlk2019_Mascot_2019-10-14 16:08:34	Protein Search
895.95	0.0807073	1790.89	1790.89	91.5 (M.expect:0.0,M.score:91.5)	239 - 254	K.SYELPDGQVITIGNER.F	523584	ACTB_HUMAN	Actin, cytoplasmic 1 OS=Homo sapiens OX=9606 GN=ACTB PE=1 SV=1	2987		TRUE	2440	1789.88	895.95	1789.88	2	7.23097e-05	0.000144619	0.0807527	2.70546	0.00179981	5.77819	0.00238465	48.3183	6	1		1	56.5299	0				CID	/Neuroblastom-Imaging/Imaging-Sample1/ZW_Neuroblastom_E22965-08_3_RA3_01_4008.d/+MS2(895.9497), 49.8eV, 48.3min #13562	ZW_Neuroblastom_E22965-08_3_RA3_01_4008.d	SwissProt-human-oReAlk2019_Mascot_2019-10-14 16:08:34	Protein Search
652.026	0.0782739	1954.06	1954.06	24.8 (M.expect:0.0,M.score:24.8)	96 - 113	R.VAPEEHPVLLTEAPLNPK.A	9367210	ACTB_HUMAN	Actin, cytoplasmic 1 OS=Homo sapiens OX=9606 GN=ACTB PE=1 SV=1	3353		TRUE	442	1953.06	652.026	1953.06	3	5.10366e-05	0.00015311	0.0783546	4.67594	0.00395377	7.29341	0.00622998	39.9843	8	1		1	14.6744	0				CID	/Neuroblastom-Imaging/Imaging-Sample1/ZW_Neuroblastom_E22965-08_3_RA3_01_4008.d/+MS2(652.0264), 33.0eV, 40.0min #11184	ZW_Neuroblastom_E22965-08_3_RA3_01_4008.d	SwissProt-human-oReAlk2019_Mascot_2019-10-14 16:08:34	Protein Search
652.027	0.323663	1954.07	1954.06	42.9 (M.expect:0.0,M.score:42.9)	96 - 113	R.VAPEEHPVLLTEAPLNPK.A	2561934	ACTB_HUMAN	Actin, cytoplasmic 1 OS=Homo sapiens OX=9606 GN=ACTB PE=1 SV=1	3354		TRUE	67	1953.06	652.026	1953.06	3	0.000211037	0.00063311	0.323996	2.4247	0.00186069	6.28773	0.00731444	39.8798	8	1		1	51.8833	0				CID	/Neuroblastom-Imaging/Imaging-Sample1/ZW_Neuroblastom_E22965-08_3_RA3_01_4008.d/+MS2(652.0265), 27.0eV, 39.9min #11150	ZW_Neuroblastom_E22965-08_3_RA3_01_4008.d	SwissProt-human-oReAlk2019_Mascot_2019-10-14 16:08:34	Protein Search
652.027	0.338999	1954.07	1954.06	30.8 (M.expect:0.0,M.score:30.8)	96 - 113	R.VAPEEHPVLLTEAPLNPK.A	8810382	ACTB_HUMAN	Actin, cytoplasmic 1 OS=Homo sapiens OX=9606 GN=ACTB PE=1 SV=1	3355		TRUE	14	1953.06	652.026	1953.06	3	0.000221037	0.00066311	0.339349	1.7698	0.00176256	2.87659	0.00265583	39.9331	8	1		1	53.9137	0				CID	/Neuroblastom-Imaging/Imaging-Sample1/ZW_Neuroblastom_E22965-08_3_RA3_01_4008.d/+MS2(652.0265), 27.0eV, 39.9min #11167	ZW_Neuroblastom_E22965-08_3_RA3_01_4008.d	SwissProt-human-oReAlk2019_Mascot_2019-10-14 16:08:34	Protein Search
652.027	0.338999	1954.07	1954.06	43.5 (M.expect:0.0,M.score:43.5)	96 - 113	R.VAPEEHPVLLTEAPLNPK.A	8810382	ACTB_HUMAN	Actin, cytoplasmic 1 OS=Homo sapiens OX=9606 GN=ACTB PE=1 SV=1	3356		TRUE	3	1953.06	652.026	1953.06	3	0.000221037	0.00066311	0.339349	2.35773	0.00206815	4.46697	0.00570156	39.9427	8	1		1	54.6735	0				CID	/Neuroblastom-Imaging/Imaging-Sample1/ZW_Neuroblastom_E22965-08_3_RA3_01_4008.d/+MS2(652.0265), 27.0eV, 40.0min #11175	ZW_Neuroblastom_E22965-08_3_RA3_01_4008.d	SwissProt-human-oReAlk2019_Mascot_2019-10-14 16:08:34	Protein Search
652.027	0.737756	1954.07	1954.06	45.5 (M.expect:0.0,M.score:45.5)	96 - 113	R.VAPEEHPVLLTEAPLNPK.A	2718544	ACTB_HUMAN	Actin, cytoplasmic 1 OS=Homo sapiens OX=9606 GN=ACTB PE=1 SV=1	3357		TRUE	43	1953.06	652.026	1953.06	3	0.000481037	0.00144311	0.738517	2.40451	0.00235978	22.1822	0.0106461	40.1589	8	1		1	52.4777	0				CID	/Neuroblastom-Imaging/Imaging-Sample1/ZW_Neuroblastom_E22965-08_3_RA3_01_4008.d/+MS2(652.0268), 27.0eV, 40.2min #11245	ZW_Neuroblastom_E22965-08_3_RA3_01_4008.d	SwissProt-human-oReAlk2019_Mascot_2019-10-14 16:08:34	Protein Search
652.027	0.737756	1954.07	1954.06	37.7 (M.expect:0.0,M.score:37.7)	96 - 113	R.VAPEEHPVLLTEAPLNPK.A	2718544	ACTB_HUMAN	Actin, cytoplasmic 1 OS=Homo sapiens OX=9606 GN=ACTB PE=1 SV=1	3358		TRUE	317	1953.06	652.026	1953.06	3	0.000481037	0.00144311	0.738517	2.95695	0.00266485	4.09437	0.00446789	40.1485	8	1		1	19.8291	0				CID	/Neuroblastom-Imaging/Imaging-Sample1/ZW_Neuroblastom_E22965-08_3_RA3_01_4008.d/+MS2(652.0268), 33.0eV, 40.2min #11239	ZW_Neuroblastom_E22965-08_3_RA3_01_4008.d	SwissProt-human-oReAlk2019_Mascot_2019-10-14 16:08:34	Protein Search
977.536	0.357819	1954.07	1954.06	35.1 (M.expect:0.0,M.score:35.1)	96 - 113	R.VAPEEHPVLLTEAPLNPK.A	81356	ACTB_HUMAN	Actin, cytoplasmic 1 OS=Homo sapiens OX=9606 GN=ACTB PE=1 SV=1	3359		TRUE	8108	1953.06	977.536	1953.06	2	0.000349781	0.000699562	0.358003	5.23608	0.00652614	47.2665	0.0107386	39.935	8	1		1	24.2585	0				CID	/Neuroblastom-Imaging/Imaging-Sample1/ZW_Neuroblastom_E22965-08_3_RA3_01_4008.d/+MS2(977.5362), 53.9eV, 39.9min #11170	ZW_Neuroblastom_E22965-08_3_RA3_01_4008.d	SwissProt-human-oReAlk2019_Mascot_2019-10-14 16:08:34	Protein Search
977.536	0.654483	1954.07	1954.06	33.4 (M.expect:0.0,M.score:33.4)	96 - 113	R.VAPEEHPVLLTEAPLNPK.A	16814	ACTB_HUMAN	Actin, cytoplasmic 1 OS=Homo sapiens OX=9606 GN=ACTB PE=1 SV=1	3360		TRUE	3698	1953.06	977.536	1953.06	2	0.000639781	0.00127956	0.65482	7.26466	0.00742303	9.94283	0.00942293	39.9015	8	1		1	28.8928	0				CID	/Neuroblastom-Imaging/Imaging-Sample1/ZW_Neuroblastom_E22965-08_3_RA3_01_4008.d/+MS2(977.5365), 53.9eV, 39.9min #11165	ZW_Neuroblastom_E22965-08_3_RA3_01_4008.d	SwissProt-human-oReAlk2019_Mascot_2019-10-14 16:08:34	Protein Search
698.692	-0.256087	2094.06	2094.06	23.1 (M.expect:0.0,M.score:23.1)	239 - 256	K.SYELPDGQVITIGNERFR.C	19550	ACTB_HUMAN	Actin, cytoplasmic 1 OS=Homo sapiens OX=9606 GN=ACTB PE=1 SV=1	3581		TRUE	8510	2093.05	698.692	2093.05	3	-0.000178926	-0.000536777	-0.256333	7.69124	0.00459537	19.9487	0.0117941	47.2037	1	1		1	33.5387	1				CID	/Neuroblastom-Imaging/Imaging-Sample1/ZW_Neuroblastom_E22965-08_3_RA3_01_4008.d/+MS2(698.6918), 27.0eV, 47.2min #13269	ZW_Neuroblastom_E22965-08_3_RA3_01_4008.d	SwissProt-human-oReAlk2019_Mascot_2019-10-14 16:08:34	Protein Search
1108.04	-2.67866	2215.06	2215.07	43.5 (M.expect:0.0,M.score:43.5)	292 - 312	K.DLYANTVLSGGTTMYPGIADR.M	9430	ACTB_HUMAN	Actin, cytoplasmic 1 OS=Homo sapiens OX=9606 GN=ACTB PE=1 SV=1	3692		TRUE	14967	2214.06	1108.04	2214.06	2	-0.00296805	-0.0059361	-2.67988	10.1813	0.0121834	21.7209	0.0156153	59.4572	2	1		1	17.3609	0				CID	/Neuroblastom-Imaging/Imaging-Sample1/ZW_Neuroblastom_E22965-08_3_RA3_01_4008.d/+MS2(1108.0356), 65.0eV, 59.5min #16502	ZW_Neuroblastom_E22965-08_3_RA3_01_4008.d	SwissProt-human-oReAlk2019_Mascot_2019-10-14 16:08:34	Protein Search
1108.04	-1.90251	2215.07	2215.07	36.8 (M.expect:0.0,M.score:36.8)	292 - 312	K.DLYANTVLSGGTTMYPGIADR.M	22134	ACTB_HUMAN	Actin, cytoplasmic 1 OS=Homo sapiens OX=9606 GN=ACTB PE=1 SV=1	3693		TRUE	13067	2214.06	1108.04	2214.06	2	-0.00210805	-0.0042161	-1.90338	7.10069	0.00757341	18.4446	0.0116549	59.5165	2	1		1	17.8659	0				CID	/Neuroblastom-Imaging/Imaging-Sample1/ZW_Neuroblastom_E22965-08_3_RA3_01_4008.d/+MS2(1108.0365), 65.0eV, 59.5min #16521	ZW_Neuroblastom_E22965-08_3_RA3_01_4008.d	SwissProt-human-oReAlk2019_Mascot_2019-10-14 16:08:34	Protein Search
744.36	-0.186985	2231.06	2231.06	37.4 (M.expect:0.0,M.score:37.4)	292 - 312	K.DLYANTVLSGGTTMYPGIADR.M	74268	ACTB_HUMAN	Actin, cytoplasmic 1 OS=Homo sapiens OX=9606 GN=ACTB PE=1 SV=1	3710		TRUE	13002	2230.06	744.36	2230.06	3	-0.000139184	-0.000417553	-0.187154	10.4926	0.0100062	12.6185	0.0119652	54.7122	6	1		1	22.5249	0	Oxidation: 14			CID	/Neuroblastom-Imaging/Imaging-Sample1/ZW_Neuroblastom_E22965-08_3_RA3_01_4008.d/+MS2(744.3597), 32.8eV, 54.7min #15294	ZW_Neuroblastom_E22965-08_3_RA3_01_4008.d	SwissProt-human-oReAlk2019_Mascot_2019-10-14 16:08:34	Protein Search
744.36	0.122005	2231.07	2231.06	51.3 (M.expect:0.0,M.score:51.3)	292 - 312	K.DLYANTVLSGGTTMYPGIADR.M	68782	ACTB_HUMAN	Actin, cytoplasmic 1 OS=Homo sapiens OX=9606 GN=ACTB PE=1 SV=1	3711		TRUE	9473	2230.06	744.36	2230.06	3	9.08157e-05	0.000272447	0.122115	7.00181	0.00674873	9.95318	0.00963664	54.617	6	1		1	32.1097	0	Oxidation: 14			CID	/Neuroblastom-Imaging/Imaging-Sample1/ZW_Neuroblastom_E22965-08_3_RA3_01_4008.d/+MS2(744.3599), 32.8eV, 54.6min #15272	ZW_Neuroblastom_E22965-08_3_RA3_01_4008.d	SwissProt-human-oReAlk2019_Mascot_2019-10-14 16:08:34	Protein Search
1116.03	-2.89915	2231.06	2231.06	25.0 (M.expect:0.0,M.score:25.0)	292 - 312	K.DLYANTVLSGGTTMYPGIADR.M	18640	ACTB_HUMAN	Actin, cytoplasmic 1 OS=Homo sapiens OX=9606 GN=ACTB PE=1 SV=1	3712		TRUE	12877	2230.05	1116.04	2230.06	2	-0.00323555	-0.0064711	-2.90046	4.83044	0.00421662	6.41924	0.00613382	54.5473	6	1		1	14.8755	0	Oxidation: 14			CID	/Neuroblastom-Imaging/Imaging-Sample1/ZW_Neuroblastom_E22965-08_3_RA3_01_4008.d/+MS2(1116.0328), 65.0eV, 54.5min #15247	ZW_Neuroblastom_E22965-08_3_RA3_01_4008.d	SwissProt-human-oReAlk2019_Mascot_2019-10-14 16:08:34	Protein Search
1116.03	-1.4655	2231.06	2231.06	45.7 (M.expect:0.0,M.score:45.7)	292 - 312	K.DLYANTVLSGGTTMYPGIADR.M	167082	ACTB_HUMAN	Actin, cytoplasmic 1 OS=Homo sapiens OX=9606 GN=ACTB PE=1 SV=1	3713		TRUE	10093	2230.05	1116.04	2230.06	2	-0.00163555	-0.0032711	-1.46616	6.53506	0.00553175	20.2666	0.0118713	54.6638	6	1		1	24.0416	0	Oxidation: 14			CID	/Neuroblastom-Imaging/Imaging-Sample1/ZW_Neuroblastom_E22965-08_3_RA3_01_4008.d/+MS2(1116.0344), 55.0eV, 54.7min #15282	ZW_Neuroblastom_E22965-08_3_RA3_01_4008.d	SwissProt-human-oReAlk2019_Mascot_2019-10-14 16:08:34	Protein Search
1116.03	-1.07125	2231.06	2231.06	28.2 (M.expect:0.0,M.score:28.2)	292 - 312	K.DLYANTVLSGGTTMYPGIADR.M	100752	ACTB_HUMAN	Actin, cytoplasmic 1 OS=Homo sapiens OX=9606 GN=ACTB PE=1 SV=1	3714		TRUE	13889	2230.06	1116.04	2230.06	2	-0.00119555	-0.0023911	-1.07173	12.5834	0.00926642	20.6368	0.0125679	54.7107	6	1		1	10.4554	0	Oxidation: 14			CID	/Neuroblastom-Imaging/Imaging-Sample1/ZW_Neuroblastom_E22965-08_3_RA3_01_4008.d/+MS2(1116.0349), 65.0eV, 54.7min #15292	ZW_Neuroblastom_E22965-08_3_RA3_01_4008.d	SwissProt-human-oReAlk2019_Mascot_2019-10-14 16:08:34	Protein Search
1116.04	-0.82932	2231.06	2231.06	34.8 (M.expect:0.0,M.score:34.8)	292 - 312	K.DLYANTVLSGGTTMYPGIADR.M	91862	ACTB_HUMAN	Actin, cytoplasmic 1 OS=Homo sapiens OX=9606 GN=ACTB PE=1 SV=1	3715		TRUE	12077	2230.06	1116.04	2230.06	2	-0.00092555	-0.0018511	-0.829695	8.52091	0.00819224	21.2641	0.0122107	54.5973	6	1		1	14.2433	0	Oxidation: 14			CID	/Neuroblastom-Imaging/Imaging-Sample1/ZW_Neuroblastom_E22965-08_3_RA3_01_4008.d/+MS2(1116.0352), 65.0eV, 54.6min #15262	ZW_Neuroblastom_E22965-08_3_RA3_01_4008.d	SwissProt-human-oReAlk2019_Mascot_2019-10-14 16:08:34	Protein Search
787.059	1.16867	2359.16	2359.16	42.8 (M.expect:0.0,M.score:42.8)	291 - 312	R.KDLYANTVLSGGTTMYPGIADR.M	63716	ACTB_HUMAN	Actin, cytoplasmic 1 OS=Homo sapiens OX=9606 GN=ACTB PE=1 SV=1	3762		TRUE	10054	2358.16	787.058	2358.15	3	0.00091981	0.00275943	1.16966	10.1661	0.00811457	38.6585	0.0143462	42.342	1	1		1	20.9497	1	Oxidation: 15			CID	/Neuroblastom-Imaging/Imaging-Sample1/ZW_Neuroblastom_E22965-08_3_RA3_01_4008.d/+MS2(787.0591), 38.4eV, 42.3min #11891	ZW_Neuroblastom_E22965-08_3_RA3_01_4008.d	SwissProt-human-oReAlk2019_Mascot_2019-10-14 16:08:34	Protein Search
638.347	-2.85303	1275.69	1275.69	21.3 (M.expect:0.0,M.score:21.3)	327 - 339	K.NSVSQISVLSGGK.A	89132	ARC1B_HUMAN	Actin-related protein 2/3 complex subunit 1B OS=Homo sapiens OX=9606 GN=ARPC1B PE=1 SV=3	1157		TRUE	6674	1274.68	638.349	1274.68	2	-0.00182122	-0.00364245	-2.85528	5.85417	0.00267673	8.66647	0.00461812	32.3017	1	1		1	19.0049	0				CID	/Neuroblastom-Imaging/Imaging-Sample1/ZW_Neuroblastom_E22965-08_3_RA3_01_4008.d/+MS2(638.3470), 33.0eV, 32.3min #8632	ZW_Neuroblastom_E22965-08_3_RA3_01_4008.d	SwissProt-human-oReAlk2019_Mascot_2019-10-14 16:08:34	Protein Search
605.87	-0.793848	1210.73	1210.73	38.0 (M.expect:0.0,M.score:38.0)	15 - 25	K.LIGNMALLPIR.S	15112	ARPC3_HUMAN	Actin-related protein 2/3 complex subunit 3 OS=Homo sapiens OX=9606 GN=ARPC3 PE=1 SV=3	902		TRUE	12091	1209.73	605.871	1209.73	2	-0.000480969	-0.000961938	-0.794508	5.28276	0.00251436	5.98937	0.00355757	55.0213	1	1		1	22.7248	0				CID	/Neuroblastom-Imaging/Imaging-Sample1/ZW_Neuroblastom_E22965-08_3_RA3_01_4008.d/+MS2(605.8702), 33.0eV, 55.0min #15369	ZW_Neuroblastom_E22965-08_3_RA3_01_4008.d	SwissProt-human-oReAlk2019_Mascot_2019-10-14 16:08:34	Protein Search
634.882	-0.110099	1268.76	1268.76	26.3 (M.expect:0.0,M.score:26.3)	45 - 55	K.ELLLQPVTISR.N	53978	ARPC4_HUMAN	Actin-related protein 2/3 complex subunit 4 OS=Homo sapiens OX=9606 GN=ARPC4 PE=1 SV=3	1099		TRUE	7802	1267.75	634.882	1267.75	2	-6.99001e-05	-0.0001398	-0.110187	2.04931	0.00103449	9.02853	0.00969755	48.8331	1	1		1	19.567	0				CID	/Neuroblastom-Imaging/Imaging-Sample1/ZW_Neuroblastom_E22965-08_3_RA3_01_4008.d/+MS2(634.8822), 33.0eV, 48.8min #13713	ZW_Neuroblastom_E22965-08_3_RA3_01_4008.d	SwissProt-human-oReAlk2019_Mascot_2019-10-14 16:08:34	Protein Search
630.808	1.16327	1260.61	1260.61	45.8 (M.expect:0.0,M.score:45.8)	115 - 125	K.EQISDIDDAVR.K	174376	TCP4_HUMAN	Activated RNA polymerase II transcriptional coactivator p15 OS=Homo sapiens OX=9606 GN=SUB1 PE=1 SV=3	1059		TRUE	7060	1259.6	630.807	1259.6	2	0.000733801	0.0014676	1.1642	11.8135	0.00695061	17.8678	0.0101499	32.4046	1	1		1	30.099	0				CID	/Neuroblastom-Imaging/Imaging-Sample1/ZW_Neuroblastom_E22965-08_3_RA3_01_4008.d/+MS2(630.8077), 33.0eV, 32.4min #8669	ZW_Neuroblastom_E22965-08_3_RA3_01_4008.d	SwissProt-human-oReAlk2019_Mascot_2019-10-14 16:08:34	Protein Search
699.853	0.341744	1398.7	1398.7	33.2 (M.expect:0.0,M.score:33.2)	718 - 728	R.TYEQMEFPLLK.K	19584	ADNP_HUMAN	Activity-dependent neuroprotector homeobox protein OS=Homo sapiens OX=9606 GN=ADNP PE=1 SV=1	1624		TRUE	12260	1397.69	699.852	1397.69	2	0.00023917	0.00047834	0.34199	3.66904	0.00247846	4.69873	0.00316072	52.619	1	1		1	13.5176	0				CID	/Neuroblastom-Imaging/Imaging-Sample1/ZW_Neuroblastom_E22965-08_3_RA3_01_4008.d/+MS2(699.8526), 33.0eV, 52.6min #14717	ZW_Neuroblastom_E22965-08_3_RA3_01_4008.d	SwissProt-human-oReAlk2019_Mascot_2019-10-14 16:08:34	Protein Search
940.515	-0.424372	1880.02	1880.02	26.7 (M.expect:0.0,M.score:26.7)	349 - 367	R.LGLGGNAPVSIPQQSQSVK.Q	36688	ADNP_HUMAN	Activity-dependent neuroprotector homeobox protein OS=Homo sapiens OX=9606 GN=ADNP PE=1 SV=1	3121		TRUE	8038	1879.02	940.515	1879.02	2	-0.000399128	-0.000798256	-0.424599	29.0625	0.0130046	67.4134	0.0177559	40.8169	1	1		1	22.2038	0				CID	/Neuroblastom-Imaging/Imaging-Sample1/ZW_Neuroblastom_E22965-08_3_RA3_01_4008.d/+MS2(940.5150), 52.1eV, 40.8min #11443	ZW_Neuroblastom_E22965-08_3_RA3_01_4008.d	SwissProt-human-oReAlk2019_Mascot_2019-10-14 16:08:34	Protein Search
566.806	-2.51417	1132.6	1132.61	14.6 (M.expect:0.0,M.score:14.6)	180 - 189	R.GMIPVPYVEK.Y	24522	CRK_HUMAN	Adapter molecule crk OS=Homo sapiens OX=9606 GN=CRK PE=1 SV=2	655		TRUE	7349	1131.6	566.807	1131.6	2	-0.00142504	-0.00285009	-2.5164	14.4755	0.00892867	31.3112	0.0140277	44.4022	1	1		1	13.8379	0				CID	/Neuroblastom-Imaging/Imaging-Sample1/ZW_Neuroblastom_E22965-08_3_RA3_01_4008.d/+MS2(566.8058), 31.0eV, 44.4min #12487	ZW_Neuroblastom_E22965-08_3_RA3_01_4008.d	SwissProt-human-oReAlk2019_Mascot_2019-10-14 16:08:34	Protein Search
623.861	-0.813471	1246.71	1246.72	14.0 (M.expect:0.0,M.score:14.0)	181 - 194	R.GGGLSLLPPPPGGK.V	20390	NECP1_HUMAN	Adaptin ear-binding coat-associated protein 1 OS=Homo sapiens OX=9606 GN=NECAP1 PE=1 SV=2	1019		TRUE	7039	1245.71	623.861	1245.71	2	-0.000507493	-0.00101499	-0.814128	24.4246	0.00683782	31.5202	0.0103073	43.3845	1	1		1	13.6889	0				CID	/Neuroblastom-Imaging/Imaging-Sample1/ZW_Neuroblastom_E22965-08_3_RA3_01_4008.d/+MS2(623.8608), 33.0eV, 43.4min #12196	ZW_Neuroblastom_E22965-08_3_RA3_01_4008.d	SwissProt-human-oReAlk2019_Mascot_2019-10-14 16:08:34	Protein Search
561.792	-2.8134	1122.58	1122.58	33.2 (M.expect:0.0,M.score:33.2)	58 - 67	R.IDYIAGLDSR.G	21840	APT_HUMAN	Adenine phosphoribosyltransferase OS=Homo sapiens OX=9606 GN=APRT PE=1 SV=2	633		TRUE	5558	1121.57	561.793	1121.57	2	-0.00158054	-0.00316108	-2.81592	8.30966	0.00619243	10.8336	0.00787229	40.1078	1	1		1	15.0096	0				CID	/Neuroblastom-Imaging/Imaging-Sample1/ZW_Neuroblastom_E22965-08_3_RA3_01_4008.d/+MS2(561.7915), 30.7eV, 40.1min #11226	ZW_Neuroblastom_E22965-08_3_RA3_01_4008.d	SwissProt-human-oReAlk2019_Mascot_2019-10-14 16:08:34	Protein Search
665.336	-0.106668	1329.66	1329.66	42.5 (M.expect:0.0,M.score:42.5)	2 - 12	M.ADSELQLVEQR.I	103130	APT_HUMAN	Adenine phosphoribosyltransferase OS=Homo sapiens OX=9606 GN=APRT PE=1 SV=2	1362		TRUE	11345	1328.66	665.336	1328.66	2	-7.09703e-05	-0.000141941	-0.106749	6.48472	0.00473771	19.631	0.0140426	50.1599	1	1		1	36.6378	0	Acetyl: 1			CID	/Neuroblastom-Imaging/Imaging-Sample1/ZW_Neuroblastom_E22965-08_3_RA3_01_4008.d/+MS2(665.3358), 33.0eV, 50.2min #14067	ZW_Neuroblastom_E22965-08_3_RA3_01_4008.d	SwissProt-human-oReAlk2019_Mascot_2019-10-14 16:08:34	Protein Search
482.266	1.8674	1444.78	1444.78	32.6 (M.expect:0.0,M.score:32.6)	28 - 40	R.DISPVLKDPASFR.A	28370	APT_HUMAN	Adenine phosphoribosyltransferase OS=Homo sapiens OX=9606 GN=APRT PE=1 SV=2	1756		TRUE	9502	1443.77	482.265	1443.77	3	0.000900581	0.00270174	1.87	6.78214	0.00463526	32.0658	0.0108685	40.6068	1	1		1	16.5731	1				CID	/Neuroblastom-Imaging/Imaging-Sample1/ZW_Neuroblastom_E22965-08_3_RA3_01_4008.d/+MS2(482.2656), 24.6eV, 40.6min #11385	ZW_Neuroblastom_E22965-08_3_RA3_01_4008.d	SwissProt-human-oReAlk2019_Mascot_2019-10-14 16:08:34	Protein Search
733.376	-2.08856	1465.74	1465.75	25.8 (M.expect:0.0,M.score:25.8)	15 - 27	R.SFPDFPTPGVVFR.D	14314	APT_HUMAN	Adenine phosphoribosyltransferase OS=Homo sapiens OX=9606 GN=APRT PE=1 SV=2	1803		TRUE	14912	1464.74	733.377	1464.74	2	-0.0015317	-0.0030634	-2.08999	7.20276	0.00485107	9.79883	0.00716593	60.2647	4	1		1	18.5175	0				CID	/Neuroblastom-Imaging/Imaging-Sample1/ZW_Neuroblastom_E22965-08_3_RA3_01_4008.d/+MS2(733.3758), 37.0eV, 60.3min #16710	ZW_Neuroblastom_E22965-08_3_RA3_01_4008.d	SwissProt-human-oReAlk2019_Mascot_2019-10-14 16:08:34	Protein Search
733.376	-1.54313	1465.75	1465.75	19.2 (M.expect:0.0,M.score:19.2)	15 - 27	R.SFPDFPTPGVVFR.D	9254	APT_HUMAN	Adenine phosphoribosyltransferase OS=Homo sapiens OX=9606 GN=APRT PE=1 SV=2	1804		TRUE	15670	1464.74	733.377	1464.74	2	-0.0011317	-0.0022634	-1.54419	8.59506	0.00585399	11.2751	0.00814298	60.3804	4	1		1	14.0771	0				CID	/Neuroblastom-Imaging/Imaging-Sample1/ZW_Neuroblastom_E22965-08_3_RA3_01_4008.d/+MS2(733.3762), 37.0eV, 60.4min #16735	ZW_Neuroblastom_E22965-08_3_RA3_01_4008.d	SwissProt-human-oReAlk2019_Mascot_2019-10-14 16:08:34	Protein Search
733.376	-1.36587	1465.75	1465.75	32.6 (M.expect:0.0,M.score:32.6)	15 - 27	R.SFPDFPTPGVVFR.D	7996	APT_HUMAN	Adenine phosphoribosyltransferase OS=Homo sapiens OX=9606 GN=APRT PE=1 SV=2	1805		TRUE	14662	1464.74	733.377	1464.74	2	-0.0010017	-0.0020034	-1.36681	14.4492	0.00845514	17.12	0.014307	60.1162	4	1		1	9.76676	0				CID	/Neuroblastom-Imaging/Imaging-Sample1/ZW_Neuroblastom_E22965-08_3_RA3_01_4008.d/+MS2(733.3763), 37.0eV, 60.1min #16676	ZW_Neuroblastom_E22965-08_3_RA3_01_4008.d	SwissProt-human-oReAlk2019_Mascot_2019-10-14 16:08:34	Protein Search
733.377	-1.13407	1465.75	1465.75	24.7 (M.expect:0.0,M.score:24.7)	15 - 27	R.SFPDFPTPGVVFR.D	13466	APT_HUMAN	Adenine phosphoribosyltransferase OS=Homo sapiens OX=9606 GN=APRT PE=1 SV=2	1806		TRUE	14733	1464.74	733.377	1464.74	2	-0.000831698	-0.0016634	-1.13485	3.06679	0.00196852	4.29632	0.00264443	60.3126	4	1		1	12.0109	0				CID	/Neuroblastom-Imaging/Imaging-Sample1/ZW_Neuroblastom_E22965-08_3_RA3_01_4008.d/+MS2(733.3765), 37.0eV, 60.3min #16720	ZW_Neuroblastom_E22965-08_3_RA3_01_4008.d	SwissProt-human-oReAlk2019_Mascot_2019-10-14 16:08:34	Protein Search
780.381	-0.347007	1559.76	1559.76	27.0 (M.expect:0.0,M.score:27.0)	21 - 34	K.ALDIAENEMPGLMR.M	29340	SAHH_HUMAN	Adenosylhomocysteinase OS=Homo sapiens OX=9606 GN=AHCY PE=1 SV=4	2134		TRUE	11773	1558.75	780.381	1558.75	2	-0.000270798	-0.000541595	-0.347231	5.96099	0.00334235	7.51559	0.00451473	50.8327	1	1		1	21.1022	0				CID	/Neuroblastom-Imaging/Imaging-Sample1/ZW_Neuroblastom_E22965-08_3_RA3_01_4008.d/+MS2(780.3812), 42.6eV, 50.8min #14249	ZW_Neuroblastom_E22965-08_3_RA3_01_4008.d	SwissProt-human-oReAlk2019_Mascot_2019-10-14 16:08:34	Protein Search
625.787	2.31102	1250.57	1250.56	25.1 (M.expect:0.0,M.score:25.1)	98 - 107	R.EVQQGEEFER.R	81900	KAD1_HUMAN	Adenylate kinase isoenzyme 1 OS=Homo sapiens OX=9606 GN=AK1 PE=1 SV=3	1028		TRUE	3452	1249.56	625.786	1249.56	2	0.00144621	0.00289242	2.31288	12.5468	0.00682061	29.8984	0.0148035	20.0059	1	1		1	14.2614	0				CID	/Neuroblastom-Imaging/Imaging-Sample1/ZW_Neuroblastom_E22965-08_3_RA3_01_4008.d/+MS2(625.7875), 33.0eV, 20.0min #4166	ZW_Neuroblastom_E22965-08_3_RA3_01_4008.d	SwissProt-human-oReAlk2019_Mascot_2019-10-14 16:08:34	Protein Search
559.269	-0.152875	1117.53	1117.53	35.7 (M.expect:0.0,M.score:35.7)	2 - 10	M.ADMQNLVER.L	289378	CAP1_HUMAN	Adenylyl cyclase-associated protein 1 OS=Homo sapiens OX=9606 GN=CAP1 PE=1 SV=5	612		TRUE	5147	1116.52	559.269	1116.52	2	-8.54981e-05	-0.000170996	-0.153013	4.66917	0.0026321	5.02932	0.00322039	45.7575	2	1		1	33.815	0	Acetyl: 1			CID	/Neuroblastom-Imaging/Imaging-Sample1/ZW_Neuroblastom_E22965-08_3_RA3_01_4008.d/+MS2(559.2689), 30.6eV, 45.8min #12851	ZW_Neuroblastom_E22965-08_3_RA3_01_4008.d	SwissProt-human-oReAlk2019_Mascot_2019-10-14 16:08:34	Protein Search
559.269	0.312018	1117.53	1117.53	33.1 (M.expect:0.0,M.score:33.1)	2 - 10	M.ADMQNLVER.L	94644	CAP1_HUMAN	Adenylyl cyclase-associated protein 1 OS=Homo sapiens OX=9606 GN=CAP1 PE=1 SV=5	613		TRUE	8002	1116.52	559.269	1116.52	2	0.000174502	0.000349004	0.312299	6.23077	0.0030869	7.44557	0.00393805	45.7089	2	1		1	16.5425	0	Acetyl: 1			CID	/Neuroblastom-Imaging/Imaging-Sample1/ZW_Neuroblastom_E22965-08_3_RA3_01_4008.d/+MS2(559.2691), 30.6eV, 45.7min #12838	ZW_Neuroblastom_E22965-08_3_RA3_01_4008.d	SwissProt-human-oReAlk2019_Mascot_2019-10-14 16:08:34	Protein Search
548.289	-4.04853	1642.85	1642.86	17.5 (M.expect:0.0,M.score:17.5)	778 - 793	R.TPTQEQLLAAAMAAAR.G	6548	AEBP1_HUMAN	Adipocyte enhancer-binding protein 1 OS=Homo sapiens OX=9606 GN=AEBP1 PE=1 SV=1	2498		TRUE	14714	1641.84	548.291	1641.85	3	-0.00221976	-0.00665928	-4.05349	34.7517	0.0141041	98.0715	0.0209489	54.148	1	1		1	10.4228	0				CID	/Neuroblastom-Imaging/Imaging-Sample1/ZW_Neuroblastom_E22965-08_3_RA3_01_4008.d/+MS2(548.2887), 26.0eV, 54.2min #15127	ZW_Neuroblastom_E22965-08_3_RA3_01_4008.d	SwissProt-human-oReAlk2019_Mascot_2019-10-14 16:08:34	Protein Search
739.931	-1.7989	1478.86	1478.86	22.6 (M.expect:0.0,M.score:22.6)	291 - 304	K.VLELDPALAPVVSR.E	10374	AIP_HUMAN	AH receptor-interacting protein OS=Homo sapiens OX=9606 GN=AIP PE=1 SV=2	1869		TRUE	12328	1477.85	739.932	1477.85	2	-0.00133106	-0.00266213	-1.80013	3.85787	0.00277686	7.78966	0.00529235	54.7616	2	1		1	26.7793	0				CID	/Neuroblastom-Imaging/Imaging-Sample1/ZW_Neuroblastom_E22965-08_3_RA3_01_4008.d/+MS2(739.9312), 37.8eV, 54.8min #15305	ZW_Neuroblastom_E22965-08_3_RA3_01_4008.d	SwissProt-human-oReAlk2019_Mascot_2019-10-14 16:08:34	Protein Search
739.932	-0.744748	1478.86	1478.86	55.6 (M.expect:0.0,M.score:55.6)	291 - 304	K.VLELDPALAPVVSR.E	33124	AIP_HUMAN	AH receptor-interacting protein OS=Homo sapiens OX=9606 GN=AIP PE=1 SV=2	1870		TRUE	11640	1477.85	739.932	1477.85	2	-0.000551063	-0.00110213	-0.745256	7.19862	0.00476654	14.6756	0.0105955	54.8576	2	1		1	37.9978	0				CID	/Neuroblastom-Imaging/Imaging-Sample1/ZW_Neuroblastom_E22965-08_3_RA3_01_4008.d/+MS2(739.9319), 37.8eV, 54.9min #15326	ZW_Neuroblastom_E22965-08_3_RA3_01_4008.d	SwissProt-human-oReAlk2019_Mascot_2019-10-14 16:08:34	Protein Search
608.334	2.15368	1215.66	1215.66	29.7 (M.expect:0.0,M.score:29.7)	1,039 - 1,049	R.TQEVLQAVAEK.V	73102	AKA12_HUMAN	A-kinase anchor protein 12 OS=Homo sapiens OX=9606 GN=AKAP12 PE=1 SV=4	915		TRUE	3756	1214.65	608.333	1214.65	2	0.00131016	0.00262031	2.15547	8.84229	0.00429017	19.975	0.0129558	28.1851	1	1		1	12.2281	0				CID	/Neuroblastom-Imaging/Imaging-Sample1/ZW_Neuroblastom_E22965-08_3_RA3_01_4008.d/+MS2(608.3339), 33.0eV, 28.2min #7209	ZW_Neuroblastom_E22965-08_3_RA3_01_4008.d	SwissProt-human-oReAlk2019_Mascot_2019-10-14 16:08:34	Protein Search
558.319	1.71955	1115.63	1115.63	34.0 (M.expect:0.0,M.score:34.0)	14 - 23	K.MPLIGLGTWK.S	16156	AK1A1_HUMAN	Aldo-keto reductase family 1 member A1 OS=Homo sapiens OX=9606 GN=AKR1A1 PE=1 SV=3	606		TRUE	12671	1114.62	558.318	1114.62	2	0.000960059	0.00192012	1.72111	11.6169	0.00500777	13.6965	0.00864107	53.1749	1	1		1	23.9271	0				CID	/Neuroblastom-Imaging/Imaging-Sample1/ZW_Neuroblastom_E22965-08_3_RA3_01_4008.d/+MS2(558.3187), 30.5eV, 53.2min #14857	ZW_Neuroblastom_E22965-08_3_RA3_01_4008.d	SwissProt-human-oReAlk2019_Mascot_2019-10-14 16:08:34	Protein Search
566.315	-0.507564	1131.62	1131.62	36.5 (M.expect:0.0,M.score:36.5)	14 - 23	K.MPLIGLGTWK.S	21328	AK1A1_HUMAN	Aldo-keto reductase family 1 member A1 OS=Homo sapiens OX=9606 GN=AKR1A1 PE=1 SV=3	653		TRUE	8472	1130.62	566.315	1130.62	2	-0.000287441	-0.000574883	-0.508016	6.40918	0.00274052	8.25861	0.00319284	46.5409	1	1		1	9.06999	0	Oxidation: 1			CID	/Neuroblastom-Imaging/Imaging-Sample1/ZW_Neuroblastom_E22965-08_3_RA3_01_4008.d/+MS2(566.3149), 31.0eV, 46.6min #13082	ZW_Neuroblastom_E22965-08_3_RA3_01_4008.d	SwissProt-human-oReAlk2019_Mascot_2019-10-14 16:08:34	Protein Search
618.336	-4.23607	1235.67	1235.67	20.8 (M.expect:0.0,M.score:20.8)	298 - 308	R.YIVPMLTVDGK.R	15960	AK1A1_HUMAN	Aldo-keto reductase family 1 member A1 OS=Homo sapiens OX=9606 GN=AKR1A1 PE=1 SV=3	989		TRUE	11457	1234.66	618.339	1234.66	2	-0.00261931	-0.00523863	-4.23952	6.3797	0.0038657	6.88911	0.00470398	50.9872	1	1		1	17.7753	0				CID	/Neuroblastom-Imaging/Imaging-Sample1/ZW_Neuroblastom_E22965-08_3_RA3_01_4008.d/+MS2(618.3362), 33.0eV, 51.0min #14288	ZW_Neuroblastom_E22965-08_3_RA3_01_4008.d	SwissProt-human-oReAlk2019_Mascot_2019-10-14 16:08:34	Protein Search
753.338	-0.694911	1505.67	1505.67	21.0 (M.expect:0.0,M.score:21.0)	313 - 325	R.DAGHPLYPFNDPY.-	70114	AK1A1_HUMAN	Aldo-keto reductase family 1 member A1 OS=Homo sapiens OX=9606 GN=AKR1A1 PE=1 SV=3	1945		TRUE	11463	1504.66	753.338	1504.66	2	-0.000523502	-0.001047	-0.695375	3.93371	0.00325708	7.21329	0.00806884	52.1542	1	1		1	34.7535	0				CID	/Neuroblastom-Imaging/Imaging-Sample1/ZW_Neuroblastom_E22965-08_3_RA3_01_4008.d/+MS2(753.3379), 39.4eV, 52.2min #14592	ZW_Neuroblastom_E22965-08_3_RA3_01_4008.d	SwissProt-human-oReAlk2019_Mascot_2019-10-14 16:08:34	Protein Search
776.384	-2.84908	1551.76	1551.76	24.4 (M.expect:0.0,M.score:24.4)	204 - 218	R.GLEVTAYSPLGSSDR.A	30608	AK1A1_HUMAN	Aldo-keto reductase family 1 member A1 OS=Homo sapiens OX=9606 GN=AKR1A1 PE=1 SV=3	2121		TRUE	8449	1550.75	776.386	1550.76	2	-0.00221198	-0.00442395	-2.85093	1.53904	0.00110778	2.32221	0.00217984	43.4858	1	1		1	10.8502	0				CID	/Neuroblastom-Imaging/Imaging-Sample1/ZW_Neuroblastom_E22965-08_3_RA3_01_4008.d/+MS2(776.3839), 42.2eV, 43.5min #12227	ZW_Neuroblastom_E22965-08_3_RA3_01_4008.d	SwissProt-human-oReAlk2019_Mascot_2019-10-14 16:08:34	Protein Search
681.334	-3.96594	1361.66	1361.67	32.7 (M.expect:0.0,M.score:32.7)	123 - 136	K.ANEGTVGVSAATER.S	42856	PPBT_HUMAN	Alkaline phosphatase, tissue-nonspecific isozyme OS=Homo sapiens OX=9606 GN=ALPL PE=1 SV=4	1495		TRUE	2188	1360.65	681.336	1360.66	2	-0.00270213	-0.00540426	-3.96888	6.8901	0.00390457	10.3964	0.00555223	20.8538	1	1		1	12.533	0				CID	/Neuroblastom-Imaging/Imaging-Sample1/ZW_Neuroblastom_E22965-08_3_RA3_01_4008.d/+MS2(681.3337), 33.0eV, 20.9min #4504	ZW_Neuroblastom_E22965-08_3_RA3_01_4008.d	SwissProt-human-oReAlk2019_Mascot_2019-10-14 16:08:34	Protein Search
946.44	0.800057	1891.87	1891.87	24.1 (M.expect:0.0,M.score:24.1)	160 - 177	R.LYGSEAFATDFQDSAAAK.K	46744	AACT_HUMAN	Alpha-1-antichymotrypsin OS=Homo sapiens OX=9606 GN=SERPINA3 PE=1 SV=2	3141		TRUE	9365	1890.87	946.439	1890.86	2	0.000757206	0.00151441	0.800483	7.83108	0.00576559	9.02051	0.00651978	45.5096	1	1		1	9.4617	0				CID	/Neuroblastom-Imaging/Imaging-Sample1/ZW_Neuroblastom_E22965-08_3_RA3_01_4008.d/+MS2(946.4398), 52.3eV, 45.5min #12784	ZW_Neuroblastom_E22965-08_3_RA3_01_4008.d	SwissProt-human-oReAlk2019_Mascot_2019-10-14 16:08:34	Protein Search
390.211	3.35832	779.415	779.412	15.0 (M.expect:0.0,M.score:15.0)	405 - 411	K.SPLFMGK.V	26176	A1AT_HUMAN	Alpha-1-antitrypsin OS=Homo sapiens OX=9606 GN=SERPINA1 PE=1 SV=3	27		TRUE	9100	778.407	390.21	778.405	2	0.00131045	0.0026209	3.36266	3.34515	0.00162391	89.3397	0.0165928	28.8182	1	1		1	6.78488	0				CID	/Neuroblastom-Imaging/Imaging-Sample1/ZW_Neuroblastom_E22965-08_3_RA3_01_4008.d/+MS2(390.2110), 23.0eV, 28.8min #7430	ZW_Neuroblastom_E22965-08_3_RA3_01_4008.d	SwissProt-human-oReAlk2019_Mascot_2019-10-14 16:08:34	Protein Search
508.311	0.473816	1015.62	1015.61	27.3 (M.expect:0.0,M.score:27.3)	325 - 334	K.SVLGQLGITK.V	91524	A1AT_HUMAN	Alpha-1-antitrypsin OS=Homo sapiens OX=9606 GN=SERPINA1 PE=1 SV=3	369		TRUE	10756	1014.61	508.311	1014.61	2	0.000240846	0.000481692	0.474286	21.9419	0.0132426	44.045	0.0187105	40.1904	1	1		1	20.8312	0				CID	/Neuroblastom-Imaging/Imaging-Sample1/ZW_Neuroblastom_E22965-08_3_RA3_01_4008.d/+MS2(508.3112), 27.5eV, 40.2min #11248	ZW_Neuroblastom_E22965-08_3_RA3_01_4008.d	SwissProt-human-oReAlk2019_Mascot_2019-10-14 16:08:34	Protein Search
544.796	0.665236	1088.59	1088.58	30.1 (M.expect:0.0,M.score:30.1)	407 - 417	R.ATWSGAVLAGR.D	63818	A1BG_HUMAN	Alpha-1B-glycoprotein OS=Homo sapiens OX=9606 GN=A1BG PE=1 SV=4	546		TRUE	4962	1087.58	544.796	1087.58	2	0.000362418	0.000724837	0.665852	21.6715	0.0122153	42.9167	0.0178375	33.7052	1	1		1	15.7623	0				CID	/Neuroblastom-Imaging/Imaging-Sample1/ZW_Neuroblastom_E22965-08_3_RA3_01_4008.d/+MS2(544.7964), 29.7eV, 33.7min #9114	ZW_Neuroblastom_E22965-08_3_RA3_01_4008.d	SwissProt-human-oReAlk2019_Mascot_2019-10-14 16:08:34	Protein Search
632.83	-0.875954	1264.65	1264.65	30.9 (M.expect:0.0,M.score:30.9)	95 - 106	R.SGLSTGWTQLSK.L	34342	A1BG_HUMAN	Alpha-1B-glycoprotein OS=Homo sapiens OX=9606 GN=A1BG PE=1 SV=4	1080		TRUE	4818	1263.64	632.83	1263.65	2	-0.00055433	-0.00110866	-0.876652	3.04352	0.00219074	3.4985	0.00278787	36.0557	1	1		1	12.0008	0				CID	/Neuroblastom-Imaging/Imaging-Sample1/ZW_Neuroblastom_E22965-08_3_RA3_01_4008.d/+MS2(632.8297), 33.0eV, 36.1min #9915	ZW_Neuroblastom_E22965-08_3_RA3_01_4008.d	SwissProt-human-oReAlk2019_Mascot_2019-10-14 16:08:34	Protein Search
558.806	0.284621	1116.61	1116.6	40.1 (M.expect:0.0,M.score:40.1)	854 - 863	R.QTVSWAVTPK.S	140738	A2MG_HUMAN	Alpha-2-macroglobulin OS=Homo sapiens OX=9606 GN=A2M PE=1 SV=3	609		TRUE	6596	1115.6	558.806	1115.6	2	0.000159048	0.000318096	0.284878	10.4592	0.00860695	16.0593	0.0125713	31.3023	1	1		1	20.5181	0				CID	/Neuroblastom-Imaging/Imaging-Sample1/ZW_Neuroblastom_E22965-08_3_RA3_01_4008.d/+MS2(558.8062), 30.5eV, 31.3min #8284	ZW_Neuroblastom_E22965-08_3_RA3_01_4008.d	SwissProt-human-oReAlk2019_Mascot_2019-10-14 16:08:34	Protein Search
628.326	0.908507	1255.64	1255.64	69.0 (M.expect:0.0,M.score:69.0)	1,004 - 1,014	K.AIGYLNTGYQR.Q	408888	A2MG_HUMAN	Alpha-2-macroglobulin OS=Homo sapiens OX=9606 GN=A2M PE=1 SV=3	1052		TRUE	3236	1254.64	628.325	1254.64	2	0.000570838	0.00114168	0.909235	2.59964	0.00148883	3.43759	0.00321755	31.1462	1	1		1	47.9903	0				CID	/Neuroblastom-Imaging/Imaging-Sample1/ZW_Neuroblastom_E22965-08_3_RA3_01_4008.d/+MS2(628.3257), 33.0eV, 31.1min #8227	ZW_Neuroblastom_E22965-08_3_RA3_01_4008.d	SwissProt-human-oReAlk2019_Mascot_2019-10-14 16:08:34	Protein Search
638.288	0.963125	1275.57	1275.57	29.2 (M.expect:0.0,M.score:29.2)	705 - 715	R.VGFYESDVMGR.G	128672	A2MG_HUMAN	Alpha-2-macroglobulin OS=Homo sapiens OX=9606 GN=A2M PE=1 SV=3	1155		TRUE	7813	1274.56	638.287	1274.56	2	0.000614751	0.0012295	0.963886	6.02507	0.00364551	47.4427	0.00894955	30.1548	1	1		1	16.7401	0	Oxidation: 9			CID	/Neuroblastom-Imaging/Imaging-Sample1/ZW_Neuroblastom_E22965-08_3_RA3_01_4008.d/+MS2(638.2880), 33.0eV, 30.2min #7873	ZW_Neuroblastom_E22965-08_3_RA3_01_4008.d	SwissProt-human-oReAlk2019_Mascot_2019-10-14 16:08:34	Protein Search
451.62	2.55329	1352.84	1352.84	33.4 (M.expect:0.0,M.score:33.4)	376 - 387	K.GVPIPNKVIFIR.G	43572	A2MG_HUMAN	Alpha-2-macroglobulin OS=Homo sapiens OX=9606 GN=A2M PE=1 SV=3	1437		TRUE	12526	1351.84	451.619	1351.83	3	0.00115312	0.00345935	2.55709	7.34553	0.00557411	16.3452	0.0128021	42.7589	1	1		1	23.2908	1				CID	/Neuroblastom-Imaging/Imaging-Sample1/ZW_Neuroblastom_E22965-08_3_RA3_01_4008.d/+MS2(451.6198), 24.0eV, 42.8min #12020	ZW_Neuroblastom_E22965-08_3_RA3_01_4008.d	SwissProt-human-oReAlk2019_Mascot_2019-10-14 16:08:34	Protein Search
697.843	-0.513969	1394.68	1394.68	56.9 (M.expect:0.0,M.score:56.9)	124 - 135	K.NEDSLVFVQTDK.S	25282	A2MG_HUMAN	Alpha-2-macroglobulin OS=Homo sapiens OX=9606 GN=A2M PE=1 SV=3	1609		TRUE	6256	1393.67	697.844	1393.67	2	-0.00035867	-0.00071734	-0.514341	8.03473	0.00513776	23.4819	0.00883406	38.7126	1	1		1	19.9533	0				CID	/Neuroblastom-Imaging/Imaging-Sample1/ZW_Neuroblastom_E22965-08_3_RA3_01_4008.d/+MS2(697.8432), 33.0eV, 38.7min #10793	ZW_Neuroblastom_E22965-08_3_RA3_01_4008.d	SwissProt-human-oReAlk2019_Mascot_2019-10-14 16:08:34	Protein Search
756.389	0.628426	1511.77	1511.77	37.8 (M.expect:0.0,M.score:37.8)	1,275 - 1,289	K.AAQVTIQSSGTFSSK.F	176866	A2MG_HUMAN	Alpha-2-macroglobulin OS=Homo sapiens OX=9606 GN=A2M PE=1 SV=3	1956		TRUE	6569	1510.76	756.389	1510.76	2	0.000475335	0.000950669	0.628845	7.15224	0.0057541	14.3463	0.0112986	27.6132	1	1		1	20.2647	0				CID	/Neuroblastom-Imaging/Imaging-Sample1/ZW_Neuroblastom_E22965-08_3_RA3_01_4008.d/+MS2(756.3891), 39.8eV, 27.6min #6996	ZW_Neuroblastom_E22965-08_3_RA3_01_4008.d	SwissProt-human-oReAlk2019_Mascot_2019-10-14 16:08:34	Protein Search
558.291	0.0104432	1672.86	1672.86	33.2 (M.expect:0.0,M.score:33.2)	215 - 228	R.TEHPFTVEEFVLPK.F	68864	A2MG_HUMAN	Alpha-2-macroglobulin OS=Homo sapiens OX=9606 GN=A2M PE=1 SV=3	2589		TRUE	8723	1671.85	558.291	1671.85	3	5.83034e-06	1.7491e-05	0.0104558	5.63272	0.00447602	7.29273	0.00636725	47.3979	1	1		1	15.023	0				CID	/Neuroblastom-Imaging/Imaging-Sample1/ZW_Neuroblastom_E22965-08_3_RA3_01_4008.d/+MS2(558.2909), 26.2eV, 47.4min #13320	ZW_Neuroblastom_E22965-08_3_RA3_01_4008.d	SwissProt-human-oReAlk2019_Mascot_2019-10-14 16:08:34	Protein Search
594.007	-2.39955	1780.01	1780.01	52.9 (M.expect:0.0,M.score:52.9)	897 - 912	K.DTVIKPLLVEPEGLEK.E	12598	A2MG_HUMAN	Alpha-2-macroglobulin OS=Homo sapiens OX=9606 GN=A2M PE=1 SV=3	2949		TRUE	7471	1779	594.008	1779	3	-0.00142535	-0.00427605	-2.40227	3.35141	0.00207682	21.1404	0.013624	49.3116	2	1		1	28.0292	0				CID	/Neuroblastom-Imaging/Imaging-Sample1/ZW_Neuroblastom_E22965-08_3_RA3_01_4008.d/+MS2(594.0068), 26.9eV, 49.3min #13840	ZW_Neuroblastom_E22965-08_3_RA3_01_4008.d	SwissProt-human-oReAlk2019_Mascot_2019-10-14 16:08:34	Protein Search
594.008	0.277182	1780.01	1780.01	32.5 (M.expect:0.0,M.score:32.5)	897 - 912	K.DTVIKPLLVEPEGLEK.E	43118	A2MG_HUMAN	Alpha-2-macroglobulin OS=Homo sapiens OX=9606 GN=A2M PE=1 SV=3	2950		TRUE	7754	1779	594.008	1779	3	0.000164648	0.000493945	0.277496	5.14236	0.00306524	5.6629	0.00349397	49.3462	2	1		1	22.9694	0				CID	/Neuroblastom-Imaging/Imaging-Sample1/ZW_Neuroblastom_E22965-08_3_RA3_01_4008.d/+MS2(594.0084), 26.9eV, 49.4min #13846	ZW_Neuroblastom_E22965-08_3_RA3_01_4008.d	SwissProt-human-oReAlk2019_Mascot_2019-10-14 16:08:34	Protein Search
669.81	1.76773	1338.61	1338.61	49.3 (M.expect:0.0,M.score:49.3)	742 - 752	K.GISQEQMNEFR.A	70118	ACTN1_HUMAN	Alpha-actinin-1 OS=Homo sapiens OX=9606 GN=ACTN1 PE=1 SV=2	1386		TRUE	4625	1337.61	669.809	1337.6	2	0.00118404	0.00236808	1.76906	9.23984	0.00695795	22.9762	0.0103089	28.4964	1	1		1	21.217	0				CID	/Neuroblastom-Imaging/Imaging-Sample1/ZW_Neuroblastom_E22965-08_3_RA3_01_4008.d/+MS2(669.8102), 33.0eV, 28.5min #7320	ZW_Neuroblastom_E22965-08_3_RA3_01_4008.d	SwissProt-human-oReAlk2019_Mascot_2019-10-14 16:08:34	Protein Search
610.621	1.92919	1829.85	1829.85	22.7 (M.expect:0.0,M.score:22.7)	24 - 37	R.YFDRVDENNPEYLR.E	85972	ADDA_HUMAN	Alpha-adducin OS=Homo sapiens OX=9606 GN=ADD1 PE=1 SV=2	3036		TRUE	5435	1828.84	610.62	1828.84	3	0.001178	0.00353401	1.93131	9.94615	0.00844502	60.0101	0.0126442	33.1894	1	1		1	18.3872	1				CID	/Neuroblastom-Imaging/Imaging-Sample1/ZW_Neuroblastom_E22965-08_3_RA3_01_4008.d/+MS2(610.6211), 27.0eV, 33.2min #8940	ZW_Neuroblastom_E22965-08_3_RA3_01_4008.d	SwissProt-human-oReAlk2019_Mascot_2019-10-14 16:08:34	Protein Search
634.012	2.57266	1900.02	1900.02	14.0 (M.expect:0.0,M.score:14.0)	480 - 497	R.TSTSAVPNLFVPLNTNPK.E	9960	ADDA_HUMAN	Alpha-adducin OS=Homo sapiens OX=9606 GN=ADD1 PE=1 SV=2	3151		TRUE	11797	1899.02	634.011	1899.01	3	0.0016311	0.0048933	2.57539	10.5432	0.0069869	13.9664	0.00993731	53.6816	2	1		1	15.2348	0				CID	/Neuroblastom-Imaging/Imaging-Sample1/ZW_Neuroblastom_E22965-08_3_RA3_01_4008.d/+MS2(634.0123), 27.0eV, 53.7min #14999	ZW_Neuroblastom_E22965-08_3_RA3_01_4008.d	SwissProt-human-oReAlk2019_Mascot_2019-10-14 16:08:34	Protein Search
950.511	-1.28891	1900.02	1900.02	32.3 (M.expect:0.0,M.score:32.3)	480 - 497	R.TSTSAVPNLFVPLNTNPK.E	37980	ADDA_HUMAN	Alpha-adducin OS=Homo sapiens OX=9606 GN=ADD1 PE=1 SV=2	3152		TRUE	10288	1899.01	950.512	1899.01	2	-0.00122512	-0.00245025	-1.28959	10.8303	0.00940827	12.2391	0.0119812	53.6227	2	1		1	13.3624	0				CID	/Neuroblastom-Imaging/Imaging-Sample1/ZW_Neuroblastom_E22965-08_3_RA3_01_4008.d/+MS2(950.5111), 52.6eV, 53.6min #14981	ZW_Neuroblastom_E22965-08_3_RA3_01_4008.d	SwissProt-human-oReAlk2019_Mascot_2019-10-14 16:08:34	Protein Search
615.348	-0.102287	1229.69	1229.69	24.4 (M.expect:0.0,M.score:24.4)	529 - 539	K.DLPLAQGIKFQ.-	22560	AL7A1_HUMAN	Alpha-aminoadipic semialdehyde dehydrogenase OS=Homo sapiens OX=9606 GN=ALDH7A1 PE=1 SV=5	963		TRUE	12000	1228.68	615.348	1228.68	2	-6.2942e-05	-0.000125884	-0.102371	11.5281	0.00843258	15.3187	0.0108848	54.9075	1	1		1	9.29306	1				CID	/Neuroblastom-Imaging/Imaging-Sample1/ZW_Neuroblastom_E22965-08_3_RA3_01_4008.d/+MS2(615.3480), 33.0eV, 54.9min #15337	ZW_Neuroblastom_E22965-08_3_RA3_01_4008.d	SwissProt-human-oReAlk2019_Mascot_2019-10-14 16:08:34	Protein Search
352.709	2.5763	704.411	704.409	17.3 (M.expect:0.0,M.score:17.3)	127 - 132	K.GVPLYR.H	104788	ENOA_HUMAN	Alpha-enolase OS=Homo sapiens OX=9606 GN=ENO1 PE=1 SV=2	8		TRUE	12908	703.404	352.708	703.402	2	0.000908685	0.00181737	2.57999	5.7841	0.00142963	5.7841	0.00142963	22.9472	1	1		1	24.4893	0				CID	/Neuroblastom-Imaging/Imaging-Sample1/ZW_Neuroblastom_E22965-08_3_RA3_01_4008.d/+MS2(352.7090), 23.0eV, 23.0min #5284	ZW_Neuroblastom_E22965-08_3_RA3_01_4008.d	SwissProt-human-oReAlk2019_Mascot_2019-10-14 16:08:34	Protein Search
713.367	0.911696	1425.73	1425.73	43.0 (M.expect:0.0,M.score:43.0)	270 - 281	R.YISPDQLADLYK.S	52400	ENOA_HUMAN	Alpha-enolase OS=Homo sapiens OX=9606 GN=ENO1 PE=1 SV=2	1693		TRUE	10535	1424.72	713.367	1424.72	2	0.000650374	0.00130075	0.91234	6.68961	0.00348204	8.36796	0.00468142	50.9805	1	1		1	22.1365	0				CID	/Neuroblastom-Imaging/Imaging-Sample1/ZW_Neuroblastom_E22965-08_3_RA3_01_4008.d/+MS2(713.3673), 34.6eV, 51.0min #14284	ZW_Neuroblastom_E22965-08_3_RA3_01_4008.d	SwissProt-human-oReAlk2019_Mascot_2019-10-14 16:08:34	Protein Search
902.975	-0.271852	1804.94	1804.94	20.0 (M.expect:0.0,M.score:20.0)	33 - 50	R.AAVPSGASTGIYEALELR.D	14756	ENOA_HUMAN	Alpha-enolase OS=Homo sapiens OX=9606 GN=ENO1 PE=1 SV=2	3000		TRUE	10902	1803.94	902.976	1803.94	2	-0.000245476	-0.000490951	-0.272004	6.5943	0.00734926	26.5584	0.0130542	52.2159	2	1		1	16.1096	0				CID	/Neuroblastom-Imaging/Imaging-Sample1/ZW_Neuroblastom_E22965-08_3_RA3_01_4008.d/+MS2(902.9754), 50.1eV, 52.2min #14610	ZW_Neuroblastom_E22965-08_3_RA3_01_4008.d	SwissProt-human-oReAlk2019_Mascot_2019-10-14 16:08:34	Protein Search
902.976	0.44799	1804.94	1804.94	40.3 (M.expect:0.0,M.score:40.3)	33 - 50	R.AAVPSGASTGIYEALELR.D	57486	ENOA_HUMAN	Alpha-enolase OS=Homo sapiens OX=9606 GN=ENO1 PE=1 SV=2	3001		TRUE	10193	1803.94	902.976	1803.94	2	0.000404524	0.000809049	0.44824	14.5411	0.0105244	25.1633	0.0177676	52.2563	2	1		1	22.0324	0				CID	/Neuroblastom-Imaging/Imaging-Sample1/ZW_Neuroblastom_E22965-08_3_RA3_01_4008.d/+MS2(902.9760), 50.1eV, 52.3min #14619	ZW_Neuroblastom_E22965-08_3_RA3_01_4008.d	SwissProt-human-oReAlk2019_Mascot_2019-10-14 16:08:34	Protein Search
647.328	-3.11793	1939.97	1939.98	13.3 (M.expect:0.0,M.score:13.3)	163 - 179	K.LAMQEFMILPVGAANFR.E	13230	ENOA_HUMAN	Alpha-enolase OS=Homo sapiens OX=9606 GN=ENO1 PE=1 SV=2	3323		TRUE	13328	1938.96	647.33	1938.97	3	-0.00201832	-0.00605497	-3.12116	6.09297	0.00377689	7.90338	0.0049594	57.5105	1	1		1	22.4843	0	Oxidation: 3, 7			CID	/Neuroblastom-Imaging/Imaging-Sample1/ZW_Neuroblastom_E22965-08_3_RA3_01_4008.d/+MS2(647.3284), 27.0eV, 57.5min #16021	ZW_Neuroblastom_E22965-08_3_RA3_01_4008.d	SwissProt-human-oReAlk2019_Mascot_2019-10-14 16:08:34	Protein Search
654.314	1.33548	1960.93	1960.92	45.1 (M.expect:0.0,M.score:45.1)	203 - 221	K.DATNVGDEGGFAPNILENK.E	51260	ENOA_HUMAN	Alpha-enolase OS=Homo sapiens OX=9606 GN=ENO1 PE=1 SV=2	3377		TRUE	9344	1959.92	654.313	1959.92	3	0.000873825	0.00262148	1.33686	7.70193	0.00619389	24.9493	0.0115364	50.875	2	1		1	37.8559	0				CID	/Neuroblastom-Imaging/Imaging-Sample1/ZW_Neuroblastom_E22965-08_3_RA3_01_4008.d/+MS2(654.3139), 27.0eV, 50.9min #14257	ZW_Neuroblastom_E22965-08_3_RA3_01_4008.d	SwissProt-human-oReAlk2019_Mascot_2019-10-14 16:08:34	Protein Search
654.315	3.33757	1960.93	1960.92	30.7 (M.expect:0.0,M.score:30.7)	203 - 221	K.DATNVGDEGGFAPNILENK.E	18162	ENOA_HUMAN	Alpha-enolase OS=Homo sapiens OX=9606 GN=ENO1 PE=1 SV=2	3378		TRUE	9503	1959.92	654.313	1959.92	3	0.00218383	0.00655148	3.341	6.56682	0.00524052	11.5217	0.0104534	50.7749	2	1		1	25.3019	0				CID	/Neuroblastom-Imaging/Imaging-Sample1/ZW_Neuroblastom_E22965-08_3_RA3_01_4008.d/+MS2(654.3153), 27.0eV, 50.8min #14233	ZW_Neuroblastom_E22965-08_3_RA3_01_4008.d	SwissProt-human-oReAlk2019_Mascot_2019-10-14 16:08:34	Protein Search
508.755	2.91814	1016.5	1016.5	22.7 (M.expect:0.0,M.score:22.7)	169 - 177	R.DGLAEEVQR.L	191952	AINX_HUMAN	Alpha-internexin OS=Homo sapiens OX=9606 GN=INA PE=1 SV=2	370		TRUE	4797	1015.5	508.754	1015.49	2	0.00148462	0.00296924	2.92103	11.5732	0.00574142	16.8898	0.00958443	24.5216	1	1		1	23.8911	0				CID	/Neuroblastom-Imaging/Imaging-Sample1/ZW_Neuroblastom_E22965-08_3_RA3_01_4008.d/+MS2(508.7555), 27.5eV, 24.5min #5872	ZW_Neuroblastom_E22965-08_3_RA3_01_4008.d	SwissProt-human-oReAlk2019_Mascot_2019-10-14 16:08:34	Protein Search
561.296	0.684033	1121.58	1121.58	15.4 (M.expect:0.0,M.score:15.4)	378 - 386	R.EYQDLLNVK.M	161794	AINX_HUMAN	Alpha-internexin OS=Homo sapiens OX=9606 GN=INA PE=1 SV=2	627		TRUE	8977	1120.58	561.295	1120.58	2	0.000383945	0.00076789	0.684647	3.6437	0.00185491	25.1472	0.0102186	37.9706	1	1		1	13.8102	0				CID	/Neuroblastom-Imaging/Imaging-Sample1/ZW_Neuroblastom_E22965-08_3_RA3_01_4008.d/+MS2(561.2959), 30.7eV, 38.0min #10554	ZW_Neuroblastom_E22965-08_3_RA3_01_4008.d	SwissProt-human-oReAlk2019_Mascot_2019-10-14 16:08:34	Protein Search
567.287	-2.97326	1133.57	1133.57	30.4 (M.expect:0.0,M.score:30.4)	291 - 300	K.FANLNEQAAR.S	130446	AINX_HUMAN	Alpha-internexin OS=Homo sapiens OX=9606 GN=INA PE=1 SV=2	656		TRUE	4354	1132.56	567.289	1132.56	2	-0.00168669	-0.00337338	-2.9759	7.53981	0.00583046	9.89524	0.00727812	22.6403	1	1		1	10.2378	0				CID	/Neuroblastom-Imaging/Imaging-Sample1/ZW_Neuroblastom_E22965-08_3_RA3_01_4008.d/+MS2(567.2868), 31.0eV, 22.6min #5171	ZW_Neuroblastom_E22965-08_3_RA3_01_4008.d	SwissProt-human-oReAlk2019_Mascot_2019-10-14 16:08:34	Protein Search
434.767	1.24777	868.526	868.525	38.0 (M.expect:0.0,M.score:38.0)	1,378 - 1,385	R.TPTPLALR.Y	45626	ANK1_HUMAN	Ankyrin-1 OS=Homo sapiens OX=9606 GN=ANK1 PE=1 SV=3	93		TRUE	9075	867.519	434.766	867.518	2	0.00054249	0.00108498	1.24922	4.66304	0.00199277	5.38081	0.00266498	29.7949	1	1		1	26.3845	0				CID	/Neuroblastom-Imaging/Imaging-Sample1/ZW_Neuroblastom_E22965-08_3_RA3_01_4008.d/+MS2(434.7667), 24.4eV, 29.8min #7757	ZW_Neuroblastom_E22965-08_3_RA3_01_4008.d	SwissProt-human-oReAlk2019_Mascot_2019-10-14 16:08:34	Protein Search
540.774	8.36681	1080.54	1080.53	19.0 (M.expect:0.0,M.score:19.0)	9 - 18	R.EADAATSFLR.A	196164	ANK1_HUMAN	Ankyrin-1 OS=Homo sapiens OX=9606 GN=ANK1 PE=1 SV=3	523		TRUE	5497	1079.53	540.77	1079.52	2	0.00452455	0.00904911	8.37461	4.19875	0.000926237	65.3244	0.0131407	34.067	1	1		1	13.5133	0				CID	/Neuroblastom-Imaging/Imaging-Sample1/ZW_Neuroblastom_E22965-08_3_RA3_01_4008.d/+MS2(540.7742), 29.4eV, 34.1min #9239	ZW_Neuroblastom_E22965-08_3_RA3_01_4008.d	SwissProt-human-oReAlk2019_Mascot_2019-10-14 16:08:34	Protein Search
662.365	-3.32744	1323.72	1323.73	47.1 (M.expect:0.0,M.score:47.1)	850 - 861	K.LDQVVESPAIPR.I	26756	ANK1_HUMAN	Ankyrin-1 OS=Homo sapiens OX=9606 GN=ANK1 PE=1 SV=3	1332		TRUE	5231	1322.72	662.367	1322.72	2	-0.00220398	-0.00440795	-3.32997	10.8793	0.0048648	20.4155	0.0149707	37.3064	1	1		1	20.9616	0				CID	/Neuroblastom-Imaging/Imaging-Sample1/ZW_Neuroblastom_E22965-08_3_RA3_01_4008.d/+MS2(662.3648), 33.0eV, 37.3min #10331	ZW_Neuroblastom_E22965-08_3_RA3_01_4008.d	SwissProt-human-oReAlk2019_Mascot_2019-10-14 16:08:34	Protein Search
833.936	-0.370531	1666.86	1666.86	37.2 (M.expect:0.0,M.score:37.2)	959 - 974	K.LSTPPPLAEEEGLASR.I	71864	ANK1_HUMAN	Ankyrin-1 OS=Homo sapiens OX=9606 GN=ANK1 PE=1 SV=3	2572		TRUE	8492	1665.86	833.936	1665.86	2	-0.000308999	-0.000617998	-0.370755	13.1429	0.00623524	30.2396	0.00935944	41.8372	1	1		1	35.5493	0				CID	/Neuroblastom-Imaging/Imaging-Sample1/ZW_Neuroblastom_E22965-08_3_RA3_01_4008.d/+MS2(833.9356), 46.7eV, 41.8min #11746	ZW_Neuroblastom_E22965-08_3_RA3_01_4008.d	SwissProt-human-oReAlk2019_Mascot_2019-10-14 16:08:34	Protein Search
665.87	-3.08195	1330.73	1330.74	46.2 (M.expect:0.0,M.score:46.2)	1,214 - 1,225	K.ATFSPIVTLEPR.R	14544	ANK2_HUMAN	Ankyrin-2 OS=Homo sapiens OX=9606 GN=ANK2 PE=1 SV=4	1367		TRUE	10522	1329.73	665.872	1329.73	2	-0.00205218	-0.00410436	-3.08429	8.26021	0.00488568	9.7994	0.00527474	48.7947	1	1		1	19.4244	0				CID	/Neuroblastom-Imaging/Imaging-Sample1/ZW_Neuroblastom_E22965-08_3_RA3_01_4008.d/+MS2(665.8699), 33.0eV, 48.8min #13705	ZW_Neuroblastom_E22965-08_3_RA3_01_4008.d	SwissProt-human-oReAlk2019_Mascot_2019-10-14 16:08:34	Protein Search
607.271	1.15838	1213.53	1213.53	34.7 (M.expect:0.0,M.score:34.7)	167 - 177	K.DITSDTSGDFR.N	223362	ANXA1_HUMAN	Annexin A1 OS=Homo sapiens OX=9606 GN=ANXA1 PE=1 SV=2	907		TRUE	5013	1212.53	607.27	1212.53	2	0.000703449	0.0014069	1.15934	2.40588	0.00131374	5.54392	0.00152843	30.26	1	1		1	24.2971	0				CID	/Neuroblastom-Imaging/Imaging-Sample1/ZW_Neuroblastom_E22965-08_3_RA3_01_4008.d/+MS2(607.2709), 33.0eV, 30.3min #7912	ZW_Neuroblastom_E22965-08_3_RA3_01_4008.d	SwissProt-human-oReAlk2019_Mascot_2019-10-14 16:08:34	Protein Search
694.387	-0.8814	1387.77	1387.77	48.7 (M.expect:0.0,M.score:48.7)	59 - 71	K.GVDEATIIDILTK.R	15118	ANXA1_HUMAN	Annexin A1 OS=Homo sapiens OX=9606 GN=ANXA1 PE=1 SV=2	1587		TRUE	15282	1386.76	694.388	1386.76	2	-0.000612033	-0.00122407	-0.88204	6.08694	0.00268505	6.76643	0.00322011	63.6716	5	1		1	24.7325	0				CID	/Neuroblastom-Imaging/Imaging-Sample1/ZW_Neuroblastom_E22965-08_3_RA3_01_4008.d/+MS2(694.3870), 33.0eV, 63.7min #17452	ZW_Neuroblastom_E22965-08_3_RA3_01_4008.d	SwissProt-human-oReAlk2019_Mascot_2019-10-14 16:08:34	Protein Search
694.387	-0.478167	1387.77	1387.77	20.0 (M.expect:0.0,M.score:20.0)	59 - 71	K.GVDEATIIDILTK.R	13982	ANXA1_HUMAN	Annexin A1 OS=Homo sapiens OX=9606 GN=ANXA1 PE=1 SV=2	1588		TRUE	15544	1386.76	694.388	1386.76	2	-0.000332033	-0.000664066	-0.478514	10.1113	0.00549553	11.4719	0.00799076	63.7034	5	1		1	20.2461	0				CID	/Neuroblastom-Imaging/Imaging-Sample1/ZW_Neuroblastom_E22965-08_3_RA3_01_4008.d/+MS2(694.3872), 33.0eV, 63.7min #17459	ZW_Neuroblastom_E22965-08_3_RA3_01_4008.d	SwissProt-human-oReAlk2019_Mascot_2019-10-14 16:08:34	Protein Search
694.387	-0.434963	1387.77	1387.77	45.3 (M.expect:0.0,M.score:45.3)	59 - 71	K.GVDEATIIDILTK.R	9408	ANXA1_HUMAN	Annexin A1 OS=Homo sapiens OX=9606 GN=ANXA1 PE=1 SV=2	1589		TRUE	15125	1386.76	694.388	1386.76	2	-0.000302033	-0.000604066	-0.435279	5.30357	0.00343131	5.48273	0.00425893	63.625	5	1		1	27.7375	0				CID	/Neuroblastom-Imaging/Imaging-Sample1/ZW_Neuroblastom_E22965-08_3_RA3_01_4008.d/+MS2(694.3873), 33.0eV, 63.6min #17444	ZW_Neuroblastom_E22965-08_3_RA3_01_4008.d	SwissProt-human-oReAlk2019_Mascot_2019-10-14 16:08:34	Protein Search
694.388	-0.0605325	1387.77	1387.77	20.1 (M.expect:0.0,M.score:20.1)	59 - 71	K.GVDEATIIDILTK.R	9380	ANXA1_HUMAN	Annexin A1 OS=Homo sapiens OX=9606 GN=ANXA1 PE=1 SV=2	1590		TRUE	15388	1386.76	694.388	1386.76	2	-4.2033e-05	-8.4066e-05	-0.0605764	7.25394	0.00671968	22.6085	0.0107368	63.6007	5	1		1	16.839	0				CID	/Neuroblastom-Imaging/Imaging-Sample1/ZW_Neuroblastom_E22965-08_3_RA3_01_4008.d/+MS2(694.3875), 33.0eV, 63.6min #17436	ZW_Neuroblastom_E22965-08_3_RA3_01_4008.d	SwissProt-human-oReAlk2019_Mascot_2019-10-14 16:08:34	Protein Search
694.388	0.45791	1387.77	1387.77	20.9 (M.expect:0.0,M.score:20.9)	59 - 71	K.GVDEATIIDILTK.R	10584	ANXA1_HUMAN	Annexin A1 OS=Homo sapiens OX=9606 GN=ANXA1 PE=1 SV=2	1591		TRUE	15863	1386.76	694.388	1386.76	2	0.000317967	0.000635934	0.458242	5.22275	0.00340385	8.07477	0.00615643	63.7532	5	1		1	13.1564	0				CID	/Neuroblastom-Imaging/Imaging-Sample1/ZW_Neuroblastom_E22965-08_3_RA3_01_4008.d/+MS2(694.3879), 33.0eV, 63.8min #17470	ZW_Neuroblastom_E22965-08_3_RA3_01_4008.d	SwissProt-human-oReAlk2019_Mascot_2019-10-14 16:08:34	Protein Search
775.911	-1.18176	1550.82	1550.82	40.6 (M.expect:0.0,M.score:40.6)	215 - 228	K.GTDVNVFNTILTTR.S	102966	ANXA1_HUMAN	Annexin A1 OS=Homo sapiens OX=9606 GN=ANXA1 PE=1 SV=2	2112		TRUE	13759	1549.81	775.912	1549.81	2	-0.000916937	-0.00183387	-1.18252	7.05646	0.00601885	11.1669	0.00714878	55.2769	4	1		1	20.0392	0				CID	/Neuroblastom-Imaging/Imaging-Sample1/ZW_Neuroblastom_E22965-08_3_RA3_01_4008.d/+MS2(775.9114), 42.1eV, 55.3min #15438	ZW_Neuroblastom_E22965-08_3_RA3_01_4008.d	SwissProt-human-oReAlk2019_Mascot_2019-10-14 16:08:34	Protein Search
775.912	-0.885329	1550.82	1550.82	34.1 (M.expect:0.0,M.score:34.1)	215 - 228	K.GTDVNVFNTILTTR.S	33026	ANXA1_HUMAN	Annexin A1 OS=Homo sapiens OX=9606 GN=ANXA1 PE=1 SV=2	2113		TRUE	11075	1549.81	775.912	1549.81	2	-0.000686937	-0.00137387	-0.885904	14.1409	0.00604516	16.5464	0.0115666	55.3868	4	1		1	13.8909	0				CID	/Neuroblastom-Imaging/Imaging-Sample1/ZW_Neuroblastom_E22965-08_3_RA3_01_4008.d/+MS2(775.9116), 42.1eV, 55.4min #15467	ZW_Neuroblastom_E22965-08_3_RA3_01_4008.d	SwissProt-human-oReAlk2019_Mascot_2019-10-14 16:08:34	Protein Search
775.912	-0.228038	1550.82	1550.82	60.8 (M.expect:0.0,M.score:60.8)	215 - 228	K.GTDVNVFNTILTTR.S	69798	ANXA1_HUMAN	Annexin A1 OS=Homo sapiens OX=9606 GN=ANXA1 PE=1 SV=2	2114		TRUE	10749	1549.81	775.912	1549.81	2	-0.000176937	-0.000353875	-0.228186	6.10939	0.00362188	8.20637	0.00635968	55.2162	4	1		1	32.459	0				CID	/Neuroblastom-Imaging/Imaging-Sample1/ZW_Neuroblastom_E22965-08_3_RA3_01_4008.d/+MS2(775.9121), 42.1eV, 55.2min #15419	ZW_Neuroblastom_E22965-08_3_RA3_01_4008.d	SwissProt-human-oReAlk2019_Mascot_2019-10-14 16:08:34	Protein Search
775.912	-0.124933	1550.82	1550.82	51.6 (M.expect:0.0,M.score:51.6)	215 - 228	K.GTDVNVFNTILTTR.S	19010	ANXA1_HUMAN	Annexin A1 OS=Homo sapiens OX=9606 GN=ANXA1 PE=1 SV=2	2115		TRUE	12980	1549.81	775.912	1549.81	2	-9.69373e-05	-0.000193875	-0.125014	8.48538	0.0047702	10.4155	0.00997396	55.1651	4	1		1	21.5032	0				CID	/Neuroblastom-Imaging/Imaging-Sample1/ZW_Neuroblastom_E22965-08_3_RA3_01_4008.d/+MS2(775.9122), 42.2eV, 55.2min #15404	ZW_Neuroblastom_E22965-08_3_RA3_01_4008.d	SwissProt-human-oReAlk2019_Mascot_2019-10-14 16:08:34	Protein Search
560.309	-0.0138879	1678.91	1678.91	42.4 (M.expect:0.0,M.score:42.4)	214 - 228	R.KGTDVNVFNTILTTR.S	101144	ANXA1_HUMAN	Annexin A1 OS=Homo sapiens OX=9606 GN=ANXA1 PE=1 SV=2	2599		TRUE	11632	1677.9	560.309	1677.9	3	-7.78149e-06	-2.33445e-05	-0.0139045	4.59795	0.00336092	5.22852	0.00408363	45.4063	1	1		1	32.5063	1				CID	/Neuroblastom-Imaging/Imaging-Sample1/ZW_Neuroblastom_E22965-08_3_RA3_01_4008.d/+MS2(560.3089), 26.2eV, 45.4min #12756	ZW_Neuroblastom_E22965-08_3_RA3_01_4008.d	SwissProt-human-oReAlk2019_Mascot_2019-10-14 16:08:34	Protein Search
675.347	-1.10953	2024.03	2024.03	15.1 (M.expect:0.0,M.score:15.1)	167 - 185	K.DITSDTSGDFRNALLSLAK.G	11582	ANXA1_HUMAN	Annexin A1 OS=Homo sapiens OX=9606 GN=ANXA1 PE=1 SV=2	3454		TRUE	13229	2023.02	675.348	2023.02	3	-0.000749316	-0.00224795	-1.11063	6.11187	0.00444789	6.11187	0.00444789	59.208	2	1		1	23.6112	1				CID	/Neuroblastom-Imaging/Imaging-Sample1/ZW_Neuroblastom_E22965-08_3_RA3_01_4008.d/+MS2(675.3473), 27.0eV, 59.2min #16441	ZW_Neuroblastom_E22965-08_3_RA3_01_4008.d	SwissProt-human-oReAlk2019_Mascot_2019-10-14 16:08:34	Protein Search
675.348	0.504457	2024.03	2024.03	28.5 (M.expect:0.0,M.score:28.5)	167 - 185	K.DITSDTSGDFRNALLSLAK.G	18038	ANXA1_HUMAN	Annexin A1 OS=Homo sapiens OX=9606 GN=ANXA1 PE=1 SV=2	3455		TRUE	13383	2023.02	675.348	2023.02	3	0.000340684	0.00102205	0.504959	3.47158	0.00201507	5.30969	0.00373761	59.2774	2	1		1	26.4955	1				CID	/Neuroblastom-Imaging/Imaging-Sample1/ZW_Neuroblastom_E22965-08_3_RA3_01_4008.d/+MS2(675.3484), 27.0eV, 59.3min #16463	ZW_Neuroblastom_E22965-08_3_RA3_01_4008.d	SwissProt-human-oReAlk2019_Mascot_2019-10-14 16:08:34	Protein Search
531.277	-1.00381	1061.55	1061.55	34.4 (M.expect:0.0,M.score:34.4)	462 - 470	R.SETDLLDIR.S	42850	ANX11_HUMAN	Annexin A11 OS=Homo sapiens OX=9606 GN=ANXA11 PE=1 SV=1	477		TRUE	7465	1060.54	531.277	1060.54	2	-0.000533302	-0.0010666	-1.00476	7.14321	0.00183731	10.3526	0.00303932	41.1743	1	1		1	16.1969	0				CID	/Neuroblastom-Imaging/Imaging-Sample1/ZW_Neuroblastom_E22965-08_3_RA3_01_4008.d/+MS2(531.2768), 28.9eV, 41.2min #11554	ZW_Neuroblastom_E22965-08_3_RA3_01_4008.d	SwissProt-human-oReAlk2019_Mascot_2019-10-14 16:08:34	Protein Search
680.349	0.0275984	1359.69	1359.69	42.9 (M.expect:0.0,M.score:42.9)	192 - 204	R.GTITDAPGFDPLR.D	17648	ANX11_HUMAN	Annexin A11 OS=Homo sapiens OX=9606 GN=ANXA11 PE=1 SV=1	1476		TRUE	9151	1358.68	680.349	1358.68	2	1.87765e-05	3.7553e-05	0.0276188	18.395	0.00685365	32.6528	0.00973182	45.5208	2	1		1	22.1815	0				CID	/Neuroblastom-Imaging/Imaging-Sample1/ZW_Neuroblastom_E22965-08_3_RA3_01_4008.d/+MS2(680.3488), 33.0eV, 45.5min #12790	ZW_Neuroblastom_E22965-08_3_RA3_01_4008.d	SwissProt-human-oReAlk2019_Mascot_2019-10-14 16:08:34	Protein Search
680.349	0.159883	1359.69	1359.69	32.5 (M.expect:0.0,M.score:32.5)	192 - 204	R.GTITDAPGFDPLR.D	59948	ANX11_HUMAN	Annexin A11 OS=Homo sapiens OX=9606 GN=ANXA11 PE=1 SV=1	1477		TRUE	9211	1358.68	680.349	1358.68	2	0.000108777	0.000217553	0.160002	4.68289	0.00233909	12.585	0.0128149	45.6103	2	1		1	25.7448	0				CID	/Neuroblastom-Imaging/Imaging-Sample1/ZW_Neuroblastom_E22965-08_3_RA3_01_4008.d/+MS2(680.3489), 33.0eV, 45.6min #12811	ZW_Neuroblastom_E22965-08_3_RA3_01_4008.d	SwissProt-human-oReAlk2019_Mascot_2019-10-14 16:08:34	Protein Search
373.236	1.13244	745.465	745.464	20.2 (M.expect:0.0,M.score:20.2)	170 - 176	K.LMVALAK.G	65516	ANXA2_HUMAN	Annexin A2 OS=Homo sapiens OX=9606 GN=ANXA2 PE=1 SV=2	16		TRUE	13466	744.458	373.236	744.457	2	0.000422666	0.000845333	1.13397	8.55757	0.00342465	10.3657	0.00361371	30.0002	1	1		1	22.4207	0				CID	/Neuroblastom-Imaging/Imaging-Sample1/ZW_Neuroblastom_E22965-08_3_RA3_01_4008.d/+MS2(373.2361), 23.0eV, 30.0min #7825	ZW_Neuroblastom_E22965-08_3_RA3_01_4008.d	SwissProt-human-oReAlk2019_Mascot_2019-10-14 16:08:34	Protein Search
556.281	1.3656	1111.55	1111.55	29.2 (M.expect:0.0,M.score:29.2)	69 - 77	R.QDIAFAYQR.R	120666	ANXA2_HUMAN	Annexin A2 OS=Homo sapiens OX=9606 GN=ANXA2 PE=1 SV=2	595		TRUE	6647	1110.55	556.28	1110.55	2	0.000759658	0.00151932	1.36684	7.91888	0.0049177	19.3379	0.00896718	32.1425	1	1		1	27.7229	0				CID	/Neuroblastom-Imaging/Imaging-Sample1/ZW_Neuroblastom_E22965-08_3_RA3_01_4008.d/+MS2(556.2809), 30.4eV, 32.1min #8580	ZW_Neuroblastom_E22965-08_3_RA3_01_4008.d	SwissProt-human-oReAlk2019_Mascot_2019-10-14 16:08:34	Protein Search
613.289	0.96316	1225.57	1225.57	19.3 (M.expect:0.0,M.score:19.3)	158 - 168	K.DIISDTSGDFR.K	61714	ANXA2_HUMAN	Annexin A2 OS=Homo sapiens OX=9606 GN=ANXA2 PE=1 SV=2	939		TRUE	6330	1224.56	613.288	1224.56	2	0.000590695	0.00118139	0.963952	3.51018	0.00152142	4.58985	0.00292651	41.5277	1	1		1	21.2084	0				CID	/Neuroblastom-Imaging/Imaging-Sample1/ZW_Neuroblastom_E22965-08_3_RA3_01_4008.d/+MS2(613.2890), 33.0eV, 41.5min #11655	ZW_Neuroblastom_E22965-08_3_RA3_01_4008.d	SwissProt-human-oReAlk2019_Mascot_2019-10-14 16:08:34	Protein Search
451.895	3.42404	1353.67	1353.66	16.6 (M.expect:0.0,M.score:16.6)	158 - 169	K.DIISDTSGDFRK.L	37006	ANXA2_HUMAN	Annexin A2 OS=Homo sapiens OX=9606 GN=ANXA2 PE=1 SV=2	1438		TRUE	9181	1352.66	451.893	1352.66	3	0.00154731	0.00464192	3.42914	6.13671	0.00308424	6.94136	0.00466622	32.0471	1	1		1	9.96451	1				CID	/Neuroblastom-Imaging/Imaging-Sample1/ZW_Neuroblastom_E22965-08_3_RA3_01_4008.d/+MS2(451.8946), 24.0eV, 32.1min #8546	ZW_Neuroblastom_E22965-08_3_RA3_01_4008.d	SwissProt-human-oReAlk2019_Mascot_2019-10-14 16:08:34	Protein Search
730.84	0.462842	1460.67	1460.67	18.7 (M.expect:0.0,M.score:18.7)	234 - 245	K.SYSPYDMLESIR.K	14240	ANXA2_HUMAN	Annexin A2 OS=Homo sapiens OX=9606 GN=ANXA2 PE=1 SV=2	1789		TRUE	12855	1459.67	730.84	1459.67	2	0.000338264	0.000676528	0.463162	4.04088	0.00279558	8.69516	0.00984824	54.2917	1	1		1	13.4206	0				CID	/Neuroblastom-Imaging/Imaging-Sample1/ZW_Neuroblastom_E22965-08_3_RA3_01_4008.d/+MS2(730.8403), 36.8eV, 54.3min #15168	ZW_Neuroblastom_E22965-08_3_RA3_01_4008.d	SwissProt-human-oReAlk2019_Mascot_2019-10-14 16:08:34	Protein Search
636.966	-0.10205	1908.88	1908.88	32.5 (M.expect:0.0,M.score:32.5)	180 - 196	R.AEDGSVIDYELIDQDAR.D	30938	ANXA2_HUMAN	Annexin A2 OS=Homo sapiens OX=9606 GN=ANXA2 PE=1 SV=2	3169		TRUE	8965	1907.87	636.966	1907.87	3	-6.50025e-05	-0.000195008	-0.102158	6.39551	0.00598462	8.07687	0.00763802	50.264	3	1		1	29.9099	0				CID	/Neuroblastom-Imaging/Imaging-Sample1/ZW_Neuroblastom_E22965-08_3_RA3_01_4008.d/+MS2(636.9655), 27.0eV, 50.3min #14097	ZW_Neuroblastom_E22965-08_3_RA3_01_4008.d	SwissProt-human-oReAlk2019_Mascot_2019-10-14 16:08:34	Protein Search
954.944	-0.428588	1908.88	1908.88	79.8 (M.expect:0.0,M.score:79.8)	180 - 196	R.AEDGSVIDYELIDQDAR.D	87384	ANXA2_HUMAN	Annexin A2 OS=Homo sapiens OX=9606 GN=ANXA2 PE=1 SV=2	3170		TRUE	8790	1907.87	954.945	1907.87	2	-0.000409278	-0.000818555	-0.428814	4.14385	0.00330217	7.86371	0.00611333	50.2608	3	1		1	19.1791	0				CID	/Neuroblastom-Imaging/Imaging-Sample1/ZW_Neuroblastom_E22965-08_3_RA3_01_4008.d/+MS2(954.9443), 52.8eV, 50.3min #14095	ZW_Neuroblastom_E22965-08_3_RA3_01_4008.d	SwissProt-human-oReAlk2019_Mascot_2019-10-14 16:08:34	Protein Search
954.944	-0.250567	1908.88	1908.88	39.4 (M.expect:0.0,M.score:39.4)	180 - 196	R.AEDGSVIDYELIDQDAR.D	57892	ANXA2_HUMAN	Annexin A2 OS=Homo sapiens OX=9606 GN=ANXA2 PE=1 SV=2	3171		TRUE	6499	1907.87	954.945	1907.87	2	-0.000239278	-0.000478555	-0.250699	7.98624	0.00605628	9.93242	0.00676772	52.0148	3	1		1	10.3754	0				CID	/Neuroblastom-Imaging/Imaging-Sample1/ZW_Neuroblastom_E22965-08_3_RA3_01_4008.d/+MS2(954.9445), 52.8eV, 52.0min #14554	ZW_Neuroblastom_E22965-08_3_RA3_01_4008.d	SwissProt-human-oReAlk2019_Mascot_2019-10-14 16:08:34	Protein Search
689	0.509901	2064.98	2064.98	54.6 (M.expect:0.0,M.score:54.6)	179 - 196	R.RAEDGSVIDYELIDQDAR.D	185730	ANXA2_HUMAN	Annexin A2 OS=Homo sapiens OX=9606 GN=ANXA2 PE=1 SV=2	3506		TRUE	6159	2063.98	688.999	2063.98	3	0.000351321	0.00105396	0.510398	2.92187	0.00261849	3.32704	0.00309086	42.4935	1	1		1	42.5654	1				CID	/Neuroblastom-Imaging/Imaging-Sample1/ZW_Neuroblastom_E22965-08_3_RA3_01_4008.d/+MS2(688.9996), 27.0eV, 42.5min #11932	ZW_Neuroblastom_E22965-08_3_RA3_01_4008.d	SwissProt-human-oReAlk2019_Mascot_2019-10-14 16:08:34	Protein Search
791.368	-2.76608	1581.73	1581.73	29.3 (M.expect:0.0,M.score:29.3)	10 - 24	K.AASGFNAMEDAQTLR.K	26502	ANXA4_HUMAN	Annexin A4 OS=Homo sapiens OX=9606 GN=ANXA4 PE=1 SV=4	2221		TRUE	8673	1580.72	791.37	1580.73	2	-0.00218898	-0.00437797	-2.76784	15.1701	0.0137276	49.1869	0.0189013	36.9492	1	1		1	13.0225	0				CID	/Neuroblastom-Imaging/Imaging-Sample1/ZW_Neuroblastom_E22965-08_3_RA3_01_4008.d/+MS2(791.3677), 44.0eV, 37.0min #10218	ZW_Neuroblastom_E22965-08_3_RA3_01_4008.d	SwissProt-human-oReAlk2019_Mascot_2019-10-14 16:08:34	Protein Search
553.796	0.427539	1106.58	1106.58	14.4 (M.expect:0.0,M.score:14.4)	277 - 285	R.SEIDLFNIR.K	28290	ANXA5_HUMAN	Annexin A5 OS=Homo sapiens OX=9606 GN=ANXA5 PE=1 SV=2	578		TRUE	11183	1105.58	553.796	1105.58	2	0.000236769	0.000473539	0.427928	2.94345	0.00105073	5.11957	0.00144474	50.8785	2	1		1	23.5409	0				CID	/Neuroblastom-Imaging/Imaging-Sample1/ZW_Neuroblastom_E22965-08_3_RA3_01_4008.d/+MS2(553.7959), 30.2eV, 50.9min #14259	ZW_Neuroblastom_E22965-08_3_RA3_01_4008.d	SwissProt-human-oReAlk2019_Mascot_2019-10-14 16:08:34	Protein Search
553.8	7.12671	1106.59	1106.58	19.8 (M.expect:0.0,M.score:19.8)	277 - 285	R.SEIDLFNIR.K	17996	ANXA5_HUMAN	Annexin A5 OS=Homo sapiens OX=9606 GN=ANXA5 PE=1 SV=2	579		TRUE	10233	1105.58	553.796	1105.58	2	0.00394677	0.00789354	7.1332	3.12266	0.00167794	3.40885	0.00183652	50.7363	2	1		1	29.5939	0				CID	/Neuroblastom-Imaging/Imaging-Sample1/ZW_Neuroblastom_E22965-08_3_RA3_01_4008.d/+MS2(553.7996), 30.2eV, 50.8min #14227	ZW_Neuroblastom_E22965-08_3_RA3_01_4008.d	SwissProt-human-oReAlk2019_Mascot_2019-10-14 16:08:34	Protein Search
670.809	-0.0877857	1340.61	1340.61	19.4 (M.expect:0.0,M.score:19.4)	7 - 18	R.GTVTDFPGFDER.A	979340	ANXA5_HUMAN	Annexin A5 OS=Homo sapiens OX=9606 GN=ANXA5 PE=1 SV=2	1393		TRUE	3169	1339.6	670.809	1339.6	2	-5.88875e-05	-0.000117775	-0.0878517	5.38322	0.0019672	12.5406	0.00574318	42.6592	3	1		1	13.1376	0				CID	/Neuroblastom-Imaging/Imaging-Sample1/ZW_Neuroblastom_E22965-08_3_RA3_01_4008.d/+MS2(670.8094), 33.0eV, 42.7min #11990	ZW_Neuroblastom_E22965-08_3_RA3_01_4008.d	SwissProt-human-oReAlk2019_Mascot_2019-10-14 16:08:34	Protein Search
670.809	-0.0877857	1340.61	1340.61	68.2 (M.expect:0.0,M.score:68.2)	7 - 18	R.GTVTDFPGFDER.A	979340	ANXA5_HUMAN	Annexin A5 OS=Homo sapiens OX=9606 GN=ANXA5 PE=1 SV=2	1394		TRUE	899	1339.6	670.809	1339.6	2	-5.88875e-05	-0.000117775	-0.0878517	1.97921	0.000923841	2.24559	0.00107191	42.6472	3	1		1	56.344	0				CID	/Neuroblastom-Imaging/Imaging-Sample1/ZW_Neuroblastom_E22965-08_3_RA3_01_4008.d/+MS2(670.8094), 33.0eV, 42.6min #11981	ZW_Neuroblastom_E22965-08_3_RA3_01_4008.d	SwissProt-human-oReAlk2019_Mascot_2019-10-14 16:08:34	Protein Search
670.81	0.821563	1340.61	1340.61	48.1 (M.expect:0.0,M.score:48.1)	7 - 18	R.GTVTDFPGFDER.A	289604	ANXA5_HUMAN	Annexin A5 OS=Homo sapiens OX=9606 GN=ANXA5 PE=1 SV=2	1395		TRUE	5404	1339.61	670.809	1339.6	2	0.000551113	0.00110223	0.82218	3.77817	0.0027112	5.29083	0.00419532	42.5968	3	1		1	46.0104	0				CID	/Neuroblastom-Imaging/Imaging-Sample1/ZW_Neuroblastom_E22965-08_3_RA3_01_4008.d/+MS2(670.8101), 33.0eV, 42.6min #11965	ZW_Neuroblastom_E22965-08_3_RA3_01_4008.d	SwissProt-human-oReAlk2019_Mascot_2019-10-14 16:08:34	Protein Search
852.953	-1.3702	1704.9	1704.9	24.9 (M.expect:0.0,M.score:24.9)	30 - 45	K.GLGTDEESILTLLTSR.S	7194	ANXA5_HUMAN	Annexin A5 OS=Homo sapiens OX=9606 GN=ANXA5 PE=1 SV=2	2696		TRUE	16263	1703.89	852.954	1703.89	2	-0.00116872	-0.00233743	-1.37101	14.7741	0.0137621	56.5155	0.0191498	67.4642	3	1		1	19.3858	0				CID	/Neuroblastom-Imaging/Imaging-Sample1/ZW_Neuroblastom_E22965-08_3_RA3_01_4008.d/+MS2(852.9532), 47.6eV, 67.5min #18218	ZW_Neuroblastom_E22965-08_3_RA3_01_4008.d	SwissProt-human-oReAlk2019_Mascot_2019-10-14 16:08:34	Protein Search
852.954	0.165639	1704.9	1704.9	34.2 (M.expect:0.0,M.score:34.2)	30 - 45	K.GLGTDEESILTLLTSR.S	9050	ANXA5_HUMAN	Annexin A5 OS=Homo sapiens OX=9606 GN=ANXA5 PE=1 SV=2	2697		TRUE	16037	1703.89	852.954	1703.89	2	0.000141283	0.000282566	0.165737	4.65551	0.00240964	6.90186	0.00286771	67.4066	3	1		1	20.2416	0				CID	/Neuroblastom-Imaging/Imaging-Sample1/ZW_Neuroblastom_E22965-08_3_RA3_01_4008.d/+MS2(852.9545), 47.6eV, 67.4min #18207	ZW_Neuroblastom_E22965-08_3_RA3_01_4008.d	SwissProt-human-oReAlk2019_Mascot_2019-10-14 16:08:34	Protein Search
852.956	1.74837	1704.9	1704.9	32.9 (M.expect:0.0,M.score:32.9)	30 - 45	K.GLGTDEESILTLLTSR.S	7994	ANXA5_HUMAN	Annexin A5 OS=Homo sapiens OX=9606 GN=ANXA5 PE=1 SV=2	2698		TRUE	16106	1703.9	852.954	1703.89	2	0.00149128	0.00298257	1.7494	7.18992	0.00742328	10.0942	0.0109887	67.4287	3	1		1	15.6087	0				CID	/Neuroblastom-Imaging/Imaging-Sample1/ZW_Neuroblastom_E22965-08_3_RA3_01_4008.d/+MS2(852.9558), 47.6eV, 67.4min #18211	ZW_Neuroblastom_E22965-08_3_RA3_01_4008.d	SwissProt-human-oReAlk2019_Mascot_2019-10-14 16:08:34	Protein Search
576.326	-3.59069	1726.96	1726.97	23.8 (M.expect:0.0,M.score:23.8)	109 - 123	K.VLTEIIASRTPEELR.A	21762	ANXA5_HUMAN	Annexin A5 OS=Homo sapiens OX=9606 GN=ANXA5 PE=1 SV=2	2782		TRUE	6141	1725.96	576.328	1725.96	3	-0.00206941	-0.00620822	-3.59488	9.14519	0.00862865	15.5909	0.0116816	39.9969	1	1		1	13.0601	1				CID	/Neuroblastom-Imaging/Imaging-Sample1/ZW_Neuroblastom_E22965-08_3_RA3_01_4008.d/+MS2(576.3260), 26.5eV, 40.0min #11191	ZW_Neuroblastom_E22965-08_3_RA3_01_4008.d	SwissProt-human-oReAlk2019_Mascot_2019-10-14 16:08:34	Protein Search
699.668	0.470979	2096.99	2096.99	34.9 (M.expect:0.0,M.score:34.9)	7 - 25	R.GTVTDFPGFDERADAETLR.K	175274	ANXA5_HUMAN	Annexin A5 OS=Homo sapiens OX=9606 GN=ANXA5 PE=1 SV=2	3584		TRUE	6189	2095.98	699.668	2095.98	3	0.000329529	0.000988586	0.471431	3.80698	0.00334009	5.61107	0.00436555	43.9832	1	1		1	45.4912	1				CID	/Neuroblastom-Imaging/Imaging-Sample1/ZW_Neuroblastom_E22965-08_3_RA3_01_4008.d/+MS2(699.6680), 27.0eV, 44.0min #12370	ZW_Neuroblastom_E22965-08_3_RA3_01_4008.d	SwissProt-human-oReAlk2019_Mascot_2019-10-14 16:08:34	Protein Search
590.308	0.264327	1768.91	1768.91	32.7 (M.expect:0.0,M.score:32.7)	378 - 393	K.GLGTDEDTIIDIITHR.S	12582	ANXA6_HUMAN	Annexin A6 OS=Homo sapiens OX=9606 GN=ANXA6 PE=1 SV=3	2913		TRUE	14131	1767.9	590.307	1767.9	3	0.000156034	0.000468103	0.264628	15.5303	0.0076382	22.4471	0.00907641	57.9886	2	1		1	15.5506	0				CID	/Neuroblastom-Imaging/Imaging-Sample1/ZW_Neuroblastom_E22965-08_3_RA3_01_4008.d/+MS2(590.3075), 26.8eV, 58.0min #16140	ZW_Neuroblastom_E22965-08_3_RA3_01_4008.d	SwissProt-human-oReAlk2019_Mascot_2019-10-14 16:08:34	Protein Search
590.308	0.941939	1768.91	1768.91	21.4 (M.expect:0.0,M.score:21.4)	378 - 393	K.GLGTDEDTIIDIITHR.S	22414	ANXA6_HUMAN	Annexin A6 OS=Homo sapiens OX=9606 GN=ANXA6 PE=1 SV=3	2914		TRUE	13157	1767.9	590.307	1767.9	3	0.000556034	0.0016681	0.943012	8.11142	0.00540264	9.84311	0.00739051	58.0571	2	1		1	18.1508	0				CID	/Neuroblastom-Imaging/Imaging-Sample1/ZW_Neuroblastom_E22965-08_3_RA3_01_4008.d/+MS2(590.3079), 26.8eV, 58.1min #16161	ZW_Neuroblastom_E22965-08_3_RA3_01_4008.d	SwissProt-human-oReAlk2019_Mascot_2019-10-14 16:08:34	Protein Search
690.388	-0.580449	2069.15	2069.15	28.3 (M.expect:0.0,M.score:28.3)	372 - 391	K.AGQTQPNPGILPIQPALTPR.K	21632	AAK1_HUMAN	AP2-associated protein kinase 1 OS=Homo sapiens OX=9606 GN=AAK1 PE=1 SV=3	3510		TRUE	9877	2068.14	690.388	2068.14	3	-0.000400735	-0.0012022	-0.581014	7.98278	0.00318132	10.815	0.00529009	52.4121	1	1		1	23.088	0				CID	/Neuroblastom-Imaging/Imaging-Sample1/ZW_Neuroblastom_E22965-08_3_RA3_01_4008.d/+MS2(690.3878), 27.0eV, 52.4min #14659	ZW_Neuroblastom_E22965-08_3_RA3_01_4008.d	SwissProt-human-oReAlk2019_Mascot_2019-10-14 16:08:34	Protein Search
516.263	-1.12672	1031.52	1031.52	26.2 (M.expect:0.0,M.score:26.2)	165 - 173	K.LSPLGEEMR.D	81308	APOA1_HUMAN	Apolipoprotein A-I OS=Homo sapiens OX=9606 GN=APOA1 PE=1 SV=1	400		TRUE	4620	1030.51	516.263	1030.51	2	-0.000581682	-0.00116336	-1.12782	9.44373	0.00304809	20.056	0.0105295	30.1563	2	1		1	17.3573	0				CID	/Neuroblastom-Imaging/Imaging-Sample1/ZW_Neuroblastom_E22965-08_3_RA3_01_4008.d/+MS2(516.2626), 28.0eV, 30.2min #7875	ZW_Neuroblastom_E22965-08_3_RA3_01_4008.d	SwissProt-human-oReAlk2019_Mascot_2019-10-14 16:08:34	Protein Search
516.264	1.29453	1031.52	1031.52	29.9 (M.expect:0.0,M.score:29.9)	165 - 173	K.LSPLGEEMR.D	358198	APOA1_HUMAN	Apolipoprotein A-I OS=Homo sapiens OX=9606 GN=APOA1 PE=1 SV=1	401		TRUE	4976	1030.51	516.263	1030.51	2	0.000668318	0.00133664	1.29579	3.00864	0.000924757	4.38004	0.00132327	30.2085	2	1		1	46.156	0				CID	/Neuroblastom-Imaging/Imaging-Sample1/ZW_Neuroblastom_E22965-08_3_RA3_01_4008.d/+MS2(516.2638), 28.0eV, 30.2min #7893	ZW_Neuroblastom_E22965-08_3_RA3_01_4008.d	SwissProt-human-oReAlk2019_Mascot_2019-10-14 16:08:34	Protein Search
524.263	4.80831	1047.52	1047.51	27.9 (M.expect:0.0,M.score:27.9)	165 - 173	K.LSPLGEEMR.D	218664	APOA1_HUMAN	Apolipoprotein A-I OS=Homo sapiens OX=9606 GN=APOA1 PE=1 SV=1	447		TRUE	4385	1046.51	524.261	1046.51	2	0.00252082	0.00504164	4.81293	8.17954	0.00356885	15.2564	0.0127526	23.6225	1	1		1	18.9103	0	Oxidation: 8			CID	/Neuroblastom-Imaging/Imaging-Sample1/ZW_Neuroblastom_E22965-08_3_RA3_01_4008.d/+MS2(524.2631), 28.5eV, 23.6min #5532	ZW_Neuroblastom_E22965-08_3_RA3_01_4008.d	SwissProt-human-oReAlk2019_Mascot_2019-10-14 16:08:34	Protein Search
618.346	-3.03809	1235.68	1235.69	28.0 (M.expect:0.0,M.score:28.0)	37 - 47	K.DLATVYVDVLK.D	9114	APOA1_HUMAN	Apolipoprotein A-I OS=Homo sapiens OX=9606 GN=APOA1 PE=1 SV=1	990		TRUE	13357	1234.68	618.348	1234.68	2	-0.00187859	-0.00375718	-3.04057	4.11429	0.00229224	4.99417	0.00281798	58.5043	3	1		1	19.602	0				CID	/Neuroblastom-Imaging/Imaging-Sample1/ZW_Neuroblastom_E22965-08_3_RA3_01_4008.d/+MS2(618.3458), 33.0eV, 58.5min #16265	ZW_Neuroblastom_E22965-08_3_RA3_01_4008.d	SwissProt-human-oReAlk2019_Mascot_2019-10-14 16:08:34	Protein Search
618.347	-1.00039	1235.69	1235.69	16.2 (M.expect:0.0,M.score:16.2)	37 - 47	K.DLATVYVDVLK.D	19484	APOA1_HUMAN	Apolipoprotein A-I OS=Homo sapiens OX=9606 GN=APOA1 PE=1 SV=1	991		TRUE	13671	1234.68	618.348	1234.68	2	-0.000618591	-0.00123718	-1.00121	7.3328	0.00290931	9.08635	0.00647202	58.5613	3	1		1	20.9726	0				CID	/Neuroblastom-Imaging/Imaging-Sample1/ZW_Neuroblastom_E22965-08_3_RA3_01_4008.d/+MS2(618.3471), 33.0eV, 58.6min #16280	ZW_Neuroblastom_E22965-08_3_RA3_01_4008.d	SwissProt-human-oReAlk2019_Mascot_2019-10-14 16:08:34	Protein Search
618.347	-0.838673	1235.69	1235.69	18.8 (M.expect:0.0,M.score:18.8)	37 - 47	K.DLATVYVDVLK.D	19022	APOA1_HUMAN	Apolipoprotein A-I OS=Homo sapiens OX=9606 GN=APOA1 PE=1 SV=1	992		TRUE	14152	1234.68	618.348	1234.68	2	-0.000518591	-0.00103718	-0.839356	9.32014	0.00669684	14.7081	0.0127097	58.6124	3	1		1	16.2003	0				CID	/Neuroblastom-Imaging/Imaging-Sample1/ZW_Neuroblastom_E22965-08_3_RA3_01_4008.d/+MS2(618.3472), 33.0eV, 58.6min #16292	ZW_Neuroblastom_E22965-08_3_RA3_01_4008.d	SwissProt-human-oReAlk2019_Mascot_2019-10-14 16:08:34	Protein Search
642.292	3.66228	1283.58	1283.57	26.2 (M.expect:0.0,M.score:26.2)	132 - 140	K.WQEEMELYR.Q	32714	APOA1_HUMAN	Apolipoprotein A-I OS=Homo sapiens OX=9606 GN=APOA1 PE=1 SV=1	1178		TRUE	4399	1282.57	642.29	1282.57	2	0.00235225	0.0047045	3.66515	5.73478	0.00272571	10.1647	0.00465899	38.1846	1	1		1	13.4624	0				CID	/Neuroblastom-Imaging/Imaging-Sample1/ZW_Neuroblastom_E22965-08_3_RA3_01_4008.d/+MS2(642.2922), 33.0eV, 38.2min #10621	ZW_Neuroblastom_E22965-08_3_RA3_01_4008.d	SwissProt-human-oReAlk2019_Mascot_2019-10-14 16:08:34	Protein Search
700.838	-0.665385	1400.67	1400.67	38.5 (M.expect:0.0,M.score:38.5)	52 - 64	R.DYVSQFEGSALGK.Q	88958	APOA1_HUMAN	Apolipoprotein A-I OS=Homo sapiens OX=9606 GN=APOA1 PE=1 SV=1	1636		TRUE	10226	1399.66	700.838	1399.66	2	-0.000466327	-0.000932654	-0.665863	6.56501	0.00406792	8.17985	0.00498129	46.4734	1	1		1	30.049	0				CID	/Neuroblastom-Imaging/Imaging-Sample1/ZW_Neuroblastom_E22965-08_3_RA3_01_4008.d/+MS2(700.8378), 33.1eV, 46.5min #13056	ZW_Neuroblastom_E22965-08_3_RA3_01_4008.d	SwissProt-human-oReAlk2019_Mascot_2019-10-14 16:08:34	Protein Search
806.897	0.269524	1612.79	1612.79	62.2 (M.expect:0.0,M.score:62.2)	70 - 83	K.LLDNWDSVTSTFSK.L	63358	APOA1_HUMAN	Apolipoprotein A-I OS=Homo sapiens OX=9606 GN=APOA1 PE=1 SV=1	2343		TRUE	11851	1611.78	806.896	1611.78	2	0.000217478	0.000434956	0.269692	7.96552	0.00369153	8.79906	0.0040379	54.1859	1	1		1	19.8702	0				CID	/Neuroblastom-Imaging/Imaging-Sample1/ZW_Neuroblastom_E22965-08_3_RA3_01_4008.d/+MS2(806.8965), 45.4eV, 54.2min #15137	ZW_Neuroblastom_E22965-08_3_RA3_01_4008.d	SwissProt-human-oReAlk2019_Mascot_2019-10-14 16:08:34	Protein Search
605.956	0.706708	1815.85	1815.85	27.8 (M.expect:0.0,M.score:27.8)	48 - 64	K.DSGRDYVSQFEGSALGK.Q	61510	APOA1_HUMAN	Apolipoprotein A-I OS=Homo sapiens OX=9606 GN=APOA1 PE=1 SV=1	3016		TRUE	4762	1814.84	605.955	1814.84	3	0.000428233	0.0012847	0.707492	4.32664	0.00248209	5.98417	0.00282256	40.4007	1	1		1	12.4183	1				CID	/Neuroblastom-Imaging/Imaging-Sample1/ZW_Neuroblastom_E22965-08_3_RA3_01_4008.d/+MS2(605.9555), 27.0eV, 40.4min #11321	ZW_Neuroblastom_E22965-08_3_RA3_01_4008.d	SwissProt-human-oReAlk2019_Mascot_2019-10-14 16:08:34	Protein Search
488.261	3.72018	975.514	975.511	15.0 (M.expect:0.0,M.score:15.0)	256 - 264	R.ISASAEELR.Q	274384	APOA4_HUMAN	Apolipoprotein A-IV OS=Homo sapiens OX=9606 GN=APOA4 PE=1 SV=3	272		TRUE	5178	974.507	488.259	974.503	2	0.00181642	0.00363283	3.72402	9.31466	0.00341068	11.5976	0.00683393	22.0053	1	1		1	20.056	0				CID	/Neuroblastom-Imaging/Imaging-Sample1/ZW_Neuroblastom_E22965-08_3_RA3_01_4008.d/+MS2(488.2607), 26.5eV, 22.0min #4921	ZW_Neuroblastom_E22965-08_3_RA3_01_4008.d	SwissProt-human-oReAlk2019_Mascot_2019-10-14 16:08:34	Protein Search
492.28	0.712956	983.553	983.552	53.9 (M.expect:0.0,M.score:53.9)	267 - 275	R.LAPLAEDVR.G	222700	APOA4_HUMAN	Apolipoprotein A-IV OS=Homo sapiens OX=9606 GN=APOA4 PE=1 SV=3	295		TRUE	5570	982.545	492.28	982.545	2	0.000350974	0.000701948	0.713687	3.18801	0.000823648	3.95919	0.00113477	29.6892	1	1		1	40.4128	0				CID	/Neuroblastom-Imaging/Imaging-Sample1/ZW_Neuroblastom_E22965-08_3_RA3_01_4008.d/+MS2(492.2800), 26.7eV, 29.7min #7718	ZW_Neuroblastom_E22965-08_3_RA3_01_4008.d	SwissProt-human-oReAlk2019_Mascot_2019-10-14 16:08:34	Protein Search
644.336	0.379981	1287.67	1287.67	19.1 (M.expect:0.0,M.score:19.1)	144 - 154	R.TQVNTQAEQLR.R	95580	APOA4_HUMAN	Apolipoprotein A-IV OS=Homo sapiens OX=9606 GN=APOA4 PE=1 SV=3	1188		TRUE	4340	1286.66	644.336	1286.66	2	0.000244836	0.000489671	0.380278	7.58582	0.00487664	19.2948	0.0105224	20.0613	1	1		1	21.472	0				CID	/Neuroblastom-Imaging/Imaging-Sample1/ZW_Neuroblastom_E22965-08_3_RA3_01_4008.d/+MS2(644.3365), 33.0eV, 20.1min #4192	ZW_Neuroblastom_E22965-08_3_RA3_01_4008.d	SwissProt-human-oReAlk2019_Mascot_2019-10-14 16:08:34	Protein Search
506.824	0.192594	1012.64	1012.64	26.4 (M.expect:0.0,M.score:26.4)	220 - 229	R.TGISPLALIK.G	21350	APOB_HUMAN	Apolipoprotein B-100 OS=Homo sapiens OX=9606 GN=APOB PE=1 SV=2	355		TRUE	12645	1011.63	506.824	1011.63	2	9.76113e-05	0.000195223	0.192786	7.96973	0.00376132	10.8932	0.00460901	48.7304	1	1		1	15.8585	0				CID	/Neuroblastom-Imaging/Imaging-Sample1/ZW_Neuroblastom_E22965-08_3_RA3_01_4008.d/+MS2(506.8238), 27.4eV, 48.7min #13687	ZW_Neuroblastom_E22965-08_3_RA3_01_4008.d	SwissProt-human-oReAlk2019_Mascot_2019-10-14 16:08:34	Protein Search
636.344	-2.13284	1271.68	1271.68	17.3 (M.expect:0.0,M.score:17.3)	642 - 654	K.SVSLPSLDPASAK.I	26914	APOB_HUMAN	Apolipoprotein B-100 OS=Homo sapiens OX=9606 GN=APOB PE=1 SV=2	1112		TRUE	4564	1270.67	636.346	1270.68	2	-0.00135722	-0.00271444	-2.13453	11.7304	0.00773699	13.6018	0.00884065	41.1275	1	1		1	13.3019	0				CID	/Neuroblastom-Imaging/Imaging-Sample1/ZW_Neuroblastom_E22965-08_3_RA3_01_4008.d/+MS2(636.3444), 33.0eV, 41.1min #11542	ZW_Neuroblastom_E22965-08_3_RA3_01_4008.d	SwissProt-human-oReAlk2019_Mascot_2019-10-14 16:08:34	Protein Search
640.864	-0.744537	1280.72	1280.72	20.4 (M.expect:0.0,M.score:20.4)	950 - 960	K.TEVIPPLIENR.Q	18402	APOB_HUMAN	Apolipoprotein B-100 OS=Homo sapiens OX=9606 GN=APOB PE=1 SV=2	1174		TRUE	7807	1279.71	640.864	1279.71	2	-0.000477147	-0.000954294	-0.745123	7.9612	0.0030865	10.1186	0.00704487	44.9057	1	1		1	25.292	0				CID	/Neuroblastom-Imaging/Imaging-Sample1/ZW_Neuroblastom_E22965-08_3_RA3_01_4008.d/+MS2(640.8636), 33.0eV, 44.9min #12624	ZW_Neuroblastom_E22965-08_3_RA3_01_4008.d	SwissProt-human-oReAlk2019_Mascot_2019-10-14 16:08:34	Protein Search
572.956	1.86189	1716.85	1716.85	20.9 (M.expect:0.0,M.score:20.9)	45 - 60	K.DALSSVQESQVAQQAR.G	114750	APOC3_HUMAN	Apolipoprotein C-III OS=Homo sapiens OX=9606 GN=APOC3 PE=1 SV=1	2746		TRUE	6078	1715.85	572.955	1715.84	3	0.00106678	0.00320035	1.86408	14.4066	0.00923019	27.6275	0.0172444	32.8279	1	1		1	19.721	0				CID	/Neuroblastom-Imaging/Imaging-Sample1/ZW_Neuroblastom_E22965-08_3_RA3_01_4008.d/+MS2(572.9563), 26.5eV, 32.8min #8822	ZW_Neuroblastom_E22965-08_3_RA3_01_4008.d	SwissProt-human-oReAlk2019_Mascot_2019-10-14 16:08:34	Protein Search
474.767	0.929243	948.527	948.526	18.1 (M.expect:0.0,M.score:18.1)	177 - 185	R.LAVYQAGAR.E	151826	APOE_HUMAN	Apolipoprotein E OS=Homo sapiens OX=9606 GN=APOE PE=1 SV=1	224		TRUE	7027	947.52	474.767	947.519	2	0.000441174	0.000882348	0.93023	13.0222	0.0072399	17.6608	0.0119113	22.2685	1	1		1	25.3587	0				CID	/Neuroblastom-Imaging/Imaging-Sample1/ZW_Neuroblastom_E22965-08_3_RA3_01_4008.d/+MS2(474.7672), 26.0eV, 22.3min #5025	ZW_Neuroblastom_E22965-08_3_RA3_01_4008.d	SwissProt-human-oReAlk2019_Mascot_2019-10-14 16:08:34	Protein Search
484.78	1.28677	968.554	968.552	16.3 (M.expect:0.0,M.score:16.3)	199 - 207	R.LGPLVEQGR.V	234200	APOE_HUMAN	Apolipoprotein E OS=Homo sapiens OX=9606 GN=APOE PE=1 SV=1	255		TRUE	6679	967.546	484.78	967.545	2	0.000623799	0.0012476	1.2881	3.13835	0.00148588	74.1703	0.0127585	26.2548	1	1		1	33.6224	0				CID	/Neuroblastom-Imaging/Imaging-Sample1/ZW_Neuroblastom_E22965-08_3_RA3_01_4008.d/+MS2(484.7804), 26.4eV, 26.3min #6497	ZW_Neuroblastom_E22965-08_3_RA3_01_4008.d	SwissProt-human-oReAlk2019_Mascot_2019-10-14 16:08:34	Protein Search
749.405	0.548327	1497.8	1497.8	17.6 (M.expect:0.0,M.score:17.6)	210 - 224	R.AATVGSLAGQPLQER.A	99870	APOE_HUMAN	Apolipoprotein E OS=Homo sapiens OX=9606 GN=APOE PE=1 SV=1	1924		TRUE	10827	1496.8	749.405	1496.79	2	0.000410919	0.000821839	0.548696	9.69973	0.00721209	38.7606	0.0101618	32.5096	1	1		1	21.0141	0				CID	/Neuroblastom-Imaging/Imaging-Sample1/ZW_Neuroblastom_E22965-08_3_RA3_01_4008.d/+MS2(749.4050), 38.9eV, 32.5min #8706	ZW_Neuroblastom_E22965-08_3_RA3_01_4008.d	SwissProt-human-oReAlk2019_Mascot_2019-10-14 16:08:34	Protein Search
736.38	-0.641881	1471.75	1471.75	28.4 (M.expect:0.0,M.score:28.4)	85 - 97	K.ELPQFATGENLPR.V	56590	API5_HUMAN	Apoptosis inhibitor 5 OS=Homo sapiens OX=9606 GN=API5 PE=1 SV=3	1821		TRUE	8459	1470.75	736.381	1470.75	2	-0.000472668	-0.000945336	-0.64232	14.751	0.0106486	22.3221	0.0167516	42.8078	1	1		1	21.7444	0				CID	/Neuroblastom-Imaging/Imaging-Sample1/ZW_Neuroblastom_E22965-08_3_RA3_01_4008.d/+MS2(736.3801), 37.4eV, 42.8min #12034	ZW_Neuroblastom_E22965-08_3_RA3_01_4008.d	SwissProt-human-oReAlk2019_Mascot_2019-10-14 16:08:34	Protein Search
716.4	-2.25867	1431.79	1431.8	35.5 (M.expect:0.0,M.score:35.5)	22 - 34	K.TGALLLQGFIQDR.A	14848	BAX_HUMAN	Apoptosis regulator BAX OS=Homo sapiens OX=9606 GN=BAX PE=1 SV=1	1714		TRUE	13112	1430.78	716.401	1430.79	2	-0.00161811	-0.00323622	-2.26026	6.93741	0.00386308	8.22849	0.00688859	55.4335	2	1		1	25.7596	0				CID	/Neuroblastom-Imaging/Imaging-Sample1/ZW_Neuroblastom_E22965-08_3_RA3_01_4008.d/+MS2(716.3997), 35.0eV, 55.4min #15477	ZW_Neuroblastom_E22965-08_3_RA3_01_4008.d	SwissProt-human-oReAlk2019_Mascot_2019-10-14 16:08:34	Protein Search
716.4	-2.11908	1431.79	1431.8	26.0 (M.expect:0.0,M.score:26.0)	22 - 34	K.TGALLLQGFIQDR.A	17502	BAX_HUMAN	Apoptosis regulator BAX OS=Homo sapiens OX=9606 GN=BAX PE=1 SV=1	1715		TRUE	12319	1430.79	716.401	1430.79	2	-0.00151811	-0.00303622	-2.12057	5.22742	0.00416126	7.54911	0.00734223	55.5335	2	1		1	20.6158	0				CID	/Neuroblastom-Imaging/Imaging-Sample1/ZW_Neuroblastom_E22965-08_3_RA3_01_4008.d/+MS2(716.3998), 35.0eV, 55.5min #15502	ZW_Neuroblastom_E22965-08_3_RA3_01_4008.d	SwissProt-human-oReAlk2019_Mascot_2019-10-14 16:08:34	Protein Search
446.25	0.0890305	891.494	891.493	17.3 (M.expect:0.0,M.score:17.3)	1,210 - 1,216	K.LLDDLFR.K	25602	ACINU_HUMAN	Apoptotic chromatin condensation inducer in the nucleus OS=Homo sapiens OX=9606 GN=ACIN1 PE=1 SV=2	129		TRUE	15198	890.486	446.25	890.486	2	3.97299e-05	7.94598e-05	0.0891311	5.08033	0.00215755	5.73114	0.00259186	51.8449	1	1		1	33.6979	0				CID	/Neuroblastom-Imaging/Imaging-Sample1/ZW_Neuroblastom_E22965-08_3_RA3_01_4008.d/+MS2(446.2504), 24.8eV, 51.8min #14503	ZW_Neuroblastom_E22965-08_3_RA3_01_4008.d	SwissProt-human-oReAlk2019_Mascot_2019-10-14 16:08:34	Protein Search
574.345	-0.627475	1721.02	1721.02	23.3 (M.expect:0.0,M.score:23.3)	525 - 540	R.SAQPLPLKIEELALAK.G	16800	ACINU_HUMAN	Apoptotic chromatin condensation inducer in the nucleus OS=Homo sapiens OX=9606 GN=ACIN1 PE=1 SV=2	2754		TRUE	10913	1720.01	574.345	1720.01	3	-0.000360387	-0.00108116	-0.62821	8.05273	0.00607158	31.8899	0.0105557	50.6349	1	1		1	11.3391	1				CID	/Neuroblastom-Imaging/Imaging-Sample1/ZW_Neuroblastom_E22965-08_3_RA3_01_4008.d/+MS2(574.3447), 26.5eV, 50.6min #14199	ZW_Neuroblastom_E22965-08_3_RA3_01_4008.d	SwissProt-human-oReAlk2019_Mascot_2019-10-14 16:08:34	Protein Search
1211.14	-3.47168	2421.27	2421.28	17.6 (M.expect:0.0,M.score:17.6)	399 - 421	K.ASLVALPEQTASEEETPPPLLTK.E	6972	ACINU_HUMAN	Apoptotic chromatin condensation inducer in the nucleus OS=Homo sapiens OX=9606 GN=ACIN1 PE=1 SV=2	3786		TRUE	14271	2420.26	1211.14	2420.27	2	-0.00420468	-0.00840936	-3.47312	11.2725	0.00613662	14.2539	0.00906518	55.2219	2	1		1	14.8985	0				CID	/Neuroblastom-Imaging/Imaging-Sample1/ZW_Neuroblastom_E22965-08_3_RA3_01_4008.d/+MS2(1211.1374), 65.0eV, 55.2min #15422	ZW_Neuroblastom_E22965-08_3_RA3_01_4008.d	SwissProt-human-oReAlk2019_Mascot_2019-10-14 16:08:34	Protein Search
1211.14	-2.05152	2421.27	2421.28	41.3 (M.expect:0.0,M.score:41.3)	399 - 421	K.ASLVALPEQTASEEETPPPLLTK.E	17376	ACINU_HUMAN	Apoptotic chromatin condensation inducer in the nucleus OS=Homo sapiens OX=9606 GN=ACIN1 PE=1 SV=2	3787		TRUE	13047	2420.26	1211.14	2420.27	2	-0.00248468	-0.00496936	-2.05237	13.9497	0.014099	17.4617	0.017527	55.2846	2	1		1	23.5873	0				CID	/Neuroblastom-Imaging/Imaging-Sample1/ZW_Neuroblastom_E22965-08_3_RA3_01_4008.d/+MS2(1211.1391), 65.0eV, 55.3min #15443	ZW_Neuroblastom_E22965-08_3_RA3_01_4008.d	SwissProt-human-oReAlk2019_Mascot_2019-10-14 16:08:34	Protein Search
764.065	1.29055	2290.18	2290.18	19.4 (M.expect:0.0,M.score:19.4)	421 - 443	K.TLSSPSNRPSGETSVPPPPAVGR.M	44808	ATX2L_HUMAN	Ataxin-2-like protein OS=Homo sapiens OX=9606 GN=ATXN2L PE=1 SV=2	3740		TRUE	5017	2289.17	764.064	2289.17	3	0.000986067	0.0029582	1.29169	10.8241	0.00697913	16.0703	0.0106084	28.4978	1	1		1	24.8007	0				CID	/Neuroblastom-Imaging/Imaging-Sample1/ZW_Neuroblastom_E22965-08_3_RA3_01_4008.d/+MS2(764.0654), 35.4eV, 28.5min #7321	ZW_Neuroblastom_E22965-08_3_RA3_01_4008.d	SwissProt-human-oReAlk2019_Mascot_2019-10-14 16:08:34	Protein Search
726.133	1.45919	2901.51	2901.51	17.2 (M.expect:0.0,M.score:17.2)	72 - 100	R.GAEGILAPQPPPPQQHQERPGAAAIGSAR.G	18612	ATX2L_HUMAN	Ataxin-2-like protein OS=Homo sapiens OX=9606 GN=ATXN2L PE=1 SV=2	3930		TRUE	3970	2900.5	726.132	2900.5	4	0.00105957	0.00423826	1.46071	2.42509	0.00233453	2.81758	0.00352238	30.2268	1	1		1	20.7932	0				CID	/Neuroblastom-Imaging/Imaging-Sample1/ZW_Neuroblastom_E22965-08_3_RA3_01_4008.d/+MS2(726.1335), 30.4eV, 30.2min #7906	ZW_Neuroblastom_E22965-08_3_RA3_01_4008.d	SwissProt-human-oReAlk2019_Mascot_2019-10-14 16:08:34	Protein Search
513.801	-0.289234	1026.59	1026.59	23.2 (M.expect:0.0,M.score:23.2)	195 - 204	K.AVDSLVPIGR.G	36742	ATPA_HUMAN	ATP synthase subunit alpha, mitochondrial OS=Homo sapiens OX=9606 GN=ATP5F1A PE=1 SV=1	387		TRUE	5947	1025.59	513.801	1025.59	2	-0.000148609	-0.000297217	-0.289518	4.02786	0.0017657	5.63936	0.00205287	39.4674	2	1		1	21.0726	0				CID	/Neuroblastom-Imaging/Imaging-Sample1/ZW_Neuroblastom_E22965-08_3_RA3_01_4008.d/+MS2(513.8006), 27.8eV, 39.5min #11020	ZW_Neuroblastom_E22965-08_3_RA3_01_4008.d	SwissProt-human-oReAlk2019_Mascot_2019-10-14 16:08:34	Protein Search
513.801	0.450352	1026.59	1026.59	25.4 (M.expect:0.0,M.score:25.4)	195 - 204	K.AVDSLVPIGR.G	121126	ATPA_HUMAN	ATP synthase subunit alpha, mitochondrial OS=Homo sapiens OX=9606 GN=ATP5F1A PE=1 SV=1	388		TRUE	10563	1025.59	513.801	1025.59	2	0.000231391	0.000462783	0.450794	6.37786	0.00355282	51.7736	0.00961993	39.5179	2	1		1	26.8194	0				CID	/Neuroblastom-Imaging/Imaging-Sample1/ZW_Neuroblastom_E22965-08_3_RA3_01_4008.d/+MS2(513.8010), 27.8eV, 39.5min #11033	ZW_Neuroblastom_E22965-08_3_RA3_01_4008.d	SwissProt-human-oReAlk2019_Mascot_2019-10-14 16:08:34	Protein Search
712.345	6.4493	1423.68	1423.67	17.1 (M.expect:0.0,M.score:17.1)	46 - 58	K.TGTAEMSSILEER.I	27736	ATPA_HUMAN	ATP synthase subunit alpha, mitochondrial OS=Homo sapiens OX=9606 GN=ATP5F1A PE=1 SV=1	1688		TRUE	6316	1422.68	712.34	1422.67	2	0.00459412	0.00918825	6.45386	7.18478	0.00346264	8.14202	0.00557469	37.6209	1	1		1	11.9498	0				CID	/Neuroblastom-Imaging/Imaging-Sample1/ZW_Neuroblastom_E22965-08_3_RA3_01_4008.d/+MS2(712.3449), 34.5eV, 37.6min #10446	ZW_Neuroblastom_E22965-08_3_RA3_01_4008.d	SwissProt-human-oReAlk2019_Mascot_2019-10-14 16:08:34	Protein Search
812.946	-3.94788	1624.88	1624.89	21.3 (M.expect:0.0,M.score:21.3)	134 - 149	R.TGAIVDVPVGEELLGR.V	16070	ATPA_HUMAN	ATP synthase subunit alpha, mitochondrial OS=Homo sapiens OX=9606 GN=ATP5F1A PE=1 SV=1	2422		TRUE	13927	1623.88	812.949	1623.88	2	-0.00320941	-0.00641882	-3.95032	5.93548	0.00517252	12.4135	0.00620443	56.4902	1	1		1	24.301	0				CID	/Neuroblastom-Imaging/Imaging-Sample1/ZW_Neuroblastom_E22965-08_3_RA3_01_4008.d/+MS2(812.9457), 45.6eV, 56.5min #15756	ZW_Neuroblastom_E22965-08_3_RA3_01_4008.d	SwissProt-human-oReAlk2019_Mascot_2019-10-14 16:08:34	Protein Search
994.517	-3.68734	1988.03	1988.03	15.2 (M.expect:0.0,M.score:15.2)	388 - 406	R.AIAELGIYPAVDPLDSTSR.I	8122	ATPB_HUMAN	ATP synthase subunit beta, mitochondrial OS=Homo sapiens OX=9606 GN=ATP5F1B PE=1 SV=3	3409		TRUE	14110	1987.02	994.52	1987.03	2	-0.00366712	-0.00733424	-3.68921	10.9773	0.00957114	14.2178	0.014422	60.908	1	1		1	15.4008	0				CID	/Neuroblastom-Imaging/Imaging-Sample1/ZW_Neuroblastom_E22965-08_3_RA3_01_4008.d/+MS2(994.5167), 54.7eV, 60.9min #16847	ZW_Neuroblastom_E22965-08_3_RA3_01_4008.d	SwissProt-human-oReAlk2019_Mascot_2019-10-14 16:08:34	Protein Search
601.348	-4.78198	1201.69	1201.69	13.6 (M.expect:0.0,M.score:13.6)	176 - 185	R.LLNFPTIVER.G	10392	ASNA_HUMAN	ATPase ASNA1 OS=Homo sapiens OX=9606 GN=ASNA1 PE=1 SV=2	876		TRUE	11883	1200.68	601.351	1200.69	2	-0.00287563	-0.00575126	-4.78599	18.3842	0.00645439	24.8734	0.00860729	51.2963	1	1		1	9.92441	0				CID	/Neuroblastom-Imaging/Imaging-Sample1/ZW_Neuroblastom_E22965-08_3_RA3_01_4008.d/+MS2(601.3477), 33.0eV, 51.3min #14366	ZW_Neuroblastom_E22965-08_3_RA3_01_4008.d	SwissProt-human-oReAlk2019_Mascot_2019-10-14 16:08:34	Protein Search
460.757	-1.86277	920.507	920.509	17.0 (M.expect:0.0,M.score:17.0)	3,798 - 3,805	K.SVGFLVEK.R	648472	ABCAD_HUMAN	ATP-binding cassette sub-family A member 13 OS=Homo sapiens OX=9606 GN=ABCA13 PE=2 SV=3	180		TRUE	8508	919.5	460.758	919.501	2	-0.000858284	-0.00171657	-1.86481	2.1433	0.000871044	2.73313	0.000943478	57.1056	4	1		1	17.7247	0	Acetyl: 1			CID	/Neuroblastom-Imaging/Imaging-Sample1/ZW_Neuroblastom_E22965-08_3_RA3_01_4008.d/+MS2(460.7572), 25.4eV, 57.1min #15916	ZW_Neuroblastom_E22965-08_3_RA3_01_4008.d	SwissProt-human-oReAlk2019_Mascot_2019-10-14 16:08:34	Protein Search
460.757	-1.38529	920.507	920.509	15.0 (M.expect:0.0,M.score:15.0)	3,798 - 3,805	K.SVGFLVEK.R	31436	ABCAD_HUMAN	ATP-binding cassette sub-family A member 13 OS=Homo sapiens OX=9606 GN=ABCA13 PE=2 SV=3	181		TRUE	15371	919.5	460.758	919.501	2	-0.000638284	-0.00127657	-1.38681	9.01373	0.00318443	9.01373	0.00318443	57.413	4	1		1	11.0072	0	Acetyl: 1			CID	/Neuroblastom-Imaging/Imaging-Sample1/ZW_Neuroblastom_E22965-08_3_RA3_01_4008.d/+MS2(460.7574), 25.4eV, 57.4min #15999	ZW_Neuroblastom_E22965-08_3_RA3_01_4008.d	SwissProt-human-oReAlk2019_Mascot_2019-10-14 16:08:34	Protein Search
460.757	-1.36359	920.508	920.509	14.8 (M.expect:0.0,M.score:14.8)	3,798 - 3,805	K.SVGFLVEK.R	381954	ABCAD_HUMAN	ATP-binding cassette sub-family A member 13 OS=Homo sapiens OX=9606 GN=ABCA13 PE=2 SV=3	182		TRUE	8626	919.5	460.758	919.501	2	-0.000628284	-0.00125657	-1.36508	4.0158	0.00165197	5.14508	0.00231414	57.048	4	1		1	16.5529	0	Acetyl: 1			CID	/Neuroblastom-Imaging/Imaging-Sample1/ZW_Neuroblastom_E22965-08_3_RA3_01_4008.d/+MS2(460.7574), 25.4eV, 57.0min #15900	ZW_Neuroblastom_E22965-08_3_RA3_01_4008.d	SwissProt-human-oReAlk2019_Mascot_2019-10-14 16:08:34	Protein Search
460.757	-1.12485	920.508	920.509	19.4 (M.expect:0.0,M.score:19.4)	3,798 - 3,805	K.SVGFLVEK.R	553842	ABCAD_HUMAN	ATP-binding cassette sub-family A member 13 OS=Homo sapiens OX=9606 GN=ABCA13 PE=2 SV=3	183		TRUE	11587	919.5	460.758	919.501	2	-0.000518284	-0.00103657	-1.12608	7.28703	0.00280943	9.93571	0.00529168	57.1613	4	1		1	19.5901	0	Acetyl: 1			CID	/Neuroblastom-Imaging/Imaging-Sample1/ZW_Neuroblastom_E22965-08_3_RA3_01_4008.d/+MS2(460.7575), 25.4eV, 57.2min #15931	ZW_Neuroblastom_E22965-08_3_RA3_01_4008.d	SwissProt-human-oReAlk2019_Mascot_2019-10-14 16:08:34	Protein Search
406.22	3.24912	811.433	811.431	17.1 (M.expect:0.0,M.score:17.1)	489 - 495	K.STTLFSR.H	82210	ACLY_HUMAN	ATP-citrate synthase OS=Homo sapiens OX=9606 GN=ACLY PE=1 SV=3	47		TRUE	9590	810.426	406.219	810.424	2	0.00131986	0.00263972	3.25315	8.63227	0.00210939	14.6479	0.00532107	24.1518	1	1		1	14.6022	0				CID	/Neuroblastom-Imaging/Imaging-Sample1/ZW_Neuroblastom_E22965-08_3_RA3_01_4008.d/+MS2(406.2204), 23.2eV, 24.2min #5729	ZW_Neuroblastom_E22965-08_3_RA3_01_4008.d	SwissProt-human-oReAlk2019_Mascot_2019-10-14 16:08:34	Protein Search
530.758	1.86889	1060.51	1060.51	18.7 (M.expect:0.0,M.score:18.7)	34 - 42	R.VTPDTDWAR.L	59340	ACLY_HUMAN	ATP-citrate synthase OS=Homo sapiens OX=9606 GN=ACLY PE=1 SV=3	472		TRUE	3372	1059.5	530.757	1059.5	2	0.00099193	0.00198386	1.87067	15.3246	0.00950064	42.0283	0.0148152	26.7828	1	1		1	16.3446	0				CID	/Neuroblastom-Imaging/Imaging-Sample1/ZW_Neuroblastom_E22965-08_3_RA3_01_4008.d/+MS2(530.7575), 28.8eV, 26.8min #6717	ZW_Neuroblastom_E22965-08_3_RA3_01_4008.d	SwissProt-human-oReAlk2019_Mascot_2019-10-14 16:08:34	Protein Search
746.365	1.04957	1491.72	1491.72	30.0 (M.expect:0.0,M.score:30.0)	663 - 676	R.SGGMSNELNNIISR.T	94338	ACLY_HUMAN	ATP-citrate synthase OS=Homo sapiens OX=9606 GN=ACLY PE=1 SV=3	1900		TRUE	10625	1490.72	746.365	1490.71	2	0.00078336	0.00156672	1.05027	8.02875	0.00547675	9.29881	0.00677463	40.2951	1	1		1	18.7193	0				CID	/Neuroblastom-Imaging/Imaging-Sample1/ZW_Neuroblastom_E22965-08_3_RA3_01_4008.d/+MS2(746.3654), 38.6eV, 40.3min #11284	ZW_Neuroblastom_E22965-08_3_RA3_01_4008.d	SwissProt-human-oReAlk2019_Mascot_2019-10-14 16:08:34	Protein Search
754.363	0.723604	1507.72	1507.72	44.9 (M.expect:0.0,M.score:44.9)	663 - 676	R.SGGMSNELNNIISR.T	54388	ACLY_HUMAN	ATP-citrate synthase OS=Homo sapiens OX=9606 GN=ACLY PE=1 SV=3	1952		TRUE	7806	1506.71	754.362	1506.71	2	0.00054586	0.00109172	0.724087	5.61354	0.00350194	12.899	0.0130162	33.2979	1	1		1	12.167	0	Oxidation: 4			CID	/Neuroblastom-Imaging/Imaging-Sample1/ZW_Neuroblastom_E22965-08_3_RA3_01_4008.d/+MS2(754.3626), 39.5eV, 33.3min #8978	ZW_Neuroblastom_E22965-08_3_RA3_01_4008.d	SwissProt-human-oReAlk2019_Mascot_2019-10-14 16:08:34	Protein Search
498.746	3.35885	996.485	996.482	15.7 (M.expect:0.0,M.score:15.7)	17 - 24	K.MTPSYEIR.A	64058	DHX9_HUMAN	ATP-dependent RNA helicase A OS=Homo sapiens OX=9606 GN=DHX9 PE=1 SV=4	326		TRUE	2832	995.478	498.745	995.475	2	0.00167521	0.00335042	3.36224	5.92509	0.00215065	14.1351	0.00943985	25.3167	1	1		1	12.5076	0				CID	/Neuroblastom-Imaging/Imaging-Sample1/ZW_Neuroblastom_E22965-08_3_RA3_01_4008.d/+MS2(498.7463), 26.9eV, 25.3min #6160	ZW_Neuroblastom_E22965-08_3_RA3_01_4008.d	SwissProt-human-oReAlk2019_Mascot_2019-10-14 16:08:34	Protein Search
513.274	-0.22733	1025.54	1025.54	46.1 (M.expect:0.0,M.score:46.1)	64 - 71	R.DFVNYLVR.I	129242	DHX9_HUMAN	ATP-dependent RNA helicase A OS=Homo sapiens OX=9606 GN=DHX9 PE=1 SV=4	380		TRUE	9989	1024.53	513.274	1024.53	2	-0.000116683	-0.000233365	-0.227553	3.71312	0.00188656	5.88363	0.00220745	49.241	3	1		1	37.5471	0				CID	/Neuroblastom-Imaging/Imaging-Sample1/ZW_Neuroblastom_E22965-08_3_RA3_01_4008.d/+MS2(513.2743), 27.8eV, 49.2min #13816	ZW_Neuroblastom_E22965-08_3_RA3_01_4008.d	SwissProt-human-oReAlk2019_Mascot_2019-10-14 16:08:34	Protein Search
513.275	0.55198	1025.54	1025.54	26.0 (M.expect:0.0,M.score:26.0)	64 - 71	R.DFVNYLVR.I	389898	DHX9_HUMAN	ATP-dependent RNA helicase A OS=Homo sapiens OX=9606 GN=DHX9 PE=1 SV=4	381		TRUE	8530	1024.53	513.274	1024.53	2	0.000283317	0.000566635	0.552522	3.47298	0.00147152	6.49261	0.00246053	49.343	3	1		1	38.6217	0				CID	/Neuroblastom-Imaging/Imaging-Sample1/ZW_Neuroblastom_E22965-08_3_RA3_01_4008.d/+MS2(513.2746), 27.8eV, 49.3min #13843	ZW_Neuroblastom_E22965-08_3_RA3_01_4008.d	SwissProt-human-oReAlk2019_Mascot_2019-10-14 16:08:34	Protein Search
513.275	2.16904	1025.54	1025.54	31.6 (M.expect:0.0,M.score:31.6)	64 - 71	R.DFVNYLVR.I	12778	DHX9_HUMAN	ATP-dependent RNA helicase A OS=Homo sapiens OX=9606 GN=DHX9 PE=1 SV=4	382		TRUE	6819	1024.54	513.274	1024.53	2	0.00111332	0.00222663	2.17117	1.79828	0.000930005	3.11057	0.00112266	49.2107	3	1		1	35.7733	0				CID	/Neuroblastom-Imaging/Imaging-Sample1/ZW_Neuroblastom_E22965-08_3_RA3_01_4008.d/+MS2(513.2755), 27.8eV, 49.2min #13814	ZW_Neuroblastom_E22965-08_3_RA3_01_4008.d	SwissProt-human-oReAlk2019_Mascot_2019-10-14 16:08:34	Protein Search
538.281	1.24407	1075.55	1075.55	26.6 (M.expect:0.0,M.score:26.6)	315 - 323	K.LAQFEPSQR.Q	204460	DHX9_HUMAN	ATP-dependent RNA helicase A OS=Homo sapiens OX=9606 GN=DHX9 PE=1 SV=4	506		TRUE	3560	1074.55	538.28	1074.55	2	0.000669658	0.00133932	1.24523	8.31466	0.00366287	10.5665	0.00510953	23.0522	1	1		1	18.3759	0				CID	/Neuroblastom-Imaging/Imaging-Sample1/ZW_Neuroblastom_E22965-08_3_RA3_01_4008.d/+MS2(538.2809), 29.3eV, 23.1min #5321	ZW_Neuroblastom_E22965-08_3_RA3_01_4008.d	SwissProt-human-oReAlk2019_Mascot_2019-10-14 16:08:34	Protein Search
396.201	3.46159	1186.59	1186.59	13.7 (M.expect:0.0,M.score:13.7)	142 - 151	R.GANLKDYYSR.K	44218	DHX9_HUMAN	ATP-dependent RNA helicase A OS=Homo sapiens OX=9606 GN=DHX9 PE=1 SV=4	811		TRUE	7348	1185.58	396.2	1185.58	3	0.00137148	0.00411445	3.46746	7.53056	0.00465481	12.3265	0.00629155	20.7546	1	1		1	11.9019	1				CID	/Neuroblastom-Imaging/Imaging-Sample1/ZW_Neuroblastom_E22965-08_3_RA3_01_4008.d/+MS2(396.2013), 23.0eV, 20.8min #4468	ZW_Neuroblastom_E22965-08_3_RA3_01_4008.d	SwissProt-human-oReAlk2019_Mascot_2019-10-14 16:08:34	Protein Search
871.434	-0.0119925	1741.86	1741.86	58.2 (M.expect:0.0,M.score:58.2)	838 - 853	R.ELDALDANDELTPLGR.I	46058	DHX9_HUMAN	ATP-dependent RNA helicase A OS=Homo sapiens OX=9606 GN=DHX9 PE=1 SV=4	2802		TRUE	10109	1740.85	871.434	1740.85	2	-1.04506e-05	-2.09013e-05	-0.0119994	6.19331	0.00436758	11.3389	0.00865045	53.2331	1	1		1	20.1948	0				CID	/Neuroblastom-Imaging/Imaging-Sample1/ZW_Neuroblastom_E22965-08_3_RA3_01_4008.d/+MS2(871.4338), 48.6eV, 53.2min #14880	ZW_Neuroblastom_E22965-08_3_RA3_01_4008.d	SwissProt-human-oReAlk2019_Mascot_2019-10-14 16:08:34	Protein Search
1081.99	0.671202	2162.98	2162.97	43.8 (M.expect:0.0,M.score:43.8)	121 - 141	K.AENNSEVGASGYGVPGPTWDR.G	128090	DHX9_HUMAN	ATP-dependent RNA helicase A OS=Homo sapiens OX=9606 GN=DHX9 PE=1 SV=4	3652		TRUE	11730	2161.97	1081.99	2161.97	2	0.000726235	0.00145247	0.671515	8.69076	0.00493532	11.5364	0.00845911	41.5238	1	1		1	17.704	0				CID	/Neuroblastom-Imaging/Imaging-Sample1/ZW_Neuroblastom_E22965-08_3_RA3_01_4008.d/+MS2(1081.9912), 63.2eV, 41.5min #11651	ZW_Neuroblastom_E22965-08_3_RA3_01_4008.d	SwissProt-human-oReAlk2019_Mascot_2019-10-14 16:08:34	Protein Search
453.739	2.07821	906.47	906.468	16.9 (M.expect:0.0,M.score:16.9)	209 - 215	R.DVQEIFR.L	137784	DX39A_HUMAN	ATP-dependent RNA helicase DDX39A OS=Homo sapiens OX=9606 GN=DDX39A PE=1 SV=2	141		TRUE	12026	905.463	453.738	905.461	2	0.000942964	0.00188593	2.08052	4.54657	0.00171183	47.2818	0.015441	36.4697	1	1		1	22.1783	0				CID	/Neuroblastom-Imaging/Imaging-Sample1/ZW_Neuroblastom_E22965-08_3_RA3_01_4008.d/+MS2(453.7386), 25.1eV, 36.5min #10053	ZW_Neuroblastom_E22965-08_3_RA3_01_4008.d	SwissProt-human-oReAlk2019_Mascot_2019-10-14 16:08:34	Protein Search
421.753	0.98213	842.499	842.498	19.7 (M.expect:0.0,M.score:19.7)	561 - 568	R.GLDIPSIK.T	45808	DDX42_HUMAN	ATP-dependent RNA helicase DDX42 OS=Homo sapiens OX=9606 GN=DDX42 PE=1 SV=1	71		TRUE	12639	841.492	421.753	841.491	2	0.000414216	0.000828433	0.983304	6.3006	0.00147076	43.5043	0.0172628	38.7998	1	1		1	15.2773	0				CID	/Neuroblastom-Imaging/Imaging-Sample1/ZW_Neuroblastom_E22965-08_3_RA3_01_4008.d/+MS2(421.7531), 23.9eV, 38.8min #10816	ZW_Neuroblastom_E22965-08_3_RA3_01_4008.d	SwissProt-human-oReAlk2019_Mascot_2019-10-14 16:08:34	Protein Search
547.268	0.913754	1093.53	1093.53	24.1 (M.expect:0.0,M.score:24.1)	606 - 615	K.DSNFAGDLVR.N	106048	DDX42_HUMAN	ATP-dependent RNA helicase DDX42 OS=Homo sapiens OX=9606 GN=DDX42 PE=1 SV=1	553		TRUE	9042	1092.52	547.267	1092.52	2	0.000500068	0.00100014	0.914595	10.2143	0.00275945	13.99	0.00857814	37.6094	1	1		1	19.4673	0				CID	/Neuroblastom-Imaging/Imaging-Sample1/ZW_Neuroblastom_E22965-08_3_RA3_01_4008.d/+MS2(547.2678), 29.8eV, 37.6min #10437	ZW_Neuroblastom_E22965-08_3_RA3_01_4008.d	SwissProt-human-oReAlk2019_Mascot_2019-10-14 16:08:34	Protein Search
670.381	-2.57173	1339.75	1339.76	49.0 (M.expect:0.0,M.score:49.0)	548 - 560	K.DIPVLVATDVAAR.G	18462	DDX42_HUMAN	ATP-dependent RNA helicase DDX42 OS=Homo sapiens OX=9606 GN=DDX42 PE=1 SV=1	1390		TRUE	11229	1338.75	670.383	1338.75	2	-0.00172404	-0.00344808	-2.57367	8.31292	0.00424825	9.83993	0.00499876	54.4502	3	1		1	27.7179	0				CID	/Neuroblastom-Imaging/Imaging-Sample1/ZW_Neuroblastom_E22965-08_3_RA3_01_4008.d/+MS2(670.3809), 33.0eV, 54.5min #15220	ZW_Neuroblastom_E22965-08_3_RA3_01_4008.d	SwissProt-human-oReAlk2019_Mascot_2019-10-14 16:08:34	Protein Search
670.382	-0.796622	1339.76	1339.76	55.5 (M.expect:0.0,M.score:55.5)	548 - 560	K.DIPVLVATDVAAR.G	45478	DDX42_HUMAN	ATP-dependent RNA helicase DDX42 OS=Homo sapiens OX=9606 GN=DDX42 PE=1 SV=1	1391		TRUE	10149	1338.75	670.383	1338.75	2	-0.000534041	-0.00106808	-0.79722	7.72551	0.00386373	8.61102	0.00575692	54.5141	3	1		1	35.5643	0				CID	/Neuroblastom-Imaging/Imaging-Sample1/ZW_Neuroblastom_E22965-08_3_RA3_01_4008.d/+MS2(670.3821), 33.0eV, 54.5min #15244	ZW_Neuroblastom_E22965-08_3_RA3_01_4008.d	SwissProt-human-oReAlk2019_Mascot_2019-10-14 16:08:34	Protein Search
670.382	-0.528118	1339.76	1339.76	50.4 (M.expect:0.0,M.score:50.4)	548 - 560	K.DIPVLVATDVAAR.G	55780	DDX42_HUMAN	ATP-dependent RNA helicase DDX42 OS=Homo sapiens OX=9606 GN=DDX42 PE=1 SV=1	1392		TRUE	11310	1338.75	670.383	1338.75	2	-0.000354041	-0.000708082	-0.528515	4.53078	0.00298788	5.43904	0.00411582	54.5589	3	1		1	21.1719	0				CID	/Neuroblastom-Imaging/Imaging-Sample1/ZW_Neuroblastom_E22965-08_3_RA3_01_4008.d/+MS2(670.3823), 33.0eV, 54.6min #15255	ZW_Neuroblastom_E22965-08_3_RA3_01_4008.d	SwissProt-human-oReAlk2019_Mascot_2019-10-14 16:08:34	Protein Search
1155.11	-2.42583	2309.21	2309.21	18.9 (M.expect:0.0,M.score:18.9)	2 - 25	M.AAQVAPAAASSLGNPPPPPPSELK.K	7100	ARI1A_HUMAN	AT-rich interactive domain-containing protein 1A OS=Homo sapiens OX=9606 GN=ARID1A PE=1 SV=3	3742		TRUE	14491	2308.2	1155.11	2308.21	2	-0.00280209	-0.00560418	-2.42689	16.2377	0.00787644	20.1195	0.00974449	54.4585	1	1		1	20.812	0	Acetyl: 1			CID	/Neuroblastom-Imaging/Imaging-Sample1/ZW_Neuroblastom_E22965-08_3_RA3_01_4008.d/+MS2(1155.1076), 65.0eV, 54.5min #15224	ZW_Neuroblastom_E22965-08_3_RA3_01_4008.d	SwissProt-human-oReAlk2019_Mascot_2019-10-14 16:08:34	Protein Search
733.914	-0.215706	1466.82	1466.82	15.9 (M.expect:0.0,M.score:15.9)	220 - 233	K.IPPDSEATLVLVGR.A	30898	B3AT_HUMAN	Band 3 anion transport protein OS=Homo sapiens OX=9606 GN=SLC4A1 PE=1 SV=3	1812		TRUE	8922	1465.81	733.914	1465.81	2	-0.00015831	-0.00031662	-0.215855	5.90426	0.00443198	9.83422	0.0103064	47.7625	1	1		1	34.9226	0				CID	/Neuroblastom-Imaging/Imaging-Sample1/ZW_Neuroblastom_E22965-08_3_RA3_01_4008.d/+MS2(733.9141), 37.1eV, 47.8min #13423	ZW_Neuroblastom_E22965-08_3_RA3_01_4008.d	SwissProt-human-oReAlk2019_Mascot_2019-10-14 16:08:34	Protein Search
745.903	-0.340022	1490.8	1490.8	45.8 (M.expect:0.0,M.score:45.8)	234 - 246	R.ADFLEQPVLGFVR.L	16126	B3AT_HUMAN	Band 3 anion transport protein OS=Homo sapiens OX=9606 GN=SLC4A1 PE=1 SV=3	1899		TRUE	14721	1489.79	745.904	1489.79	2	-0.000253624	-0.000507247	-0.340252	12.6759	0.00702001	15.4742	0.0134002	61.0548	1	1		1	30.6302	0				CID	/Neuroblastom-Imaging/Imaging-Sample1/ZW_Neuroblastom_E22965-08_3_RA3_01_4008.d/+MS2(745.9035), 38.5eV, 61.1min #16881	ZW_Neuroblastom_E22965-08_3_RA3_01_4008.d	SwissProt-human-oReAlk2019_Mascot_2019-10-14 16:08:34	Protein Search
687.847	1.10101	1374.69	1374.69	36.5 (M.expect:0.0,M.score:36.5)	912 - 924	K.AVLEQEETAAASR.E	56304	E41L3_HUMAN	Band 4.1-like protein 3 OS=Homo sapiens OX=9606 GN=EPB41L3 PE=1 SV=2	1536		TRUE	2664	1373.68	687.847	1373.68	2	0.000757325	0.00151465	1.10181	6.42294	0.00310754	11.7443	0.00825319	23.2107	1	1		1	20.3247	0				CID	/Neuroblastom-Imaging/Imaging-Sample1/ZW_Neuroblastom_E22965-08_3_RA3_01_4008.d/+MS2(687.8474), 33.0eV, 23.2min #5381	ZW_Neuroblastom_E22965-08_3_RA3_01_4008.d	SwissProt-human-oReAlk2019_Mascot_2019-10-14 16:08:34	Protein Search
535.952	1.72894	1605.84	1605.84	31.1 (M.expect:0.0,M.score:31.1)	419 - 432	R.ASALIDRPAPYFER.S	79256	E41L3_HUMAN	Band 4.1-like protein 3 OS=Homo sapiens OX=9606 GN=EPB41L3 PE=1 SV=2	2303		TRUE	4988	1604.83	535.951	1604.83	3	0.000926627	0.00277988	1.73111	33.5688	0.0143991	40.8183	0.0179225	35.1705	1	1		1	24.2194	0				CID	/Neuroblastom-Imaging/Imaging-Sample1/ZW_Neuroblastom_E22965-08_3_RA3_01_4008.d/+MS2(535.9519), 25.7eV, 35.2min #9620	ZW_Neuroblastom_E22965-08_3_RA3_01_4008.d	SwissProt-human-oReAlk2019_Mascot_2019-10-14 16:08:34	Protein Search
563.827	-0.289733	1126.65	1126.65	52.4 (M.expect:0.0,M.score:52.4)	3,258 - 3,267	R.LEGDTLIIPR.V	57730	PGBM_HUMAN	Basement membrane-specific heparan sulfate proteoglycan core protein OS=Homo sapiens OX=9606 GN=HSPG2 PE=1 SV=4	641		TRUE	3219	1125.64	563.827	1125.64	2	-0.000163359	-0.000326718	-0.289992	4.57426	0.00289064	5.10726	0.00352923	42.0393	1	1		1	19.0947	0				CID	/Neuroblastom-Imaging/Imaging-Sample1/ZW_Neuroblastom_E22965-08_3_RA3_01_4008.d/+MS2(563.8268), 30.8eV, 42.0min #11806	ZW_Neuroblastom_E22965-08_3_RA3_01_4008.d	SwissProt-human-oReAlk2019_Mascot_2019-10-14 16:08:34	Protein Search
776.368	0.104044	1551.73	1551.73	47.9 (M.expect:0.0,M.score:47.9)	93 - 106	R.SIEYSPQLEDAGSR.E	63158	PGBM_HUMAN	Basement membrane-specific heparan sulfate proteoglycan core protein OS=Homo sapiens OX=9606 GN=HSPG2 PE=1 SV=4	2118		TRUE	7377	1550.72	776.368	1550.72	2	8.07766e-05	0.000161553	0.104112	4.99195	0.00242028	6.47443	0.00307855	32.7795	1	1		1	29.7693	0				CID	/Neuroblastom-Imaging/Imaging-Sample1/ZW_Neuroblastom_E22965-08_3_RA3_01_4008.d/+MS2(776.3680), 42.2eV, 32.8min #8807	ZW_Neuroblastom_E22965-08_3_RA3_01_4008.d	SwissProt-human-oReAlk2019_Mascot_2019-10-14 16:08:34	Protein Search
520.299	-5.04451	1558.88	1558.89	14.4 (M.expect:0.0,M.score:14.4)	453 - 467	R.VTVTSEGGRGTLIIR.D	35348	PGBM_HUMAN	Basement membrane-specific heparan sulfate proteoglycan core protein OS=Homo sapiens OX=9606 GN=HSPG2 PE=1 SV=4	2133		TRUE	2215	1557.88	520.302	1557.88	3	-0.00262466	-0.00787397	-5.05103	23.3067	0.0203684	26.2624	0.0254258	28.4531	1	1		1	9.58438	1				CID	/Neuroblastom-Imaging/Imaging-Sample1/ZW_Neuroblastom_E22965-08_3_RA3_01_4008.d/+MS2(520.2993), 25.4eV, 28.5min #7309	ZW_Neuroblastom_E22965-08_3_RA3_01_4008.d	SwissProt-human-oReAlk2019_Mascot_2019-10-14 16:08:34	Protein Search
661.984	-1.49698	1983.94	1983.94	16.9 (M.expect:0.0,M.score:16.9)	93 - 109	R.SIEYSPQLEDAGSREFR.E	27234	PGBM_HUMAN	Basement membrane-specific heparan sulfate proteoglycan core protein OS=Homo sapiens OX=9606 GN=HSPG2 PE=1 SV=4	3404		TRUE	3511	1982.93	661.985	1982.93	3	-0.00099098	-0.00297294	-1.4985	5.45087	0.00385223	17.9012	0.0121696	35.1795	1	1		1	23.387	1				CID	/Neuroblastom-Imaging/Imaging-Sample1/ZW_Neuroblastom_E22965-08_3_RA3_01_4008.d/+MS2(661.9841), 27.0eV, 35.2min #9626	ZW_Neuroblastom_E22965-08_3_RA3_01_4008.d	SwissProt-human-oReAlk2019_Mascot_2019-10-14 16:08:34	Protein Search
550.828	2.4574	1100.65	1100.65	32.1 (M.expect:0.0,M.score:32.1)	216 - 224	R.LLELFPVNR.Q	13828	BZW2_HUMAN	Basic leucine zipper and W2 domain-containing protein 2 OS=Homo sapiens OX=9606 GN=BZW2 PE=1 SV=1	566		TRUE	12250	1099.64	550.827	1099.64	2	0.00135361	0.00270721	2.45965	3.20182	0.00242779	15.9387	0.015626	52.1654	1	1		1	25.2741	0				CID	/Neuroblastom-Imaging/Imaging-Sample1/ZW_Neuroblastom_E22965-08_3_RA3_01_4008.d/+MS2(550.8281), 30.0eV, 52.2min #14598	ZW_Neuroblastom_E22965-08_3_RA3_01_4008.d	SwissProt-human-oReAlk2019_Mascot_2019-10-14 16:08:34	Protein Search
507.755	1.5196	1014.5	1014.5	14.6 (M.expect:0.0,M.score:14.6)	274 - 282	R.FFVSSSQGR.S	205302	BASI_HUMAN	Basigin OS=Homo sapiens OX=9606 GN=BSG PE=1 SV=2	362		TRUE	6700	1013.49	507.754	1013.49	2	0.000771584	0.00154317	1.52111	14.405	0.00350446	21.2713	0.0129738	24.2576	1	1		1	27.6136	0				CID	/Neuroblastom-Imaging/Imaging-Sample1/ZW_Neuroblastom_E22965-08_3_RA3_01_4008.d/+MS2(507.7546), 27.5eV, 24.3min #5774	ZW_Neuroblastom_E22965-08_3_RA3_01_4008.d	SwissProt-human-oReAlk2019_Mascot_2019-10-14 16:08:34	Protein Search
639.336	0.943349	1277.66	1277.66	34.9 (M.expect:0.0,M.score:34.9)	433 - 442	R.WLNTPNTYLR.V	76114	ADDB_HUMAN	Beta-adducin OS=Homo sapiens OX=9606 GN=ADD2 PE=1 SV=3	1163		TRUE	7135	1276.66	639.335	1276.66	2	0.000603117	0.00120623	0.944093	14.8119	0.00607202	21.3443	0.0111226	40.2969	1	1		1	21.6953	0				CID	/Neuroblastom-Imaging/Imaging-Sample1/ZW_Neuroblastom_E22965-08_3_RA3_01_4008.d/+MS2(639.3361), 33.0eV, 40.3min #11286	ZW_Neuroblastom_E22965-08_3_RA3_01_4008.d	SwissProt-human-oReAlk2019_Mascot_2019-10-14 16:08:34	Protein Search
799.941	0.407059	1598.88	1598.87	28.0 (M.expect:0.0,M.score:28.0)	512 - 527	K.SAGPQSQLLASVIAEK.S	39434	ADDB_HUMAN	Beta-adducin OS=Homo sapiens OX=9606 GN=ADD2 PE=1 SV=3	2283		TRUE	10429	1597.87	799.941	1597.87	2	0.000325623	0.000651247	0.407315	6.02974	0.00325954	12.8857	0.0136991	47.6564	1	1		1	15.5746	0				CID	/Neuroblastom-Imaging/Imaging-Sample1/ZW_Neuroblastom_E22965-08_3_RA3_01_4008.d/+MS2(799.9414), 45.0eV, 47.7min #13392	ZW_Neuroblastom_E22965-08_3_RA3_01_4008.d	SwissProt-human-oReAlk2019_Mascot_2019-10-14 16:08:34	Protein Search
790.372	-3.50513	1579.74	1579.74	16.0 (M.expect:0.0,M.score:16.0)	1 - 13	-.MDVGELLSYQPNR.G	9028	CTBL1_HUMAN	Beta-catenin-like protein 1 OS=Homo sapiens OX=9606 GN=CTNNBL1 PE=1 SV=1	2218		TRUE	15578	1578.73	790.375	1578.73	2	-0.00277036	-0.00554071	-3.50736	3.89501	0.00381551	5.32651	0.0046876	58.7105	1	1		1	9.14479	0	Acetyl: 1; Oxidation: 1			CID	/Neuroblastom-Imaging/Imaging-Sample1/ZW_Neuroblastom_E22965-08_3_RA3_01_4008.d/+MS2(790.3719), 43.8eV, 58.7min #16314	ZW_Neuroblastom_E22965-08_3_RA3_01_4008.d	SwissProt-human-oReAlk2019_Mascot_2019-10-14 16:08:34	Protein Search
925.457	-2.28586	1849.91	1849.91	30.8 (M.expect:0.0,M.score:30.8)	1 - 16	-.MDVGELLSYQPNRGTK.R	14454	CTBL1_HUMAN	Beta-catenin-like protein 1 OS=Homo sapiens OX=9606 GN=CTNNBL1 PE=1 SV=1	3074		TRUE	13700	1848.9	925.459	1848.9	2	-0.00211546	-0.00423093	-2.2871	14.8602	0.0165171	22.0393	0.0207946	56.5447	1	1		1	14.6216	1	Acetyl: 1			CID	/Neuroblastom-Imaging/Imaging-Sample1/ZW_Neuroblastom_E22965-08_3_RA3_01_4008.d/+MS2(925.4572), 51.3eV, 56.6min #15771	ZW_Neuroblastom_E22965-08_3_RA3_01_4008.d	SwissProt-human-oReAlk2019_Mascot_2019-10-14 16:08:34	Protein Search
804.387	-3.96584	1607.77	1607.77	20.0 (M.expect:0.0,M.score:20.0)	50 - 64	R.DVSELTGFPEMLGGR.V	8320	PUR9_HUMAN	Bifunctional purine biosynthesis protein PURH OS=Homo sapiens OX=9606 GN=ATIC PE=1 SV=3	2305		TRUE	15812	1606.76	804.39	1606.77	2	-0.00319007	-0.00638015	-3.96833	9.91867	0.00968463	38.5963	0.0176385	62.4543	3	1		1	22.6953	0				CID	/Neuroblastom-Imaging/Imaging-Sample1/ZW_Neuroblastom_E22965-08_3_RA3_01_4008.d/+MS2(804.3871), 45.2eV, 62.5min #17193	ZW_Neuroblastom_E22965-08_3_RA3_01_4008.d	SwissProt-human-oReAlk2019_Mascot_2019-10-14 16:08:34	Protein Search
804.389	-1.67839	1607.77	1607.77	34.8 (M.expect:0.0,M.score:34.8)	50 - 64	R.DVSELTGFPEMLGGR.V	25168	PUR9_HUMAN	Bifunctional purine biosynthesis protein PURH OS=Homo sapiens OX=9606 GN=ATIC PE=1 SV=3	2306		TRUE	14429	1606.76	804.39	1606.77	2	-0.00135007	-0.00270015	-1.67944	10.1366	0.00599239	13.2729	0.00706547	62.5286	3	1		1	29.0358	0				CID	/Neuroblastom-Imaging/Imaging-Sample1/ZW_Neuroblastom_E22965-08_3_RA3_01_4008.d/+MS2(804.3890), 45.2eV, 62.5min #17207	ZW_Neuroblastom_E22965-08_3_RA3_01_4008.d	SwissProt-human-oReAlk2019_Mascot_2019-10-14 16:08:34	Protein Search
804.391	0.347997	1607.77	1607.77	43.4 (M.expect:0.0,M.score:43.4)	50 - 64	R.DVSELTGFPEMLGGR.V	14574	PUR9_HUMAN	Bifunctional purine biosynthesis protein PURH OS=Homo sapiens OX=9606 GN=ATIC PE=1 SV=3	2307		TRUE	14667	1606.77	804.39	1606.77	2	0.000279925	0.000559851	0.348215	4.44647	0.00269314	5.01011	0.003218	62.4891	3	1		1	28.001	0				CID	/Neuroblastom-Imaging/Imaging-Sample1/ZW_Neuroblastom_E22965-08_3_RA3_01_4008.d/+MS2(804.3906), 45.2eV, 62.5min #17200	ZW_Neuroblastom_E22965-08_3_RA3_01_4008.d	SwissProt-human-oReAlk2019_Mascot_2019-10-14 16:08:34	Protein Search
345.701	1.86206	690.395	690.393	13.9 (M.expect:0.0,M.score:13.9)	133 - 138	K.AFSPLR.K	44286	PGS1_HUMAN	Biglycan OS=Homo sapiens OX=9606 GN=BGN PE=1 SV=2	5		TRUE	13980	689.387	345.7	689.386	2	0.000643717	0.00128743	1.86478	17.3144	0.00488798	37.9575	0.0145921	24.2149	1	1		1	22.8437	0				CID	/Neuroblastom-Imaging/Imaging-Sample1/ZW_Neuroblastom_E22965-08_3_RA3_01_4008.d/+MS2(345.7010), 23.0eV, 24.2min #5762	ZW_Neuroblastom_E22965-08_3_RA3_01_4008.d	SwissProt-human-oReAlk2019_Mascot_2019-10-14 16:08:34	Protein Search
463.272	0.555446	925.536	925.535	20.7 (M.expect:0.0,M.score:20.7)	292 - 300	R.VPSGLPDLK.L	144336	PGS1_HUMAN	Biglycan OS=Homo sapiens OX=9606 GN=BGN PE=1 SV=2	188		TRUE	11969	924.529	463.271	924.528	2	0.000257323	0.000514645	0.556051	4.61257	0.00298807	41.4486	0.0120504	33.9646	1	1		1	23.9182	0				CID	/Neuroblastom-Imaging/Imaging-Sample1/ZW_Neuroblastom_E22965-08_3_RA3_01_4008.d/+MS2(463.2716), 25.5eV, 34.0min #9207	ZW_Neuroblastom_E22965-08_3_RA3_01_4008.d	SwissProt-human-oReAlk2019_Mascot_2019-10-14 16:08:34	Protein Search
676.382	1.9446	2027.13	2027.13	27.5 (M.expect:0.0,M.score:27.5)	148 - 165	K.NHLVEIPPNLPSSLVELR.I	10922	PGS1_HUMAN	Biglycan OS=Homo sapiens OX=9606 GN=BGN PE=1 SV=2	3460		TRUE	12131	2026.13	676.381	2026.12	3	0.00131529	0.00394587	1.94653	13.7448	0.00665359	17.3064	0.0110926	55.1195	1	1		1	26.3906	0				CID	/Neuroblastom-Imaging/Imaging-Sample1/ZW_Neuroblastom_E22965-08_3_RA3_01_4008.d/+MS2(676.3823), 27.0eV, 55.1min #15393	ZW_Neuroblastom_E22965-08_3_RA3_01_4008.d	SwissProt-human-oReAlk2019_Mascot_2019-10-14 16:08:34	Protein Search
762.719	-1.40474	2286.14	2286.15	28.5 (M.expect:0.0,M.score:28.5)	87 - 106	K.EISPDTTLLDLQNNDISELR.K	5958	PGS1_HUMAN	Biglycan OS=Homo sapiens OX=9606 GN=BGN PE=1 SV=2	3737		TRUE	16185	2285.14	762.72	2285.14	3	-0.00107142	-0.00321427	-1.40598	10.9424	0.00969882	14.1887	0.0115801	61.1121	1	1		1	16.6667	0				CID	/Neuroblastom-Imaging/Imaging-Sample1/ZW_Neuroblastom_E22965-08_3_RA3_01_4008.d/+MS2(762.7191), 35.2eV, 61.1min #16897	ZW_Neuroblastom_E22965-08_3_RA3_01_4008.d	SwissProt-human-oReAlk2019_Mascot_2019-10-14 16:08:34	Protein Search
693.842	1.67764	1386.68	1386.67	33.1 (M.expect:0.0,M.score:33.1)	185 - 198	K.ETPAATEAPSSTPK.A	335372	BASP1_HUMAN	Brain acid soluble protein 1 OS=Homo sapiens OX=9606 GN=BASP1 PE=1 SV=2	1577		TRUE	4746	1385.67	693.841	1385.67	2	0.00116402	0.00232804	1.67886	3.25015	0.00200179	4.73089	0.00228126	17.2573	2	1		1	48.8432	0				CID	/Neuroblastom-Imaging/Imaging-Sample1/ZW_Neuroblastom_E22965-08_3_RA3_01_4008.d/+MS2(693.8422), 33.0eV, 17.3min #3259	ZW_Neuroblastom_E22965-08_3_RA3_01_4008.d	SwissProt-human-oReAlk2019_Mascot_2019-10-14 16:08:34	Protein Search
693.843	2.57121	1386.68	1386.67	54.2 (M.expect:0.0,M.score:54.2)	185 - 198	K.ETPAATEAPSSTPK.A	108070	BASP1_HUMAN	Brain acid soluble protein 1 OS=Homo sapiens OX=9606 GN=BASP1 PE=1 SV=2	1578		TRUE	8224	1385.67	693.841	1385.67	2	0.00178402	0.00356804	2.57308	6.75057	0.00339698	8.828	0.00564868	17.1062	2	1		1	39.0316	0				CID	/Neuroblastom-Imaging/Imaging-Sample1/ZW_Neuroblastom_E22965-08_3_RA3_01_4008.d/+MS2(693.8428), 33.0eV, 17.1min #3217	ZW_Neuroblastom_E22965-08_3_RA3_01_4008.d	SwissProt-human-oReAlk2019_Mascot_2019-10-14 16:08:34	Protein Search
879.416	0.275527	2636.23	2636.23	16.4 (M.expect:0.0,M.score:16.4)	122 - 149	K.AAEAAAAPAESAAPAAGEEPSKEEGEPK.K	143952	BASP1_HUMAN	Brain acid soluble protein 1 OS=Homo sapiens OX=9606 GN=BASP1 PE=1 SV=2	3870		TRUE	4943	2635.23	879.416	2635.22	3	0.000242303	0.000726908	0.275737	3.54924	0.00331977	12.0803	0.00858902	23.3657	1	1		1	20.5545	1				CID	/Neuroblastom-Imaging/Imaging-Sample1/ZW_Neuroblastom_E22965-08_3_RA3_01_4008.d/+MS2(879.4158), 44.0eV, 23.4min #5434	ZW_Neuroblastom_E22965-08_3_RA3_01_4008.d	SwissProt-human-oReAlk2019_Mascot_2019-10-14 16:08:34	Protein Search
921.799	0.561933	2763.38	2763.38	29.7 (M.expect:0.0,M.score:29.7)	199 - 226	K.AQGPAASAEEPKPVEAPAANSDQTVTVK.E	110398	BASP1_HUMAN	Brain acid soluble protein 1 OS=Homo sapiens OX=9606 GN=BASP1 PE=1 SV=2	3892		TRUE	5901	2762.37	921.798	2762.37	3	0.000517989	0.00155397	0.562343	6.2343	0.0037093	7.47362	0.00515186	29.2746	2	1		1	16.5084	0				CID	/Neuroblastom-Imaging/Imaging-Sample1/ZW_Neuroblastom_E22965-08_3_RA3_01_4008.d/+MS2(921.7986), 46.1eV, 29.3min #7588	ZW_Neuroblastom_E22965-08_3_RA3_01_4008.d	SwissProt-human-oReAlk2019_Mascot_2019-10-14 16:08:34	Protein Search
921.799	0.594479	2763.38	2763.38	35.4 (M.expect:0.0,M.score:35.4)	199 - 226	K.AQGPAASAEEPKPVEAPAANSDQTVTVK.E	35188	BASP1_HUMAN	Brain acid soluble protein 1 OS=Homo sapiens OX=9606 GN=BASP1 PE=1 SV=2	3893		TRUE	1484	2762.37	921.798	2762.37	3	0.000547989	0.00164397	0.594912	5.4992	0.00431891	8.43216	0.00815724	29.2305	2	1		1	14.491	0				CID	/Neuroblastom-Imaging/Imaging-Sample1/ZW_Neuroblastom_E22965-08_3_RA3_01_4008.d/+MS2(921.7986), 46.1eV, 29.2min #7578	ZW_Neuroblastom_E22965-08_3_RA3_01_4008.d	SwissProt-human-oReAlk2019_Mascot_2019-10-14 16:08:34	Protein Search
964.812	0.197231	2892.42	2892.42	14.5 (M.expect:0.0,M.score:14.5)	199 - 227	K.AQGPAASAEEPKPVEAPAANSDQTVTVKE.-	71028	BASP1_HUMAN	Brain acid soluble protein 1 OS=Homo sapiens OX=9606 GN=BASP1 PE=1 SV=2	3928		TRUE	3204	2891.42	964.812	2891.41	3	0.000190291	0.000570872	0.197368	8.74096	0.00733874	23.0181	0.0153099	30.4721	2	1		1	7.97212	1				CID	/Neuroblastom-Imaging/Imaging-Sample1/ZW_Neuroblastom_E22965-08_3_RA3_01_4008.d/+MS2(964.8124), 48.3eV, 30.5min #7995	ZW_Neuroblastom_E22965-08_3_RA3_01_4008.d	SwissProt-human-oReAlk2019_Mascot_2019-10-14 16:08:34	Protein Search
964.813	0.518537	2892.42	2892.42	35.9 (M.expect:0.0,M.score:35.9)	199 - 227	K.AQGPAASAEEPKPVEAPAANSDQTVTVKE.-	94700	BASP1_HUMAN	Brain acid soluble protein 1 OS=Homo sapiens OX=9606 GN=BASP1 PE=1 SV=2	3929		TRUE	3815	2891.42	964.812	2891.41	3	0.000500291	0.00150087	0.518898	9.02624	0.0107154	18.5554	0.0141884	30.3653	2	1		1	14.1084	1				CID	/Neuroblastom-Imaging/Imaging-Sample1/ZW_Neuroblastom_E22965-08_3_RA3_01_4008.d/+MS2(964.8127), 48.3eV, 30.4min #7956	ZW_Neuroblastom_E22965-08_3_RA3_01_4008.d	SwissProt-human-oReAlk2019_Mascot_2019-10-14 16:08:34	Protein Search
592.368	-1.05346	1183.73	1183.73	21.7 (M.expect:0.0,M.score:21.7)	29 - 39	K.DLIVTPATILK.E	12770	BCAT1_HUMAN	Branched-chain-amino-acid aminotransferase, cytosolic OS=Homo sapiens OX=9606 GN=BCAT1 PE=1 SV=3	804		TRUE	15041	1182.72	592.368	1182.72	2	-0.000624033	-0.00124807	-1.05435	6.70179	0.00360793	7.60017	0.00542375	58.212	2	1		1	13.5876	0				CID	/Neuroblastom-Imaging/Imaging-Sample1/ZW_Neuroblastom_E22965-08_3_RA3_01_4008.d/+MS2(592.3678), 32.5eV, 58.2min #16199	ZW_Neuroblastom_E22965-08_3_RA3_01_4008.d	SwissProt-human-oReAlk2019_Mascot_2019-10-14 16:08:34	Protein Search
592.37	1.8839	1183.73	1183.73	30.0 (M.expect:0.0,M.score:30.0)	29 - 39	K.DLIVTPATILK.E	10096	BCAT1_HUMAN	Branched-chain-amino-acid aminotransferase, cytosolic OS=Homo sapiens OX=9606 GN=BCAT1 PE=1 SV=3	805		TRUE	14118	1182.72	592.368	1182.72	2	0.00111597	0.00223193	1.88551	8.29407	0.00475724	9.14285	0.00641643	58.0949	2	1		1	15.7101	0				CID	/Neuroblastom-Imaging/Imaging-Sample1/ZW_Neuroblastom_E22965-08_3_RA3_01_4008.d/+MS2(592.3696), 32.5eV, 58.1min #16166	ZW_Neuroblastom_E22965-08_3_RA3_01_4008.d	SwissProt-human-oReAlk2019_Mascot_2019-10-14 16:08:34	Protein Search
747.876	-1.49956	1494.75	1494.75	33.4 (M.expect:0.0,M.score:33.4)	116 - 127	R.EAEYFELPELVR.R	76968	KCD12_HUMAN	BTB/POZ domain-containing protein KCTD12 OS=Homo sapiens OX=9606 GN=KCTD12 PE=1 SV=1	1914		TRUE	13748	1493.74	747.877	1493.74	2	-0.00112149	-0.00224297	-1.50057	6.28256	0.00343485	50.2721	0.00934219	58.9615	6	1		1	35.6747	0				CID	/Neuroblastom-Imaging/Imaging-Sample1/ZW_Neuroblastom_E22965-08_3_RA3_01_4008.d/+MS2(747.8763), 38.7eV, 59.0min #16382	ZW_Neuroblastom_E22965-08_3_RA3_01_4008.d	SwissProt-human-oReAlk2019_Mascot_2019-10-14 16:08:34	Protein Search
747.877	-1.08506	1494.75	1494.75	49.5 (M.expect:0.0,M.score:49.5)	116 - 127	R.EAEYFELPELVR.R	80590	KCD12_HUMAN	BTB/POZ domain-containing protein KCTD12 OS=Homo sapiens OX=9606 GN=KCTD12 PE=1 SV=1	1915		TRUE	11612	1493.74	747.877	1493.74	2	-0.000811487	-0.00162297	-1.08579	6.97444	0.00465726	9.09602	0.00595994	58.8501	6	1		1	40.4154	0				CID	/Neuroblastom-Imaging/Imaging-Sample1/ZW_Neuroblastom_E22965-08_3_RA3_01_4008.d/+MS2(747.8766), 38.7eV, 58.9min #16348	ZW_Neuroblastom_E22965-08_3_RA3_01_4008.d	SwissProt-human-oReAlk2019_Mascot_2019-10-14 16:08:34	Protein Search
747.877	-0.737404	1494.75	1494.75	36.7 (M.expect:0.0,M.score:36.7)	116 - 127	R.EAEYFELPELVR.R	26476	KCD12_HUMAN	BTB/POZ domain-containing protein KCTD12 OS=Homo sapiens OX=9606 GN=KCTD12 PE=1 SV=1	1916		TRUE	14474	1493.74	747.877	1493.74	2	-0.000551487	-0.00110297	-0.737901	3.71339	0.00237775	4.07507	0.00292656	59.0632	6	1		1	27.0824	0				CID	/Neuroblastom-Imaging/Imaging-Sample1/ZW_Neuroblastom_E22965-08_3_RA3_01_4008.d/+MS2(747.8768), 38.7eV, 59.1min #16408	ZW_Neuroblastom_E22965-08_3_RA3_01_4008.d	SwissProt-human-oReAlk2019_Mascot_2019-10-14 16:08:34	Protein Search
747.877	-0.683919	1494.75	1494.75	56.3 (M.expect:0.0,M.score:56.3)	116 - 127	R.EAEYFELPELVR.R	119416	KCD12_HUMAN	BTB/POZ domain-containing protein KCTD12 OS=Homo sapiens OX=9606 GN=KCTD12 PE=1 SV=1	1917		TRUE	13656	1493.74	747.877	1493.74	2	-0.000511487	-0.00102297	-0.68438	10.9107	0.00851637	12.2815	0.0117099	58.9064	6	1		1	36.1769	0				CID	/Neuroblastom-Imaging/Imaging-Sample1/ZW_Neuroblastom_E22965-08_3_RA3_01_4008.d/+MS2(747.8769), 38.7eV, 58.9min #16365	ZW_Neuroblastom_E22965-08_3_RA3_01_4008.d	SwissProt-human-oReAlk2019_Mascot_2019-10-14 16:08:34	Protein Search
747.877	-0.429867	1494.75	1494.75	40.7 (M.expect:0.0,M.score:40.7)	116 - 127	R.EAEYFELPELVR.R	40860	KCD12_HUMAN	BTB/POZ domain-containing protein KCTD12 OS=Homo sapiens OX=9606 GN=KCTD12 PE=1 SV=1	1918		TRUE	14229	1493.74	747.877	1493.74	2	-0.000321487	-0.000642975	-0.430156	5.56716	0.00310413	7.50047	0.00496076	59.0126	6	1		1	32.6647	0				CID	/Neuroblastom-Imaging/Imaging-Sample1/ZW_Neuroblastom_E22965-08_3_RA3_01_4008.d/+MS2(747.8771), 38.7eV, 59.0min #16395	ZW_Neuroblastom_E22965-08_3_RA3_01_4008.d	SwissProt-human-oReAlk2019_Mascot_2019-10-14 16:08:34	Protein Search
747.877	-0.189185	1494.75	1494.75	40.8 (M.expect:0.0,M.score:40.8)	116 - 127	R.EAEYFELPELVR.R	19640	KCD12_HUMAN	BTB/POZ domain-containing protein KCTD12 OS=Homo sapiens OX=9606 GN=KCTD12 PE=1 SV=1	1919		TRUE	12268	1493.74	747.877	1493.74	2	-0.000141487	-0.000282975	-0.189313	4.64844	0.00278293	5.27122	0.00390186	58.8055	6	1		1	35.3087	0				CID	/Neuroblastom-Imaging/Imaging-Sample1/ZW_Neuroblastom_E22965-08_3_RA3_01_4008.d/+MS2(747.8772), 38.7eV, 58.8min #16337	ZW_Neuroblastom_E22965-08_3_RA3_01_4008.d	SwissProt-human-oReAlk2019_Mascot_2019-10-14 16:08:34	Protein Search
550.955	1.20974	1650.85	1650.85	34.3 (M.expect:0.0,M.score:34.3)	116 - 128	R.EAEYFELPELVRR.L	32588	KCD12_HUMAN	BTB/POZ domain-containing protein KCTD12 OS=Homo sapiens OX=9606 GN=KCTD12 PE=1 SV=1	2531		TRUE	8627	1649.84	550.954	1649.84	3	0.000666515	0.00199954	1.21122	10.015	0.0068818	25.4263	0.0164511	49.5508	1	1		1	22.7066	1				CID	/Neuroblastom-Imaging/Imaging-Sample1/ZW_Neuroblastom_E22965-08_3_RA3_01_4008.d/+MS2(550.9550), 26.0eV, 49.6min #13898	ZW_Neuroblastom_E22965-08_3_RA3_01_4008.d	SwissProt-human-oReAlk2019_Mascot_2019-10-14 16:08:34	Protein Search
849.763	-3.58353	2547.27	2547.28	16.1 (M.expect:0.0,M.score:16.1)	2 - 25	M.SSEPPPPPQPPTHQASVGLLDTPR.S	77884	CHSP1_HUMAN	Calcium-regulated heat-stable protein 1 OS=Homo sapiens OX=9606 GN=CARHSP1 PE=1 SV=2	3850		TRUE	10875	2546.27	849.766	2546.28	3	-0.00304516	-0.00913547	-3.58637	7.77838	0.00649503	12.8574	0.0124454	45.6081	1	1		1	26.8119	0	Acetyl: 1			CID	/Neuroblastom-Imaging/Imaging-Sample1/ZW_Neuroblastom_E22965-08_3_RA3_01_4008.d/+MS2(849.7631), 42.5eV, 45.6min #12809	ZW_Neuroblastom_E22965-08_3_RA3_01_4008.d	SwissProt-human-oReAlk2019_Mascot_2019-10-14 16:08:34	Protein Search
516.254	0.100327	1031.5	1031.5	20.7 (M.expect:0.0,M.score:20.7)	578 - 585	K.VLEEEEQR.R	210410	CALD1_HUMAN	Caldesmon OS=Homo sapiens OX=9606 GN=CALD1 PE=1 SV=3	399		TRUE	3601	1030.49	516.254	1030.49	2	5.17942e-05	0.000103588	0.100425	5.29189	0.00239091	6.98599	0.0032227	14.7323	1	1		1	20.0202	0				CID	/Neuroblastom-Imaging/Imaging-Sample1/ZW_Neuroblastom_E22965-08_3_RA3_01_4008.d/+MS2(516.2539), 28.0eV, 14.7min #2491	ZW_Neuroblastom_E22965-08_3_RA3_01_4008.d	SwissProt-human-oReAlk2019_Mascot_2019-10-14 16:08:34	Protein Search
671.325	0.301754	1341.64	1341.64	58.6 (M.expect:0.0,M.score:58.6)	160 - 170	R.YEIEETETVTK.S	73884	CALD1_HUMAN	Caldesmon OS=Homo sapiens OX=9606 GN=CALD1 PE=1 SV=3	1401		TRUE	1320	1340.64	671.325	1340.63	2	0.000202575	0.00040515	0.30198	3.17342	0.00209397	3.48186	0.00235889	27.3088	2	1		1	25.7814	0				CID	/Neuroblastom-Imaging/Imaging-Sample1/ZW_Neuroblastom_E22965-08_3_RA3_01_4008.d/+MS2(671.3248), 33.0eV, 27.3min #6905	ZW_Neuroblastom_E22965-08_3_RA3_01_4008.d	SwissProt-human-oReAlk2019_Mascot_2019-10-14 16:08:34	Protein Search
671.326	1.5977	1341.64	1341.64	53.9 (M.expect:0.0,M.score:53.9)	160 - 170	R.YEIEETETVTK.S	377954	CALD1_HUMAN	Caldesmon OS=Homo sapiens OX=9606 GN=CALD1 PE=1 SV=3	1402		TRUE	3041	1340.64	671.325	1340.63	2	0.00107257	0.00214515	1.5989	2.78722	0.00188866	3.7376	0.00389922	27.3548	2	1		1	36.0509	0				CID	/Neuroblastom-Imaging/Imaging-Sample1/ZW_Neuroblastom_E22965-08_3_RA3_01_4008.d/+MS2(671.3257), 33.0eV, 27.4min #6918	ZW_Neuroblastom_E22965-08_3_RA3_01_4008.d	SwissProt-human-oReAlk2019_Mascot_2019-10-14 16:08:34	Protein Search
700.867	-0.17659	1400.73	1400.73	43.1 (M.expect:0.0,M.score:43.1)	558 - 569	K.QQEAALELEELK.K	97474	CALD1_HUMAN	Caldesmon OS=Homo sapiens OX=9606 GN=CALD1 PE=1 SV=3	1637		TRUE	9498	1399.72	700.867	1399.72	2	-0.000123766	-0.000247533	-0.176717	5.40113	0.00259356	7.53136	0.00579877	39.7274	1	1		1	39.2982	0				CID	/Neuroblastom-Imaging/Imaging-Sample1/ZW_Neuroblastom_E22965-08_3_RA3_01_4008.d/+MS2(700.8669), 33.1eV, 39.7min #11102	ZW_Neuroblastom_E22965-08_3_RA3_01_4008.d	SwissProt-human-oReAlk2019_Mascot_2019-10-14 16:08:34	Protein Search
874.938	-0.547071	1748.87	1748.87	55.0 (M.expect:0.0,M.score:55.0)	120 - 135	K.EFDPTITDASLSLPSR.R	147374	CALD1_HUMAN	Caldesmon OS=Homo sapiens OX=9606 GN=CALD1 PE=1 SV=3	2840		TRUE	11160	1747.86	874.939	1747.86	2	-0.000478653	-0.000957306	-0.547386	7.62008	0.00489336	19.9166	0.00677383	53.927	2	1		1	24.2841	0				CID	/Neuroblastom-Imaging/Imaging-Sample1/ZW_Neuroblastom_E22965-08_3_RA3_01_4008.d/+MS2(874.9382), 48.7eV, 53.9min #15066	ZW_Neuroblastom_E22965-08_3_RA3_01_4008.d	SwissProt-human-oReAlk2019_Mascot_2019-10-14 16:08:34	Protein Search
874.939	0.138692	1748.87	1748.87	57.3 (M.expect:0.0,M.score:57.3)	120 - 135	K.EFDPTITDASLSLPSR.R	29828	CALD1_HUMAN	Caldesmon OS=Homo sapiens OX=9606 GN=CALD1 PE=1 SV=3	2841		TRUE	8806	1747.86	874.939	1747.86	2	0.000121347	0.000242694	0.138772	10.2177	0.00676555	12.643	0.00732386	53.8824	2	1		1	20.0298	0				CID	/Neuroblastom-Imaging/Imaging-Sample1/ZW_Neuroblastom_E22965-08_3_RA3_01_4008.d/+MS2(874.9388), 48.8eV, 53.9min #15056	ZW_Neuroblastom_E22965-08_3_RA3_01_4008.d	SwissProt-human-oReAlk2019_Mascot_2019-10-14 16:08:34	Protein Search
635.662	0.521878	1904.97	1904.97	17.2 (M.expect:0.0,M.score:17.2)	120 - 136	K.EFDPTITDASLSLPSRR.M	92556	CALD1_HUMAN	Caldesmon OS=Homo sapiens OX=9606 GN=CALD1 PE=1 SV=3	3160		TRUE	6806	1903.96	635.662	1903.96	3	0.000331738	0.000995214	0.522429	7.61516	0.0045617	14.8913	0.0103007	45.3152	2	1		1	14.3256	1				CID	/Neuroblastom-Imaging/Imaging-Sample1/ZW_Neuroblastom_E22965-08_3_RA3_01_4008.d/+MS2(635.6623), 33.0eV, 45.3min #12736	ZW_Neuroblastom_E22965-08_3_RA3_01_4008.d	SwissProt-human-oReAlk2019_Mascot_2019-10-14 16:08:34	Protein Search
635.663	0.978094	1904.97	1904.97	54.5 (M.expect:0.0,M.score:54.5)	120 - 136	K.EFDPTITDASLSLPSRR.M	157932	CALD1_HUMAN	Caldesmon OS=Homo sapiens OX=9606 GN=CALD1 PE=1 SV=3	3161		TRUE	3767	1903.97	635.662	1903.96	3	0.000621738	0.00186521	0.979129	4.20997	0.00237417	5.40769	0.0037478	45.0993	2	1		1	54.9976	1				CID	/Neuroblastom-Imaging/Imaging-Sample1/ZW_Neuroblastom_E22965-08_3_RA3_01_4008.d/+MS2(635.6625), 27.0eV, 45.1min #12675	ZW_Neuroblastom_E22965-08_3_RA3_01_4008.d	SwissProt-human-oReAlk2019_Mascot_2019-10-14 16:08:34	Protein Search
683.021	1.64838	2047.05	2047.05	19.8 (M.expect:0.0,M.score:19.8)	719 - 739	K.GNVFSSPTAAGTPNKETAGLK.V	166136	CALD1_HUMAN	Caldesmon OS=Homo sapiens OX=9606 GN=CALD1 PE=1 SV=3	3485		TRUE	4339	2046.04	683.02	2046.04	3	0.00112588	0.00337764	1.65	3.95111	0.00235453	12.0074	0.0100464	28.7542	1	1		1	44.0989	1				CID	/Neuroblastom-Imaging/Imaging-Sample1/ZW_Neuroblastom_E22965-08_3_RA3_01_4008.d/+MS2(683.0211), 27.0eV, 28.8min #7406	ZW_Neuroblastom_E22965-08_3_RA3_01_4008.d	SwissProt-human-oReAlk2019_Mascot_2019-10-14 16:08:34	Protein Search
699.991	0.971029	2097.96	2097.96	65.3 (M.expect:0.0,M.score:65.3)	81 - 99	K.TTTTNTQVEGDDEAAFLER.L	83254	CALD1_HUMAN	Caldesmon OS=Homo sapiens OX=9606 GN=CALD1 PE=1 SV=3	3585		TRUE	8110	2096.95	699.991	2096.95	3	0.000679712	0.00203914	0.971961	4.77906	0.00445007	8.35773	0.00679889	38.179	2	1		1	21.4945	0				CID	/Neuroblastom-Imaging/Imaging-Sample1/ZW_Neuroblastom_E22965-08_3_RA3_01_4008.d/+MS2(699.9912), 27.0eV, 38.2min #10617	ZW_Neuroblastom_E22965-08_3_RA3_01_4008.d	SwissProt-human-oReAlk2019_Mascot_2019-10-14 16:08:34	Protein Search
1049.48	0.383802	2097.96	2097.96	76.2 (M.expect:0.0,M.score:76.2)	81 - 99	K.TTTTNTQVEGDDEAAFLER.L	233270	CALD1_HUMAN	Caldesmon OS=Homo sapiens OX=9606 GN=CALD1 PE=1 SV=3	3586		TRUE	7714	2096.95	1049.48	2096.95	2	0.000402794	0.000805588	0.383987	7.23765	0.00583257	16.6982	0.00877495	38.1251	2	1		1	19.0427	0				CID	/Neuroblastom-Imaging/Imaging-Sample1/ZW_Neuroblastom_E22965-08_3_RA3_01_4008.d/+MS2(1049.4826), 60.0eV, 38.1min #10600	ZW_Neuroblastom_E22965-08_3_RA3_01_4008.d	SwissProt-human-oReAlk2019_Mascot_2019-10-14 16:08:34	Protein Search
633.311	1.90102	1265.61	1265.61	51.9 (M.expect:0.0,M.score:51.9)	96 - 107	K.DGNGYISAAELR.H	103714	CALM1_HUMAN	Calmodulin-1 OS=Homo sapiens OX=9606 GN=CALM1 PE=1 SV=1	1085		TRUE	8933	1264.61	633.31	1264.6	2	0.00120394	0.00240787	1.90253	11.2144	0.00671118	15.0929	0.00817947	37.1927	1	1		1	26.1629	0				CID	/Neuroblastom-Imaging/Imaging-Sample1/ZW_Neuroblastom_E22965-08_3_RA3_01_4008.d/+MS2(633.3109), 33.0eV, 37.2min #10291	ZW_Neuroblastom_E22965-08_3_RA3_01_4008.d	SwissProt-human-oReAlk2019_Mascot_2019-10-14 16:08:34	Protein Search
782.379	-1.47683	1563.75	1563.75	32.3 (M.expect:0.0,M.score:32.3)	2 - 14	M.ADQLTEEQIAEFK.E	117012	CALM1_HUMAN	Calmodulin-1 OS=Homo sapiens OX=9606 GN=CALM1 PE=1 SV=1	2150		TRUE	14067	1562.74	782.38	1562.75	2	-0.00115544	-0.00231088	-1.47778	8.0603	0.00733646	11.6992	0.00925829	56.204	6	1		1	13.2837	0	Acetyl: 1			CID	/Neuroblastom-Imaging/Imaging-Sample1/ZW_Neuroblastom_E22965-08_3_RA3_01_4008.d/+MS2(782.3793), 42.9eV, 56.2min #15687	ZW_Neuroblastom_E22965-08_3_RA3_01_4008.d	SwissProt-human-oReAlk2019_Mascot_2019-10-14 16:08:34	Protein Search
782.38	-1.20842	1563.75	1563.75	27.2 (M.expect:0.0,M.score:27.2)	2 - 14	M.ADQLTEEQIAEFK.E	200630	CALM1_HUMAN	Calmodulin-1 OS=Homo sapiens OX=9606 GN=CALM1 PE=1 SV=1	2151		TRUE	12787	1562.74	782.38	1562.75	2	-0.000945439	-0.00189088	-1.20919	16.9667	0.00959997	29.7786	0.0125892	56.1529	6	1		1	23.4697	0	Acetyl: 1			CID	/Neuroblastom-Imaging/Imaging-Sample1/ZW_Neuroblastom_E22965-08_3_RA3_01_4008.d/+MS2(782.3795), 42.9eV, 56.2min #15673	ZW_Neuroblastom_E22965-08_3_RA3_01_4008.d	SwissProt-human-oReAlk2019_Mascot_2019-10-14 16:08:34	Protein Search
782.38	-1.00391	1563.75	1563.75	45.5 (M.expect:0.0,M.score:45.5)	2 - 14	M.ADQLTEEQIAEFK.E	62474	CALM1_HUMAN	Calmodulin-1 OS=Homo sapiens OX=9606 GN=CALM1 PE=1 SV=1	2152		TRUE	12656	1562.74	782.38	1562.75	2	-0.000785439	-0.00157088	-1.00456	8.26524	0.00474969	10.0314	0.00809334	56.2481	6	1		1	17.7317	0	Acetyl: 1			CID	/Neuroblastom-Imaging/Imaging-Sample1/ZW_Neuroblastom_E22965-08_3_RA3_01_4008.d/+MS2(782.3797), 42.9eV, 56.3min #15698	ZW_Neuroblastom_E22965-08_3_RA3_01_4008.d	SwissProt-human-oReAlk2019_Mascot_2019-10-14 16:08:34	Protein Search
782.38	-0.965566	1563.75	1563.75	21.7 (M.expect:0.0,M.score:21.7)	2 - 14	M.ADQLTEEQIAEFK.E	33690	CALM1_HUMAN	Calmodulin-1 OS=Homo sapiens OX=9606 GN=CALM1 PE=1 SV=1	2153		TRUE	13795	1562.74	782.38	1562.75	2	-0.000755439	-0.00151088	-0.966188	11.144	0.00777437	29.958	0.0139917	56.3069	6	1		1	15.0758	0	Acetyl: 1			CID	/Neuroblastom-Imaging/Imaging-Sample1/ZW_Neuroblastom_E22965-08_3_RA3_01_4008.d/+MS2(782.3797), 42.9eV, 56.3min #15716	ZW_Neuroblastom_E22965-08_3_RA3_01_4008.d	SwissProt-human-oReAlk2019_Mascot_2019-10-14 16:08:34	Protein Search
782.38	-0.927221	1563.75	1563.75	66.9 (M.expect:0.0,M.score:66.9)	2 - 14	M.ADQLTEEQIAEFK.E	41978	CALM1_HUMAN	Calmodulin-1 OS=Homo sapiens OX=9606 GN=CALM1 PE=1 SV=1	2154		TRUE	9291	1562.74	782.38	1562.75	2	-0.000725439	-0.00145088	-0.927819	6.01215	0.00372379	33.0043	0.0130982	56.0514	6	1		1	28.124	0	Acetyl: 1			CID	/Neuroblastom-Imaging/Imaging-Sample1/ZW_Neuroblastom_E22965-08_3_RA3_01_4008.d/+MS2(782.3798), 42.9eV, 56.1min #15644	ZW_Neuroblastom_E22965-08_3_RA3_01_4008.d	SwissProt-human-oReAlk2019_Mascot_2019-10-14 16:08:34	Protein Search
782.38	-0.49265	1563.75	1563.75	41.8 (M.expect:0.0,M.score:41.8)	2 - 14	M.ADQLTEEQIAEFK.E	148382	CALM1_HUMAN	Calmodulin-1 OS=Homo sapiens OX=9606 GN=CALM1 PE=1 SV=1	2155		TRUE	10387	1562.75	782.38	1562.75	2	-0.000385439	-0.000770878	-0.492967	10.1298	0.00830808	23.3467	0.012906	56.0831	6	1		1	25.3474	0	Acetyl: 1			CID	/Neuroblastom-Imaging/Imaging-Sample1/ZW_Neuroblastom_E22965-08_3_RA3_01_4008.d/+MS2(782.3801), 42.9eV, 56.1min #15647	ZW_Neuroblastom_E22965-08_3_RA3_01_4008.d	SwissProt-human-oReAlk2019_Mascot_2019-10-14 16:08:34	Protein Search
544.766	2.53307	1088.52	1088.52	42.0 (M.expect:0.0,M.score:42.0)	574 - 582	K.AEEDEILNR.S	258584	CALX_HUMAN	Calnexin OS=Homo sapiens OX=9606 GN=CANX PE=1 SV=2	543		TRUE	3203	1087.52	544.765	1087.51	2	0.00137993	0.00275986	2.53542	3.96427	0.00173797	4.89046	0.00355177	24.8904	1	1		1	21.0539	0				CID	/Neuroblastom-Imaging/Imaging-Sample1/ZW_Neuroblastom_E22965-08_3_RA3_01_4008.d/+MS2(544.7659), 29.7eV, 24.9min #6006	ZW_Neuroblastom_E22965-08_3_RA3_01_4008.d	SwissProt-human-oReAlk2019_Mascot_2019-10-14 16:08:34	Protein Search
523.768	2.08911	1046.53	1046.53	14.1 (M.expect:0.0,M.score:14.1)	36 - 44	R.EWIEGVTGR.R	54406	CNN1_HUMAN	Calponin-1 OS=Homo sapiens OX=9606 GN=CNN1 PE=1 SV=2	444		TRUE	5027	1045.52	523.767	1045.52	2	0.00109421	0.00218842	2.09112	4.45781	0.00178644	16.6324	0.0141459	34.7514	1	1		1	18.651	0				CID	/Neuroblastom-Imaging/Imaging-Sample1/ZW_Neuroblastom_E22965-08_3_RA3_01_4008.d/+MS2(523.7680), 28.4eV, 34.8min #9482	ZW_Neuroblastom_E22965-08_3_RA3_01_4008.d	SwissProt-human-oReAlk2019_Mascot_2019-10-14 16:08:34	Protein Search
546.291	0.835247	1091.57	1091.57	31.5 (M.expect:0.0,M.score:31.5)	9 - 19	R.GPAYGLSAEVK.N	213744	CNN1_HUMAN	Calponin-1 OS=Homo sapiens OX=9606 GN=CNN1 PE=1 SV=2	550		TRUE	6402	1090.57	546.29	1090.57	2	0.000456288	0.000912576	0.836018	10.9127	0.00632581	18.4837	0.00911443	27.8746	1	1		1	25.9855	0				CID	/Neuroblastom-Imaging/Imaging-Sample1/ZW_Neuroblastom_E22965-08_3_RA3_01_4008.d/+MS2(546.2907), 29.8eV, 27.9min #7092	ZW_Neuroblastom_E22965-08_3_RA3_01_4008.d	SwissProt-human-oReAlk2019_Mascot_2019-10-14 16:08:34	Protein Search
709.332	2.92452	1417.66	1417.65	33.6 (M.expect:0.0,M.score:33.6)	173 - 185	K.FASQQGMTAYGTR.R	108720	CNN1_HUMAN	Calponin-1 OS=Homo sapiens OX=9606 GN=CNN1 PE=1 SV=2	1676		TRUE	2308	1416.65	709.33	1416.65	2	0.00207446	0.00414892	2.9266	7.11004	0.00456937	9.02971	0.0057189	24.8408	1	1		1	14.9894	0				CID	/Neuroblastom-Imaging/Imaging-Sample1/ZW_Neuroblastom_E22965-08_3_RA3_01_4008.d/+MS2(709.3322), 34.2eV, 24.8min #5991	ZW_Neuroblastom_E22965-08_3_RA3_01_4008.d	SwissProt-human-oReAlk2019_Mascot_2019-10-14 16:08:34	Protein Search
971.48	-1.18594	1941.95	1941.96	27.5 (M.expect:0.0,M.score:27.5)	2 - 19	M.SSTQFNKGPSYGLSAEVK.N	42698	CNN2_HUMAN	Calponin-2 OS=Homo sapiens OX=9606 GN=CNN2 PE=1 SV=4	3325		TRUE	7149	1940.95	971.481	1940.95	2	-0.00115212	-0.00230423	-1.18655	7.49442	0.00717371	9.11688	0.00871415	37.301	1	1		1	16.919	1	Acetyl: 1			CID	/Neuroblastom-Imaging/Imaging-Sample1/ZW_Neuroblastom_E22965-08_3_RA3_01_4008.d/+MS2(971.4801), 53.6eV, 37.3min #10328	ZW_Neuroblastom_E22965-08_3_RA3_01_4008.d	SwissProt-human-oReAlk2019_Mascot_2019-10-14 16:08:34	Protein Search
470.24	1.08536	939.473	939.472	25.7 (M.expect:0.0,M.score:25.7)	257 - 265	K.GMSVYGLGR.Q	39980	CNN3_HUMAN	Calponin-3 OS=Homo sapiens OX=9606 GN=CNN3 PE=1 SV=1	207		TRUE	7318	938.465	470.239	938.464	2	0.00051038	0.00102076	1.08652	14.5273	0.00354512	43.621	0.0158931	31.9905	1	1		1	17.5503	0				CID	/Neuroblastom-Imaging/Imaging-Sample1/ZW_Neuroblastom_E22965-08_3_RA3_01_4008.d/+MS2(470.2400), 25.8eV, 32.0min #8524	ZW_Neuroblastom_E22965-08_3_RA3_01_4008.d	SwissProt-human-oReAlk2019_Mascot_2019-10-14 16:08:34	Protein Search
477.739	3.04133	954.471	954.468	13.2 (M.expect:0.0,M.score:13.2)	235 - 241	R.EQFVEFR.D	130916	CALU_HUMAN	Calumenin OS=Homo sapiens OX=9606 GN=CALU PE=1 SV=2	233		TRUE	9844	953.464	477.738	953.461	2	0.00145296	0.00290593	3.04454	18.4838	0.00820978	28.6124	0.0120242	33.036	1	1		1	24.9441	0				CID	/Neuroblastom-Imaging/Imaging-Sample1/ZW_Neuroblastom_E22965-08_3_RA3_01_4008.d/+MS2(477.7391), 26.1eV, 33.0min #8889	ZW_Neuroblastom_E22965-08_3_RA3_01_4008.d	SwissProt-human-oReAlk2019_Mascot_2019-10-14 16:08:34	Protein Search
698.313	3.37335	1395.62	1395.61	37.4 (M.expect:0.0,M.score:37.4)	485 - 497	K.GEEAAGYAQESQR.E	30990	CAMKV_HUMAN	CaM kinase-like vesicle-associated protein OS=Homo sapiens OX=9606 GN=CAMKV PE=2 SV=2	1616		TRUE	4264	1394.61	698.31	1394.61	2	0.00235566	0.00471131	3.37579	5.22897	0.00336737	5.93414	0.00425616	15.5144	1	1		1	15.8992	0				CID	/Neuroblastom-Imaging/Imaging-Sample1/ZW_Neuroblastom_E22965-08_3_RA3_01_4008.d/+MS2(698.3127), 33.0eV, 15.5min #2741	ZW_Neuroblastom_E22965-08_3_RA3_01_4008.d	SwissProt-human-oReAlk2019_Mascot_2019-10-14 16:08:34	Protein Search
415.461	-0.240707	1658.82	1658.82	17.8 (M.expect:0.0,M.score:17.8)	1,063 - 1,076	R.EENSGLLQELEELR.K	430274	CLIP1_HUMAN	CAP-Gly domain-containing linker protein 1 OS=Homo sapiens OX=9606 GN=CLIP1 PE=1 SV=2	2543		TRUE	10120	1657.82	415.461	1657.82	4	-0.000100004	-0.000400018	-0.241146	26.7813	0.0185603	36.1221	0.0249854	20.798	1	1		1	6.43196	0				CID	/Neuroblastom-Imaging/Imaging-Sample1/ZW_Neuroblastom_E22965-08_3_RA3_01_4008.d/+MS2(415.4612), 23.3eV, 20.8min #4479	ZW_Neuroblastom_E22965-08_3_RA3_01_4008.d	SwissProt-human-oReAlk2019_Mascot_2019-10-14 16:08:34	Protein Search
871.958	1.02556	1742.91	1742.91	24.9 (M.expect:0.0,M.score:24.9)	20 - 35	K.LYPIANGNNQSPVDIK.T	17440	CAH1_HUMAN	Carbonic anhydrase 1 OS=Homo sapiens OX=9606 GN=CA1 PE=1 SV=2	2804		TRUE	4576	1741.9	871.957	1741.9	2	0.000894243	0.00178849	1.02615	8.4112	0.0110738	19.888	0.0147204	40.0526	2	1		1	15.1232	0				CID	/Neuroblastom-Imaging/Imaging-Sample1/ZW_Neuroblastom_E22965-08_3_RA3_01_4008.d/+MS2(871.9581), 48.6eV, 40.1min #11207	ZW_Neuroblastom_E22965-08_3_RA3_01_4008.d	SwissProt-human-oReAlk2019_Mascot_2019-10-14 16:08:34	Protein Search
871.958	1.0829	1742.91	1742.91	53.0 (M.expect:0.0,M.score:53.0)	20 - 35	K.LYPIANGNNQSPVDIK.T	86412	CAH1_HUMAN	Carbonic anhydrase 1 OS=Homo sapiens OX=9606 GN=CA1 PE=1 SV=2	2805		TRUE	7629	1741.9	871.957	1741.9	2	0.000944243	0.00188849	1.08353	9.25341	0.00732756	11.5744	0.00958272	40.0911	2	1		1	15.9515	0				CID	/Neuroblastom-Imaging/Imaging-Sample1/ZW_Neuroblastom_E22965-08_3_RA3_01_4008.d/+MS2(871.9582), 48.6eV, 40.1min #11217	ZW_Neuroblastom_E22965-08_3_RA3_01_4008.d	SwissProt-human-oReAlk2019_Mascot_2019-10-14 16:08:34	Protein Search
585.266	2.8752	1169.53	1169.52	24.3 (M.expect:0.0,M.score:24.3)	172 - 181	K.SADFTNFDPR.G	64536	CAH2_HUMAN	Carbonic anhydrase 2 OS=Homo sapiens OX=9606 GN=CA2 PE=1 SV=2	765		TRUE	2614	1168.52	585.265	1168.51	2	0.00168276	0.00336551	2.87767	7.26425	0.00475433	16.852	0.0159585	35.6412	1	1		1	17.1447	0				CID	/Neuroblastom-Imaging/Imaging-Sample1/ZW_Neuroblastom_E22965-08_3_RA3_01_4008.d/+MS2(585.2664), 32.1eV, 35.6min #9772	ZW_Neuroblastom_E22965-08_3_RA3_01_4008.d	SwissProt-human-oReAlk2019_Mascot_2019-10-14 16:08:34	Protein Search
826.939	0.0515696	1652.87	1652.87	58.4 (M.expect:0.0,M.score:58.4)	43 - 58	R.GQAAVQQLQAEGLSPR.F	60438	CBR1_HUMAN	Carbonyl reductase [NADPH] 1 OS=Homo sapiens OX=9606 GN=CBR1 PE=1 SV=3	2534		TRUE	5287	1651.86	826.939	1651.86	2	4.2645e-05	8.52899e-05	0.0516011	8.20719	0.00531162	10.7349	0.0114618	34.44	1	1		1	23.8569	0				CID	/Neuroblastom-Imaging/Imaging-Sample1/ZW_Neuroblastom_E22965-08_3_RA3_01_4008.d/+MS2(826.9394), 46.3eV, 34.4min #9372	ZW_Neuroblastom_E22965-08_3_RA3_01_4008.d	SwissProt-human-oReAlk2019_Mascot_2019-10-14 16:08:34	Protein Search
747.354	1.86858	1493.7	1493.7	49.4 (M.expect:0.0,M.score:49.4)	432 - 444	R.FNTANDDNVTQVR.A	95834	CATA_HUMAN	Catalase OS=Homo sapiens OX=9606 GN=CAT PE=1 SV=3	1905		TRUE	7380	1492.69	747.353	1492.69	2	0.00139649	0.00279298	1.86984	6.29205	0.00405686	9.61832	0.00678008	24.4678	1	1		1	13.5123	0				CID	/Neuroblastom-Imaging/Imaging-Sample1/ZW_Neuroblastom_E22965-08_3_RA3_01_4008.d/+MS2(747.3540), 38.7eV, 24.5min #5852	ZW_Neuroblastom_E22965-08_3_RA3_01_4008.d	SwissProt-human-oReAlk2019_Mascot_2019-10-14 16:08:34	Protein Search
788.767	-0.0981486	2364.29	2364.29	40.8 (M.expect:0.0,M.score:40.8)	24 - 47	K.ADVLTTGAGNPVGDKLNVITVGPR.G	56120	CATA_HUMAN	Catalase OS=Homo sapiens OX=9606 GN=CAT PE=1 SV=3	3765		TRUE	9132	2363.28	788.768	2363.28	3	-7.74165e-05	-0.000232249	-0.0982323	4.56914	0.00382212	7.81226	0.00489774	48.5793	1	1		1	25.4995	1				CID	/Neuroblastom-Imaging/Imaging-Sample1/ZW_Neuroblastom_E22965-08_3_RA3_01_4008.d/+MS2(788.7675), 38.6eV, 48.6min #13642	ZW_Neuroblastom_E22965-08_3_RA3_01_4008.d	SwissProt-human-oReAlk2019_Mascot_2019-10-14 16:08:34	Protein Search
438.733	1.40246	876.459	876.457	28.6 (M.expect:0.0,M.score:28.6)	80 - 87	K.LPASFDAR.E	351538	CATB_HUMAN	Cathepsin B OS=Homo sapiens OX=9606 GN=CTSB PE=1 SV=3	102		TRUE	7589	875.451	438.732	875.45	2	0.000615308	0.00123062	1.40408	3.31383	0.00118515	5.03362	0.00231722	26.0967	1	1		1	40.2278	0				CID	/Neuroblastom-Imaging/Imaging-Sample1/ZW_Neuroblastom_E22965-08_3_RA3_01_4008.d/+MS2(438.7329), 24.5eV, 26.1min #6439	ZW_Neuroblastom_E22965-08_3_RA3_01_4008.d	SwissProt-human-oReAlk2019_Mascot_2019-10-14 16:08:34	Protein Search
552.813	-0.649439	1104.62	1104.62	49.1 (M.expect:0.0,M.score:49.1)	231 - 239	R.VSSFLPWIR.T	25010	CATG_HUMAN	Cathepsin G OS=Homo sapiens OX=9606 GN=CTSG PE=1 SV=2	574		TRUE	11343	1103.61	552.814	1103.61	2	-0.000359019	-0.000718037	-0.650031	3.45924	0.00133632	3.81292	0.00165548	55.7386	2	1		1	41.0795	0				CID	/Neuroblastom-Imaging/Imaging-Sample1/ZW_Neuroblastom_E22965-08_3_RA3_01_4008.d/+MS2(552.8133), 30.2eV, 55.7min #15557	ZW_Neuroblastom_E22965-08_3_RA3_01_4008.d	SwissProt-human-oReAlk2019_Mascot_2019-10-14 16:08:34	Protein Search
552.813	-0.36001	1104.62	1104.62	60.7 (M.expect:0.0,M.score:60.7)	231 - 239	R.VSSFLPWIR.T	83952	CATG_HUMAN	Cathepsin G OS=Homo sapiens OX=9606 GN=CTSG PE=1 SV=2	575		TRUE	12924	1103.61	552.814	1103.61	2	-0.000199019	-0.000398037	-0.360339	5.77717	0.00245793	6.54478	0.00425722	55.8294	2	1		1	40.6303	0				CID	/Neuroblastom-Imaging/Imaging-Sample1/ZW_Neuroblastom_E22965-08_3_RA3_01_4008.d/+MS2(552.8135), 30.2eV, 55.8min #15577	ZW_Neuroblastom_E22965-08_3_RA3_01_4008.d	SwissProt-human-oReAlk2019_Mascot_2019-10-14 16:08:34	Protein Search
588.308	3.11896	1175.61	1175.61	14.1 (M.expect:0.0,M.score:14.1)	220 - 230	K.SSGVPPEVFTR.V	36710	CATG_HUMAN	Cathepsin G OS=Homo sapiens OX=9606 GN=CTSG PE=1 SV=2	783		TRUE	3663	1174.6	588.306	1174.6	2	0.00183491	0.00366981	3.12163	8.01107	0.00439179	32.9072	0.00695312	33.6058	1	1		1	12.972	0				CID	/Neuroblastom-Imaging/Imaging-Sample1/ZW_Neuroblastom_E22965-08_3_RA3_01_4008.d/+MS2(588.3082), 32.3eV, 33.6min #9082	ZW_Neuroblastom_E22965-08_3_RA3_01_4008.d	SwissProt-human-oReAlk2019_Mascot_2019-10-14 16:08:34	Protein Search
772.928	1.85948	1544.85	1544.85	18.5 (M.expect:0.0,M.score:18.5)	104 - 116	R.TIQNDIMLLQLSR.R	11230	CATG_HUMAN	Cathepsin G OS=Homo sapiens OX=9606 GN=CTSG PE=1 SV=2	2099		TRUE	11138	1543.84	772.927	1543.84	2	0.00143724	0.00287449	1.86069	11.2654	0.00740693	22.0545	0.0172463	55.2694	1	1		1	7.58304	0				CID	/Neuroblastom-Imaging/Imaging-Sample1/ZW_Neuroblastom_E22965-08_3_RA3_01_4008.d/+MS2(772.9283), 41.8eV, 55.3min #15433	ZW_Neuroblastom_E22965-08_3_RA3_01_4008.d	SwissProt-human-oReAlk2019_Mascot_2019-10-14 16:08:34	Protein Search
654.831	0.220445	1308.65	1308.65	35.1 (M.expect:0.0,M.score:35.1)	70 - 81	R.NVDGVNYASITR.N	68954	CATZ_HUMAN	Cathepsin Z OS=Homo sapiens OX=9606 GN=CTSZ PE=1 SV=1	1263		TRUE	3873	1307.65	654.831	1307.65	2	0.000144354	0.000288708	0.220615	9.70062	0.00590233	17.633	0.0118403	31.8308	1	1		1	20.0506	0				CID	/Neuroblastom-Imaging/Imaging-Sample1/ZW_Neuroblastom_E22965-08_3_RA3_01_4008.d/+MS2(654.8309), 33.0eV, 31.8min #8469	ZW_Neuroblastom_E22965-08_3_RA3_01_4008.d	SwissProt-human-oReAlk2019_Mascot_2019-10-14 16:08:34	Protein Search
796.922	-2.01522	1592.84	1592.84	21.6 (M.expect:0.0,M.score:21.6)	240 - 255	R.EGSGNPTPLINPLAGR.A	19598	CNOT2_HUMAN	CCR4-NOT transcription complex subunit 2 OS=Homo sapiens OX=9606 GN=CNOT2 PE=1 SV=1	2259		TRUE	10939	1591.83	796.923	1591.83	2	-0.00160597	-0.00321195	-2.0165	25.5642	0.00781347	63.984	0.0133279	45.8676	1	1		1	15.1649	0				CID	/Neuroblastom-Imaging/Imaging-Sample1/ZW_Neuroblastom_E22965-08_3_RA3_01_4008.d/+MS2(796.9216), 44.6eV, 45.9min #12884	ZW_Neuroblastom_E22965-08_3_RA3_01_4008.d	SwissProt-human-oReAlk2019_Mascot_2019-10-14 16:08:34	Protein Search
500.296	-0.404657	1498.87	1498.87	22.4 (M.expect:0.0,M.score:22.4)	124 - 138	K.SPAPPLLHVAALGQK.Q	96762	CCAR2_HUMAN	Cell cycle and apoptosis regulator protein 2 OS=Homo sapiens OX=9606 GN=CCAR2 PE=1 SV=2	1925		TRUE	10667	1497.87	500.296	1497.87	3	-0.000202448	-0.000607345	-0.405201	3.27161	0.00229526	4.1501	0.00275941	38.6957	1	1		1	17.8485	0				CID	/Neuroblastom-Imaging/Imaging-Sample1/ZW_Neuroblastom_E22965-08_3_RA3_01_4008.d/+MS2(500.2960), 25.0eV, 38.7min #10782	ZW_Neuroblastom_E22965-08_3_RA3_01_4008.d	SwissProt-human-oReAlk2019_Mascot_2019-10-14 16:08:34	Protein Search
489.822	1.56642	978.636	978.635	38.8 (M.expect:0.0,M.score:38.8)	478 - 487	R.LGLLGLPAPK.N	18850	CDC5L_HUMAN	Cell division cycle 5-like protein OS=Homo sapiens OX=9606 GN=CDC5L PE=1 SV=2	283		TRUE	13407	977.629	489.821	977.627	2	0.000767266	0.00153453	1.56803	4.63481	0.00197028	6.57358	0.00292023	48.6835	1	1		1	32.722	0				CID	/Neuroblastom-Imaging/Imaging-Sample1/ZW_Neuroblastom_E22965-08_3_RA3_01_4008.d/+MS2(489.8217), 26.6eV, 48.7min #13675	ZW_Neuroblastom_E22965-08_3_RA3_01_4008.d	SwissProt-human-oReAlk2019_Mascot_2019-10-14 16:08:34	Protein Search
759.378	0.0452631	1517.75	1517.75	29.7 (M.expect:0.0,M.score:29.7)	488 - 500	K.NDFEIVLPENAEK.E	27432	CDC5L_HUMAN	Cell division cycle 5-like protein OS=Homo sapiens OX=9606 GN=CDC5L PE=1 SV=2	1983		TRUE	10151	1516.74	759.378	1516.74	2	3.43718e-05	6.87436e-05	0.0452932	4.39739	0.00302672	6.5221	0.00362817	47.8117	1	1		1	19.043	0				CID	/Neuroblastom-Imaging/Imaging-Sample1/ZW_Neuroblastom_E22965-08_3_RA3_01_4008.d/+MS2(759.3778), 40.1eV, 47.8min #13435	ZW_Neuroblastom_E22965-08_3_RA3_01_4008.d	SwissProt-human-oReAlk2019_Mascot_2019-10-14 16:08:34	Protein Search
843.962	0.176388	1686.92	1686.92	50.1 (M.expect:0.0,M.score:50.1)	400 - 414	R.QVVQTPNTVLSTPFR.T	27038	CDC5L_HUMAN	Cell division cycle 5-like protein OS=Homo sapiens OX=9606 GN=CDC5L PE=1 SV=2	2617		TRUE	9050	1685.91	843.962	1685.91	2	0.000148865	0.00029773	0.176493	22.1979	0.0169879	58.8011	0.0217738	46.0701	1	1		1	22.5207	0				CID	/Neuroblastom-Imaging/Imaging-Sample1/ZW_Neuroblastom_E22965-08_3_RA3_01_4008.d/+MS2(843.9625), 47.2eV, 46.1min #12940	ZW_Neuroblastom_E22965-08_3_RA3_01_4008.d	SwissProt-human-oReAlk2019_Mascot_2019-10-14 16:08:34	Protein Search
1005.01	-1.34281	2009	2009.01	32.8 (M.expect:0.0,M.score:32.8)	272 - 290	K.ESDLPSAILQTSGVSEFTK.K	13970	CDC5L_HUMAN	Cell division cycle 5-like protein OS=Homo sapiens OX=9606 GN=CDC5L PE=1 SV=2	3444		TRUE	13967	2008	1005.01	2008	2	-0.00134953	-0.00269907	-1.34349	10.5263	0.00927613	13.3651	0.0163574	58.5489	1	1		1	14.2229	0				CID	/Neuroblastom-Imaging/Imaging-Sample1/ZW_Neuroblastom_E22965-08_3_RA3_01_4008.d/+MS2(1005.0060), 55.6eV, 58.6min #16274	ZW_Neuroblastom_E22965-08_3_RA3_01_4008.d	SwissProt-human-oReAlk2019_Mascot_2019-10-14 16:08:34	Protein Search
1087.3	-1.58125	4346.18	4346.18	45.9 (M.expect:0.0,M.score:45.9)	73 - 115	R.AQEEGPGEPPPPELALLPPPPPPPPTPATPTSSASNLDLGEQR.E	4158	CENPV_HUMAN	Centromere protein V OS=Homo sapiens OX=9606 GN=CENPV PE=1 SV=1	4061		TRUE	13767	4345.17	1087.3	4345.18	4	-0.00171929	-0.00687716	-1.58235	12.0115	0.0133451	17.5613	0.0164553	66.296	1	1		1	12.8122	0				CID	/Neuroblastom-Imaging/Imaging-Sample1/ZW_Neuroblastom_E22965-08_3_RA3_01_4008.d/+MS2(1087.2994), 54.4eV, 66.3min #17996	ZW_Neuroblastom_E22965-08_3_RA3_01_4008.d	SwissProt-human-oReAlk2019_Mascot_2019-10-14 16:08:34	Protein Search
676.327	1.95998	1351.65	1351.64	34.2 (M.expect:0.0,M.score:34.2)	627 - 640	R.STGSATSLASQGER.R	31510	CE170_HUMAN	Centrosomal protein of 170 kDa OS=Homo sapiens OX=9606 GN=CEP170 PE=1 SV=1	1430		TRUE	3298	1350.64	676.326	1350.64	2	0.00132559	0.00265118	1.96145	14.5554	0.00871671	21.0547	0.0152559	16.6	1	1		1	11.3541	0				CID	/Neuroblastom-Imaging/Imaging-Sample1/ZW_Neuroblastom_E22965-08_3_RA3_01_4008.d/+MS2(676.3274), 33.0eV, 16.6min #3060	ZW_Neuroblastom_E22965-08_3_RA3_01_4008.d	SwissProt-human-oReAlk2019_Mascot_2019-10-14 16:08:34	Protein Search
686.384	-1.36473	1371.76	1371.76	30.4 (M.expect:0.0,M.score:30.4)	469 - 481	K.GAYPLSIEPIGVR.F	46454	CERU_HUMAN	Ceruloplasmin OS=Homo sapiens OX=9606 GN=CP PE=1 SV=1	1528		TRUE	9479	1370.75	686.385	1370.76	2	-0.00093673	-0.00187346	-1.36573	3.5669	0.00213062	12.6463	0.0029392	49.3968	1	1		1	20.1018	0				CID	/Neuroblastom-Imaging/Imaging-Sample1/ZW_Neuroblastom_E22965-08_3_RA3_01_4008.d/+MS2(686.3842), 33.0eV, 49.4min #13859	ZW_Neuroblastom_E22965-08_3_RA3_01_4008.d	SwissProt-human-oReAlk2019_Mascot_2019-10-14 16:08:34	Protein Search
894.916	-0.046751	1788.82	1788.82	50.4 (M.expect:0.0,M.score:50.4)	198 - 215	K.AEAAASALADADADLEER.L	40192	CHM2A_HUMAN	Charged multivesicular body protein 2a OS=Homo sapiens OX=9606 GN=CHMP2A PE=1 SV=1	2967		TRUE	6930	1787.82	894.916	1787.82	2	-4.18382e-05	-8.36765e-05	-0.0467774	7.55518	0.0060871	12.3909	0.0102666	41.1759	1	1		1	20.3789	0				CID	/Neuroblastom-Imaging/Imaging-Sample1/ZW_Neuroblastom_E22965-08_3_RA3_01_4008.d/+MS2(894.9159), 49.8eV, 41.2min #11555	ZW_Neuroblastom_E22965-08_3_RA3_01_4008.d	SwissProt-human-oReAlk2019_Mascot_2019-10-14 16:08:34	Protein Search
729.876	-2.24921	1458.74	1458.75	21.6 (M.expect:0.0,M.score:21.6)	2 - 13	M.AEEQPQVELFVK.A	39006	CLIC1_HUMAN	Chloride intracellular channel protein 1 OS=Homo sapiens OX=9606 GN=CLIC1 PE=1 SV=4	1780		TRUE	11245	1457.74	729.877	1457.74	2	-0.00164164	-0.00328329	-2.25076	4.46324	0.00277635	6.5104	0.00363022	57.2011	6	1		1	21.9942	0	Acetyl: 1			CID	/Neuroblastom-Imaging/Imaging-Sample1/ZW_Neuroblastom_E22965-08_3_RA3_01_4008.d/+MS2(729.8757), 36.6eV, 57.2min #15938	ZW_Neuroblastom_E22965-08_3_RA3_01_4008.d	SwissProt-human-oReAlk2019_Mascot_2019-10-14 16:08:34	Protein Search
729.876	-2.00259	1458.74	1458.75	28.3 (M.expect:0.0,M.score:28.3)	2 - 13	M.AEEQPQVELFVK.A	59952	CLIC1_HUMAN	Chloride intracellular channel protein 1 OS=Homo sapiens OX=9606 GN=CLIC1 PE=1 SV=4	1781		TRUE	13417	1457.74	729.877	1457.74	2	-0.00146164	-0.00292329	-2.00398	5.91742	0.00368142	6.2805	0.004923	57.4112	6	1		1	30.5479	0	Acetyl: 1			CID	/Neuroblastom-Imaging/Imaging-Sample1/ZW_Neuroblastom_E22965-08_3_RA3_01_4008.d/+MS2(729.8759), 36.6eV, 57.4min #15998	ZW_Neuroblastom_E22965-08_3_RA3_01_4008.d	SwissProt-human-oReAlk2019_Mascot_2019-10-14 16:08:34	Protein Search
729.876	-1.87928	1458.74	1458.75	51.4 (M.expect:0.0,M.score:51.4)	2 - 13	M.AEEQPQVELFVK.A	101746	CLIC1_HUMAN	Chloride intracellular channel protein 1 OS=Homo sapiens OX=9606 GN=CLIC1 PE=1 SV=4	1782		TRUE	13465	1457.74	729.877	1457.74	2	-0.00137164	-0.00274329	-1.88058	10.4081	0.00835407	11.5074	0.0106301	57.2566	6	1		1	33.3445	0	Acetyl: 1			CID	/Neuroblastom-Imaging/Imaging-Sample1/ZW_Neuroblastom_E22965-08_3_RA3_01_4008.d/+MS2(729.8760), 36.6eV, 57.3min #15955	ZW_Neuroblastom_E22965-08_3_RA3_01_4008.d	SwissProt-human-oReAlk2019_Mascot_2019-10-14 16:08:34	Protein Search
729.876	-1.44085	1458.75	1458.75	17.0 (M.expect:0.0,M.score:17.0)	2 - 13	M.AEEQPQVELFVK.A	157510	CLIC1_HUMAN	Chloride intracellular channel protein 1 OS=Homo sapiens OX=9606 GN=CLIC1 PE=1 SV=4	1783		TRUE	12828	1457.74	729.877	1457.74	2	-0.00105164	-0.00210329	-1.44185	19.305	0.0124275	35.1041	0.0186449	57.3105	6	1		1	34.4768	0	Acetyl: 1			CID	/Neuroblastom-Imaging/Imaging-Sample1/ZW_Neuroblastom_E22965-08_3_RA3_01_4008.d/+MS2(729.8763), 36.6eV, 57.3min #15970	ZW_Neuroblastom_E22965-08_3_RA3_01_4008.d	SwissProt-human-oReAlk2019_Mascot_2019-10-14 16:08:34	Protein Search
729.876	-1.41345	1458.75	1458.75	24.0 (M.expect:0.0,M.score:24.0)	2 - 13	M.AEEQPQVELFVK.A	126048	CLIC1_HUMAN	Chloride intracellular channel protein 1 OS=Homo sapiens OX=9606 GN=CLIC1 PE=1 SV=4	1784		TRUE	14021	1457.74	729.877	1457.74	2	-0.00103164	-0.00206329	-1.41443	7.73624	0.00594807	22.4432	0.0138719	57.3595	6	1		1	30.4026	0	Acetyl: 1			CID	/Neuroblastom-Imaging/Imaging-Sample1/ZW_Neuroblastom_E22965-08_3_RA3_01_4008.d/+MS2(729.8763), 36.6eV, 57.4min #15984	ZW_Neuroblastom_E22965-08_3_RA3_01_4008.d	SwissProt-human-oReAlk2019_Mascot_2019-10-14 16:08:34	Protein Search
729.876	-1.20794	1458.75	1458.75	29.4 (M.expect:0.0,M.score:29.4)	2 - 13	M.AEEQPQVELFVK.A	34186	CLIC1_HUMAN	Chloride intracellular channel protein 1 OS=Homo sapiens OX=9606 GN=CLIC1 PE=1 SV=4	1785		TRUE	13531	1457.74	729.877	1457.74	2	-0.000881644	-0.00176329	-1.20877	3.67859	0.0018356	4.53018	0.00209611	57.4623	6	1		1	17.4163	0	Acetyl: 1			CID	/Neuroblastom-Imaging/Imaging-Sample1/ZW_Neuroblastom_E22965-08_3_RA3_01_4008.d/+MS2(729.8765), 36.6eV, 57.5min #16011	ZW_Neuroblastom_E22965-08_3_RA3_01_4008.d	SwissProt-human-oReAlk2019_Mascot_2019-10-14 16:08:34	Protein Search
684.861	-1.27684	1368.71	1368.72	16.3 (M.expect:0.0,M.score:16.3)	8 - 21	K.VGEIFSAAGAAFTK.L	17966	BAP18_HUMAN	Chromatin complexes subunit BAP18 OS=Homo sapiens OX=9606 GN=BAP18 PE=1 SV=1	1516		TRUE	9596	1367.71	684.862	1367.71	2	-0.000874458	-0.00174892	-1.27778	8.06123	0.00411604	18.3169	0.0123566	47.8673	1	1		1	14.2624	0				CID	/Neuroblastom-Imaging/Imaging-Sample1/ZW_Neuroblastom_E22965-08_3_RA3_01_4008.d/+MS2(684.8607), 33.0eV, 47.9min #13449	ZW_Neuroblastom_E22965-08_3_RA3_01_4008.d	SwissProt-human-oReAlk2019_Mascot_2019-10-14 16:08:34	Protein Search
723.86	0.315706	1446.71	1446.71	47.3 (M.expect:0.0,M.score:47.3)	39 - 51	R.ASMQQQQQLASAR.N	92766	CHTOP_HUMAN	Chromatin target of PRMT1 protein OS=Homo sapiens OX=9606 GN=CHTOP PE=1 SV=2	1762		TRUE	7678	1445.7	723.86	1445.7	2	0.000228527	0.000457054	0.315926	4.70937	0.00389559	8.07507	0.00859504	19.3274	1	1		1	18.7074	0				CID	/Neuroblastom-Imaging/Imaging-Sample1/ZW_Neuroblastom_E22965-08_3_RA3_01_4008.d/+MS2(723.8598), 35.9eV, 19.3min #3922	ZW_Neuroblastom_E22965-08_3_RA3_01_4008.d	SwissProt-human-oReAlk2019_Mascot_2019-10-14 16:08:34	Protein Search
777.859	0.60066	1554.71	1554.71	28.1 (M.expect:0.0,M.score:28.1)	214 - 226	K.EQLDNQLDAYMSK.T	65228	CHTOP_HUMAN	Chromatin target of PRMT1 protein OS=Homo sapiens OX=9606 GN=CHTOP PE=1 SV=2	2127		TRUE	3772	1553.7	777.859	1553.7	2	0.000467229	0.000934458	0.601049	5.82685	0.00483856	29.3298	0.011211	40.3487	1	1		1	7.31219	0				CID	/Neuroblastom-Imaging/Imaging-Sample1/ZW_Neuroblastom_E22965-08_3_RA3_01_4008.d/+MS2(777.8593), 42.3eV, 40.4min #11303	ZW_Neuroblastom_E22965-08_3_RA3_01_4008.d	SwissProt-human-oReAlk2019_Mascot_2019-10-14 16:08:34	Protein Search
495.274	-0.19521	989.541	989.541	28.8 (M.expect:0.0,M.score:28.8)	275 - 283	K.LAVDTFPAR.V	61624	CBX8_HUMAN	Chromobox protein homolog 8 OS=Homo sapiens OX=9606 GN=CBX8 PE=1 SV=3	312		TRUE	7004	988.534	495.274	988.534	2	-9.66826e-05	-0.000193365	-0.195409	4.07538	0.00191554	34.9783	0.0087465	33.5581	1	1		1	17.4841	0				CID	/Neuroblastom-Imaging/Imaging-Sample1/ZW_Neuroblastom_E22965-08_3_RA3_01_4008.d/+MS2(495.2743), 26.8eV, 33.6min #9069	ZW_Neuroblastom_E22965-08_3_RA3_01_4008.d	SwissProt-human-oReAlk2019_Mascot_2019-10-14 16:08:34	Protein Search
785.072	-0.250324	2353.2	2353.2	17.4 (M.expect:0.0,M.score:17.4)	206 - 227	K.ELPDPSQRPLGEPSAGLGEYLK.G	14042	CBX8_HUMAN	Chromobox protein homolog 8 OS=Homo sapiens OX=9606 GN=CBX8 PE=1 SV=3	3760		TRUE	9390	2352.2	785.073	2352.2	3	-0.000196522	-0.000589567	-0.250538	15.2484	0.0104906	18.5675	0.0133978	47.5656	1	1		1	10.3304	0				CID	/Neuroblastom-Imaging/Imaging-Sample1/ZW_Neuroblastom_E22965-08_3_RA3_01_4008.d/+MS2(785.0725), 38.1eV, 47.6min #13371	ZW_Neuroblastom_E22965-08_3_RA3_01_4008.d	SwissProt-human-oReAlk2019_Mascot_2019-10-14 16:08:34	Protein Search
621.08	-0.164647	2481.3	2481.3	25.2 (M.expect:0.0,M.score:25.2)	205 - 227	R.KELPDPSQRPLGEPSAGLGEYLK.G	15558	CBX8_HUMAN	Chromobox protein homolog 8 OS=Homo sapiens OX=9606 GN=CBX8 PE=1 SV=3	3822		TRUE	3309	2480.29	621.08	2480.29	4	-0.000102259	-0.000409037	-0.164848	8.71689	0.00555863	11.5608	0.00979687	39.9515	1	1		1	14.9576	1				CID	/Neuroblastom-Imaging/Imaging-Sample1/ZW_Neuroblastom_E22965-08_3_RA3_01_4008.d/+MS2(621.0799), 27.0eV, 40.0min #11180	ZW_Neuroblastom_E22965-08_3_RA3_01_4008.d	SwissProt-human-oReAlk2019_Mascot_2019-10-14 16:08:34	Protein Search
444.771	0.661896	888.534	888.534	18.6 (M.expect:0.0,M.score:18.6)	1,496 - 1,503	R.IGVMSLIR.K	32558	CHD4_HUMAN	Chromodomain-helicase-DNA-binding protein 4 OS=Homo sapiens OX=9606 GN=CHD4 PE=1 SV=2	125		TRUE	13921	887.527	444.77	887.526	2	0.000294392	0.000588784	0.662647	9.65514	0.0039545	12.4297	0.00632891	44.0862	1	1		1	29.4157	0				CID	/Neuroblastom-Imaging/Imaging-Sample1/ZW_Neuroblastom_E22965-08_3_RA3_01_4008.d/+MS2(444.7707), 24.8eV, 44.1min #12400	ZW_Neuroblastom_E22965-08_3_RA3_01_4008.d	SwissProt-human-oReAlk2019_Mascot_2019-10-14 16:08:34	Protein Search
700.386	-2.78708	1399.76	1399.77	20.5 (M.expect:0.0,M.score:20.5)	1,648 - 1,660	K.SAIDLTPIVVEDK.E	18082	CHD4_HUMAN	Chromodomain-helicase-DNA-binding protein 4 OS=Homo sapiens OX=9606 GN=CHD4 PE=1 SV=2	1632		TRUE	11693	1398.76	700.388	1398.76	2	-0.00195203	-0.00390407	-2.78909	2.35005	0.00143671	4.68796	0.00247111	50.2734	1	1		1	13.9818	0				CID	/Neuroblastom-Imaging/Imaging-Sample1/ZW_Neuroblastom_E22965-08_3_RA3_01_4008.d/+MS2(700.3856), 33.0eV, 50.3min #14102	ZW_Neuroblastom_E22965-08_3_RA3_01_4008.d	SwissProt-human-oReAlk2019_Mascot_2019-10-14 16:08:34	Protein Search
711.355	0.344578	1421.7	1421.7	28.4 (M.expect:0.0,M.score:28.4)	1,900 - 1,912	R.APEPTPQQVAQQQ.-	83598	CHD4_HUMAN	Chromodomain-helicase-DNA-binding protein 4 OS=Homo sapiens OX=9606 GN=CHD4 PE=1 SV=2	1686		TRUE	5408	1420.7	711.355	1420.69	2	0.000245117	0.000490234	0.344822	6.29836	0.00531123	9.14349	0.0101491	27.9804	1	1		1	9.9485	0				CID	/Neuroblastom-Imaging/Imaging-Sample1/ZW_Neuroblastom_E22965-08_3_RA3_01_4008.d/+MS2(711.3549), 34.4eV, 28.0min #7135	ZW_Neuroblastom_E22965-08_3_RA3_01_4008.d	SwissProt-human-oReAlk2019_Mascot_2019-10-14 16:08:34	Protein Search
703.843	-0.140188	1406.68	1406.68	35.4 (M.expect:0.0,M.score:35.4)	458 - 470	K.TSPASLDFPESQK.S	38836	CHAP1_HUMAN	Chromosome alignment-maintaining phosphoprotein 1 OS=Homo sapiens OX=9606 GN=CHAMP1 PE=1 SV=2	1650		TRUE	5477	1405.67	703.844	1405.67	2	-9.86701e-05	-0.00019734	-0.140288	7.84054	0.00600382	11.498	0.00753157	33.4528	1	1		1	23.2742	0				CID	/Neuroblastom-Imaging/Imaging-Sample1/ZW_Neuroblastom_E22965-08_3_RA3_01_4008.d/+MS2(703.8434), 33.5eV, 33.5min #9029	ZW_Neuroblastom_E22965-08_3_RA3_01_4008.d	SwissProt-human-oReAlk2019_Mascot_2019-10-14 16:08:34	Protein Search
409.593	1.78413	1226.76	1226.76	29.3 (M.expect:0.0,M.score:29.3)	1,444 - 1,453	K.QLPLVKPYLR.S	39224	CLH1_HUMAN	Clathrin heavy chain 1 OS=Homo sapiens OX=9606 GN=CLTC PE=1 SV=5	955		TRUE	12805	1225.76	409.592	1225.75	3	0.000730767	0.0021923	1.78706	7.10738	0.00378023	50.0059	0.0125228	34.8081	1	1		1	16.0982	0				CID	/Neuroblastom-Imaging/Imaging-Sample1/ZW_Neuroblastom_E22965-08_3_RA3_01_4008.d/+MS2(409.5929), 23.2eV, 34.8min #9503	ZW_Neuroblastom_E22965-08_3_RA3_01_4008.d	SwissProt-human-oReAlk2019_Mascot_2019-10-14 16:08:34	Protein Search
667.821	0.691915	1334.63	1334.63	43.8 (M.expect:0.0,M.score:43.8)	882 - 892	K.IYIDSNNNPER.F	124884	CLH1_HUMAN	Clathrin heavy chain 1 OS=Homo sapiens OX=9606 GN=CLTC PE=1 SV=5	1375		TRUE	7560	1333.63	667.82	1333.63	2	0.000462075	0.00092415	0.692437	7.52843	0.00486771	18.81	0.00822042	23.3679	1	1		1	26.3601	0				CID	/Neuroblastom-Imaging/Imaging-Sample1/ZW_Neuroblastom_E22965-08_3_RA3_01_4008.d/+MS2(667.8209), 33.0eV, 23.4min #5438	ZW_Neuroblastom_E22965-08_3_RA3_01_4008.d	SwissProt-human-oReAlk2019_Mascot_2019-10-14 16:08:34	Protein Search
657.682	1.47064	1971.03	1971.03	43.5 (M.expect:0.0,M.score:43.5)	1,227 - 1,245	R.LASTLVHLGEYQAAVDGAR.K	38230	CLH1_HUMAN	Clathrin heavy chain 1 OS=Homo sapiens OX=9606 GN=CLTC PE=1 SV=5	3392		TRUE	5461	1970.03	657.681	1970.02	3	0.000967211	0.00290163	1.47214	11.1484	0.0112877	15.5086	0.0137053	41.5306	1	1		1	16.9263	0				CID	/Neuroblastom-Imaging/Imaging-Sample1/ZW_Neuroblastom_E22965-08_3_RA3_01_4008.d/+MS2(657.6823), 27.0eV, 41.5min #11657	ZW_Neuroblastom_E22965-08_3_RA3_01_4008.d	SwissProt-human-oReAlk2019_Mascot_2019-10-14 16:08:34	Protein Search
873.458	-1.45394	1745.91	1745.91	26.2 (M.expect:0.0,M.score:26.2)	36 - 50	R.TINLYPLTNYTFGTK.E	14292	CPSF5_HUMAN	Cleavage and polyadenylation specificity factor subunit 5 OS=Homo sapiens OX=9606 GN=NUDT21 PE=1 SV=1	2814		TRUE	12108	1744.9	873.459	1744.9	2	-0.00126995	-0.00253991	-1.45478	10.0572	0.00627146	33.0013	0.0115387	57.4759	1	1		1	22.1114	0				CID	/Neuroblastom-Imaging/Imaging-Sample1/ZW_Neuroblastom_E22965-08_3_RA3_01_4008.d/+MS2(873.4578), 48.7eV, 57.5min #16018	ZW_Neuroblastom_E22965-08_3_RA3_01_4008.d	SwissProt-human-oReAlk2019_Mascot_2019-10-14 16:08:34	Protein Search
581.071	1.20653	2321.26	2321.26	28.3 (M.expect:0.0,M.score:28.3)	16 - 35	R.GVTQFGNKYIQQTKPLTLER.T	92832	CPSF5_HUMAN	Cleavage and polyadenylation specificity factor subunit 5 OS=Homo sapiens OX=9606 GN=NUDT21 PE=1 SV=1	3751		TRUE	877	2320.26	581.071	2320.25	4	0.000701083	0.00280433	1.2081	14.7612	0.0100846	26.5164	0.0137409	34.6647	1	1		1	13.3522	1				CID	/Neuroblastom-Imaging/Imaging-Sample1/ZW_Neuroblastom_E22965-08_3_RA3_01_4008.d/+MS2(581.0715), 26.6eV, 34.7min #9458	ZW_Neuroblastom_E22965-08_3_RA3_01_4008.d	SwissProt-human-oReAlk2019_Mascot_2019-10-14 16:08:34	Protein Search
700.835	0.394181	1400.66	1400.66	23.0 (M.expect:0.0,M.score:23.0)	162 - 172	K.QFLSQFEMQSR.K	18110	CPSF6_HUMAN	Cleavage and polyadenylation specificity factor subunit 6 OS=Homo sapiens OX=9606 GN=CPSF6 PE=1 SV=2	1635		TRUE	6087	1399.66	700.835	1399.66	2	0.000276256	0.000552512	0.394465	10.4958	0.00780773	15.0308	0.00883281	42.2023	1	1		1	10.3346	0				CID	/Neuroblastom-Imaging/Imaging-Sample1/ZW_Neuroblastom_E22965-08_3_RA3_01_4008.d/+MS2(700.8353), 33.2eV, 42.2min #11855	ZW_Neuroblastom_E22965-08_3_RA3_01_4008.d	SwissProt-human-oReAlk2019_Mascot_2019-10-14 16:08:34	Protein Search
555.932	1.49544	1665.78	1665.78	45.7 (M.expect:0.0,M.score:45.7)	407 - 420	R.TPLSEAEFEEIMNR.N	43770	CPSF6_HUMAN	Cleavage and polyadenylation specificity factor subunit 6 OS=Homo sapiens OX=9606 GN=CPSF6 PE=1 SV=2	2568		TRUE	10275	1664.77	555.931	1664.77	3	0.000831363	0.00249409	1.49725	6.80812	0.00462364	17.6228	0.00579812	51.3844	2	1		1	33.4327	0				CID	/Neuroblastom-Imaging/Imaging-Sample1/ZW_Neuroblastom_E22965-08_3_RA3_01_4008.d/+MS2(555.9320), 26.1eV, 51.4min #14385	ZW_Neuroblastom_E22965-08_3_RA3_01_4008.d	SwissProt-human-oReAlk2019_Mascot_2019-10-14 16:08:34	Protein Search
555.932	2.12501	1665.78	1665.78	49.2 (M.expect:0.0,M.score:49.2)	407 - 420	R.TPLSEAEFEEIMNR.N	55138	CPSF6_HUMAN	Cleavage and polyadenylation specificity factor subunit 6 OS=Homo sapiens OX=9606 GN=CPSF6 PE=1 SV=2	2569		TRUE	7903	1664.78	555.931	1664.77	3	0.00118136	0.00354409	2.12758	8.29005	0.00498176	49.7307	0.0108934	51.4873	2	1		1	25.9257	0				CID	/Neuroblastom-Imaging/Imaging-Sample1/ZW_Neuroblastom_E22965-08_3_RA3_01_4008.d/+MS2(555.9323), 26.1eV, 51.5min #14410	ZW_Neuroblastom_E22965-08_3_RA3_01_4008.d	SwissProt-human-oReAlk2019_Mascot_2019-10-14 16:08:34	Protein Search
561.265	4.47744	1681.78	1681.77	22.0 (M.expect:0.0,M.score:22.0)	407 - 420	R.TPLSEAEFEEIMNR.N	21214	CPSF6_HUMAN	Cleavage and polyadenylation specificity factor subunit 6 OS=Homo sapiens OX=9606 GN=CPSF6 PE=1 SV=2	2604		TRUE	4509	1680.77	561.263	1680.77	3	0.00251303	0.00753909	4.4828	6.38818	0.00297047	7.30005	0.00449651	42.0964	1	1		1	11.4034	0	Oxidation: 12			CID	/Neuroblastom-Imaging/Imaging-Sample1/ZW_Neuroblastom_E22965-08_3_RA3_01_4008.d/+MS2(561.2653), 26.2eV, 42.1min #11823	ZW_Neuroblastom_E22965-08_3_RA3_01_4008.d	SwissProt-human-oReAlk2019_Mascot_2019-10-14 16:08:34	Protein Search
731.344	0.481929	2192.02	2192.02	28.1 (M.expect:0.0,M.score:28.1)	324 - 343	R.DSGPPPSTVSEAEFEDIMKR.N	56494	CPSF7_HUMAN	Cleavage and polyadenylation specificity factor subunit 7 OS=Homo sapiens OX=9606 GN=CPSF7 PE=1 SV=1	3673		TRUE	7808	2191.01	731.344	2191.01	3	0.000352456	0.00105737	0.482372	3.55912	0.00297384	4.28071	0.0062196	47.8081	1	1		1	37.4942	1				CID	/Neuroblastom-Imaging/Imaging-Sample1/ZW_Neuroblastom_E22965-08_3_RA3_01_4008.d/+MS2(731.3444), 31.1eV, 47.8min #13433	ZW_Neuroblastom_E22965-08_3_RA3_01_4008.d	SwissProt-human-oReAlk2019_Mascot_2019-10-14 16:08:34	Protein Search
554.809	0.315501	1108.61	1108.61	32.9 (M.expect:0.0,M.score:32.9)	309 - 319	R.GSLPANVPTPR.G	103550	CSTF2_HUMAN	Cleavage stimulation factor subunit 2 OS=Homo sapiens OX=9606 GN=CSTF2 PE=1 SV=1	590		TRUE	7417	1107.6	554.809	1107.6	2	0.000175043	0.000350086	0.315788	8.1717	0.00440677	8.9715	0.00480207	29.895	1	1		1	19.7665	0				CID	/Neuroblastom-Imaging/Imaging-Sample1/ZW_Neuroblastom_E22965-08_3_RA3_01_4008.d/+MS2(554.8093), 30.3eV, 29.9min #7788	ZW_Neuroblastom_E22965-08_3_RA3_01_4008.d	SwissProt-human-oReAlk2019_Mascot_2019-10-14 16:08:34	Protein Search
1416.19	-2.05041	2831.38	2831.38	39.9 (M.expect:0.0,M.score:39.9)	103 - 130	K.SLGTGAPVIESPYGETISPEDAPESISK.A	5506	CSTF2_HUMAN	Cleavage stimulation factor subunit 2 OS=Homo sapiens OX=9606 GN=CSTF2 PE=1 SV=1	3923		TRUE	15086	2830.37	1416.2	2830.38	2	-0.00290378	-0.00580755	-2.05114	7.33235	0.00819211	9.30407	0.0120566	53.4959	1	1		1	17.1936	0				CID	/Neuroblastom-Imaging/Imaging-Sample1/ZW_Neuroblastom_E22965-08_3_RA3_01_4008.d/+MS2(1416.1924), 65.0eV, 53.5min #14947	ZW_Neuroblastom_E22965-08_3_RA3_01_4008.d	SwissProt-human-oReAlk2019_Mascot_2019-10-14 16:08:34	Protein Search
644.824	1.71169	1288.64	1288.64	36.3 (M.expect:0.0,M.score:36.3)	326 - 336	R.ELDESLQVAER.L	161788	CLUS_HUMAN	Clusterin OS=Homo sapiens OX=9606 GN=CLU PE=1 SV=1	1191		TRUE	4679	1287.63	644.823	1287.63	2	0.00110374	0.00220747	1.71303	3.04029	0.00216316	3.5426	0.00262171	32.7216	1	1		1	17.4754	0				CID	/Neuroblastom-Imaging/Imaging-Sample1/ZW_Neuroblastom_E22965-08_3_RA3_01_4008.d/+MS2(644.8237), 33.0eV, 32.7min #8780	ZW_Neuroblastom_E22965-08_3_RA3_01_4008.d	SwissProt-human-oReAlk2019_Mascot_2019-10-14 16:08:34	Protein Search
572.814	-0.00542234	1144.62	1144.62	68.6 (M.expect:0.0,M.score:68.6)	2 - 13	M.ASGVAVSDGVIK.V	264412	COF1_HUMAN	Cofilin-1 OS=Homo sapiens OX=9606 GN=CFL1 PE=1 SV=3	695		TRUE	4898	1143.61	572.814	1143.61	2	-3.10599e-06	-6.21198e-06	-0.00542711	4.02704	0.00301469	12.0355	0.00736111	43.2685	2	1		1	38.0347	0	Acetyl: 1			CID	/Neuroblastom-Imaging/Imaging-Sample1/ZW_Neuroblastom_E22965-08_3_RA3_01_4008.d/+MS2(572.8141), 31.4eV, 43.3min #12159	ZW_Neuroblastom_E22965-08_3_RA3_01_4008.d	SwissProt-human-oReAlk2019_Mascot_2019-10-14 16:08:34	Protein Search
572.814	0.169154	1144.62	1144.62	45.7 (M.expect:0.0,M.score:45.7)	2 - 13	M.ASGVAVSDGVIK.V	934928	COF1_HUMAN	Cofilin-1 OS=Homo sapiens OX=9606 GN=CFL1 PE=1 SV=3	696		TRUE	974	1143.61	572.814	1143.61	2	9.6894e-05	0.000193788	0.169303	1.73328	0.00114646	5.61253	0.00360193	43.3188	2	1		1	48.9588	0	Acetyl: 1			CID	/Neuroblastom-Imaging/Imaging-Sample1/ZW_Neuroblastom_E22965-08_3_RA3_01_4008.d/+MS2(572.8142), 31.4eV, 43.3min #12172	ZW_Neuroblastom_E22965-08_3_RA3_01_4008.d	SwissProt-human-oReAlk2019_Mascot_2019-10-14 16:08:34	Protein Search
670.893	0.425423	1340.78	1340.78	17.7 (M.expect:0.0,M.score:17.7)	153 - 166	K.LGGSAVISLEGKPL.-	41192	COF1_HUMAN	Cofilin-1 OS=Homo sapiens OX=9606 GN=CFL1 PE=1 SV=3	1397		TRUE	6161	1339.77	670.893	1339.77	2	0.000285414	0.000570827	0.425743	6.95576	0.00551671	7.8732	0.00657381	45.6624	1	1		1	15.0523	0				CID	/Neuroblastom-Imaging/Imaging-Sample1/ZW_Neuroblastom_E22965-08_3_RA3_01_4008.d/+MS2(670.8931), 33.0eV, 45.7min #12827	ZW_Neuroblastom_E22965-08_3_RA3_01_4008.d	SwissProt-human-oReAlk2019_Mascot_2019-10-14 16:08:34	Protein Search
939.983	-2.78311	1878.96	1878.96	17.3 (M.expect:0.0,M.score:17.3)	2 - 19	M.ASGVAVSDGVIKVFNDMK.V	17472	COF1_HUMAN	Cofilin-1 OS=Homo sapiens OX=9606 GN=CFL1 PE=1 SV=3	3116		TRUE	14494	1877.95	939.985	1877.96	2	-0.00261607	-0.00523215	-2.7846	6.1612	0.00512413	7.2441	0.00647068	61.0119	4	1		1	23.1399	1	Acetyl: 1			CID	/Neuroblastom-Imaging/Imaging-Sample1/ZW_Neuroblastom_E22965-08_3_RA3_01_4008.d/+MS2(939.9825), 52.0eV, 61.0min #16874	ZW_Neuroblastom_E22965-08_3_RA3_01_4008.d	SwissProt-human-oReAlk2019_Mascot_2019-10-14 16:08:34	Protein Search
939.983	-2.57034	1878.96	1878.96	33.9 (M.expect:0.0,M.score:33.9)	2 - 19	M.ASGVAVSDGVIKVFNDMK.V	22000	COF1_HUMAN	Cofilin-1 OS=Homo sapiens OX=9606 GN=CFL1 PE=1 SV=3	3117		TRUE	12847	1877.95	939.985	1877.96	2	-0.00241607	-0.00483215	-2.57172	9.9533	0.00893779	12.2605	0.0109501	60.916	4	1		1	26.8727	1	Acetyl: 1			CID	/Neuroblastom-Imaging/Imaging-Sample1/ZW_Neuroblastom_E22965-08_3_RA3_01_4008.d/+MS2(939.9827), 52.0eV, 60.9min #16851	ZW_Neuroblastom_E22965-08_3_RA3_01_4008.d	SwissProt-human-oReAlk2019_Mascot_2019-10-14 16:08:34	Protein Search
939.983	-1.93203	1878.96	1878.96	35.1 (M.expect:0.0,M.score:35.1)	2 - 19	M.ASGVAVSDGVIKVFNDMK.V	30198	COF1_HUMAN	Cofilin-1 OS=Homo sapiens OX=9606 GN=CFL1 PE=1 SV=3	3118		TRUE	13206	1877.95	939.985	1877.96	2	-0.00181607	-0.00363215	-1.93306	5.04326	0.00522981	8.24937	0.0103473	60.9589	4	1		1	24.3866	1	Acetyl: 1			CID	/Neuroblastom-Imaging/Imaging-Sample1/ZW_Neuroblastom_E22965-08_3_RA3_01_4008.d/+MS2(939.9833), 52.0eV, 61.0min #16860	ZW_Neuroblastom_E22965-08_3_RA3_01_4008.d	SwissProt-human-oReAlk2019_Mascot_2019-10-14 16:08:34	Protein Search
939.984	-1.47457	1878.96	1878.96	37.2 (M.expect:0.0,M.score:37.2)	2 - 19	M.ASGVAVSDGVIKVFNDMK.V	7742	COF1_HUMAN	Cofilin-1 OS=Homo sapiens OX=9606 GN=CFL1 PE=1 SV=3	3119		TRUE	14587	1877.95	939.985	1877.96	2	-0.00138607	-0.00277215	-1.47536	7.03922	0.00535997	7.98125	0.00617951	60.8565	4	1		1	20.8127	1	Acetyl: 1			CID	/Neuroblastom-Imaging/Imaging-Sample1/ZW_Neuroblastom_E22965-08_3_RA3_01_4008.d/+MS2(939.9837), 52.0eV, 60.9min #16835	ZW_Neuroblastom_E22965-08_3_RA3_01_4008.d	SwissProt-human-oReAlk2019_Mascot_2019-10-14 16:08:34	Protein Search
725.87	-0.0699937	1450.73	1450.73	50.8 (M.expect:0.0,M.score:50.8)	171 - 183	R.AAFTAFEEAQLPR.L	26726	CC124_HUMAN	Coiled-coil domain-containing protein 124 OS=Homo sapiens OX=9606 GN=CCDC124 PE=1 SV=1	1770		TRUE	9980	1449.73	725.87	1449.73	2	-5.08063e-05	-0.000101613	-0.0700423	7.41468	0.00483913	11.6225	0.00821728	46.4833	1	1		1	21.438	0				CID	/Neuroblastom-Imaging/Imaging-Sample1/ZW_Neuroblastom_E22965-08_3_RA3_01_4008.d/+MS2(725.8698), 36.2eV, 46.5min #13062	ZW_Neuroblastom_E22965-08_3_RA3_01_4008.d	SwissProt-human-oReAlk2019_Mascot_2019-10-14 16:08:34	Protein Search
845.126	0.121135	2533.36	2533.36	45.7 (M.expect:0.0,M.score:45.7)	24 - 51	R.AAPRPAPVAQPPAAAPPSAVGSSAAAPR.Q	42784	CHCH2_HUMAN	Coiled-coil-helix-coiled-coil-helix domain-containing protein 2 OS=Homo sapiens OX=9606 GN=CHCHD2 PE=1 SV=1	3841		TRUE	3411	2532.36	845.126	2532.36	3	0.000102374	0.000307122	0.121231	6.25298	0.00531021	8.73816	0.00643043	31.7288	1	1		1	30.3415	0				CID	/Neuroblastom-Imaging/Imaging-Sample1/ZW_Neuroblastom_E22965-08_3_RA3_01_4008.d/+MS2(845.1261), 42.3eV, 31.7min #8431	ZW_Neuroblastom_E22965-08_3_RA3_01_4008.d	SwissProt-human-oReAlk2019_Mascot_2019-10-14 16:08:34	Protein Search
665.937	0.620222	1995.8	1995.8	53.5 (M.expect:0.0,M.score:53.5)	155 - 172	R.SSGGSYRDSYDSYATHNE.-	115018	CIRBP_HUMAN	Cold-inducible RNA-binding protein OS=Homo sapiens OX=9606 GN=CIRBP PE=1 SV=1	3415		TRUE	4011	1994.79	665.937	1994.79	3	0.000413029	0.00123909	0.620848	5.97679	0.00382524	8.25921	0.0076115	21.2224	1	1		1	22.7538	1				CID	/Neuroblastom-Imaging/Imaging-Sample1/ZW_Neuroblastom_E22965-08_3_RA3_01_4008.d/+MS2(665.9370), 27.0eV, 21.2min #4641	ZW_Neuroblastom_E22965-08_3_RA3_01_4008.d	SwissProt-human-oReAlk2019_Mascot_2019-10-14 16:08:34	Protein Search
517.275	1.31594	1033.54	1033.54	18.1 (M.expect:0.0,M.score:18.1)	1,228 - 1,236	R.DLEVDTTLK.S	130168	CO1A1_HUMAN	Collagen alpha-1(I) chain OS=Homo sapiens OX=9606 GN=COL1A1 PE=1 SV=5	412		TRUE	7851	1032.54	517.274	1032.53	2	0.000680703	0.00136141	1.31722	5.17338	0.00201985	13.1706	0.0125693	36.4164	2	1		1	10.8121	0				CID	/Neuroblastom-Imaging/Imaging-Sample1/ZW_Neuroblastom_E22965-08_3_RA3_01_4008.d/+MS2(517.2749), 28.0eV, 36.4min #10034	ZW_Neuroblastom_E22965-08_3_RA3_01_4008.d	SwissProt-human-oReAlk2019_Mascot_2019-10-14 16:08:34	Protein Search
517.275	2.14722	1033.54	1033.54	27.9 (M.expect:0.0,M.score:27.9)	1,228 - 1,236	R.DLEVDTTLK.S	73918	CO1A1_HUMAN	Collagen alpha-1(I) chain OS=Homo sapiens OX=9606 GN=COL1A1 PE=1 SV=5	413		TRUE	1808	1032.54	517.274	1032.53	2	0.0011107	0.00222141	2.14931	11.4224	0.00860501	21.6015	0.0134535	36.3742	2	1		1	14.0273	0				CID	/Neuroblastom-Imaging/Imaging-Sample1/ZW_Neuroblastom_E22965-08_3_RA3_01_4008.d/+MS2(517.2753), 25.4eV, 36.4min #10024	ZW_Neuroblastom_E22965-08_3_RA3_01_4008.d	SwissProt-human-oReAlk2019_Mascot_2019-10-14 16:08:34	Protein Search
580.825	0.559512	1160.64	1160.64	41.3 (M.expect:0.0,M.score:41.3)	599 - 612	R.GVPGPPGAVGPAGK.D	176858	CO1A1_HUMAN	Collagen alpha-1(I) chain OS=Homo sapiens OX=9606 GN=COL1A1 PE=1 SV=5	733		TRUE	5192	1159.64	580.825	1159.63	2	0.000324979	0.000649958	0.559998	12.0679	0.00367666	22.8103	0.0105292	26.6244	1	1		1	45.1894	0				CID	/Neuroblastom-Imaging/Imaging-Sample1/ZW_Neuroblastom_E22965-08_3_RA3_01_4008.d/+MS2(580.8251), 31.8eV, 26.6min #6649	ZW_Neuroblastom_E22965-08_3_RA3_01_4008.d	SwissProt-human-oReAlk2019_Mascot_2019-10-14 16:08:34	Protein Search
581.29	0.462812	1161.57	1161.57	20.7 (M.expect:0.0,M.score:20.7)	575 - 586	R.GQAGVMGFPGPK.G	1067396	CO1A1_HUMAN	Collagen alpha-1(I) chain OS=Homo sapiens OX=9606 GN=COL1A1 PE=1 SV=5	734		TRUE	579	1160.57	581.29	1160.56	2	0.000269028	0.000538055	0.463213	3.76969	0.00144016	14.5633	0.00880826	30.6272	2	1		1	38.5107	0	Oxidation: 6			CID	/Neuroblastom-Imaging/Imaging-Sample1/ZW_Neuroblastom_E22965-08_3_RA3_01_4008.d/+MS2(581.2900), 31.9eV, 30.6min #8048	ZW_Neuroblastom_E22965-08_3_RA3_01_4008.d	SwissProt-human-oReAlk2019_Mascot_2019-10-14 16:08:34	Protein Search
581.29	1.03051	1161.57	1161.57	19.5 (M.expect:0.0,M.score:19.5)	575 - 586	R.GQAGVMGFPGPK.G	265390	CO1A1_HUMAN	Collagen alpha-1(I) chain OS=Homo sapiens OX=9606 GN=COL1A1 PE=1 SV=5	735		TRUE	5431	1160.57	581.29	1160.56	2	0.000599028	0.00119806	1.03141	4.09025	0.00225534	4.76158	0.00280622	30.4698	2	1		1	32.7465	0	Oxidation: 6			CID	/Neuroblastom-Imaging/Imaging-Sample1/ZW_Neuroblastom_E22965-08_3_RA3_01_4008.d/+MS2(581.2903), 31.9eV, 30.5min #7991	ZW_Neuroblastom_E22965-08_3_RA3_01_4008.d	SwissProt-human-oReAlk2019_Mascot_2019-10-14 16:08:34	Protein Search
649.309	-1.27425	1297.61	1297.61	27.1 (M.expect:0.0,M.score:27.1)	782 - 796	K.GESGPSGPAGPTGAR.G	97428	CO1A1_HUMAN	Collagen alpha-1(I) chain OS=Homo sapiens OX=9606 GN=COL1A1 PE=1 SV=5	1209		TRUE	2098	1296.6	649.31	1296.61	2	-0.000827379	-0.00165476	-1.27523	4.14307	0.00168713	5.23511	0.00278387	14.572	4	1		1	16.8047	0				CID	/Neuroblastom-Imaging/Imaging-Sample1/ZW_Neuroblastom_E22965-08_3_RA3_01_4008.d/+MS2(649.3094), 33.0eV, 14.6min #2414	ZW_Neuroblastom_E22965-08_3_RA3_01_4008.d	SwissProt-human-oReAlk2019_Mascot_2019-10-14 16:08:34	Protein Search
649.311	0.789485	1297.61	1297.61	68.2 (M.expect:0.0,M.score:68.2)	782 - 796	K.GESGPSGPAGPTGAR.G	430698	CO1A1_HUMAN	Collagen alpha-1(I) chain OS=Homo sapiens OX=9606 GN=COL1A1 PE=1 SV=5	1210		TRUE	1883	1296.61	649.31	1296.61	2	0.000512621	0.00102524	0.790097	4.45108	0.0041153	6.11342	0.00553819	14.7307	4	1		1	44.8865	0				CID	/Neuroblastom-Imaging/Imaging-Sample1/ZW_Neuroblastom_E22965-08_3_RA3_01_4008.d/+MS2(649.3107), 33.0eV, 14.7min #2488	ZW_Neuroblastom_E22965-08_3_RA3_01_4008.d	SwissProt-human-oReAlk2019_Mascot_2019-10-14 16:08:34	Protein Search
649.311	1.85215	1297.62	1297.61	45.1 (M.expect:0.0,M.score:45.1)	782 - 796	K.GESGPSGPAGPTGAR.G	218314	CO1A1_HUMAN	Collagen alpha-1(I) chain OS=Homo sapiens OX=9606 GN=COL1A1 PE=1 SV=5	1211		TRUE	5729	1296.61	649.31	1296.61	2	0.00120262	0.00240524	1.85359	5.89935	0.00270157	17.6067	0.0115226	17.2579	4	1		1	30.0647	0				CID	/Neuroblastom-Imaging/Imaging-Sample1/ZW_Neuroblastom_E22965-08_3_RA3_01_4008.d/+MS2(649.3114), 33.0eV, 17.3min #3260	ZW_Neuroblastom_E22965-08_3_RA3_01_4008.d	SwissProt-human-oReAlk2019_Mascot_2019-10-14 16:08:34	Protein Search
649.312	2.06776	1297.62	1297.61	42.9 (M.expect:0.0,M.score:42.9)	782 - 796	K.GESGPSGPAGPTGAR.G	72146	CO1A1_HUMAN	Collagen alpha-1(I) chain OS=Homo sapiens OX=9606 GN=COL1A1 PE=1 SV=5	1212		TRUE	4197	1296.61	649.31	1296.61	2	0.00134262	0.00268524	2.06937	4.53552	0.00272784	8.89767	0.00672477	17.2086	4	1		1	29.4328	0				CID	/Neuroblastom-Imaging/Imaging-Sample1/ZW_Neuroblastom_E22965-08_3_RA3_01_4008.d/+MS2(649.3115), 33.0eV, 17.2min #3246	ZW_Neuroblastom_E22965-08_3_RA3_01_4008.d	SwissProt-human-oReAlk2019_Mascot_2019-10-14 16:08:34	Protein Search
777.39	-0.494508	1553.77	1553.77	27.6 (M.expect:0.0,M.score:27.6)	171 - 187	K.STGGISVPGPMGPSGPR.G	34210	CO1A1_HUMAN	Collagen alpha-1(I) chain OS=Homo sapiens OX=9606 GN=COL1A1 PE=1 SV=5	2122		TRUE	5797	1552.77	777.391	1552.77	2	-0.000384426	-0.000768851	-0.494829	7.57399	0.00597956	54.4046	0.0157449	37.3531	5	1		1	29.8658	0				CID	/Neuroblastom-Imaging/Imaging-Sample1/ZW_Neuroblastom_E22965-08_3_RA3_01_4008.d/+MS2(777.3903), 42.3eV, 37.4min #10344	ZW_Neuroblastom_E22965-08_3_RA3_01_4008.d	SwissProt-human-oReAlk2019_Mascot_2019-10-14 16:08:34	Protein Search
777.391	0.135806	1553.77	1553.77	47.6 (M.expect:0.0,M.score:47.6)	171 - 187	K.STGGISVPGPMGPSGPR.G	1335558	CO1A1_HUMAN	Collagen alpha-1(I) chain OS=Homo sapiens OX=9606 GN=COL1A1 PE=1 SV=5	2123		TRUE	1363	1552.77	777.391	1552.77	2	0.000105574	0.000211149	0.135894	4.92934	0.00361176	13.4837	0.00883403	37.5017	5	1		1	47.6484	0				CID	/Neuroblastom-Imaging/Imaging-Sample1/ZW_Neuroblastom_E22965-08_3_RA3_01_4008.d/+MS2(777.3908), 36.9eV, 37.5min #10396	ZW_Neuroblastom_E22965-08_3_RA3_01_4008.d	SwissProt-human-oReAlk2019_Mascot_2019-10-14 16:08:34	Protein Search
777.391	0.753256	1553.78	1553.77	60.6 (M.expect:0.0,M.score:60.6)	171 - 187	K.STGGISVPGPMGPSGPR.G	1147712	CO1A1_HUMAN	Collagen alpha-1(I) chain OS=Homo sapiens OX=9606 GN=COL1A1 PE=1 SV=5	2124		TRUE	631	1552.77	777.391	1552.77	2	0.000585574	0.00117115	0.753744	4.3346	0.0028684	7.38954	0.00863696	37.4472	5	1		1	48.1871	0				CID	/Neuroblastom-Imaging/Imaging-Sample1/ZW_Neuroblastom_E22965-08_3_RA3_01_4008.d/+MS2(777.3913), 42.3eV, 37.4min #10372	ZW_Neuroblastom_E22965-08_3_RA3_01_4008.d	SwissProt-human-oReAlk2019_Mascot_2019-10-14 16:08:34	Protein Search
777.391	0.869027	1553.78	1553.77	69.7 (M.expect:0.0,M.score:69.7)	171 - 187	K.STGGISVPGPMGPSGPR.G	335936	CO1A1_HUMAN	Collagen alpha-1(I) chain OS=Homo sapiens OX=9606 GN=COL1A1 PE=1 SV=5	2125		TRUE	2797	1552.77	777.391	1552.77	2	0.000675574	0.00135115	0.869591	9.20227	0.00542006	13.8665	0.0108047	37.3951	5	1		1	40.8302	0				CID	/Neuroblastom-Imaging/Imaging-Sample1/ZW_Neuroblastom_E22965-08_3_RA3_01_4008.d/+MS2(777.3913), 42.3eV, 37.4min #10352	ZW_Neuroblastom_E22965-08_3_RA3_01_4008.d	SwissProt-human-oReAlk2019_Mascot_2019-10-14 16:08:34	Protein Search
777.391	0.869027	1553.78	1553.77	54.7 (M.expect:0.0,M.score:54.7)	171 - 187	K.STGGISVPGPMGPSGPR.G	335936	CO1A1_HUMAN	Collagen alpha-1(I) chain OS=Homo sapiens OX=9606 GN=COL1A1 PE=1 SV=5	2126		TRUE	597	1552.77	777.391	1552.77	2	0.000675574	0.00135115	0.869591	4.12478	0.00310658	7.79835	0.00459493	37.404	5	1		1	45.4533	0				CID	/Neuroblastom-Imaging/Imaging-Sample1/ZW_Neuroblastom_E22965-08_3_RA3_01_4008.d/+MS2(777.3913), 36.9eV, 37.4min #10363	ZW_Neuroblastom_E22965-08_3_RA3_01_4008.d	SwissProt-human-oReAlk2019_Mascot_2019-10-14 16:08:34	Protein Search
785.388	0.252199	1569.77	1569.77	15.6 (M.expect:0.0,M.score:15.6)	171 - 187	K.STGGISVPGPMGPSGPR.G	158232	CO1A1_HUMAN	Collagen alpha-1(I) chain OS=Homo sapiens OX=9606 GN=COL1A1 PE=1 SV=5	2183		TRUE	10162	1568.76	785.388	1568.76	2	0.000198074	0.000396149	0.252361	12.498	0.00491855	17.0845	0.00616339	33.9126	1	1		1	32.4605	0	Oxidation: 11			CID	/Neuroblastom-Imaging/Imaging-Sample1/ZW_Neuroblastom_E22965-08_3_RA3_01_4008.d/+MS2(785.3883), 43.2eV, 33.9min #9188	ZW_Neuroblastom_E22965-08_3_RA3_01_4008.d	SwissProt-human-oReAlk2019_Mascot_2019-10-14 16:08:34	Protein Search
564.259	-8.68082	1690.76	1690.78	18.3 (M.expect:0.0,M.score:18.3)	613 - 631	K.DGEAGAQGPPGPAGPAGER.G	341032	CO1A1_HUMAN	Collagen alpha-1(I) chain OS=Homo sapiens OX=9606 GN=COL1A1 PE=1 SV=5	2621		TRUE	3544	1689.76	564.264	1689.77	3	-0.00489824	-0.0146947	-8.69117	5.787	0.00343031	7.9888	0.00509486	26.3075	4	1		1	10.9802	0				CID	/Neuroblastom-Imaging/Imaging-Sample1/ZW_Neuroblastom_E22965-08_3_RA3_01_4008.d/+MS2(564.2593), 26.3eV, 26.3min #6514	ZW_Neuroblastom_E22965-08_3_RA3_01_4008.d	SwissProt-human-oReAlk2019_Mascot_2019-10-14 16:08:34	Protein Search
845.893	0.858113	1690.78	1690.78	47.4 (M.expect:0.0,M.score:47.4)	613 - 631	K.DGEAGAQGPPGPAGPAGER.G	256280	CO1A1_HUMAN	Collagen alpha-1(I) chain OS=Homo sapiens OX=9606 GN=COL1A1 PE=1 SV=5	2622		TRUE	4464	1689.77	845.893	1689.77	2	0.000725872	0.00145174	0.858624	13.3698	0.0105827	43.0086	0.0169176	26.3091	4	1		1	16.8083	0				CID	/Neuroblastom-Imaging/Imaging-Sample1/ZW_Neuroblastom_E22965-08_3_RA3_01_4008.d/+MS2(845.8933), 47.3eV, 26.3min #6517	ZW_Neuroblastom_E22965-08_3_RA3_01_4008.d	SwissProt-human-oReAlk2019_Mascot_2019-10-14 16:08:34	Protein Search
845.893	1.0118	1690.78	1690.78	82.9 (M.expect:0.0,M.score:82.9)	613 - 631	K.DGEAGAQGPPGPAGPAGER.G	778582	CO1A1_HUMAN	Collagen alpha-1(I) chain OS=Homo sapiens OX=9606 GN=COL1A1 PE=1 SV=5	2623		TRUE	780	1689.77	845.893	1689.77	2	0.000855872	0.00171174	1.0124	5.09878	0.00393596	12.9829	0.011713	23.8331	4	1		1	43.5713	0				CID	/Neuroblastom-Imaging/Imaging-Sample1/ZW_Neuroblastom_E22965-08_3_RA3_01_4008.d/+MS2(845.8935), 47.3eV, 23.8min #5606	ZW_Neuroblastom_E22965-08_3_RA3_01_4008.d	SwissProt-human-oReAlk2019_Mascot_2019-10-14 16:08:34	Protein Search
845.894	2.2058	1690.78	1690.78	58.9 (M.expect:0.0,M.score:58.9)	613 - 631	K.DGEAGAQGPPGPAGPAGER.G	162194	CO1A1_HUMAN	Collagen alpha-1(I) chain OS=Homo sapiens OX=9606 GN=COL1A1 PE=1 SV=5	2624		TRUE	2588	1689.77	845.893	1689.77	2	0.00186587	0.00373174	2.20711	8.43353	0.00896424	17.2625	0.0149237	26.3628	4	1		1	15.3962	0				CID	/Neuroblastom-Imaging/Imaging-Sample1/ZW_Neuroblastom_E22965-08_3_RA3_01_4008.d/+MS2(845.8945), 42.3eV, 26.4min #6541	ZW_Neuroblastom_E22965-08_3_RA3_01_4008.d	SwissProt-human-oReAlk2019_Mascot_2019-10-14 16:08:34	Protein Search
475.259	1.16438	949.511	949.51	57.0 (M.expect:0.0,M.score:57.0)	1,140 - 1,150	R.GPVGPSGPPGK.D	239632	CO3A1_HUMAN	Collagen alpha-1(III) chain OS=Homo sapiens OX=9606 GN=COL3A1 PE=1 SV=4	226		TRUE	8243	948.504	475.259	948.503	2	0.000553382	0.00110676	1.16561	3.73617	0.00149181	4.06442	0.0019091	18.2425	2	1		1	30.6999	0				CID	/Neuroblastom-Imaging/Imaging-Sample1/ZW_Neuroblastom_E22965-08_3_RA3_01_4008.d/+MS2(475.2593), 26.0eV, 18.2min #3563	ZW_Neuroblastom_E22965-08_3_RA3_01_4008.d	SwissProt-human-oReAlk2019_Mascot_2019-10-14 16:08:34	Protein Search
475.26	2.78454	949.513	949.51	55.5 (M.expect:0.0,M.score:55.5)	1,140 - 1,150	R.GPVGPSGPPGK.D	449854	CO3A1_HUMAN	Collagen alpha-1(III) chain OS=Homo sapiens OX=9606 GN=COL3A1 PE=1 SV=4	227		TRUE	2582	948.506	475.259	948.503	2	0.00132338	0.00264676	2.7875	3.96881	0.00131743	6.73392	0.0038132	16.0185	2	1		1	40.1703	0				CID	/Neuroblastom-Imaging/Imaging-Sample1/ZW_Neuroblastom_E22965-08_3_RA3_01_4008.d/+MS2(475.2600), 26.0eV, 16.0min #2888	ZW_Neuroblastom_E22965-08_3_RA3_01_4008.d	SwissProt-human-oReAlk2019_Mascot_2019-10-14 16:08:34	Protein Search
625.829	1.26873	1250.65	1250.65	36.5 (M.expect:0.0,M.score:36.5)	712 - 722	R.DQLLPPSPNNR.I	137594	CO6A1_HUMAN	Collagen alpha-1(VI) chain OS=Homo sapiens OX=9606 GN=COL6A1 PE=1 SV=3	1030		TRUE	7153	1249.64	625.828	1249.64	2	0.000794008	0.00158802	1.26975	4.51827	0.0029265	9.98107	0.00382881	32.09	1	1		1	41.4141	0				CID	/Neuroblastom-Imaging/Imaging-Sample1/ZW_Neuroblastom_E22965-08_3_RA3_01_4008.d/+MS2(625.8288), 33.0eV, 32.1min #8557	ZW_Neuroblastom_E22965-08_3_RA3_01_4008.d	SwissProt-human-oReAlk2019_Mascot_2019-10-14 16:08:34	Protein Search
527.62	1.8314	1580.85	1580.84	38.5 (M.expect:0.0,M.score:38.5)	186 - 199	K.VFSVAITPDHLEPR.L	97756	CO6A1_HUMAN	Collagen alpha-1(VI) chain OS=Homo sapiens OX=9606 GN=COL6A1 PE=1 SV=3	2219		TRUE	10469	1579.84	527.619	1579.84	3	0.000966284	0.00289885	1.83374	6.42843	0.00338782	8.74032	0.00576522	42.3916	1	1		1	17.8887	0				CID	/Neuroblastom-Imaging/Imaging-Sample1/ZW_Neuroblastom_E22965-08_3_RA3_01_4008.d/+MS2(527.6202), 25.6eV, 42.4min #11905	ZW_Neuroblastom_E22965-08_3_RA3_01_4008.d	SwissProt-human-oReAlk2019_Mascot_2019-10-14 16:08:34	Protein Search
966.507	-0.392904	1932.01	1932.01	75.7 (M.expect:0.0,M.score:75.7)	939 - 957	R.LLLFSDGNSQGATPAAIEK.A	71428	CO6A1_HUMAN	Collagen alpha-1(VI) chain OS=Homo sapiens OX=9606 GN=COL6A1 PE=1 SV=3	3291		TRUE	9750	1931	966.507	1931	2	-0.000379745	-0.000759489	-0.393109	4.89689	0.00383472	8.45378	0.00554471	50.1069	2	1		1	32.3049	0				CID	/Neuroblastom-Imaging/Imaging-Sample1/ZW_Neuroblastom_E22965-08_3_RA3_01_4008.d/+MS2(966.5069), 53.4eV, 50.1min #14050	ZW_Neuroblastom_E22965-08_3_RA3_01_4008.d	SwissProt-human-oReAlk2019_Mascot_2019-10-14 16:08:34	Protein Search
966.507	-0.392904	1932.01	1932.01	54.4 (M.expect:0.0,M.score:54.4)	939 - 957	R.LLLFSDGNSQGATPAAIEK.A	36580	CO6A1_HUMAN	Collagen alpha-1(VI) chain OS=Homo sapiens OX=9606 GN=COL6A1 PE=1 SV=3	3292		TRUE	10440	1931	966.507	1931	2	-0.000379745	-0.000759489	-0.393109	9.00687	0.00824288	11.8676	0.0128346	52.7738	2	1		1	24.0558	0				CID	/Neuroblastom-Imaging/Imaging-Sample1/ZW_Neuroblastom_E22965-08_3_RA3_01_4008.d/+MS2(966.5069), 53.4eV, 52.8min #14758	ZW_Neuroblastom_E22965-08_3_RA3_01_4008.d	SwissProt-human-oReAlk2019_Mascot_2019-10-14 16:08:34	Protein Search
676.346	-0.633603	1351.68	1351.69	36.2 (M.expect:0.0,M.score:36.2)	1,852 - 1,863	R.VYDPSTSTLNVR.W	156600	COCA1_HUMAN	Collagen alpha-1(XII) chain OS=Homo sapiens OX=9606 GN=COL12A1 PE=1 SV=2	1433		TRUE	7630	1350.68	676.346	1350.68	2	-0.000428535	-0.000857069	-0.634075	3.70587	0.00140253	8.49384	0.00409657	31.3012	1	1		1	30.7585	0				CID	/Neuroblastom-Imaging/Imaging-Sample1/ZW_Neuroblastom_E22965-08_3_RA3_01_4008.d/+MS2(676.3458), 33.0eV, 31.3min #8282	ZW_Neuroblastom_E22965-08_3_RA3_01_4008.d	SwissProt-human-oReAlk2019_Mascot_2019-10-14 16:08:34	Protein Search
502.628	1.45395	1505.87	1505.87	15.1 (M.expect:0.0,M.score:15.1)	1,561 - 1,573	R.EVTLPLPRPQDLK.L	93514	COCA1_HUMAN	Collagen alpha-1(XII) chain OS=Homo sapiens OX=9606 GN=COL12A1 PE=1 SV=2	1949		TRUE	11347	1504.86	502.628	1504.86	3	0.000730795	0.00219238	1.45589	3.95936	0.00309833	6.78659	0.00389502	43.5311	1	1		1	17.6369	0				CID	/Neuroblastom-Imaging/Imaging-Sample1/ZW_Neuroblastom_E22965-08_3_RA3_01_4008.d/+MS2(502.6284), 25.1eV, 43.5min #12241	ZW_Neuroblastom_E22965-08_3_RA3_01_4008.d	SwissProt-human-oReAlk2019_Mascot_2019-10-14 16:08:34	Protein Search
858.437	-2.42322	1715.87	1715.87	29.8 (M.expect:0.0,M.score:29.8)	1,939 - 1,953	R.NVQVYNPTPNSLDVR.W	36524	COCA1_HUMAN	Collagen alpha-1(XII) chain OS=Homo sapiens OX=9606 GN=COL12A1 PE=1 SV=2	2743		TRUE	6785	1714.86	858.439	1714.86	2	-0.00208018	-0.00416036	-2.42464	11.5713	0.00753415	15.0549	0.00922831	38.7019	1	1		1	24.6511	0				CID	/Neuroblastom-Imaging/Imaging-Sample1/ZW_Neuroblastom_E22965-08_3_RA3_01_4008.d/+MS2(858.4371), 47.9eV, 38.7min #10787	ZW_Neuroblastom_E22965-08_3_RA3_01_4008.d	SwissProt-human-oReAlk2019_Mascot_2019-10-14 16:08:34	Protein Search
947.02	-2.10592	1893.03	1893.04	32.9 (M.expect:0.0,M.score:32.9)	1,055 - 1,070	R.LQPQTTYDITVLPIYK.M	16866	COCA1_HUMAN	Collagen alpha-1(XII) chain OS=Homo sapiens OX=9606 GN=COL12A1 PE=1 SV=2	3142		TRUE	13566	1892.03	947.022	1892.03	2	-0.00199435	-0.0039887	-2.10704	8.6155	0.00522517	11.8375	0.00579029	56.8575	1	1		1	10.7516	0				CID	/Neuroblastom-Imaging/Imaging-Sample1/ZW_Neuroblastom_E22965-08_3_RA3_01_4008.d/+MS2(947.0200), 52.4eV, 56.9min #15856	ZW_Neuroblastom_E22965-08_3_RA3_01_4008.d	SwissProt-human-oReAlk2019_Mascot_2019-10-14 16:08:34	Protein Search
704.008	1.54366	2110.01	2110	21.5 (M.expect:0.0,M.score:21.5)	1,785 - 1,804	R.ITYQPSTGEGNEQTTTIGGR.Q	35194	COCA1_HUMAN	Collagen alpha-1(XII) chain OS=Homo sapiens OX=9606 GN=COL12A1 PE=1 SV=2	3604		TRUE	2992	2109	704.006	2109	3	0.00108675	0.00326024	1.54513	13.1138	0.0122163	15.3833	0.0144247	29.385	3	1		1	12.3206	0				CID	/Neuroblastom-Imaging/Imaging-Sample1/ZW_Neuroblastom_E22965-08_3_RA3_01_4008.d/+MS2(704.0075), 27.6eV, 29.4min #7629	ZW_Neuroblastom_E22965-08_3_RA3_01_4008.d	SwissProt-human-oReAlk2019_Mascot_2019-10-14 16:08:34	Protein Search
1055.51	-0.034726	2110	2110	47.2 (M.expect:0.0,M.score:47.2)	1,785 - 1,804	R.ITYQPSTGEGNEQTTTIGGR.Q	29318	COCA1_HUMAN	Collagen alpha-1(XII) chain OS=Homo sapiens OX=9606 GN=COL12A1 PE=1 SV=2	3605		TRUE	5412	2109	1055.51	2109	2	-3.66535e-05	-7.33071e-05	-0.0347426	6.00612	0.00717261	11.8158	0.0123845	29.3395	3	1		1	21.4551	0				CID	/Neuroblastom-Imaging/Imaging-Sample1/ZW_Neuroblastom_E22965-08_3_RA3_01_4008.d/+MS2(1055.5060), 60.6eV, 29.4min #7617	ZW_Neuroblastom_E22965-08_3_RA3_01_4008.d	SwissProt-human-oReAlk2019_Mascot_2019-10-14 16:08:34	Protein Search
1055.51	0.884264	2110.01	2110	52.1 (M.expect:0.0,M.score:52.1)	1,785 - 1,804	R.ITYQPSTGEGNEQTTTIGGR.Q	126304	COCA1_HUMAN	Collagen alpha-1(XII) chain OS=Homo sapiens OX=9606 GN=COL12A1 PE=1 SV=2	3606		TRUE	10247	2109	1055.51	2109	2	0.000933346	0.00186669	0.884686	5.33403	0.00365167	6.98485	0.00556393	29.3818	3	1		1	18.101	0				CID	/Neuroblastom-Imaging/Imaging-Sample1/ZW_Neuroblastom_E22965-08_3_RA3_01_4008.d/+MS2(1055.5069), 60.6eV, 29.4min #7626	ZW_Neuroblastom_E22965-08_3_RA3_01_4008.d	SwissProt-human-oReAlk2019_Mascot_2019-10-14 16:08:34	Protein Search
777.077	0.33332	2329.22	2329.21	39.7 (M.expect:0.0,M.score:39.7)	1,966 - 1,987	R.VVYSPVDGTRPSESIVVPGNTR.M	24222	COCA1_HUMAN	Collagen alpha-1(XII) chain OS=Homo sapiens OX=9606 GN=COL12A1 PE=1 SV=2	3753		TRUE	7043	2328.21	777.076	2328.21	3	0.000259015	0.000777045	0.333608	5.69238	0.00411706	15.4947	0.0101539	39.8868	1	1		1	23.0769	0				CID	/Neuroblastom-Imaging/Imaging-Sample1/ZW_Neuroblastom_E22965-08_3_RA3_01_4008.d/+MS2(777.0767), 37.1eV, 39.9min #11157	ZW_Neuroblastom_E22965-08_3_RA3_01_4008.d	SwissProt-human-oReAlk2019_Mascot_2019-10-14 16:08:34	Protein Search
783.74	-0.725132	2349.21	2349.21	38.3 (M.expect:0.0,M.score:38.3)	2,057 - 2,077	R.IIYSPTVGDPIDEYTTVPGRR.N	74262	COCA1_HUMAN	Collagen alpha-1(XII) chain OS=Homo sapiens OX=9606 GN=COL12A1 PE=1 SV=2	3758		TRUE	10833	2348.2	783.741	2348.2	3	-0.000568315	-0.00170494	-0.725753	5.15334	0.00550859	8.61204	0.0106247	47.2436	1	1		1	33.3387	1				CID	/Neuroblastom-Imaging/Imaging-Sample1/ZW_Neuroblastom_E22965-08_3_RA3_01_4008.d/+MS2(783.7404), 37.9eV, 47.2min #13277	ZW_Neuroblastom_E22965-08_3_RA3_01_4008.d	SwissProt-human-oReAlk2019_Mascot_2019-10-14 16:08:34	Protein Search
789.402	1.17593	2366.19	2366.19	35.2 (M.expect:0.0,M.score:35.2)	1,813 - 1,834	K.LKPDTPYTITVSSLYPDGEGGR.M	23402	COCA1_HUMAN	Collagen alpha-1(XII) chain OS=Homo sapiens OX=9606 GN=COL12A1 PE=1 SV=2	3767		TRUE	10573	2365.18	789.401	2365.18	3	0.000928283	0.00278485	1.17693	10.4627	0.0114971	15.3929	0.0159193	47.044	1	1		1	12.9246	0				CID	/Neuroblastom-Imaging/Imaging-Sample1/ZW_Neuroblastom_E22965-08_3_RA3_01_4008.d/+MS2(789.4016), 38.7eV, 47.1min #13226	ZW_Neuroblastom_E22965-08_3_RA3_01_4008.d	SwissProt-human-oReAlk2019_Mascot_2019-10-14 16:08:34	Protein Search
488.248	0.0022583	975.489	975.489	22.8 (M.expect:0.0,M.score:22.8)	553 - 560	R.LTWDPTSR.Q	53542	COEA1_HUMAN	Collagen alpha-1(XIV) chain OS=Homo sapiens OX=9606 GN=COL14A1 PE=1 SV=3	271		TRUE	5781	974.482	488.248	974.482	2	1.10261e-06	2.20522e-06	0.00226063	3.52844	0.00194325	3.70617	0.00236396	31.5184	1	1		1	16.3457	0				CID	/Neuroblastom-Imaging/Imaging-Sample1/ZW_Neuroblastom_E22965-08_3_RA3_01_4008.d/+MS2(488.2483), 26.5eV, 31.5min #8355	ZW_Neuroblastom_E22965-08_3_RA3_01_4008.d	SwissProt-human-oReAlk2019_Mascot_2019-10-14 16:08:34	Protein Search
624.845	-1.30125	1248.68	1248.68	41.0 (M.expect:0.0,M.score:41.0)	284 - 295	R.ESGVELFAIGVK.N	18784	COEA1_HUMAN	Collagen alpha-1(XIV) chain OS=Homo sapiens OX=9606 GN=COL14A1 PE=1 SV=3	1023		TRUE	10688	1247.67	624.845	1247.68	2	-0.000813078	-0.00162616	-1.3023	4.94246	0.00179852	5.52064	0.00195786	51.9013	1	1		1	22.3005	0				CID	/Neuroblastom-Imaging/Imaging-Sample1/ZW_Neuroblastom_E22965-08_3_RA3_01_4008.d/+MS2(624.8445), 33.0eV, 51.9min #14518	ZW_Neuroblastom_E22965-08_3_RA3_01_4008.d	SwissProt-human-oReAlk2019_Mascot_2019-10-14 16:08:34	Protein Search
695.863	1.16009	1390.72	1390.72	24.5 (M.expect:0.0,M.score:24.5)	740 - 752	R.NLVVGDETTSSLR.V	139734	COEA1_HUMAN	Collagen alpha-1(XIV) chain OS=Homo sapiens OX=9606 GN=COL14A1 PE=1 SV=3	1601		TRUE	9427	1389.71	695.862	1389.71	2	0.000807261	0.00161452	1.16093	6.71717	0.00408018	10.8873	0.00495049	33.1875	1	1		1	35.303	0				CID	/Neuroblastom-Imaging/Imaging-Sample1/ZW_Neuroblastom_E22965-08_3_RA3_01_4008.d/+MS2(695.8631), 33.0eV, 33.2min #8937	ZW_Neuroblastom_E22965-08_3_RA3_01_4008.d	SwissProt-human-oReAlk2019_Mascot_2019-10-14 16:08:34	Protein Search
596.32	0.510852	1786.95	1786.94	30.9 (M.expect:0.0,M.score:30.9)	1,635 - 1,650	R.YTAILNQIPSHSSSIR.T	102518	COEA1_HUMAN	Collagen alpha-1(XIV) chain OS=Homo sapiens OX=9606 GN=COL14A1 PE=1 SV=3	2964		TRUE	7260	1785.94	596.32	1785.94	3	0.000304632	0.000913895	0.511428	9.49284	0.00656586	11.5603	0.00827409	33.7586	1	1		1	20.5804	0				CID	/Neuroblastom-Imaging/Imaging-Sample1/ZW_Neuroblastom_E22965-08_3_RA3_01_4008.d/+MS2(596.3200), 26.9eV, 33.8min #9135	ZW_Neuroblastom_E22965-08_3_RA3_01_4008.d	SwissProt-human-oReAlk2019_Mascot_2019-10-14 16:08:34	Protein Search
708.043	0.397208	2122.11	2122.11	38.2 (M.expect:0.0,M.score:38.2)	347 - 367	K.ASAHAITGPPTELITSEVTAR.S	19888	COEA1_HUMAN	Collagen alpha-1(XIV) chain OS=Homo sapiens OX=9606 GN=COL14A1 PE=1 SV=3	3616		TRUE	3077	2121.11	708.043	2121.11	3	0.000281241	0.000843722	0.397585	5.77887	0.00463674	8.44941	0.00599275	42.1439	2	1		1	19.6242	0				CID	/Neuroblastom-Imaging/Imaging-Sample1/ZW_Neuroblastom_E22965-08_3_RA3_01_4008.d/+MS2(708.0431), 28.1eV, 42.2min #11836	ZW_Neuroblastom_E22965-08_3_RA3_01_4008.d	SwissProt-human-oReAlk2019_Mascot_2019-10-14 16:08:34	Protein Search
708.043	0.877405	2122.12	2122.11	33.0 (M.expect:0.0,M.score:33.0)	347 - 367	K.ASAHAITGPPTELITSEVTAR.S	73566	COEA1_HUMAN	Collagen alpha-1(XIV) chain OS=Homo sapiens OX=9606 GN=COL14A1 PE=1 SV=3	3617		TRUE	5476	2121.11	708.043	2121.11	3	0.000621241	0.00186372	0.878238	7.00745	0.0043354	9.85136	0.00706139	42.2412	2	1		1	16.2559	0				CID	/Neuroblastom-Imaging/Imaging-Sample1/ZW_Neuroblastom_E22965-08_3_RA3_01_4008.d/+MS2(708.0434), 28.1eV, 42.2min #11863	ZW_Neuroblastom_E22965-08_3_RA3_01_4008.d	SwissProt-human-oReAlk2019_Mascot_2019-10-14 16:08:34	Protein Search
795.422	-0.722193	1589.84	1589.84	34.0 (M.expect:0.0,M.score:34.0)	1,344 - 1,360	R.TADTAVTGLASPLSTGK.I	38350	COFA1_HUMAN	Collagen alpha-1(XV) chain OS=Homo sapiens OX=9606 GN=COL15A1 PE=1 SV=2	2252		TRUE	9869	1588.83	795.423	1588.83	2	-0.000574448	-0.0011489	-0.72265	10.6667	0.00723402	23.0421	0.00936513	40.301	1	1		1	15.2128	0				CID	/Neuroblastom-Imaging/Imaging-Sample1/ZW_Neuroblastom_E22965-08_3_RA3_01_4008.d/+MS2(795.4221), 44.5eV, 40.3min #11289	ZW_Neuroblastom_E22965-08_3_RA3_01_4008.d	SwissProt-human-oReAlk2019_Mascot_2019-10-14 16:08:34	Protein Search
420.738	1.20886	840.47	840.469	18.8 (M.expect:0.0,M.score:18.8)	157 - 165	R.GVVGPQGAR.G	1026570	CO1A2_HUMAN	Collagen alpha-2(I) chain OS=Homo sapiens OX=9606 GN=COL1A2 PE=1 SV=7	66		TRUE	380	839.462	420.738	839.461	2	0.000508613	0.00101723	1.21031	17.543	0.00899051	22.6324	0.0146305	14.451	4	1		1	47.3558	0				CID	/Neuroblastom-Imaging/Imaging-Sample1/ZW_Neuroblastom_E22965-08_3_RA3_01_4008.d/+MS2(420.7385), 23.8eV, 14.5min #2322	ZW_Neuroblastom_E22965-08_3_RA3_01_4008.d	SwissProt-human-oReAlk2019_Mascot_2019-10-14 16:08:34	Protein Search
420.739	2.2071	840.47	840.469	43.8 (M.expect:0.0,M.score:43.8)	157 - 165	R.GVVGPQGAR.G	354696	CO1A2_HUMAN	Collagen alpha-2(I) chain OS=Homo sapiens OX=9606 GN=COL1A2 PE=1 SV=7	67		TRUE	6241	839.463	420.738	839.461	2	0.000928613	0.00185723	2.20975	5.53029	0.00170596	14.9043	0.011042	16.7944	4	1		1	46.4109	0				CID	/Neuroblastom-Imaging/Imaging-Sample1/ZW_Neuroblastom_E22965-08_3_RA3_01_4008.d/+MS2(420.7389), 23.8eV, 16.8min #3120	ZW_Neuroblastom_E22965-08_3_RA3_01_4008.d	SwissProt-human-oReAlk2019_Mascot_2019-10-14 16:08:34	Protein Search
420.739	2.39724	840.471	840.469	14.3 (M.expect:0.0,M.score:14.3)	157 - 165	R.GVVGPQGAR.G	33562	CO1A2_HUMAN	Collagen alpha-2(I) chain OS=Homo sapiens OX=9606 GN=COL1A2 PE=1 SV=7	68		TRUE	5335	839.463	420.738	839.461	2	0.00100861	0.00201723	2.40012	7.70688	0.00226536	16.0155	0.0121841	15.0586	4	1		1	10.9575	0				CID	/Neuroblastom-Imaging/Imaging-Sample1/ZW_Neuroblastom_E22965-08_3_RA3_01_4008.d/+MS2(420.7390), 23.8eV, 15.1min #2601	ZW_Neuroblastom_E22965-08_3_RA3_01_4008.d	SwissProt-human-oReAlk2019_Mascot_2019-10-14 16:08:34	Protein Search
420.739	2.68245	840.471	840.469	17.3 (M.expect:0.0,M.score:17.3)	157 - 165	R.GVVGPQGAR.G	80540	CO1A2_HUMAN	Collagen alpha-2(I) chain OS=Homo sapiens OX=9606 GN=COL1A2 PE=1 SV=7	69		TRUE	6972	839.464	420.738	839.461	2	0.00112861	0.00225723	2.68567	9.84053	0.00668852	11.9454	0.00805853	16.7428	4	1		1	34.5671	0				CID	/Neuroblastom-Imaging/Imaging-Sample1/ZW_Neuroblastom_E22965-08_3_RA3_01_4008.d/+MS2(420.7391), 23.8eV, 16.7min #3105	ZW_Neuroblastom_E22965-08_3_RA3_01_4008.d	SwissProt-human-oReAlk2019_Mascot_2019-10-14 16:08:34	Protein Search
434.736	1.24513	868.465	868.464	20.7 (M.expect:0.0,M.score:20.7)	997 - 1,005	R.GPSGPQGIR.G	106412	CO1A2_HUMAN	Collagen alpha-2(I) chain OS=Homo sapiens OX=9606 GN=COL1A2 PE=1 SV=7	91		TRUE	2624	867.457	434.735	867.456	2	0.000541302	0.0010826	1.24657	4.54227	0.00306817	10.6977	0.00422706	15.2012	2	1		1	18.4226	0				CID	/Neuroblastom-Imaging/Imaging-Sample1/ZW_Neuroblastom_E22965-08_3_RA3_01_4008.d/+MS2(434.7359), 23.7eV, 15.2min #2640	ZW_Neuroblastom_E22965-08_3_RA3_01_4008.d	SwissProt-human-oReAlk2019_Mascot_2019-10-14 16:08:34	Protein Search
434.736	1.98121	868.465	868.464	19.7 (M.expect:0.0,M.score:19.7)	997 - 1,005	R.GPSGPQGIR.G	58198	CO1A2_HUMAN	Collagen alpha-2(I) chain OS=Homo sapiens OX=9606 GN=COL1A2 PE=1 SV=7	92		TRUE	5800	867.458	434.735	867.456	2	0.000861302	0.0017226	1.9835	5.19514	0.00236821	6.09273	0.00300527	17.0022	2	1		1	21.8019	0				CID	/Neuroblastom-Imaging/Imaging-Sample1/ZW_Neuroblastom_E22965-08_3_RA3_01_4008.d/+MS2(434.7363), 23.7eV, 17.0min #3187	ZW_Neuroblastom_E22965-08_3_RA3_01_4008.d	SwissProt-human-oReAlk2019_Mascot_2019-10-14 16:08:34	Protein Search
408.544	3.65748	1223.62	1223.61	36.2 (M.expect:0.0,M.score:36.2)	1,054 - 1,067	R.GPAGPSGPAGKDGR.T	167852	CO1A2_HUMAN	Collagen alpha-2(I) chain OS=Homo sapiens OX=9606 GN=COL1A2 PE=1 SV=7	933		TRUE	1177	1222.61	408.542	1222.61	3	0.00149424	0.00448272	3.6635	11.6133	0.00948912	33.5206	0.0153349	14.5212	2	1		1	8.22471	1				CID	/Neuroblastom-Imaging/Imaging-Sample1/ZW_Neuroblastom_E22965-08_3_RA3_01_4008.d/+MS2(408.5439), 23.2eV, 14.5min #2387	ZW_Neuroblastom_E22965-08_3_RA3_01_4008.d	SwissProt-human-oReAlk2019_Mascot_2019-10-14 16:08:34	Protein Search
612.311	2.13876	1223.62	1223.61	33.8 (M.expect:0.0,M.score:33.8)	1,054 - 1,067	R.GPAGPSGPAGKDGR.T	211054	CO1A2_HUMAN	Collagen alpha-2(I) chain OS=Homo sapiens OX=9606 GN=COL1A2 PE=1 SV=7	934		TRUE	715	1222.61	612.31	1222.61	2	0.00130959	0.00261917	2.14052	5.97889	0.00400088	9.39598	0.00621443	14.4023	2	1		1	20.1984	1				CID	/Neuroblastom-Imaging/Imaging-Sample1/ZW_Neuroblastom_E22965-08_3_RA3_01_4008.d/+MS2(612.3113), 33.0eV, 14.4min #2294	ZW_Neuroblastom_E22965-08_3_RA3_01_4008.d	SwissProt-human-oReAlk2019_Mascot_2019-10-14 16:08:34	Protein Search
618.311	1.3417	1235.61	1235.61	56.8 (M.expect:0.0,M.score:56.8)	694 - 708	R.GEAGAAGPAGPAGPR.G	221444	CO1A2_HUMAN	Collagen alpha-2(I) chain OS=Homo sapiens OX=9606 GN=COL1A2 PE=1 SV=7	987		TRUE	5623	1234.61	618.31	1234.61	2	0.000829586	0.00165917	1.34279	5.09856	0.00213756	8.40831	0.00415654	18.243	2	1		1	38.4238	0				CID	/Neuroblastom-Imaging/Imaging-Sample1/ZW_Neuroblastom_E22965-08_3_RA3_01_4008.d/+MS2(618.3108), 33.0eV, 18.2min #3564	ZW_Neuroblastom_E22965-08_3_RA3_01_4008.d	SwissProt-human-oReAlk2019_Mascot_2019-10-14 16:08:34	Protein Search
618.312	3.23394	1235.62	1235.61	39.8 (M.expect:0.0,M.score:39.8)	694 - 708	R.GEAGAAGPAGPAGPR.G	1511032	CO1A2_HUMAN	Collagen alpha-2(I) chain OS=Homo sapiens OX=9606 GN=COL1A2 PE=1 SV=7	988		TRUE	279	1234.61	618.31	1234.61	2	0.00199959	0.00399917	3.23658	4.20511	0.00255287	8.5865	0.00942302	15.9667	2	1		1	49.5644	0				CID	/Neuroblastom-Imaging/Imaging-Sample1/ZW_Neuroblastom_E22965-08_3_RA3_01_4008.d/+MS2(618.3120), 33.0eV, 16.0min #2872	ZW_Neuroblastom_E22965-08_3_RA3_01_4008.d	SwissProt-human-oReAlk2019_Mascot_2019-10-14 16:08:34	Protein Search
698.366	0.219365	1395.72	1395.72	31.3 (M.expect:0.0,M.score:31.3)	85 - 99	K.GVGLGPGPMGLMGPR.G	51232	CO1A2_HUMAN	Collagen alpha-2(I) chain OS=Homo sapiens OX=9606 GN=COL1A2 PE=1 SV=7	1617		TRUE	9048	1394.72	698.365	1394.72	2	0.000153197	0.000306394	0.219524	5.14639	0.00290415	8.1955	0.00467229	49.1929	1	1		1	31.3497	0				CID	/Neuroblastom-Imaging/Imaging-Sample1/ZW_Neuroblastom_E22965-08_3_RA3_01_4008.d/+MS2(698.3656), 33.0eV, 49.2min #13805	ZW_Neuroblastom_E22965-08_3_RA3_01_4008.d	SwissProt-human-oReAlk2019_Mascot_2019-10-14 16:08:34	Protein Search
781.9	0.382557	1562.79	1562.79	44.2 (M.expect:0.0,M.score:44.2)	979 - 996	R.GETGPSGPVGPAGAVGPR.G	7606930	CO1A2_HUMAN	Collagen alpha-2(I) chain OS=Homo sapiens OX=9606 GN=COL1A2 PE=1 SV=7	2146		TRUE	1402	1561.79	781.9	1561.78	2	0.000299122	0.000598243	0.382804	3.69905	0.00206373	5.57712	0.00346052	28.8078	4	1		1	14.1727	0				CID	/Neuroblastom-Imaging/Imaging-Sample1/ZW_Neuroblastom_E22965-08_3_RA3_01_4008.d/+MS2(781.9000), 43.1eV, 28.8min #7424	ZW_Neuroblastom_E22965-08_3_RA3_01_4008.d	SwissProt-human-oReAlk2019_Mascot_2019-10-14 16:08:34	Protein Search
781.9	0.970867	1562.79	1562.79	101.8 (M.expect:0.0,M.score:101.8)	979 - 996	R.GETGPSGPVGPAGAVGPR.G	3813678	CO1A2_HUMAN	Collagen alpha-2(I) chain OS=Homo sapiens OX=9606 GN=COL1A2 PE=1 SV=7	2147		TRUE	105	1561.79	781.9	1561.78	2	0.000759122	0.00151824	0.971493	2.47763	0.00144287	3.57896	0.00310266	28.7526	4	1		1	59.4763	0				CID	/Neuroblastom-Imaging/Imaging-Sample1/ZW_Neuroblastom_E22965-08_3_RA3_01_4008.d/+MS2(781.9005), 42.8eV, 28.8min #7403	ZW_Neuroblastom_E22965-08_3_RA3_01_4008.d	SwissProt-human-oReAlk2019_Mascot_2019-10-14 16:08:34	Protein Search
781.901	1.02202	1562.79	1562.79	69.0 (M.expect:0.0,M.score:69.0)	979 - 996	R.GETGPSGPVGPAGAVGPR.G	107658	CO1A2_HUMAN	Collagen alpha-2(I) chain OS=Homo sapiens OX=9606 GN=COL1A2 PE=1 SV=7	2148		TRUE	9219	1561.79	781.9	1561.78	2	0.000799122	0.00159824	1.02268	5.87088	0.00365982	7.82763	0.0074921	28.6505	4	1		1	28.9669	0				CID	/Neuroblastom-Imaging/Imaging-Sample1/ZW_Neuroblastom_E22965-08_3_RA3_01_4008.d/+MS2(781.9005), 42.8eV, 28.7min #7371	ZW_Neuroblastom_E22965-08_3_RA3_01_4008.d	SwissProt-human-oReAlk2019_Mascot_2019-10-14 16:08:34	Protein Search
781.901	1.14992	1562.79	1562.79	103.1 (M.expect:0.0,M.score:103.1)	979 - 996	R.GETGPSGPVGPAGAVGPR.G	1001468	CO1A2_HUMAN	Collagen alpha-2(I) chain OS=Homo sapiens OX=9606 GN=COL1A2 PE=1 SV=7	2149		TRUE	652	1561.79	781.9	1561.78	2	0.000899122	0.00179824	1.15066	3.13677	0.00168703	3.83701	0.00303455	28.7014	4	1		1	49.921	0				CID	/Neuroblastom-Imaging/Imaging-Sample1/ZW_Neuroblastom_E22965-08_3_RA3_01_4008.d/+MS2(781.9006), 42.8eV, 28.7min #7385	ZW_Neuroblastom_E22965-08_3_RA3_01_4008.d	SwissProt-human-oReAlk2019_Mascot_2019-10-14 16:08:34	Protein Search
886.462	-0.442479	1771.92	1771.92	39.6 (M.expect:0.0,M.score:39.6)	1,141 - 1,156	K.SLNNQIETLLTPEGSR.K	44272	CO1A2_HUMAN	Collagen alpha-2(I) chain OS=Homo sapiens OX=9606 GN=COL1A2 PE=1 SV=7	2918		TRUE	6654	1770.91	886.463	1770.91	2	-0.000392241	-0.000784482	-0.442731	6.94606	0.00575622	10.3725	0.00854661	50.7217	1	1		1	13.8614	0				CID	/Neuroblastom-Imaging/Imaging-Sample1/ZW_Neuroblastom_E22965-08_3_RA3_01_4008.d/+MS2(886.4625), 49.3eV, 50.7min #14219	ZW_Neuroblastom_E22965-08_3_RA3_01_4008.d	SwissProt-human-oReAlk2019_Mascot_2019-10-14 16:08:34	Protein Search
507.511	2.52767	2027.02	2027.02	37.4 (M.expect:0.0,M.score:37.4)	975 - 996	K.HGNRGETGPSGPVGPAGAVGPR.G	314164	CO1A2_HUMAN	Collagen alpha-2(I) chain OS=Homo sapiens OX=9606 GN=COL1A2 PE=1 SV=7	3456		TRUE	1399	2026.01	507.51	2026.01	4	0.00128282	0.00513128	2.53144	7.19106	0.00566887	11.0846	0.0116932	19.8963	2	1		1	39.4787	1				CID	/Neuroblastom-Imaging/Imaging-Sample1/ZW_Neuroblastom_E22965-08_3_RA3_01_4008.d/+MS2(507.5109), 25.2eV, 19.9min #4122	ZW_Neuroblastom_E22965-08_3_RA3_01_4008.d	SwissProt-human-oReAlk2019_Mascot_2019-10-14 16:08:34	Protein Search
507.511	2.52767	2027.02	2027.02	15.7 (M.expect:0.0,M.score:15.7)	975 - 996	K.HGNRGETGPSGPVGPAGAVGPR.G	314164	CO1A2_HUMAN	Collagen alpha-2(I) chain OS=Homo sapiens OX=9606 GN=COL1A2 PE=1 SV=7	3457		TRUE	297	2026.01	507.51	2026.01	4	0.00128282	0.00513128	2.53144	11.9131	0.0077282	31.1555	0.0125297	19.9116	2	1		1	15.6568	1				CID	/Neuroblastom-Imaging/Imaging-Sample1/ZW_Neuroblastom_E22965-08_3_RA3_01_4008.d/+MS2(507.5109), 25.2eV, 19.9min #4137	ZW_Neuroblastom_E22965-08_3_RA3_01_4008.d	SwissProt-human-oReAlk2019_Mascot_2019-10-14 16:08:34	Protein Search
539.828	-1.91678	1078.65	1078.65	25.1 (M.expect:0.0,M.score:25.1)	1,485 - 1,494	R.SVSIGYLLVK.H	21158	CO4A2_HUMAN	Collagen alpha-2(IV) chain OS=Homo sapiens OX=9606 GN=COL4A2 PE=1 SV=4	519		TRUE	10805	1077.64	539.829	1077.64	2	-0.00103473	-0.00206946	-1.91857	11.688	0.00788263	16.2916	0.0135487	47.8155	2	1		1	19.981	0				CID	/Neuroblastom-Imaging/Imaging-Sample1/ZW_Neuroblastom_E22965-08_3_RA3_01_4008.d/+MS2(539.8279), 29.4eV, 47.8min #13437	ZW_Neuroblastom_E22965-08_3_RA3_01_4008.d	SwissProt-human-oReAlk2019_Mascot_2019-10-14 16:08:34	Protein Search
539.829	0.676636	1078.65	1078.65	29.7 (M.expect:0.0,M.score:29.7)	1,485 - 1,494	R.SVSIGYLLVK.H	90448	CO4A2_HUMAN	Collagen alpha-2(IV) chain OS=Homo sapiens OX=9606 GN=COL4A2 PE=1 SV=4	520		TRUE	11063	1077.64	539.829	1077.64	2	0.000365268	0.000730536	0.677268	2.89171	0.00141008	3.73808	0.00179628	47.9107	2	1		1	23.3984	0				CID	/Neuroblastom-Imaging/Imaging-Sample1/ZW_Neuroblastom_E22965-08_3_RA3_01_4008.d/+MS2(539.8293), 29.4eV, 47.9min #13457	ZW_Neuroblastom_E22965-08_3_RA3_01_4008.d	SwissProt-human-oReAlk2019_Mascot_2019-10-14 16:08:34	Protein Search
640.36	1.00991	1279.71	1279.71	52.3 (M.expect:0.0,M.score:52.3)	1,397 - 1,409	K.IAVQPGTVGPQGR.R	293038	CO4A2_HUMAN	Collagen alpha-2(IV) chain OS=Homo sapiens OX=9606 GN=COL4A2 PE=1 SV=4	1171		TRUE	3388	1278.71	640.359	1278.7	2	0.000646704	0.00129341	1.0107	2.33039	0.00141015	12.4493	0.0101249	26.0448	1	1		1	39.9797	0				CID	/Neuroblastom-Imaging/Imaging-Sample1/ZW_Neuroblastom_E22965-08_3_RA3_01_4008.d/+MS2(640.3601), 33.0eV, 26.0min #6419	ZW_Neuroblastom_E22965-08_3_RA3_01_4008.d	SwissProt-human-oReAlk2019_Mascot_2019-10-14 16:08:34	Protein Search
674.371	-1.75077	1347.74	1347.74	13.4 (M.expect:0.0,M.score:13.4)	771 - 784	R.GLPGEVLGAQPGPR.G	39176	CO4A2_HUMAN	Collagen alpha-2(IV) chain OS=Homo sapiens OX=9606 GN=COL4A2 PE=1 SV=4	1420		TRUE	4714	1346.73	674.373	1346.73	2	-0.00118067	-0.00236134	-1.75208	7.03388	0.00366933	15.6702	0.00582259	37.2491	1	1		1	16.5808	0				CID	/Neuroblastom-Imaging/Imaging-Sample1/ZW_Neuroblastom_E22965-08_3_RA3_01_4008.d/+MS2(674.3714), 33.0eV, 37.3min #10310	ZW_Neuroblastom_E22965-08_3_RA3_01_4008.d	SwissProt-human-oReAlk2019_Mascot_2019-10-14 16:08:34	Protein Search
934.488	-0.403736	1867.97	1867.97	41.9 (M.expect:0.0,M.score:41.9)	202 - 221	K.SGLGSQVGLMPGSVGPVGPR.G	31318	CO5A2_HUMAN	Collagen alpha-2(V) chain OS=Homo sapiens OX=9606 GN=COL5A2 PE=1 SV=3	3094		TRUE	7639	1866.96	934.488	1866.96	2	-0.000377287	-0.000754573	-0.403954	4.75459	0.00395231	10.8916	0.00544469	44.6064	1	1		1	15.6008	0	Oxidation: 10			CID	/Neuroblastom-Imaging/Imaging-Sample1/ZW_Neuroblastom_E22965-08_3_RA3_01_4008.d/+MS2(934.4880), 51.7eV, 44.6min #12542	ZW_Neuroblastom_E22965-08_3_RA3_01_4008.d	SwissProt-human-oReAlk2019_Mascot_2019-10-14 16:08:34	Protein Search
357.845	2.52971	1071.52	1071.52	17.9 (M.expect:0.0,M.score:17.9)	868 - 876	R.RDDDPLNAR.V	65414	CO6A2_HUMAN	Collagen alpha-2(VI) chain OS=Homo sapiens OX=9606 GN=COL6A2 PE=1 SV=4	492		TRUE	8291	1070.51	357.844	1070.51	3	0.000905246	0.00271574	2.53447	4.33222	0.00170862	5.62162	0.00219853	15.6116	1	1		1	15.9776	1				CID	/Neuroblastom-Imaging/Imaging-Sample1/ZW_Neuroblastom_E22965-08_3_RA3_01_4008.d/+MS2(357.8450), 23.0eV, 15.6min #2771	ZW_Neuroblastom_E22965-08_3_RA3_01_4008.d	SwissProt-human-oReAlk2019_Mascot_2019-10-14 16:08:34	Protein Search
607.848	0.131418	1214.69	1214.69	38.0 (M.expect:0.0,M.score:38.0)	187 - 197	R.LFAVAPNQNLK.E	132098	CO6A2_HUMAN	Collagen alpha-2(VI) chain OS=Homo sapiens OX=9606 GN=COL6A2 PE=1 SV=4	913		TRUE	7724	1213.68	607.848	1213.68	2	7.98825e-05	0.000159765	0.131527	4.91626	0.00266528	11.6759	0.00786841	35.3721	2	1		1	30.7836	0				CID	/Neuroblastom-Imaging/Imaging-Sample1/ZW_Neuroblastom_E22965-08_3_RA3_01_4008.d/+MS2(607.8483), 33.0eV, 35.4min #9680	ZW_Neuroblastom_E22965-08_3_RA3_01_4008.d	SwissProt-human-oReAlk2019_Mascot_2019-10-14 16:08:34	Protein Search
607.849	0.526254	1214.69	1214.69	30.4 (M.expect:0.0,M.score:30.4)	187 - 197	R.LFAVAPNQNLK.E	428144	CO6A2_HUMAN	Collagen alpha-2(VI) chain OS=Homo sapiens OX=9606 GN=COL6A2 PE=1 SV=4	914		TRUE	3972	1213.68	607.848	1213.68	2	0.000319883	0.000639765	0.52669	3.26774	0.00224149	4.11489	0.00284097	35.4243	2	1		1	44.9005	0				CID	/Neuroblastom-Imaging/Imaging-Sample1/ZW_Neuroblastom_E22965-08_3_RA3_01_4008.d/+MS2(607.8486), 33.0eV, 35.4min #9696	ZW_Neuroblastom_E22965-08_3_RA3_01_4008.d	SwissProt-human-oReAlk2019_Mascot_2019-10-14 16:08:34	Protein Search
765.846	-0.434389	1530.69	1530.69	44.7 (M.expect:0.0,M.score:44.7)	1,001 - 1,013	K.DYDSLAQPGFFDR.F	71710	CO6A2_HUMAN	Collagen alpha-2(VI) chain OS=Homo sapiens OX=9606 GN=COL6A2 PE=1 SV=4	2021		TRUE	6326	1529.68	765.847	1529.68	2	-0.000332675	-0.000665351	-0.434675	3.45029	0.00278589	3.91425	0.00358046	53.229	1	1		1	15.879	0				CID	/Neuroblastom-Imaging/Imaging-Sample1/ZW_Neuroblastom_E22965-08_3_RA3_01_4008.d/+MS2(765.8463), 40.9eV, 53.2min #14877	ZW_Neuroblastom_E22965-08_3_RA3_01_4008.d	SwissProt-human-oReAlk2019_Mascot_2019-10-14 16:08:34	Protein Search
403.232	1.08981	805.458	805.457	28.4 (M.expect:0.0,M.score:28.4)	1,519 - 1,525	K.ALEFVAR.N	230972	CO6A3_HUMAN	Collagen alpha-3(VI) chain OS=Homo sapiens OX=9606 GN=COL6A3 PE=1 SV=5	37		TRUE	11540	804.45	403.232	804.449	2	0.000439448	0.000878897	1.09118	16.3607	0.00829055	34.8823	0.0123097	29.7918	1	1		1	34.8907	0				CID	/Neuroblastom-Imaging/Imaging-Sample1/ZW_Neuroblastom_E22965-08_3_RA3_01_4008.d/+MS2(403.2324), 23.1eV, 29.8min #7753	ZW_Neuroblastom_E22965-08_3_RA3_01_4008.d	SwissProt-human-oReAlk2019_Mascot_2019-10-14 16:08:34	Protein Search
425.246	1.74504	849.484	849.483	18.9 (M.expect:0.0,M.score:18.9)	2,698 - 2,704	K.LVDFLSR.G	46550	CO6A3_HUMAN	Collagen alpha-3(VI) chain OS=Homo sapiens OX=9606 GN=COL6A3 PE=1 SV=5	81		TRUE	12848	848.477	425.245	848.476	2	0.000742073	0.00148415	1.74711	7.28744	0.00201007	15.7251	0.00699228	40.1938	1	1		1	34.5143	0				CID	/Neuroblastom-Imaging/Imaging-Sample1/ZW_Neuroblastom_E22965-08_3_RA3_01_4008.d/+MS2(425.2458), 24.0eV, 40.2min #11251	ZW_Neuroblastom_E22965-08_3_RA3_01_4008.d	SwissProt-human-oReAlk2019_Mascot_2019-10-14 16:08:34	Protein Search
457.309	2.23441	913.61	913.608	26.0 (M.expect:0.0,M.score:26.0)	552 - 560	K.LLVLITGGK.S	24604	CO6A3_HUMAN	Collagen alpha-3(VI) chain OS=Homo sapiens OX=9606 GN=COL6A3 PE=1 SV=5	161		TRUE	12125	912.603	457.308	912.601	2	0.00102182	0.00204363	2.23688	5.81569	0.00239245	7.36888	0.00355311	41.9999	1	1		1	24.3992	0				CID	/Neuroblastom-Imaging/Imaging-Sample1/ZW_Neuroblastom_E22965-08_3_RA3_01_4008.d/+MS2(457.3087), 24.1eV, 42.0min #11799	ZW_Neuroblastom_E22965-08_3_RA3_01_4008.d	SwissProt-human-oReAlk2019_Mascot_2019-10-14 16:08:34	Protein Search
492.316	0.417349	983.625	983.625	28.5 (M.expect:0.0,M.score:28.5)	1,976 - 1,984	R.ALILVGLER.V	30504	CO6A3_HUMAN	Collagen alpha-3(VI) chain OS=Homo sapiens OX=9606 GN=COL6A3 PE=1 SV=5	296		TRUE	12219	982.618	492.316	982.618	2	0.000205468	0.000410936	0.417777	3.76162	0.00125762	6.77059	0.00537605	46.9931	1	1		1	37.2963	0				CID	/Neuroblastom-Imaging/Imaging-Sample1/ZW_Neuroblastom_E22965-08_3_RA3_01_4008.d/+MS2(492.3162), 26.7eV, 47.0min #13213	ZW_Neuroblastom_E22965-08_3_RA3_01_4008.d	SwissProt-human-oReAlk2019_Mascot_2019-10-14 16:08:34	Protein Search
496.253	0.708687	991.5	991.499	30.0 (M.expect:0.0,M.score:30.0)	2,705 - 2,713	R.GMTQLQGTR.A	87290	CO6A3_HUMAN	Collagen alpha-3(VI) chain OS=Homo sapiens OX=9606 GN=COL6A3 PE=1 SV=5	318		TRUE	5293	990.492	496.253	990.492	2	0.000351688	0.000703376	0.709407	8.45013	0.00211312	21.83	0.00872024	18.8655	1	1		1	12.8402	0				CID	/Neuroblastom-Imaging/Imaging-Sample1/ZW_Neuroblastom_E22965-08_3_RA3_01_4008.d/+MS2(496.2535), 26.9eV, 18.9min #3772	ZW_Neuroblastom_E22965-08_3_RA3_01_4008.d	SwissProt-human-oReAlk2019_Mascot_2019-10-14 16:08:34	Protein Search
500.259	1.15223	999.512	999.511	23.7 (M.expect:0.0,M.score:23.7)	1,601 - 1,608	R.ELPNIEER.I	1168286	CO6A3_HUMAN	Collagen alpha-3(VI) chain OS=Homo sapiens OX=9606 GN=COL6A3 PE=1 SV=5	334		TRUE	755	998.504	500.259	998.503	2	0.000576416	0.00115283	1.1534	2.80452	0.00139104	3.34496	0.00174895	27.9755	2	1		1	50.4108	0				CID	/Neuroblastom-Imaging/Imaging-Sample1/ZW_Neuroblastom_E22965-08_3_RA3_01_4008.d/+MS2(500.2595), 27.0eV, 28.0min #7127	ZW_Neuroblastom_E22965-08_3_RA3_01_4008.d	SwissProt-human-oReAlk2019_Mascot_2019-10-14 16:08:34	Protein Search
500.26	2.13172	999.513	999.511	30.4 (M.expect:0.0,M.score:30.4)	1,601 - 1,608	R.ELPNIEER.I	387336	CO6A3_HUMAN	Collagen alpha-3(VI) chain OS=Homo sapiens OX=9606 GN=COL6A3 PE=1 SV=5	335		TRUE	3892	998.505	500.259	998.503	2	0.00106642	0.00213283	2.13387	4.59977	0.0039515	20.1656	0.0138918	27.8735	2	1		1	37.9022	0				CID	/Neuroblastom-Imaging/Imaging-Sample1/ZW_Neuroblastom_E22965-08_3_RA3_01_4008.d/+MS2(500.2600), 27.0eV, 27.9min #7090	ZW_Neuroblastom_E22965-08_3_RA3_01_4008.d	SwissProt-human-oReAlk2019_Mascot_2019-10-14 16:08:34	Protein Search
518.775	0.557422	1036.54	1036.54	35.9 (M.expect:0.0,M.score:35.9)	1,067 - 1,075	R.VAVVQYSDR.T	70086	CO6A3_HUMAN	Collagen alpha-3(VI) chain OS=Homo sapiens OX=9606 GN=COL6A3 PE=1 SV=5	416		TRUE	2007	1035.54	518.775	1035.53	2	0.000289177	0.000578353	0.557964	6.34893	0.00358492	9.10011	0.00563744	22.8479	2	1		1	11.8738	0				CID	/Neuroblastom-Imaging/Imaging-Sample1/ZW_Neuroblastom_E22965-08_3_RA3_01_4008.d/+MS2(518.7750), 28.1eV, 22.9min #5249	ZW_Neuroblastom_E22965-08_3_RA3_01_4008.d	SwissProt-human-oReAlk2019_Mascot_2019-10-14 16:08:34	Protein Search
518.775	1.13571	1036.54	1036.54	24.0 (M.expect:0.0,M.score:24.0)	1,067 - 1,075	R.VAVVQYSDR.T	158472	CO6A3_HUMAN	Collagen alpha-3(VI) chain OS=Homo sapiens OX=9606 GN=COL6A3 PE=1 SV=5	417		TRUE	805	1035.54	518.775	1035.53	2	0.000589177	0.00117835	1.13681	4.55954	0.00213893	14.4466	0.0102646	22.7518	2	1		1	21.3209	0				CID	/Neuroblastom-Imaging/Imaging-Sample1/ZW_Neuroblastom_E22965-08_3_RA3_01_4008.d/+MS2(518.7753), 28.2eV, 22.8min #5214	ZW_Neuroblastom_E22965-08_3_RA3_01_4008.d	SwissProt-human-oReAlk2019_Mascot_2019-10-14 16:08:34	Protein Search
519.273	1.81925	1037.54	1037.54	23.3 (M.expect:0.0,M.score:23.3)	1,789 - 1,798	K.IASNSATAFR.V	307234	CO6A3_HUMAN	Collagen alpha-3(VI) chain OS=Homo sapiens OX=9606 GN=COL6A3 PE=1 SV=5	421		TRUE	3194	1036.53	519.272	1036.53	2	0.00094469	0.00188938	1.82102	6.44266	0.003426	15.1647	0.0102214	20.6934	1	1		1	26.7107	0				CID	/Neuroblastom-Imaging/Imaging-Sample1/ZW_Neuroblastom_E22965-08_3_RA3_01_4008.d/+MS2(519.2733), 28.2eV, 20.7min #4439	ZW_Neuroblastom_E22965-08_3_RA3_01_4008.d	SwissProt-human-oReAlk2019_Mascot_2019-10-14 16:08:34	Protein Search
535.304	0.94257	1069.6	1069.6	28.1 (M.expect:0.0,M.score:28.1)	1,495 - 1,504	R.SQAPVLDAIR.R	258820	CO6A3_HUMAN	Collagen alpha-3(VI) chain OS=Homo sapiens OX=9606 GN=COL6A3 PE=1 SV=5	490		TRUE	6530	1068.59	535.304	1068.59	2	0.000504562	0.00100912	0.943458	6.71639	0.00187541	18.8224	0.00510468	34.8551	1	1		1	50.0443	0				CID	/Neuroblastom-Imaging/Imaging-Sample1/ZW_Neuroblastom_E22965-08_3_RA3_01_4008.d/+MS2(535.3042), 29.1eV, 34.9min #9514	ZW_Neuroblastom_E22965-08_3_RA3_01_4008.d	SwissProt-human-oReAlk2019_Mascot_2019-10-14 16:08:34	Protein Search
573.81	0.955156	1146.61	1146.61	29.0 (M.expect:0.0,M.score:29.0)	1,565 - 1,576	R.SSGIVSLGVGDR.N	363996	CO6A3_HUMAN	Collagen alpha-3(VI) chain OS=Homo sapiens OX=9606 GN=COL6A3 PE=1 SV=5	701		TRUE	3023	1145.61	573.809	1145.6	2	0.000548078	0.00109616	0.955995	4.28646	0.00175725	5.76199	0.00246078	34.9057	2	1		1	40.0775	0				CID	/Neuroblastom-Imaging/Imaging-Sample1/ZW_Neuroblastom_E22965-08_3_RA3_01_4008.d/+MS2(573.8099), 31.4eV, 34.9min #9533	ZW_Neuroblastom_E22965-08_3_RA3_01_4008.d	SwissProt-human-oReAlk2019_Mascot_2019-10-14 16:08:34	Protein Search
573.81	1.65225	1146.61	1146.61	31.6 (M.expect:0.0,M.score:31.6)	1,565 - 1,576	R.SSGIVSLGVGDR.N	64044	CO6A3_HUMAN	Collagen alpha-3(VI) chain OS=Homo sapiens OX=9606 GN=COL6A3 PE=1 SV=5	702		TRUE	1492	1145.61	573.809	1145.6	2	0.000948078	0.00189616	1.6537	5.9709	0.00477551	13.8802	0.0131201	34.8623	2	1		1	22.6207	0				CID	/Neuroblastom-Imaging/Imaging-Sample1/ZW_Neuroblastom_E22965-08_3_RA3_01_4008.d/+MS2(573.8103), 31.4eV, 34.9min #9522	ZW_Neuroblastom_E22965-08_3_RA3_01_4008.d	SwissProt-human-oReAlk2019_Mascot_2019-10-14 16:08:34	Protein Search
603.835	0.42604	1206.66	1206.66	50.7 (M.expect:0.0,M.score:50.7)	1,361 - 1,371	K.QFGVAPFTIAR.N	168922	CO6A3_HUMAN	Collagen alpha-3(VI) chain OS=Homo sapiens OX=9606 GN=COL6A3 PE=1 SV=5	894		TRUE	9761	1205.66	603.835	1205.66	2	0.000257258	0.000514516	0.426395	5.51838	0.00255433	10.1703	0.00601187	48.1139	1	1		1	40.4461	0				CID	/Neuroblastom-Imaging/Imaging-Sample1/ZW_Neuroblastom_E22965-08_3_RA3_01_4008.d/+MS2(603.8354), 33.0eV, 48.1min #13508	ZW_Neuroblastom_E22965-08_3_RA3_01_4008.d	SwissProt-human-oReAlk2019_Mascot_2019-10-14 16:08:34	Protein Search
604.811	-0.298044	1208.62	1208.62	57.5 (M.expect:0.0,M.score:57.5)	875 - 885	R.IAVAQYSDDVK.V	52716	CO6A3_HUMAN	Collagen alpha-3(VI) chain OS=Homo sapiens OX=9606 GN=COL6A3 PE=1 SV=5	898		TRUE	3108	1207.61	604.812	1207.61	2	-0.00018026	-0.00036052	-0.298292	6.37214	0.0040981	19.7279	0.00988191	28.0337	1	1		1	16.4152	0				CID	/Neuroblastom-Imaging/Imaging-Sample1/ZW_Neuroblastom_E22965-08_3_RA3_01_4008.d/+MS2(604.8113), 33.0eV, 28.0min #7154	ZW_Neuroblastom_E22965-08_3_RA3_01_4008.d	SwissProt-human-oReAlk2019_Mascot_2019-10-14 16:08:34	Protein Search
615.3	0.77787	1229.59	1229.59	24.0 (M.expect:0.0,M.score:24.0)	534 - 544	R.NNLFTSSAGYR.A	310946	CO6A3_HUMAN	Collagen alpha-3(VI) chain OS=Homo sapiens OX=9606 GN=COL6A3 PE=1 SV=5	961		TRUE	3433	1228.58	615.299	1228.58	2	0.000478623	0.000957247	0.778508	5.52633	0.00205409	7.11008	0.00388394	29.8933	1	1		1	47.9941	0				CID	/Neuroblastom-Imaging/Imaging-Sample1/ZW_Neuroblastom_E22965-08_3_RA3_01_4008.d/+MS2(615.2996), 33.0eV, 29.9min #7785	ZW_Neuroblastom_E22965-08_3_RA3_01_4008.d	SwissProt-human-oReAlk2019_Mascot_2019-10-14 16:08:34	Protein Search
615.364	-3.24311	1229.72	1229.73	63.3 (M.expect:0.0,M.score:63.3)	1,743 - 1,754	R.VPQIAFVITGGK.S	56948	CO6A3_HUMAN	Collagen alpha-3(VI) chain OS=Homo sapiens OX=9606 GN=COL6A3 PE=1 SV=5	965		TRUE	8324	1228.71	615.366	1228.72	2	-0.0019957	-0.00399139	-3.24577	7.78664	0.00339621	11.3068	0.00790115	49.8073	1	1		1	29.1059	0				CID	/Neuroblastom-Imaging/Imaging-Sample1/ZW_Neuroblastom_E22965-08_3_RA3_01_4008.d/+MS2(615.3643), 33.0eV, 49.8min #13972	ZW_Neuroblastom_E22965-08_3_RA3_01_4008.d	SwissProt-human-oReAlk2019_Mascot_2019-10-14 16:08:34	Protein Search
623.304	0.323995	1245.6	1245.6	29.1 (M.expect:0.0,M.score:29.1)	2,685 - 2,695	K.VEFSLTDYGSK.E	119186	CO6A3_HUMAN	Collagen alpha-3(VI) chain OS=Homo sapiens OX=9606 GN=COL6A3 PE=1 SV=5	1009		TRUE	9684	1244.59	623.304	1244.59	2	0.000201947	0.000403895	0.324257	1.85449	0.00146028	3.13675	0.00201969	40.8583	1	1		1	20.5729	0				CID	/Neuroblastom-Imaging/Imaging-Sample1/ZW_Neuroblastom_E22965-08_3_RA3_01_4008.d/+MS2(623.3037), 33.0eV, 40.9min #11452	ZW_Neuroblastom_E22965-08_3_RA3_01_4008.d	SwissProt-human-oReAlk2019_Mascot_2019-10-14 16:08:34	Protein Search
644.331	0.747333	1287.65	1287.65	50.0 (M.expect:0.0,M.score:50.0)	1,581 - 1,591	R.TELQTITNDPR.L	324348	CO6A3_HUMAN	Collagen alpha-3(VI) chain OS=Homo sapiens OX=9606 GN=COL6A3 PE=1 SV=5	1187		TRUE	2596	1286.65	644.331	1286.65	2	0.00048153	0.000963059	0.747917	4.93965	0.00410969	14.7305	0.0101365	26.5152	1	1		1	32.1478	0				CID	/Neuroblastom-Imaging/Imaging-Sample1/ZW_Neuroblastom_E22965-08_3_RA3_01_4008.d/+MS2(644.3311), 33.0eV, 26.5min #6603	ZW_Neuroblastom_E22965-08_3_RA3_01_4008.d	SwissProt-human-oReAlk2019_Mascot_2019-10-14 16:08:34	Protein Search
660.868	-1.27488	1320.73	1320.73	35.4 (M.expect:0.0,M.score:35.4)	965 - 976	K.QSGVVPFIFQAK.N	44440	CO6A3_HUMAN	Collagen alpha-3(VI) chain OS=Homo sapiens OX=9606 GN=COL6A3 PE=1 SV=5	1325		TRUE	8797	1319.72	660.869	1319.72	2	-0.000842525	-0.00168505	-1.27585	5.98176	0.00416608	11.8615	0.0093192	51.6402	2	1		1	36.733	0				CID	/Neuroblastom-Imaging/Imaging-Sample1/ZW_Neuroblastom_E22965-08_3_RA3_01_4008.d/+MS2(660.8683), 33.0eV, 51.6min #14449	ZW_Neuroblastom_E22965-08_3_RA3_01_4008.d	SwissProt-human-oReAlk2019_Mascot_2019-10-14 16:08:34	Protein Search
660.869	-0.488032	1320.73	1320.73	57.7 (M.expect:0.0,M.score:57.7)	965 - 976	K.QSGVVPFIFQAK.N	205920	CO6A3_HUMAN	Collagen alpha-3(VI) chain OS=Homo sapiens OX=9606 GN=COL6A3 PE=1 SV=5	1326		TRUE	9163	1319.72	660.869	1319.72	2	-0.000322525	-0.00064505	-0.488404	6.72574	0.00579989	8.72768	0.00735265	51.6884	2	1		1	36.8189	0				CID	/Neuroblastom-Imaging/Imaging-Sample1/ZW_Neuroblastom_E22965-08_3_RA3_01_4008.d/+MS2(660.8688), 33.0eV, 51.7min #14461	ZW_Neuroblastom_E22965-08_3_RA3_01_4008.d	SwissProt-human-oReAlk2019_Mascot_2019-10-14 16:08:34	Protein Search
679.375	0.220313	1357.74	1357.74	57.6 (M.expect:0.0,M.score:57.6)	1,193 - 1,204	R.QLGTVQQVISER.V	265504	CO6A3_HUMAN	Collagen alpha-3(VI) chain OS=Homo sapiens OX=9606 GN=COL6A3 PE=1 SV=5	1473		TRUE	5409	1356.74	679.375	1356.74	2	0.000149675	0.00029935	0.220476	6.15966	0.00446478	10.5361	0.00717032	34.3849	1	1		1	44.3297	0				CID	/Neuroblastom-Imaging/Imaging-Sample1/ZW_Neuroblastom_E22965-08_3_RA3_01_4008.d/+MS2(679.3755), 33.0eV, 34.4min #9349	ZW_Neuroblastom_E22965-08_3_RA3_01_4008.d	SwissProt-human-oReAlk2019_Mascot_2019-10-14 16:08:34	Protein Search
702.396	-3.76441	1403.78	1403.79	20.8 (M.expect:0.0,M.score:20.8)	2,533 - 2,545	K.LSDAGITPLFLTR.Q	9950	CO6A3_HUMAN	Collagen alpha-3(VI) chain OS=Homo sapiens OX=9606 GN=COL6A3 PE=1 SV=5	1644		TRUE	13738	1402.78	702.398	1402.78	2	-0.00264411	-0.00528821	-3.76711	9.90532	0.00725806	11.5188	0.00927947	58.3981	3	1		1	13.593	0				CID	/Neuroblastom-Imaging/Imaging-Sample1/ZW_Neuroblastom_E22965-08_3_RA3_01_4008.d/+MS2(702.3956), 33.3eV, 58.4min #16239	ZW_Neuroblastom_E22965-08_3_RA3_01_4008.d	SwissProt-human-oReAlk2019_Mascot_2019-10-14 16:08:34	Protein Search
702.398	-0.874298	1403.79	1403.79	79.4 (M.expect:0.0,M.score:79.4)	2,533 - 2,545	K.LSDAGITPLFLTR.Q	278354	CO6A3_HUMAN	Collagen alpha-3(VI) chain OS=Homo sapiens OX=9606 GN=COL6A3 PE=1 SV=5	1645		TRUE	7294	1402.78	702.398	1402.78	2	-0.000614105	-0.00122821	-0.874926	4.12581	0.00285194	5.98274	0.00485392	55.5273	3	1		1	35.3825	0				CID	/Neuroblastom-Imaging/Imaging-Sample1/ZW_Neuroblastom_E22965-08_3_RA3_01_4008.d/+MS2(702.3977), 33.3eV, 55.5min #15498	ZW_Neuroblastom_E22965-08_3_RA3_01_4008.d	SwissProt-human-oReAlk2019_Mascot_2019-10-14 16:08:34	Protein Search
702.399	0.649054	1403.79	1403.79	66.0 (M.expect:0.0,M.score:66.0)	2,533 - 2,545	K.LSDAGITPLFLTR.Q	35410	CO6A3_HUMAN	Collagen alpha-3(VI) chain OS=Homo sapiens OX=9606 GN=COL6A3 PE=1 SV=5	1646		TRUE	10302	1402.78	702.398	1402.78	2	0.000455895	0.00091179	0.64952	5.29472	0.00355511	7.02691	0.00595092	55.4782	3	1		1	39.3047	0				CID	/Neuroblastom-Imaging/Imaging-Sample1/ZW_Neuroblastom_E22965-08_3_RA3_01_4008.d/+MS2(702.3987), 33.3eV, 55.5min #15486	ZW_Neuroblastom_E22965-08_3_RA3_01_4008.d	SwissProt-human-oReAlk2019_Mascot_2019-10-14 16:08:34	Protein Search
487.293	1.00671	1459.86	1459.86	31.5 (M.expect:0.0,M.score:31.5)	1,002 - 1,014	K.IGDLHPQIVNLLK.S	45132	CO6A3_HUMAN	Collagen alpha-3(VI) chain OS=Homo sapiens OX=9606 GN=COL6A3 PE=1 SV=5	1788		TRUE	11146	1458.86	487.293	1458.86	3	0.000490564	0.00147169	1.0081	8.9771	0.00460053	17.5038	0.00928904	45.8155	1	1		1	20.3187	0				CID	/Neuroblastom-Imaging/Imaging-Sample1/ZW_Neuroblastom_E22965-08_3_RA3_01_4008.d/+MS2(487.2930), 24.7eV, 45.8min #12871	ZW_Neuroblastom_E22965-08_3_RA3_01_4008.d	SwissProt-human-oReAlk2019_Mascot_2019-10-14 16:08:34	Protein Search
731.885	-0.850115	1462.76	1462.76	61.6 (M.expect:0.0,M.score:61.6)	1,309 - 1,321	R.QINVGNALEYVSR.N	39206	CO6A3_HUMAN	Collagen alpha-3(VI) chain OS=Homo sapiens OX=9606 GN=COL6A3 PE=1 SV=5	1799		TRUE	7941	1461.76	731.886	1461.76	2	-0.000622187	-0.00124437	-0.8507	3.3007	0.00213749	5.58626	0.00316914	45.7622	2	1		1	37.4828	0				CID	/Neuroblastom-Imaging/Imaging-Sample1/ZW_Neuroblastom_E22965-08_3_RA3_01_4008.d/+MS2(731.8855), 36.8eV, 45.8min #12855	ZW_Neuroblastom_E22965-08_3_RA3_01_4008.d	SwissProt-human-oReAlk2019_Mascot_2019-10-14 16:08:34	Protein Search
731.886	0.188299	1462.77	1462.76	81.1 (M.expect:0.0,M.score:81.1)	1,309 - 1,321	R.QINVGNALEYVSR.N	287552	CO6A3_HUMAN	Collagen alpha-3(VI) chain OS=Homo sapiens OX=9606 GN=COL6A3 PE=1 SV=5	1800		TRUE	7915	1461.76	731.886	1461.76	2	0.000137813	0.000275626	0.188428	3.98125	0.00256413	5.68769	0.00355781	45.8094	2	1		1	41.625	0				CID	/Neuroblastom-Imaging/Imaging-Sample1/ZW_Neuroblastom_E22965-08_3_RA3_01_4008.d/+MS2(731.8862), 36.8eV, 45.8min #12866	ZW_Neuroblastom_E22965-08_3_RA3_01_4008.d	SwissProt-human-oReAlk2019_Mascot_2019-10-14 16:08:34	Protein Search
747.377	-0.903999	1493.75	1493.75	46.2 (M.expect:0.0,M.score:46.2)	2,994 - 3,006	R.EVQVFEITENSAK.L	71628	CO6A3_HUMAN	Collagen alpha-3(VI) chain OS=Homo sapiens OX=9606 GN=COL6A3 PE=1 SV=5	1907		TRUE	8832	1492.74	747.378	1492.74	2	-0.000675628	-0.00135126	-0.904609	3.63362	0.00379252	11.9293	0.00777848	40.9109	2	1		1	19.6257	0				CID	/Neuroblastom-Imaging/Imaging-Sample1/ZW_Neuroblastom_E22965-08_3_RA3_01_4008.d/+MS2(747.3771), 38.7eV, 40.9min #11470	ZW_Neuroblastom_E22965-08_3_RA3_01_4008.d	SwissProt-human-oReAlk2019_Mascot_2019-10-14 16:08:34	Protein Search
747.377	-0.823718	1493.75	1493.75	73.0 (M.expect:0.0,M.score:73.0)	2,994 - 3,006	R.EVQVFEITENSAK.L	24980	CO6A3_HUMAN	Collagen alpha-3(VI) chain OS=Homo sapiens OX=9606 GN=COL6A3 PE=1 SV=5	1908		TRUE	7936	1492.74	747.378	1492.74	2	-0.000615628	-0.00123126	-0.824274	5.73944	0.0030355	10.2924	0.0113792	40.8718	2	1		1	21.1191	0				CID	/Neuroblastom-Imaging/Imaging-Sample1/ZW_Neuroblastom_E22965-08_3_RA3_01_4008.d/+MS2(747.3771), 38.7eV, 40.9min #11460	ZW_Neuroblastom_E22965-08_3_RA3_01_4008.d	SwissProt-human-oReAlk2019_Mascot_2019-10-14 16:08:34	Protein Search
793.967	-0.0191403	1586.93	1586.93	57.7 (M.expect:0.0,M.score:57.7)	1,216 - 1,231	R.LQPVLQPLPSPGVGGK.R	232506	CO6A3_HUMAN	Collagen alpha-3(VI) chain OS=Homo sapiens OX=9606 GN=COL6A3 PE=1 SV=5	2240		TRUE	6423	1585.92	793.967	1585.92	2	-1.51967e-05	-3.03935e-05	-0.0191524	7.49129	0.00338394	15.1627	0.0113048	46.2177	1	1		1	32.7817	0				CID	/Neuroblastom-Imaging/Imaging-Sample1/ZW_Neuroblastom_E22965-08_3_RA3_01_4008.d/+MS2(793.9669), 44.3eV, 46.2min #12981	ZW_Neuroblastom_E22965-08_3_RA3_01_4008.d	SwissProt-human-oReAlk2019_Mascot_2019-10-14 16:08:34	Protein Search
544.613	0.94384	1631.83	1631.82	33.4 (M.expect:0.0,M.score:33.4)	1,755 - 1,769	K.SVEDAQDVSLALTQR.G	193024	CO6A3_HUMAN	Collagen alpha-3(VI) chain OS=Homo sapiens OX=9606 GN=COL6A3 PE=1 SV=5	2438		TRUE	6184	1630.82	544.613	1630.82	3	0.000514028	0.00154208	0.945005	16.9926	0.0080945	25.4487	0.009816	41.6337	1	1		1	11.3098	0				CID	/Neuroblastom-Imaging/Imaging-Sample1/ZW_Neuroblastom_E22965-08_3_RA3_01_4008.d/+MS2(544.6132), 29.8eV, 41.6min #11683	ZW_Neuroblastom_E22965-08_3_RA3_01_4008.d	SwissProt-human-oReAlk2019_Mascot_2019-10-14 16:08:34	Protein Search
817.476	-0.798803	1633.94	1633.95	26.5 (M.expect:0.0,M.score:26.5)	610 - 625	R.AAPLQGMLPGLLAPLR.T	16116	CO6A3_HUMAN	Collagen alpha-3(VI) chain OS=Homo sapiens OX=9606 GN=COL6A3 PE=1 SV=5	2460		TRUE	12992	1632.94	817.477	1632.94	2	-0.000653002	-0.001306	-0.799296	7.09594	0.00380725	30.7232	0.00936897	58.7649	1	1		1	20.0631	0	Oxidation: 7			CID	/Neuroblastom-Imaging/Imaging-Sample1/ZW_Neuroblastom_E22965-08_3_RA3_01_4008.d/+MS2(817.4759), 45.9eV, 58.8min #16330	ZW_Neuroblastom_E22965-08_3_RA3_01_4008.d	SwissProt-human-oReAlk2019_Mascot_2019-10-14 16:08:34	Protein Search
558.658	0.915733	1673.96	1673.96	25.6 (M.expect:0.0,M.score:25.6)	1,536 - 1,551	R.IEDGVPQHLVLVLGGK.S	30292	CO6A3_HUMAN	Collagen alpha-3(VI) chain OS=Homo sapiens OX=9606 GN=COL6A3 PE=1 SV=5	2592		TRUE	8787	1672.95	558.658	1672.95	3	0.000511581	0.00153474	0.916835	4.66427	0.00226279	17.4252	0.00892875	47.7719	1	1		1	20.5535	0				CID	/Neuroblastom-Imaging/Imaging-Sample1/ZW_Neuroblastom_E22965-08_3_RA3_01_4008.d/+MS2(558.6582), 26.2eV, 47.8min #13428	ZW_Neuroblastom_E22965-08_3_RA3_01_4008.d	SwissProt-human-oReAlk2019_Mascot_2019-10-14 16:08:34	Protein Search
560.625	0.11688	1679.86	1679.86	74.0 (M.expect:0.0,M.score:74.0)	875 - 889	R.IAVAQYSDDVKVESR.F	72064	CO6A3_HUMAN	Collagen alpha-3(VI) chain OS=Homo sapiens OX=9606 GN=COL6A3 PE=1 SV=5	2600		TRUE	1588	1678.85	560.625	1678.85	3	6.55257e-05	0.000196577	0.11702	5.80473	0.00282974	10.0754	0.0066194	29.3316	1	1		1	19.2892	1				CID	/Neuroblastom-Imaging/Imaging-Sample1/ZW_Neuroblastom_E22965-08_3_RA3_01_4008.d/+MS2(560.6249), 26.2eV, 29.3min #7612	ZW_Neuroblastom_E22965-08_3_RA3_01_4008.d	SwissProt-human-oReAlk2019_Mascot_2019-10-14 16:08:34	Protein Search
843.488	0.252056	1685.97	1685.97	45.4 (M.expect:0.0,M.score:45.4)	1,404 - 1,418	K.LLTPITTLTSEQIQK.L	58486	CO6A3_HUMAN	Collagen alpha-3(VI) chain OS=Homo sapiens OX=9606 GN=COL6A3 PE=1 SV=5	2616		TRUE	9836	1684.96	843.488	1684.96	2	0.000212606	0.000425212	0.252207	4.93241	0.00357345	7.31026	0.00533011	49.6978	1	1		1	17.428	0				CID	/Neuroblastom-Imaging/Imaging-Sample1/ZW_Neuroblastom_E22965-08_3_RA3_01_4008.d/+MS2(843.4880), 47.2eV, 49.7min #13940	ZW_Neuroblastom_E22965-08_3_RA3_01_4008.d	SwissProt-human-oReAlk2019_Mascot_2019-10-14 16:08:34	Protein Search
581.337	0.193007	1742	1742	50.5 (M.expect:0.0,M.score:50.5)	1,739 - 1,754	R.LDQRVPQIAFVITGGK.S	97240	CO6A3_HUMAN	Collagen alpha-3(VI) chain OS=Homo sapiens OX=9606 GN=COL6A3 PE=1 SV=5	2803		TRUE	10169	1740.99	581.337	1740.99	3	0.000112202	0.000336606	0.19323	6.59991	0.00483869	13.5365	0.0110786	49.3435	1	1		1	26.7144	1				CID	/Neuroblastom-Imaging/Imaging-Sample1/ZW_Neuroblastom_E22965-08_3_RA3_01_4008.d/+MS2(581.3369), 26.6eV, 49.3min #13844	ZW_Neuroblastom_E22965-08_3_RA3_01_4008.d	SwissProt-human-oReAlk2019_Mascot_2019-10-14 16:08:34	Protein Search
581.681	0.79776	1743.03	1743.03	34.1 (M.expect:0.0,M.score:34.1)	1,216 - 1,232	R.LQPVLQPLPSPGVGGKR.D	35306	CO6A3_HUMAN	Collagen alpha-3(VI) chain OS=Homo sapiens OX=9606 GN=COL6A3 PE=1 SV=5	2806		TRUE	2896	1742.02	581.681	1742.02	3	0.000464042	0.00139213	0.798682	4.33659	0.00304477	10.7469	0.00536012	37.7173	2	1		1	25.7377	1				CID	/Neuroblastom-Imaging/Imaging-Sample1/ZW_Neuroblastom_E22965-08_3_RA3_01_4008.d/+MS2(581.6812), 26.6eV, 37.7min #10477	ZW_Neuroblastom_E22965-08_3_RA3_01_4008.d	SwissProt-human-oReAlk2019_Mascot_2019-10-14 16:08:34	Protein Search
581.682	1.50261	1743.03	1743.03	24.3 (M.expect:0.0,M.score:24.3)	1,216 - 1,232	R.LQPVLQPLPSPGVGGKR.D	167510	CO6A3_HUMAN	Collagen alpha-3(VI) chain OS=Homo sapiens OX=9606 GN=COL6A3 PE=1 SV=5	2807		TRUE	6701	1742.02	581.681	1742.02	3	0.000874042	0.00262213	1.50435	3.22276	0.00285187	4.37647	0.00364349	37.8169	2	1		1	37.3656	1				CID	/Neuroblastom-Imaging/Imaging-Sample1/ZW_Neuroblastom_E22965-08_3_RA3_01_4008.d/+MS2(581.6816), 26.6eV, 37.8min #10507	ZW_Neuroblastom_E22965-08_3_RA3_01_4008.d	SwissProt-human-oReAlk2019_Mascot_2019-10-14 16:08:34	Protein Search
595.974	-0.564275	1785.91	1785.91	26.6 (M.expect:0.0,M.score:26.6)	1,577 - 1,591	R.NIDRTELQTITNDPR.L	59830	CO6A3_HUMAN	Collagen alpha-3(VI) chain OS=Homo sapiens OX=9606 GN=COL6A3 PE=1 SV=5	2963		TRUE	2279	1784.9	595.975	1784.9	3	-0.000336294	-0.00100888	-0.564912	5.42996	0.00346181	9.85623	0.00618918	30.3183	1	1		1	28.0139	1				CID	/Neuroblastom-Imaging/Imaging-Sample1/ZW_Neuroblastom_E22965-08_3_RA3_01_4008.d/+MS2(595.9742), 26.9eV, 30.3min #7940	ZW_Neuroblastom_E22965-08_3_RA3_01_4008.d	SwissProt-human-oReAlk2019_Mascot_2019-10-14 16:08:34	Protein Search
681.02	1.01747	2041.04	2041.04	35.9 (M.expect:0.0,M.score:35.9)	515 - 533	K.MKPLDGSALYTGSALDFVR.N	8632	CO6A3_HUMAN	Collagen alpha-3(VI) chain OS=Homo sapiens OX=9606 GN=COL6A3 PE=1 SV=5	3475		TRUE	11313	2040.04	681.019	2040.04	3	0.00069292	0.00207876	1.01848	22.1149	0.0125121	26.7492	0.0138243	53.2906	1	1		1	21.9002	0				CID	/Neuroblastom-Imaging/Imaging-Sample1/ZW_Neuroblastom_E22965-08_3_RA3_01_4008.d/+MS2(681.0196), 27.0eV, 53.3min #14897	ZW_Neuroblastom_E22965-08_3_RA3_01_4008.d	SwissProt-human-oReAlk2019_Mascot_2019-10-14 16:08:34	Protein Search
714.374	-1.38767	2141.11	2141.11	40.7 (M.expect:0.0,M.score:40.7)	2,228 - 2,251	R.GAQGPAGPAGPPGLIGEQGISGPR.G	35260	CO6A3_HUMAN	Collagen alpha-3(VI) chain OS=Homo sapiens OX=9606 GN=COL6A3 PE=1 SV=5	3634		TRUE	5850	2140.1	714.375	2140.1	3	-0.000991318	-0.00297395	-1.38898	9.08451	0.00634776	14.0481	0.00869571	43.2731	1	1		1	19.5338	0				CID	/Neuroblastom-Imaging/Imaging-Sample1/ZW_Neuroblastom_E22965-08_3_RA3_01_4008.d/+MS2(714.3738), 28.9eV, 43.3min #12162	ZW_Neuroblastom_E22965-08_3_RA3_01_4008.d	SwissProt-human-oReAlk2019_Mascot_2019-10-14 16:08:34	Protein Search
[truncated: 3,358 more rows]
